# Supplementary material for: Efficient Production of Pyruvate Using Metabolically Engineered Lactococcus lactis
Source: Front Bioeng Biotechnol. 2021 Jan 6;8:611701. doi: 10.3389/fbioe.2020.611701 (PMC7815928; doi:10.3389/fbioe.2020.611701)
Supplement: Supplementary file 1 [file Table_1.XLSX]

## Sheet: Table 1
# FS1072 grown on SAL vs M17(Control)
Gene_code	Gene	LogFC	AveExpr	t	P.Value	adj.P.Val	B	Referred genome	Database	Start	End	Strand	Tag	Locus_information	Pathway_code	Pathway	Gene information
llmg_0334	gene347	-5.4364	8.66172	-23.9053	6.17248e-09	8.91491e-06	11.137	NC_009004.1	RefSeq	322003	322551	-	LLMG_RS01725;llmg_0334;	LLMG_RS01725	n	n	transcript_id gene347; gene_id gene347; gene_name thiT; Dbxref Genbank:WP_011834396.1; Name WP_011834396.1; gbkey CDS; inference COORDINATES: similar to AA sequence:RefSeq:WP_011675374.1; product thiamine transporter ThiT; transl_table 11; Name thiT; gbkey Gene; gene_biotype protein_coding; locus_tag LLMG_RS01725; old_locus_tag llmg_0334; protein_id WP_011834396.1;
llmg_0697	gene726	4.37358	10.77	21.2369	1.62212e-08	8.91491e-06	10.3214	NC_009004.1	RefSeq	683542	684558	+	LLMG_RS03595;llmg_0697;	LLMG_RS03595	llm02024	Quorum sensing	transcript_id gene726; gene_id gene726; gene_name LLMG_RS03595; Dbxref Genbank:WP_011834692.1; Name WP_011834692.1; gbkey CDS; inference COORDINATES: similar to AA sequence:RefSeq:NP_267998.1; product ABC transporter ATP-binding protein; transl_table 11; gbkey Gene; gene_biotype protein_coding; locus_tag LLMG_RS03595; old_locus_tag llmg_0697; protein_id WP_011834692.1;
llmg_0699	gene728	4.08727	10.0625	22.5442	9.96498e-09	8.91491e-06	10.7837	NC_009004.1	RefSeq	685495	686454	+	LLMG_RS03605;llmg_0699;	LLMG_RS03605	llm02024	Quorum sensing	transcript_id gene728; gene_id gene728; gene_name LLMG_RS03605; Dbxref Genbank:WP_010906163.1; Name WP_010906163.1; gbkey CDS; inference COORDINATES: similar to AA sequence:RefSeq:NP_267996.1; product peptide ABC transporter permease; transl_table 11; gbkey Gene; gene_biotype protein_coding; locus_tag LLMG_RS03605; old_locus_tag llmg_0699; protein_id WP_010906163.1;
llmg_0700	gene729	4.58592	10.5466	21.7251	1.34775e-08	8.91491e-06	10.4827	NC_009004.1	RefSeq	686464	687348	+	LLMG_RS03610;llmg_0700;	LLMG_RS03610	llm02024	Quorum sensing	transcript_id gene729; gene_id gene729; gene_name LLMG_RS03610; Dbxref Genbank:WP_003140250.1; Name WP_003140250.1; gbkey CDS; inference COORDINATES: similar to AA sequence:RefSeq:NP_267995.1; product peptide ABC transporter permease; transl_table 11; gbkey Gene; gene_biotype protein_coding; locus_tag LLMG_RS03610; old_locus_tag llmg_0700; protein_id WP_003140250.1;
llmg_0701	gene730	4.67337	12.0125	19.8699	2.7879e-08	8.91491e-06	9.77844	NC_009004.1	RefSeq	687458	689260	+	LLMG_RS03615;llmg_0701;	LLMG_RS03615	llm02024	Quorum sensing	transcript_id gene730; gene_id gene730; gene_name LLMG_RS03615; Dbxref Genbank:WP_011834693.1; Name WP_011834693.1; gbkey CDS; inference COORDINATES: similar to AA sequence:RefSeq:NP_267994.1; product oligopeptide-binding protein oppA; transl_table 11; gbkey Gene; gene_biotype protein_coding; locus_tag LLMG_RS03615; old_locus_tag llmg_0701; protein_id WP_011834693.1;
llmg_0702	gene731	4.05177	10.0887	19.7824	2.88976e-08	8.91491e-06	9.82014	NC_009004.1	RefSeq	689385	691268	+	LLMG_RS03620;llmg_0702;	LLMG_RS03620	n	n	transcript_id gene731; gene_id gene731; gene_name LLMG_RS03620; Dbxref Genbank:WP_011834694.1; Name WP_011834694.1; gbkey CDS; inference COORDINATES: similar to AA sequence:RefSeq:NP_267960.1; product peptidase M13; transl_table 11; gbkey Gene; gene_biotype protein_coding; locus_tag LLMG_RS03620; old_locus_tag llmg_0702; protein_id WP_011834694.1;
llmg_0891	gene917	3.99283	9.32205	20.0084	2.63481e-08	8.91491e-06	9.90811	NC_009004.1	RefSeq	861704	862996	+	LLMG_RS04555;llmg_0891;	LLMG_RS04555	n	n	transcript_id gene917; gene_id gene917; gene_name LLMG_RS04555; Dbxref Genbank:WP_011834850.1; Name WP_011834850.1; gbkey CDS; inference COORDINATES: similar to AA sequence:RefSeq:NP_267759.1; product uracil transporter; transl_table 11; gbkey Gene; gene_biotype protein_coding; locus_tag LLMG_RS04555; old_locus_tag llmg_0891; protein_id WP_011834850.1;
llmg_1509	gene1524	3.71806	7.33749	20.1041	2.53452e-08	8.91491e-06	9.91181	NC_009004.1	RefSeq	1483705	1484334	-	LLMG_RS07605;llmg_1509;	LLMG_RS07605	llm00240	Pyrimidine metabolism	transcript_id gene1524; gene_id gene1524; gene_name LLMG_RS07605; Dbxref Genbank:WP_011835354.1; Name WP_011835354.1; gbkey CDS; inference COORDINATES: similar to AA sequence:RefSeq:WP_011676071.1; product orotate phosphoribosyltransferase; transl_table 11; gbkey Gene; gene_biotype protein_coding; locus_tag LLMG_RS07605; old_locus_tag llmg_1509; protein_id WP_011835354.1;
llmg_0698	gene727	4.35912	10.224	19.3217	3.49949e-08	9.59638e-06	9.63024	NC_009004.1	RefSeq	684555	685514	+	LLMG_RS03600;llmg_0698;	LLMG_RS03600	llm02024	Quorum sensing	transcript_id gene727; gene_id gene727; gene_name LLMG_RS03600; Dbxref Genbank:WP_010906164.1; Name WP_010906164.1; gbkey CDS; inference COORDINATES: similar to AA sequence:RefSeq:NP_267997.1; product oligopeptide transport ATP-binding protein OppF; transl_table 11; gbkey Gene; gene_biotype protein_coding; locus_tag LLMG_RS03600; old_locus_tag llmg_0698; protein_id WP_010906164.1;
llmg_0075	gene83	-2.91876	9.29534	-17.6609	7.25135e-08	1.1994e-05	8.9668	NC_009004.1	RefSeq	70691	71692	-	LLMG_RS00410;llmg_0075;	LLMG_RS00410	n	n	transcript_id gene83; gene_id gene83; gene_name LLMG_RS00410; Dbxref Genbank:WP_011834178.1; Name WP_011834178.1; gbkey CDS; inference COORDINATES: similar to AA sequence:RefSeq:NP_266219.1; product lipoate--protein ligase A; transl_table 11; gbkey Gene; gene_biotype protein_coding; locus_tag LLMG_RS00410; old_locus_tag llmg_0075; protein_id WP_011834178.1;
llmg_0890	gene916	4.51205	8.58689	17.6127	7.41354e-08	1.1994e-05	8.91533	NC_009004.1	RefSeq	861083	861604	+	LLMG_RS04550;llmg_0890;	LLMG_RS04550	llm00240	Pyrimidine metabolism	transcript_id gene916; gene_id gene916; gene_name LLMG_RS04550; Dbxref Genbank:WP_011676642.1; Name WP_011676642.1; gbkey CDS; inference COORDINATES: similar to AA sequence:RefSeq:NP_267760.1; product phosphoribosyltransferase; transl_table 11; gbkey Gene; gene_biotype protein_coding; locus_tag LLMG_RS04550; old_locus_tag llmg_0890; protein_id WP_011676642.1;
llmg_0893	gene918	3.76861	9.19723	18.0387	6.10956e-08	1.1994e-05	9.12083	NC_009004.1	RefSeq	863245	864177	+	LLMG_RS04560;llmg_0893;	LLMG_RS04560	llm00240, llm00250	Pyrimidine metabolism , Alanine, aspartate and glutamate metabolism	transcript_id gene918; gene_id gene918; gene_name LLMG_RS04560; Dbxref Genbank:WP_011834851.1; Name WP_011834851.1; gbkey CDS; inference COORDINATES: similar to AA sequence:RefSeq:NP_267758.1; product aspartate carbamoyltransferase; transl_table 11; gbkey Gene; gene_biotype protein_coding; locus_tag LLMG_RS04560; old_locus_tag llmg_0893; protein_id WP_011834851.1;
llmg_0894	gene919	3.55541	9.44527	18.3888	5.22843e-08	1.1994e-05	9.27407	NC_009004.1	RefSeq	864265	865338	+	LLMG_RS04565;llmg_0894;	LLMG_RS04565	llm00240, llm00250	Pyrimidine metabolism , Alanine, aspartate and glutamate metabolism	transcript_id gene919; gene_id gene919; gene_name LLMG_RS04565; Dbxref Genbank:WP_011834852.1; Name WP_011834852.1; gbkey CDS; inference COORDINATES: similar to AA sequence:RefSeq:NP_267757.1; product carbamoyl-phosphate synthase small chain; transl_table 11; gbkey Gene; gene_biotype protein_coding; locus_tag LLMG_RS04565; old_locus_tag llmg_0894; protein_id WP_011834852.1;
llmg_1107	gene1127	2.99324	7.75323	17.5091	7.77571e-08	1.1994e-05	8.88598	NC_009004.1	RefSeq	1068466	1069179	+	LLMG_RS05620;llmg_1107;	LLMG_RS05620	llm00240	Pyrimidine metabolism	transcript_id gene1127; gene_id gene1127; gene_name LLMG_RS05620; Dbxref Genbank:WP_011835015.1; Name WP_011835015.1; gbkey CDS; inference COORDINATES: similar to AA sequence:RefSeq:NP_267501.1; product orotidine-5'-phosphate decarboxylase; transl_table 11; gbkey Gene; gene_biotype protein_coding; locus_tag LLMG_RS05620; old_locus_tag llmg_1107; protein_id WP_011835015.1;
llmg_1508	gene1523	3.94786	8.85764	17.8097	6.77518e-08	1.1994e-05	9.01638	NC_009004.1	RefSeq	1482282	1483553	-	LLMG_RS07600;llmg_1508;	LLMG_RS07600	llm00240	Pyrimidine metabolism	transcript_id gene1523; gene_id gene1523; gene_name LLMG_RS07600; Dbxref Genbank:WP_011835353.1; Name WP_011835353.1; gbkey CDS; inference COORDINATES: similar to AA sequence:RefSeq:WP_031296484.1; product dihydroorotase; transl_table 11; gbkey Gene; gene_biotype protein_coding; locus_tag LLMG_RS07600; old_locus_tag llmg_1508; protein_id WP_011835353.1;
llmg_2382	gene2388	-3.40619	9.67106	-17.9884	6.24927e-08	1.1994e-05	9.11436	NC_009004.1	RefSeq	2325285	2325911	-	LLMG_RS11940;llmg_2382;	LLMG_RS11940	llm03010	Ribosome	transcript_id gene2388; gene_id gene2388; gene_name LLMG_RS11940; Dbxref Genbank:WP_011836027.1; Name WP_011836027.1; gbkey CDS; inference COORDINATES: similar to AA sequence:RefSeq:NP_268255.1; product 50S ribosomal protein L4; transl_table 11; gbkey Gene; gene_biotype protein_coding; locus_tag LLMG_RS11940; old_locus_tag llmg_2382; protein_id WP_011836027.1;
llmg_0372	gene384	4.07899	9.63169	16.9068	1.03175e-07	1.30462e-05	8.60878	NC_009004.1	RefSeq	363700	365292	+	LLMG_RS01910;llmg_0372;	LLMG_RS01910	llm00250	Alanine, aspartate and glutamate metabolism	transcript_id gene384; gene_id gene384; gene_name LLMG_RS01910; Dbxref Genbank:WP_011834427.1; Name WP_011834427.1; gbkey CDS; inference COORDINATES: similar to AA sequence:RefSeq:NP_266508.1; product asparagine synthase B; transl_table 11; gbkey Gene; gene_biotype protein_coding; locus_tag LLMG_RS01910; old_locus_tag llmg_0372; protein_id WP_011834427.1;
llmg_1089	gene1109	3.36214	10.4094	16.9433	1.01392e-07	1.30462e-05	8.61943	NC_009004.1	RefSeq	1046961	1050155	+	LLMG_RS05530;llmg_1089;	LLMG_RS05530	llm00240, llm00250	Pyrimidine metabolism , Alanine, aspartate and glutamate metabolism	transcript_id gene1109; gene_id gene1109; gene_name LLMG_RS05530; Dbxref Genbank:WP_011834997.1; Name WP_011834997.1; gbkey CDS; inference COORDINATES: similar to AA sequence:RefSeq:NP_267519.1; product carbamoyl-phosphate synthase large chain; transl_table 11; gbkey Gene; gene_biotype protein_coding; locus_tag LLMG_RS05530; old_locus_tag llmg_1089; protein_id WP_011834997.1;
llmg_1216	gene1232	-3.40779	8.05571	-16.5186	1.24441e-07	1.30462e-05	8.43182	NC_009004.1	RefSeq	1184278	1185030	+	LLMG_RS06145;llmg_1216;	LLMG_RS06145	llm00730	Thiamine metabolism	transcript_id gene1232; gene_id gene1232; gene_name LLMG_RS06145; Dbxref Genbank:WP_011835107.1; Name WP_011835107.1; gbkey CDS; inference COORDINATES: similar to AA sequence:RefSeq:WP_011676189.1; product hydroxyethylthiazole kinase; transl_table 11; gbkey Gene; gene_biotype protein_coding; locus_tag LLMG_RS06145; old_locus_tag llmg_1216; protein_id WP_011835107.1;
llmg_2373	gene2379	-3.32377	9.10106	-16.6522	1.16613e-07	1.30462e-05	8.49571	NC_009004.1	RefSeq	2321381	2321749	-	LLMG_RS11895;llmg_2373;	LLMG_RS11895	llm03010	Ribosome	transcript_id gene2379; gene_id gene2379; gene_name LLMG_RS11895; Dbxref Genbank:WP_003129953.1; Name WP_003129953.1; gbkey CDS; inference COORDINATES: similar to AA sequence:RefSeq:NP_268246.1; product 50S ribosomal protein L14; transl_table 11; gbkey Gene; gene_biotype protein_coding; locus_tag LLMG_RS11895; old_locus_tag llmg_2373; protein_id WP_003129953.1;
llmg_2375	gene2381	-3.118	8.31677	-16.6894	1.14537e-07	1.30462e-05	8.51445	NC_009004.1	RefSeq	2322053	2322262	-	LLMG_RS11905;llmg_2375;	LLMG_RS11905	llm03010	Ribosome	transcript_id gene2381; gene_id gene2381; gene_name LLMG_RS11905; Dbxref Genbank:WP_003129957.1; Name WP_003129957.1; gbkey CDS; inference COORDINATES: similar to AA sequence:RefSeq:NP_268248.1; product 50S ribosomal protein L29; transl_table 11; gbkey Gene; gene_biotype protein_coding; locus_tag LLMG_RS11905; old_locus_tag llmg_2375; protein_id WP_003129957.1;
llmg_2378	gene2384	-3.0312	10.5668	-16.4791	1.26867e-07	1.30462e-05	8.41283	NC_009004.1	RefSeq	2323345	2323692	-	LLMG_RS11920;llmg_2378;	LLMG_RS11920	llm03010	Ribosome	transcript_id gene2384; gene_id gene2384; gene_name LLMG_RS11920; Dbxref Genbank:WP_010906302.1; Name WP_010906302.1; gbkey CDS; inference COORDINATES: similar to AA sequence:RefSeq:NP_268251.1; product 50S ribosomal protein L22; transl_table 11; gbkey Gene; gene_biotype protein_coding; locus_tag LLMG_RS11920; old_locus_tag llmg_2378; protein_id WP_010906302.1;
llmg_2379	gene2385	-3.10487	10.2533	-16.7868	1.09282e-07	1.30462e-05	8.56109	NC_009004.1	RefSeq	2323708	2323986	-	LLMG_RS11925;llmg_2379;	LLMG_RS11925	llm03010	Ribosome	transcript_id gene2385; gene_id gene2385; gene_name LLMG_RS11925; Dbxref Genbank:WP_011677159.1; Name WP_011677159.1; gbkey CDS; inference COORDINATES: similar to AA sequence:RefSeq:WP_000533765.1; product 30S ribosomal protein S19; transl_table 11; gbkey Gene; gene_biotype protein_coding; locus_tag LLMG_RS11925; old_locus_tag llmg_2379; protein_id WP_011677159.1;
llmg_2380	gene2386	-3.38204	10.2077	-16.8653	1.05244e-07	1.30462e-05	8.5984	NC_009004.1	RefSeq	2324146	2324976	-	LLMG_RS11930;llmg_2380;	LLMG_RS11930	llm03010	Ribosome	transcript_id gene2386; gene_id gene2386; gene_name LLMG_RS11930; Dbxref Genbank:WP_011677160.1; Name WP_011677160.1; gbkey CDS; inference COORDINATES: similar to AA sequence:RefSeq:WP_019790357.1; product 50S ribosomal protein L2; transl_table 11; gbkey Gene; gene_biotype protein_coding; locus_tag LLMG_RS11930; old_locus_tag llmg_2380; protein_id WP_011677160.1;
llmg_0947	gene971	3.32299	7.87455	16.3552	1.34827e-07	1.30937e-05	8.34578	NC_009004.1	RefSeq	914269	915222	+	LLMG_RS04825;llmg_0947;	LLMG_RS04825	n	n	transcript_id gene971; gene_id gene971; gene_name LLMG_RS04825; Dbxref Genbank:WP_011834890.1; Name WP_011834890.1; gbkey CDS; inference COORDINATES: similar to AA sequence:RefSeq:WP_011834890.1; product LysR family transcriptional regulator; transl_table 11; gbkey Gene; gene_biotype protein_coding; locus_tag LLMG_RS04825; old_locus_tag llmg_0947; protein_id WP_011834890.1;
llmg_1531	gene1544	-2.9002	8.04608	-16.1758	1.47357e-07	1.30937e-05	8.25776	NC_009004.1	RefSeq	1502732	1503379	-	LLMG_RS07705;llmg_1531;	LLMG_RS07705	llm00740	Riboflavin metabolism	transcript_id gene1544; gene_id gene1544; gene_name LLMG_RS07705; Dbxref Genbank:WP_011835373.1; Name WP_011835373.1; gbkey CDS; inference COORDINATES: similar to AA sequence:RefSeq:WP_011835373.1; product riboflavin synthase; transl_table 11; gbkey Gene; gene_biotype protein_coding; locus_tag LLMG_RS07705; old_locus_tag llmg_1531; protein_id WP_011835373.1;
llmg_2374	gene2380	-3.11391	10.4519	-16.1548	1.48903e-07	1.30937e-05	8.25325	NC_009004.1	RefSeq	2321772	2322032	-	LLMG_RS11900;llmg_2374;	LLMG_RS11900	llm03010	Ribosome	transcript_id gene2380; gene_id gene2380; gene_name LLMG_RS11900; Dbxref Genbank:WP_003129955.1; Name WP_003129955.1; gbkey CDS; inference COORDINATES: similar to AA sequence:RefSeq:NP_268247.1; product 30S ribosomal protein S17; transl_table 11; gbkey Gene; gene_biotype protein_coding; locus_tag LLMG_RS11900; old_locus_tag llmg_2374; protein_id WP_003129955.1;
llmg_2381	gene2387	-2.96352	10.5915	-16.1702	1.47765e-07	1.30937e-05	8.26139	NC_009004.1	RefSeq	2324992	2325285	-	LLMG_RS11935;llmg_2381;	LLMG_RS11935	llm03010	Ribosome	transcript_id gene2387; gene_id gene2387; gene_name LLMG_RS11935; Dbxref Genbank:WP_011836026.1; Name WP_011836026.1; gbkey CDS; inference COORDINATES: similar to AA sequence:RefSeq:NP_268254.1; product 50S ribosomal protein L23; transl_table 11; gbkey Gene; gene_biotype protein_coding; locus_tag LLMG_RS11935; old_locus_tag llmg_2381; protein_id WP_011836026.1;
llmg_2384	gene2390	-3.15767	9.25789	-16.0893	1.53856e-07	1.30937e-05	8.21521	NC_009004.1	RefSeq	2326579	2326887	-	LLMG_RS11950;llmg_2384;	LLMG_RS11950	llm03010	Ribosome	transcript_id gene2390; gene_id gene2390; gene_name LLMG_RS11950; Dbxref Genbank:WP_003129973.1; Name WP_003129973.1; gbkey CDS; inference COORDINATES: similar to AA sequence:RefSeq:NP_268257.1; product 30S ribosomal protein S10; transl_table 11; gbkey Gene; gene_biotype protein_coding; locus_tag LLMG_RS11950; old_locus_tag llmg_2384; protein_id WP_003129973.1;
llmg_2372	gene2378	-2.68586	10.3733	-15.7346	1.84086e-07	1.46638e-05	8.04062	NC_009004.1	RefSeq	2320942	2321247	-	LLMG_RS11890;llmg_2372;	LLMG_RS11890	llm03010	Ribosome	transcript_id gene2378; gene_id gene2378; gene_name LLMG_RS11890; Dbxref Genbank:WP_003129951.1; Name WP_003129951.1; gbkey CDS; inference COORDINATES: similar to AA sequence:RefSeq:WP_011921687.1; product 50S ribosomal protein L24; transl_table 11; gbkey Gene; gene_biotype protein_coding; locus_tag LLMG_RS11890; old_locus_tag llmg_2372; protein_id WP_003129951.1;
llmg_2383	gene2389	-3.05171	10.6516	-15.7335	1.84188e-07	1.46638e-05	8.04252	NC_009004.1	RefSeq	2325937	2326560	-	LLMG_RS11945;llmg_2383;	LLMG_RS11945	llm03010	Ribosome	transcript_id gene2389; gene_id gene2389; gene_name LLMG_RS11945; Dbxref Genbank:WP_011836028.1; Name WP_011836028.1; gbkey CDS; inference COORDINATES: similar to AA sequence:RefSeq:NP_268256.1; product 50S ribosomal protein L3; transl_table 11; gbkey Gene; gene_biotype protein_coding; locus_tag LLMG_RS11945; old_locus_tag llmg_2383; protein_id WP_011836028.1;
llmg_1569	gene1581	-2.99887	7.61064	-15.4502	2.13147e-07	1.6439e-05	7.8834	NC_009004.1	RefSeq	1542661	1543578	-	LLMG_RS07905;llmg_1569;	LLMG_RS07905	llm00051	Fructose and mannose metabolism	transcript_id gene1581; gene_id gene1581; gene_name pfkB; Dbxref Genbank:WP_011835403.1; Name WP_011835403.1; gbkey CDS; inference COORDINATES: similar to AA sequence:RefSeq:NP_267114.1; product 1-phosphofructokinase; transl_table 11; Name pfkB; gbkey Gene; gene_biotype protein_coding; locus_tag LLMG_RS07905; old_locus_tag llmg_1569; protein_id WP_011835403.1;
llmg_2310	gene2316	-2.7344	9.73127	-15.3481	2.2481e-07	1.6813e-05	7.84461	NC_009004.1	RefSeq	2259497	2260441	-	LLMG_RS11580;llmg_2310;	LLMG_RS11580	llm00220, llm00230, llm00910	Arginine biosynthesis , Purine metabolism , Nitrogen metabolism	transcript_id gene2316; gene_id gene2316; gene_name arcC; Dbxref Genbank:WP_011835983.1; Name WP_011835983.1; gbkey CDS; inference COORDINATES: similar to AA sequence:RefSeq:NP_268191.1; product carbamate kinase; transl_table 11; Name arcC; gbkey Gene; gene_biotype protein_coding; locus_tag LLMG_RS11580; old_locus_tag llmg_2310; protein_id WP_011835983.1;
llmg_1108	gene1128	3.22815	6.83523	15.228	2.39447e-07	1.73811e-05	7.78083	NC_009004.1	RefSeq	1069181	1069639	+	LLMG_RS05625;llmg_1108;	LLMG_RS05625	n	n	transcript_id gene1128; gene_id gene1128; gene_name LLMG_RS05625; Dbxref Genbank:WP_011835016.1; Name WP_011835016.1; gbkey CDS; inference COORDINATES: similar to AA sequence:RefSeq:WP_011835016.1; product hypothetical protein; transl_table 11; gbkey Gene; gene_biotype protein_coding; locus_tag LLMG_RS05625; old_locus_tag llmg_1108; protein_id WP_011835016.1;
llmg_2427	gene2437	2.96066	7.54978	15.0495	2.63197e-07	1.85591e-05	7.68777	NC_009004.1	RefSeq	2376782	2377273	-	LLMG_RS12190;llmg_2427;	LLMG_RS12190	llm02020, llm02024	Two-component system , Quorum sensing	transcript_id gene2437; gene_id gene2437; gene_name LLMG_RS12190; Dbxref Genbank:WP_011836065.1; Name WP_011836065.1; gbkey CDS; inference COORDINATES: similar to AA sequence:RefSeq:WP_015082943.1; product sigma-70 family RNA polymerase sigma factor; transl_table 11; gbkey Gene; gene_biotype protein_coding; locus_tag LLMG_RS12190; old_locus_tag llmg_2427; protein_id WP_011836065.1;
llmg_0079	gene87	-2.94224	8.3879	-14.6495	3.26613e-07	2.12669e-05	7.44783	NC_009004.1	RefSeq	73937	74962	-	LLMG_RS00430;llmg_0079;	LLMG_RS00430	llm00970	Aminoacyl-tRNA biosynthesis	transcript_id gene87; gene_id gene87; gene_name trpS; Dbxref Genbank:WP_011834182.1; Name WP_011834182.1; gbkey CDS; inference COORDINATES: similar to AA sequence:RefSeq:NP_266222.1; product tryptophan--tRNA ligase; transl_table 11; Name trpS; gbkey Gene; gene_biotype protein_coding; locus_tag LLMG_RS00430; old_locus_tag llmg_0079; protein_id WP_011834182.1;
llmg_2376	gene2382	-3.16905	8.94045	-14.704	3.17045e-07	2.12669e-05	7.48258	NC_009004.1	RefSeq	2322262	2322675	-	LLMG_RS11910;llmg_2376;	LLMG_RS11910	llm03010	Ribosome	transcript_id gene2382; gene_id gene2382; gene_name LLMG_RS11910; Dbxref Genbank:WP_011677158.1; Name WP_011677158.1; gbkey CDS; inference COORDINATES: similar to AA sequence:RefSeq:NP_268249.1; product 50S ribosomal protein L16; transl_table 11; gbkey Gene; gene_biotype protein_coding; locus_tag LLMG_RS11910; old_locus_tag llmg_2376; protein_id WP_011677158.1;
llmg_2377	gene2383	-3.15934	10.8835	-14.6448	3.27448e-07	2.12669e-05	7.46817	NC_009004.1	RefSeq	2322679	2323332	-	LLMG_RS11915;llmg_2377;	LLMG_RS11915	llm03010	Ribosome	transcript_id gene2383; gene_id gene2383; gene_name LLMG_RS11915; Dbxref Genbank:WP_003129960.1; Name WP_003129960.1; gbkey CDS; inference COORDINATES: similar to AA sequence:RefSeq:WP_000529931.1; product 30S ribosomal protein S3; transl_table 11; gbkey Gene; gene_biotype protein_coding; locus_tag LLMG_RS11915; old_locus_tag llmg_2377; protein_id WP_003129960.1;
llmg_1105	gene1125	3.29631	7.43941	14.4649	3.61489e-07	2.24389e-05	7.37177	NC_009004.1	RefSeq	1066455	1067243	+	LLMG_RS05610;llmg_1105;	LLMG_RS05610	llm00240	Pyrimidine metabolism	transcript_id gene1125; gene_id gene1125; gene_name LLMG_RS05610; Dbxref Genbank:WP_011835013.1; Name WP_011835013.1; gbkey CDS; inference COORDINATES: similar to AA sequence:RefSeq:NP_267503.1; product dihydroorotate dehydrogenase; transl_table 11; gbkey Gene; gene_biotype protein_coding; locus_tag LLMG_RS05610; old_locus_tag llmg_1105; protein_id WP_011835013.1;
llmg_1829	gene1829	-2.23546	8.04369	-14.454	3.63677e-07	2.24389e-05	7.31937	NC_009004.1	RefSeq	1808919	1810583	+	LLMG_RS09160;llmg_1829;	LLMG_RS09160	llm00130	Ubiquinone and other terpenoid-quinone biosynthesis	transcript_id gene1829; gene_id gene1829; gene_name LLMG_RS09160; Dbxref Genbank:WP_011835600.1; Name WP_011835600.1; gbkey CDS; inference COORDINATES: similar to AA sequence:RefSeq:NP_266887.1; product 2-succinyl-5-enolpyruvyl-6-hydroxy-3-cyclohexene-1-carboxylate synthase; transl_table 11; gbkey Gene; gene_biotype protein_coding; locus_tag LLMG_RS09160; old_locus_tag llmg_1829; protein_id WP_01…
llmg_1754	gene1758	4.36451	6.61422	14.3026	3.95613e-07	2.3814e-05	7.2841	NC_009004.1	RefSeq	1739480	1740481	-	LLMG_RS08815;llmg_1754;	LLMG_RS08815	llm00220	Arginine biosynthesis	transcript_id gene1758; gene_id gene1758; gene_name argF; Dbxref Genbank:WP_011835541.1; Name WP_011835541.1; gbkey CDS; inference COORDINATES: similar to AA sequence:RefSeq:NP_266957.1; product ornithine carbamoyltransferase; transl_table 11; Name argF; gbkey Gene; gene_biotype protein_coding; locus_tag LLMG_RS08815; old_locus_tag llmg_1754; protein_id WP_011835541.1;
llmg_1294	gene1315	2.45757	6.47363	14.1623	4.28045e-07	2.45678e-05	7.20323	NC_009004.1	RefSeq	1263756	1264355	-	LLMG_RS06560;llmg_1294;	LLMG_RS06560	llm00340	Histidine metabolism	transcript_id gene1315; gene_id gene1315; gene_name LLMG_RS06560; Dbxref Genbank:WP_011835171.1; Name WP_011835171.1; gbkey CDS; inference COORDINATES: similar to AA sequence:RefSeq:WP_011676150.1; product imidazoleglycerol-phosphate dehydratase; transl_table 11; gbkey Gene; gene_biotype protein_coding; locus_tag LLMG_RS06560; old_locus_tag llmg_1294; protein_id WP_011835171.1;
llmg_2365	gene2372	-2.89004	9.69628	-14.1758	4.24802e-07	2.45678e-05	7.1761	NC_009004.1	RefSeq	2317447	2317794	-	LLMG_RS11860;llmg_2365;	LLMG_RS11860	llm03010	Ribosome	transcript_id gene2372; gene_id gene2372; gene_name LLMG_RS11860; Dbxref Genbank:WP_011677153.1; Name WP_011677153.1; gbkey CDS; inference COORDINATES: similar to AA sequence:RefSeq:WP_018374469.1; product 50S ribosomal protein L18; transl_table 11; gbkey Gene; gene_biotype protein_coding; locus_tag LLMG_RS11860; old_locus_tag llmg_2365; protein_id WP_011677153.1;
llmg_1293	gene1314	2.45713	7.19733	14.08	4.48439e-07	2.51533e-05	7.14727	NC_009004.1	RefSeq	1262971	1263759	-	LLMG_RS06555;llmg_1293;	LLMG_RS06555	n	n	transcript_id gene1314; gene_id gene1314; gene_name LLMG_RS06555; Dbxref Genbank:WP_011835170.1; Name WP_011835170.1; gbkey CDS; inference COORDINATES: similar to AA sequence:RefSeq:NP_267367.1; product aminoglycoside 3'-phosphotransferase; transl_table 11; gbkey Gene; gene_biotype protein_coding; locus_tag LLMG_RS06555; old_locus_tag llmg_1293; protein_id WP_011835170.1;
llmg_1490	gene1506	-2.99055	8.34794	-13.9655	4.7864e-07	2.62507e-05	7.05297	NC_009004.1	RefSeq	1462457	1463989	-	LLMG_RS07515;llmg_1490;	LLMG_RS07515	n	n	transcript_id gene1506; gene_id gene1506; gene_name LLMG_RS07515; Dbxref Genbank:WP_011835338.1; Name WP_011835338.1; gbkey CDS; inference COORDINATES: similar to AA sequence:RefSeq:WP_015082368.1; product divalent metal cation transporter; transl_table 11; gbkey Gene; gene_biotype protein_coding; locus_tag LLMG_RS07515; old_locus_tag llmg_1490; protein_id WP_011835338.1;
llmg_0204	gene217	-3.41989	9.61611	-13.8039	5.25192e-07	2.64525e-05	6.96804	NC_009004.1	RefSeq	194276	194470	-	LLMG_RS01080;llmg_0204;	LLMG_RS01080	llm03010	Ribosome	transcript_id gene217; gene_id gene217; gene_name LLMG_RS01080; Dbxref Genbank:WP_003129776.1; Name WP_003129776.1; gbkey CDS; inference COORDINATES: similar to AA sequence:RefSeq:NP_266348.1; product 50S ribosomal protein L28; transl_table 11; gbkey Gene; gene_biotype protein_coding; locus_tag LLMG_RS01080; old_locus_tag llmg_0204; protein_id WP_003129776.1;
llmg_0299	gene314	2.10277	8.62524	13.8265	5.18393e-07	2.64525e-05	6.96783	NC_009004.1	RefSeq	289175	290209	+	LLMG_RS01565;llmg_0299;	LLMG_RS01565	llm00230	Purine metabolism	transcript_id gene314; gene_id gene314; gene_name LLMG_RS01565; Dbxref Genbank:WP_011834368.1; Name WP_011834368.1; gbkey CDS; inference COORDINATES: similar to AA sequence:RefSeq:WP_003131714.1; product adenosine deaminase; transl_table 11; gbkey Gene; gene_biotype protein_coding; locus_tag LLMG_RS01565; old_locus_tag llmg_0299; protein_id WP_011834368.1;
llmg_0333	gene346	-3.8215	9.63738	-13.8165	5.2139e-07	2.64525e-05	6.9871	NC_009004.1	RefSeq	321464	321940	-	LLMG_RS01720;llmg_0333;	LLMG_RS01720	n	n	transcript_id gene346; gene_id gene346; gene_name LLMG_RS01720; Dbxref Genbank:WP_011834395.1; Name WP_011834395.1; gbkey CDS; inference COORDINATES: similar to AA sequence:RefSeq:NP_266472.1; product aminoacyl-tRNA deacylase; transl_table 11; gbkey Gene; gene_biotype protein_coding; locus_tag LLMG_RS01720; old_locus_tag llmg_0333; protein_id WP_011834395.1;
llmg_2371	gene2377	-2.78181	9.81069	-13.9066	4.95033e-07	2.64525e-05	7.02263	NC_009004.1	RefSeq	2320380	2320922	-	LLMG_RS11885;llmg_2371;	LLMG_RS11885	llm03010	Ribosome	transcript_id gene2377; gene_id gene2377; gene_name LLMG_RS11885; Dbxref Genbank:WP_003129948.1; Name WP_003129948.1; gbkey CDS; inference COORDINATES: similar to AA sequence:RefSeq:WP_018376779.1; product 50S ribosomal protein L5; transl_table 11; gbkey Gene; gene_biotype protein_coding; locus_tag LLMG_RS11885; old_locus_tag llmg_2371; protein_id WP_003129948.1;
llmg_1217	gene1233	-2.88826	7.99911	-13.759	5.39e-07	2.66051e-05	6.93216	NC_009004.1	RefSeq	1185043	1185843	+	LLMG_RS06150;llmg_1217;	LLMG_RS06150	llm00730	Thiamine metabolism	transcript_id gene1233; gene_id gene1233; gene_name thiD; Dbxref Genbank:WP_011835108.1; Name WP_011835108.1; gbkey CDS; inference COORDINATES: similar to AA sequence:RefSeq:NP_267419.1; product bifunctional hydroxymethylpyrimidine kinase/phosphomethylpyrimidine kinase; transl_table 11; Name thiD; gbkey Gene; gene_biotype protein_coding; locus_tag LLMG_RS06150; old_locus_tag llmg_1217; protein_id…
llmg_0945	gene970	2.90712	8.45438	13.6942	5.59654e-07	2.66412e-05	6.91716	NC_009004.1	RefSeq	913106	914185	+	LLMG_RS04820;llmg_0945;	LLMG_RS04820	n	n	transcript_id gene970; gene_id gene970; gene_name LLMG_RS04820; Dbxref Genbank:WP_011834889.1; Name WP_011834889.1; gbkey CDS; inference COORDINATES: similar to AA sequence:RefSeq:NP_267712.1; product oxidoreductase; transl_table 11; gbkey Gene; gene_biotype protein_coding; locus_tag LLMG_RS04820; old_locus_tag llmg_0945; protein_id WP_011834889.1;
llmg_1574	gene1586	-2.82597	9.85786	-13.6891	5.61322e-07	2.66412e-05	6.91523	NC_009004.1	RefSeq	1549632	1551455	-	LLMG_RS07930;llmg_1574;	LLMG_RS07930	llm03018	RNA degradation	transcript_id gene1586; gene_id gene1586; gene_name LLMG_RS07930; Dbxref Genbank:WP_011835408.1; Name WP_011835408.1; gbkey CDS; inference COORDINATES: similar to AA sequence:RefSeq:NP_267110.1; product molecular chaperone DnaK; transl_table 11; gbkey Gene; gene_biotype protein_coding; locus_tag LLMG_RS07930; old_locus_tag llmg_1574; protein_id WP_011835408.1;
llmg_2366	gene2373	-2.67262	9.77191	-13.6308	5.80741e-07	2.70428e-05	6.8538	NC_009004.1	RefSeq	2318063	2318599	-	LLMG_RS11865;llmg_2366;	LLMG_RS11865	llm03010	Ribosome	transcript_id gene2373; gene_id gene2373; gene_name LLMG_RS11865; Dbxref Genbank:WP_011836023.1; Name WP_011836023.1; gbkey CDS; inference COORDINATES: similar to AA sequence:RefSeq:NP_268240.1; product 50S ribosomal protein L6; transl_table 11; gbkey Gene; gene_biotype protein_coding; locus_tag LLMG_RS11865; old_locus_tag llmg_2366; protein_id WP_011836023.1;
llmg_1530	gene1543	-2.86238	8.91302	-13.459	6.42443e-07	2.78167e-05	6.74757	NC_009004.1	RefSeq	1501524	1502720	-	LLMG_RS07700;llmg_1530;	LLMG_RS07700	llm00740, llm00790	Riboflavin metabolism , Folate biosynthesis	transcript_id gene1543; gene_id gene1543; gene_name LLMG_RS07700; Dbxref Genbank:WP_011835372.1; Name WP_011835372.1; gbkey CDS; inference COORDINATES: similar to AA sequence:RefSeq:NP_267151.1; product bifunctional 3%2C4-dihydroxy-2-butanone-4-phosphate synthase/GTP cyclohydrolase II; transl_table 11; gbkey Gene; gene_biotype protein_coding; locus_tag LLMG_RS07700; old_locus_tag llmg_1530; prote…
llmg_1932	gene1931	2.36557	7.11854	13.5133	6.2218e-07	2.78167e-05	6.81295	NC_009004.1	RefSeq	1913487	1914266	-	LLMG_RS09670;llmg_1932;	LLMG_RS09670	n	n	transcript_id gene1931; gene_id gene1931; gene_name LLMG_RS09670; Dbxref Genbank:WP_011835679.1; Name WP_011835679.1; gbkey CDS; inference COORDINATES: similar to AA sequence:RefSeq:NP_267906.1; product ABC transporter ATP-binding protein; transl_table 11; gbkey Gene; gene_biotype protein_coding; locus_tag LLMG_RS09670; old_locus_tag llmg_1932; protein_id WP_011835679.1;
llmg_2474	gene2487	-3.06677	10.5865	-13.5025	6.26162e-07	2.78167e-05	6.80505	NC_009004.1	RefSeq	2431325	2431825	-	LLMG_RS12430;llmg_2474;	LLMG_RS12430	llm03030, llm03430, llm03440	DNA replication , Mismatch repair , Homologous recombination	transcript_id gene2487; gene_id gene2487; gene_name LLMG_RS12430; Dbxref Genbank:WP_011677241.1; Name WP_011677241.1; Note binds to single stranded DNA and may facilitate the binding and interaction of other proteins to DNA; gbkey CDS; inference COORDINATES: similar to AA sequence:RefSeq:NP_268347.1; product single-stranded DNA-binding protein; transl_table 11; gbkey Gene; gene_biotype protein_co…
LLMG_RS13185	gene1235	2.57567	7.09028	13.472	6.37529e-07	2.78167e-05	6.79602	NC_009004.1	RefSeq	1186675	1186806	+	LLMG_RS13185;	LLMG_RS13185	n	n	transcript_id gene1235; gene_id gene1235; gene_name LLMG_RS13185; Dbxref Genbank:WP_021037287.1; Name WP_021037287.1; gbkey CDS; inference COORDINATES: similar to AA sequence:RefSeq:WP_003130223.1; product teichoic acid D-Ala incorporation-associated protein DltX; transl_table 11; gbkey Gene; gene_biotype protein_coding; locus_tag LLMG_RS13185; protein_id WP_021037287.1;
llmg_0410	gene421	-2.34992	8.27373	-13.3506	6.85114e-07	2.86586e-05	6.65968	NC_009004.1	RefSeq	403761	404045	+	LLMG_RS02095;llmg_0410;	LLMG_RS02095	n	n	transcript_id gene421; gene_id gene421; gene_name LLMG_RS02095; Dbxref Genbank:WP_011834459.1; Name WP_011834459.1; gbkey CDS; inference COORDINATES: similar to AA sequence:RefSeq:NP_266549.1; product co-chaperone GroES; transl_table 11; gbkey Gene; gene_biotype protein_coding; locus_tag LLMG_RS02095; old_locus_tag llmg_0410; protein_id WP_011834459.1;
llmg_2313	gene2319	-3.16377	10.5509	-13.368	6.78046e-07	2.86586e-05	6.75019	NC_009004.1	RefSeq	2263401	2264633	-	LLMG_RS11595;llmg_2313;	LLMG_RS11595	llm00220	Arginine biosynthesis	transcript_id gene2319; gene_id gene2319; gene_name arcA; Dbxref Genbank:WP_011835985.1; Name WP_011835985.1; gbkey CDS; inference COORDINATES: similar to AA sequence:RefSeq:NP_268194.1; product arginine deiminase; transl_table 11; Name arcA; gbkey Gene; gene_biotype protein_coding; locus_tag LLMG_RS11595; old_locus_tag llmg_2313; protein_id WP_011835985.1;
llmg_1298	gene1320	2.4584	7.06992	13.1976	7.50862e-07	3.03363e-05	6.62202	NC_009004.1	RefSeq	1267458	1268528	-	LLMG_RS06585;llmg_1298;	LLMG_RS06585	llm00340, llm00350, llm00360, llm00400, llm00401	Histidine metabolism , Tyrosine metabolism , Phenylalanine metabolism , Phenylalanine, tyrosine and tryptophan biosynthesis , Novobiocin biosynthesis	transcript_id gene1320; gene_id gene1320; gene_name LLMG_RS06585; Dbxref Genbank:WP_011835175.1; Name WP_011835175.1; gbkey CDS; inference COORDINATES: similar to AA sequence:RefSeq:WP_014572633.1; product histidinol-phosphate aminotransferase; transl_table 11; gbkey Gene; gene_biotype protein_coding; locus_tag LLMG_RS06585; old_locus_tag llmg_1298; protein_id WP_011835175.1;
llmg_1532	gene1545	-2.59281	9.14091	-13.1729	7.62096e-07	3.03363e-05	6.57337	NC_009004.1	RefSeq	1503379	1504467	-	LLMG_RS07710;llmg_1532;	LLMG_RS07710	llm00740, llm02024	Riboflavin metabolism , Quorum sensing	transcript_id gene1545; gene_id gene1545; gene_name ribD; Dbxref Genbank:WP_011835374.1; Name WP_011835374.1; gbkey CDS; inference COORDINATES: similar to AA sequence:RefSeq:NP_267149.1; product bifunctional diaminohydroxyphosphoribosylaminopyrimidine deaminase/5-amino-6-(5-phosphoribosylamino)uracil reductase RibD; transl_table 11; Name ribD; gbkey Gene; gene_biotype protein_coding; locus_tag LL…
llmg_2557	gene2580	-2.72667	9.44897	-13.194	7.52465e-07	3.03363e-05	6.57783	NC_009004.1	RefSeq	2516765	2517232	-	LLMG_RS12895;llmg_2557;	LLMG_RS12895	llm03010	Ribosome	transcript_id gene2580; gene_id gene2580; gene_name LLMG_RS12895; Dbxref Genbank:WP_003129876.1; Name WP_003129876.1; gbkey CDS; inference COORDINATES: similar to AA sequence:RefSeq:NP_268418.1; product 30S ribosomal protein S7; transl_table 11; gbkey Gene; gene_biotype protein_coding; locus_tag LLMG_RS12895; old_locus_tag llmg_2557; protein_id WP_003129876.1;
llmg_0565	gene589	2.55519	8.63567	13.1427	7.76126e-07	3.04044e-05	6.56691	NC_009004.1	RefSeq	557905	559002	+	LLMG_RS02940;llmg_0565;	LLMG_RS02940	llm00260, llm00680, llm00750	Glycine, serine and threonine metabolism , Methane metabolism , Vitamin B6 metabolism	transcript_id gene589; gene_id gene589; gene_name LLMG_RS02940; Dbxref Genbank:WP_011834591.1; Name WP_011834591.1; gbkey CDS; inference COORDINATES: similar to AA sequence:RefSeq:NP_266759.1; product phosphoserine aminotransferase; transl_table 11; gbkey Gene; gene_biotype protein_coding; locus_tag LLMG_RS02940; old_locus_tag llmg_0565; protein_id WP_011834591.1;
llmg_1221	gene1238	2.42289	9.21073	13.0601	8.15953e-07	3.14652e-05	6.50706	NC_009004.1	RefSeq	1189589	1189828	+	LLMG_RS06170;llmg_1221;	LLMG_RS06170	llm00473, llm02020	D-Alanine metabolism , Two-component system	transcript_id gene1238; gene_id gene1238; gene_name LLMG_RS06170; Dbxref Genbank:WP_011676184.1; Name WP_011676184.1; gbkey CDS; inference COORDINATES: similar to AA sequence:RefSeq:NP_267415.1; product D-alanine--poly(phosphoribitol) ligase subunit 2; transl_table 11; gbkey Gene; gene_biotype protein_coding; locus_tag LLMG_RS06170; old_locus_tag llmg_1221; protein_id WP_011676184.1;
llmg_0566	gene590	2.00957	8.63781	12.9771	8.58288e-07	3.20948e-05	6.44259	NC_009004.1	RefSeq	558999	560195	+	LLMG_RS02945;llmg_0566;	LLMG_RS02945	llm00260, llm00680	Glycine, serine and threonine metabolism , Methane metabolism	transcript_id gene590; gene_id gene590; gene_name LLMG_RS02945; Dbxref Genbank:WP_011834592.1; Name WP_011834592.1; gbkey CDS; inference COORDINATES: similar to AA sequence:RefSeq:WP_011675605.1; product 3-phosphoglycerate dehydrogenase; transl_table 11; gbkey Gene; gene_biotype protein_coding; locus_tag LLMG_RS02945; old_locus_tag llmg_0566; protein_id WP_011834592.1;
llmg_1030	gene1051	-2.37472	8.25414	-12.9883	8.52444e-07	3.20948e-05	6.43635	NC_009004.1	RefSeq	994809	996179	+	LLMG_RS05235;llmg_1030;	LLMG_RS05235	llm00400, llm02024	Phenylalanine, tyrosine and tryptophan biosynthesis , Quorum sensing	transcript_id gene1051; gene_id gene1051; gene_name LLMG_RS05235; Dbxref Genbank:WP_011834957.1; Name WP_011834957.1; gbkey CDS; inference COORDINATES: similar to AA sequence:RefSeq:NP_267626.1; product anthranilate synthase component I; transl_table 11; gbkey Gene; gene_biotype protein_coding; locus_tag LLMG_RS05235; old_locus_tag llmg_1030; protein_id WP_011834957.1;
llmg_0328	gene341	2.69462	7.52642	12.9469	8.74306e-07	3.22058e-05	6.4688	NC_009004.1	RefSeq	316793	317443	+	LLMG_RS01695;llmg_0328;	LLMG_RS01695	n	n	transcript_id gene341; gene_id gene341; gene_name LLMG_RS01695; Dbxref Genbank:WP_011834390.1; Name WP_011834390.1; gbkey CDS; inference COORDINATES: similar to AA sequence:RefSeq:WP_011834390.1; product hypothetical protein; transl_table 11; gbkey Gene; gene_biotype protein_coding; locus_tag LLMG_RS01695; old_locus_tag llmg_0328; protein_id WP_011834390.1;
llmg_0739	gene769	-2.05677	7.49193	-12.8448	9.30971e-07	3.37888e-05	6.33615	NC_009004.1	RefSeq	720962	722191	-	LLMG_RS03820;llmg_0739;	LLMG_RS03820	llm02010	ABC transporters	transcript_id gene769; gene_id gene769; gene_name LLMG_RS03820; Dbxref Genbank:WP_011834726.1; Name WP_011834726.1; gbkey CDS; inference COORDINATES: similar to AA sequence:RefSeq:WP_011834726.1; product maltose ABC transporter substrate-binding protein; transl_table 11; gbkey Gene; gene_biotype protein_coding; locus_tag LLMG_RS03820; old_locus_tag llmg_0739; protein_id WP_011834726.1;
llmg_0643	gene669	-2.68193	9.81217	-12.7665	9.77178e-07	3.48333e-05	6.36183	NC_009004.1	RefSeq	637215	639971	+	LLMG_RS03350;llmg_0643;	LLMG_RS03350	n	n	transcript_id gene669; gene_id gene669; gene_name LLMG_RS03350; Dbxref Genbank:WP_011834651.1; Name WP_011834651.1; gbkey CDS; inference COORDINATES: similar to AA sequence:RefSeq:NP_266834.1; product magnesium-transporting ATPase; transl_table 11; gbkey Gene; gene_biotype protein_coding; locus_tag LLMG_RS03350; old_locus_tag llmg_0643; protein_id WP_011834651.1;
llmg_1758	gene1762	3.65634	7.43029	12.7488	9.87979e-07	3.48333e-05	6.34539	NC_009004.1	RefSeq	1743705	1744727	-	LLMG_RS08835;llmg_1758;	LLMG_RS08835	llm00220	Arginine biosynthesis	transcript_id gene1762; gene_id gene1762; gene_name LLMG_RS08835; Dbxref Genbank:WP_011835545.1; Name WP_011835545.1; gbkey CDS; inference COORDINATES: similar to AA sequence:RefSeq:NP_266953.1; product N-acetyl-gamma-glutamyl-phosphate reductase; transl_table 11; gbkey Gene; gene_biotype protein_coding; locus_tag LLMG_RS08835; old_locus_tag llmg_1758; protein_id WP_011835545.1;
llmg_2309	gene2315	-2.95904	9.98662	-12.6371	1.05926e-06	3.68203e-05	6.29418	NC_009004.1	RefSeq	2258520	2259464	-	LLMG_RS11575;llmg_2309;	LLMG_RS11575	llm00220, llm00230, llm00910	Arginine biosynthesis , Purine metabolism , Nitrogen metabolism	transcript_id gene2315; gene_id gene2315; gene_name arcC; Dbxref Genbank:WP_011835982.1; Name WP_011835982.1; gbkey CDS; inference COORDINATES: similar to AA sequence:RefSeq:NP_268190.1; product carbamate kinase; transl_table 11; Name arcC; gbkey Gene; gene_biotype protein_coding; locus_tag LLMG_RS11575; old_locus_tag llmg_2309; protein_id WP_011835982.1;
llmg_1106	gene1126	2.47061	7.03165	12.6132	1.07526e-06	3.68576e-05	6.25831	NC_009004.1	RefSeq	1067401	1068336	+	LLMG_RS05615;llmg_1106;	LLMG_RS05615	llm00240	Pyrimidine metabolism	transcript_id gene1126; gene_id gene1126; gene_name LLMG_RS05615; Dbxref Genbank:WP_011835014.1; Name WP_011835014.1; gbkey CDS; inference COORDINATES: similar to AA sequence:RefSeq:NP_267502.1; product dihydroorotate dehydrogenase; transl_table 11; gbkey Gene; gene_biotype protein_coding; locus_tag LLMG_RS05615; old_locus_tag llmg_1106; protein_id WP_011835014.1;
llmg_2364	gene2371	-2.82059	8.87337	-12.5653	1.10812e-06	3.69574e-05	6.17245	NC_009004.1	RefSeq	2316922	2317428	-	LLMG_RS11855;llmg_2364;	LLMG_RS11855	llm03010	Ribosome	transcript_id gene2371; gene_id gene2371; gene_name LLMG_RS11855; Dbxref Genbank:WP_011836022.1; Name WP_011836022.1; gbkey CDS; inference COORDINATES: similar to AA sequence:RefSeq:NP_268238.1; product 30S ribosomal protein S5; transl_table 11; gbkey Gene; gene_biotype protein_coding; locus_tag LLMG_RS11855; old_locus_tag llmg_2364; protein_id WP_011836022.1;
llmg_2558	gene2581	-2.53361	10.5698	-12.5794	1.09834e-06	3.69574e-05	6.22658	NC_009004.1	RefSeq	2517251	2517664	-	LLMG_RS12900;llmg_2558;	LLMG_RS12900	llm03010	Ribosome	transcript_id gene2581; gene_id gene2581; gene_name LLMG_RS12900; Dbxref Genbank:WP_003129874.1; Name WP_003129874.1; gbkey CDS; inference COORDINATES: similar to AA sequence:RefSeq:WP_003129874.1; product 30S ribosomal protein S12; transl_table 11; gbkey Gene; gene_biotype protein_coding; locus_tag LLMG_RS12900; old_locus_tag llmg_2558; protein_id WP_003129874.1;
llmg_1295	gene1316	2.2571	6.94005	12.4158	1.21807e-06	4.00827e-05	6.12452	NC_009004.1	RefSeq	1264356	1265663	-	LLMG_RS06565;llmg_1295;	LLMG_RS06565	llm00340	Histidine metabolism	transcript_id gene1316; gene_id gene1316; gene_name hisD; Dbxref Genbank:WP_011835172.1; Name WP_011835172.1; gbkey CDS; inference COORDINATES: similar to AA sequence:RefSeq:WP_011835172.1; product histidinol dehydrogenase; transl_table 11; Name hisD; gbkey Gene; gene_biotype protein_coding; locus_tag LLMG_RS06565; old_locus_tag llmg_1295; protein_id WP_011835172.1;
llmg_1830	gene1830	-1.7516	7.42878	-12.3199	1.29503e-06	4.20544e-05	5.99326	NC_009004.1	RefSeq	1810573	1811388	+	LLMG_RS09165;llmg_1830;	LLMG_RS09165	llm00130	Ubiquinone and other terpenoid-quinone biosynthesis	transcript_id gene1830; gene_id gene1830; gene_name menH; Dbxref Genbank:WP_011835601.1; Name WP_011835601.1; gbkey CDS; inference COORDINATES: similar to AA sequence:RefSeq:WP_014572947.1; product 2-succinyl-6-hydroxy-2%2C4-cyclohexadiene-1-carboxylate synthase; transl_table 11; Name menH; gbkey Gene; gene_biotype protein_coding; locus_tag LLMG_RS09165; old_locus_tag llmg_1830; protein_id WP_011…
llmg_1207	gene1225	-3.40095	10.2826	-12.2679	1.33905e-06	4.24147e-05	6.00712	NC_009004.1	RefSeq	1175758	1176273	+	LLMG_RS06105;llmg_1207;	LLMG_RS06105	llm03010	Ribosome	transcript_id gene1225; gene_id gene1225; gene_name LLMG_RS06105; Dbxref Genbank:WP_011676195.1; Name WP_011676195.1; gbkey CDS; inference COORDINATES: similar to AA sequence:RefSeq:NP_267425.1; product 50S ribosomal protein L10; transl_table 11; gbkey Gene; gene_biotype protein_coding; locus_tag LLMG_RS06105; old_locus_tag llmg_1207; protein_id WP_011676195.1;
llmg_1289	gene1310	2.06475	7.32208	12.2662	1.3405e-06	4.24147e-05	6.00328	NC_009004.1	RefSeq	1260189	1260827	-	LLMG_RS06535;llmg_1289;	LLMG_RS06535	llm00340	Histidine metabolism	transcript_id gene1310; gene_id gene1310; gene_name LLMG_RS06535; Dbxref Genbank:WP_011835166.1; Name WP_011835166.1; gbkey CDS; inference COORDINATES: similar to AA sequence:RefSeq:NP_267371.1; product bifunctional phosphoribosyl-AMP cyclohydrolase/phosphoribosyl-ATP diphosphatase HisIE; transl_table 11; gbkey Gene; gene_biotype protein_coding; locus_tag LLMG_RS06535; old_locus_tag llmg_1289; pr…
llmg_2475	gene2488	-2.90845	9.80569	-12.245	1.35895e-06	4.24541e-05	5.97155	NC_009004.1	RefSeq	2431855	2432148	-	LLMG_RS12435;llmg_2475;	LLMG_RS12435	llm03010	Ribosome	transcript_id gene2488; gene_id gene2488; gene_name LLMG_RS12435; Dbxref Genbank:WP_011677242.1; Name WP_011677242.1; gbkey CDS; inference COORDINATES: similar to AA sequence:RefSeq:NP_268348.1; product 30S ribosomal protein S6; transl_table 11; gbkey Gene; gene_biotype protein_coding; locus_tag LLMG_RS12435; old_locus_tag llmg_2475; protein_id WP_011677242.1;
llmg_1208	gene1226	-3.50515	9.54029	-12.1914	1.40675e-06	4.33983e-05	5.94366	NC_009004.1	RefSeq	1176343	1176708	+	LLMG_RS06110;llmg_1208;	LLMG_RS06110	llm03010	Ribosome	transcript_id gene1226; gene_id gene1226; gene_name LLMG_RS06110; Dbxref Genbank:WP_011676194.1; Name WP_011676194.1; gbkey CDS; inference COORDINATES: similar to AA sequence:RefSeq:WP_018371186.1; product 50S ribosomal protein L7/L12; transl_table 11; gbkey Gene; gene_biotype protein_coding; locus_tag LLMG_RS06110; old_locus_tag llmg_1208; protein_id WP_011676194.1;
llmg_2473	gene2486	-3.32619	9.05062	-12.0417	1.55075e-06	4.72499e-05	5.84021	NC_009004.1	RefSeq	2430908	2431153	-	LLMG_RS12425;llmg_2473;	LLMG_RS12425	llm03010	Ribosome	transcript_id gene2486; gene_id gene2486; gene_name rpsR; Dbxref Genbank:WP_003131952.1; Name WP_003131952.1; gbkey CDS; inference COORDINATES: similar to AA sequence:RefSeq:NP_268346.1; product 30S ribosomal protein S18; transl_table 11; Name rpsR; gbkey Gene; gene_biotype protein_coding; locus_tag LLMG_RS12425; old_locus_tag llmg_2473; protein_id WP_003131952.1;
llmg_1933	gene1932	2.24096	7.11624	11.9407	1.65707e-06	4.9285e-05	5.79716	NC_009004.1	RefSeq	1914460	1914816	-	LLMG_RS09675;llmg_1933;	LLMG_RS09675	n	n	transcript_id gene1932; gene_id gene1932; gene_name LLMG_RS09675; Dbxref Genbank:WP_011676747.1; Name WP_011676747.1; gbkey CDS; inference COORDINATES: similar to AA sequence:RefSeq:NP_267907.1; product DUF1093 domain-containing protein; transl_table 11; gbkey Gene; gene_biotype protein_coding; locus_tag LLMG_RS09675; old_locus_tag llmg_1933; protein_id WP_011676747.1;
llmg_2035	gene2033	-2.90341	9.52256	-11.9403	1.65748e-06	4.9285e-05	5.79286	NC_009004.1	RefSeq	2018737	2020614	-	LLMG_RS10175;llmg_2035;	LLMG_RS10175	n	n	transcript_id gene2033; gene_id gene2033; gene_name LLMG_RS10175; Dbxref Genbank:WP_011835755.1; Name WP_011835755.1; gbkey CDS; inference COORDINATES: similar to AA sequence:RefSeq:NP_268004.1; product tRNA uridine-5-carboxymethylaminomethyl(34) synthesis enzyme MnmG; transl_table 11; gbkey Gene; gene_biotype protein_coding; locus_tag LLMG_RS10175; old_locus_tag llmg_2035; protein_id WP_01183575…
llmg_1720	gene1725	2.12206	7.06962	11.8639	1.74333e-06	5.12208e-05	5.76	NC_009004.1	RefSeq	1695684	1696400	-	LLMG_RS08650;llmg_1720;	LLMG_RS08650	llm00240	Pyrimidine metabolism	transcript_id gene1725; gene_id gene1725; gene_name LLMG_RS08650; Dbxref Genbank:WP_011835514.1; Name WP_011835514.1; gbkey CDS; inference COORDINATES: similar to AA sequence:RefSeq:NP_266995.1; product uridine phosphorylase; transl_table 11; gbkey Gene; gene_biotype protein_coding; locus_tag LLMG_RS08650; old_locus_tag llmg_1720; protein_id WP_011835514.1;
llmg_0118	gene127	1.96804	9.75255	11.796	1.8239e-06	5.16363e-05	5.64945	NC_009004.1	RefSeq	111440	112837	+	LLMG_RS00630;llmg_0118;	LLMG_RS00630	n	n	transcript_id gene127; gene_id gene127; gene_name LLMG_RS00630; Dbxref Genbank:WP_011834216.1; Name WP_011834216.1; gbkey CDS; inference COORDINATES: similar to AA sequence:RefSeq:NP_266267.1; product amino acid permease; transl_table 11; gbkey Gene; gene_biotype protein_coding; locus_tag LLMG_RS00630; old_locus_tag llmg_0118; protein_id WP_011834216.1;
llmg_0128	gene137	-2.03011	8.78781	-11.81	1.80692e-06	5.16363e-05	5.62703	NC_009004.1	RefSeq	123002	123301	-	LLMG_RS00685;llmg_0128;	LLMG_RS00685	n	n	transcript_id gene137; gene_id gene137; gene_name LLMG_RS00685; Dbxref Genbank:WP_011675168.1; Name WP_011675168.1; gbkey CDS; inference COORDINATES: similar to AA sequence:RefSeq:NP_266276.1; product YbaB/EbfC family nucleoid-associated protein; transl_table 11; gbkey Gene; gene_biotype protein_coding; locus_tag LLMG_RS00685; old_locus_tag llmg_0128; protein_id WP_011675168.1;
llmg_0728	gene758	-2.11845	10.2564	-11.8005	1.81839e-06	5.16363e-05	5.70365	NC_009004.1	RefSeq	710538	711350	-	LLMG_RS03760;llmg_0728;	LLMG_RS03760	llm00051, llm00520, llm02060	Fructose and mannose metabolism , Amino sugar and nucleotide sugar metabolism , Phosphotransferase system (PTS)	transcript_id gene758; gene_id gene758; gene_name LLMG_RS03760; Dbxref Genbank:WP_011834717.1; Name WP_011834717.1; gbkey CDS; inference COORDINATES: similar to AA sequence:RefSeq:NP_267863.1; product PTS mannose/fructose/sorbose transporter subunit IIC; transl_table 11; gbkey Gene; gene_biotype protein_coding; locus_tag LLMG_RS03760; old_locus_tag llmg_0728; protein_id WP_011834717.1;
llmg_1570	gene1582	-2.04277	7.43964	-11.7819	1.84116e-06	5.16363e-05	5.606	NC_009004.1	RefSeq	1543662	1544363	-	LLMG_RS07910;llmg_1570;	LLMG_RS07910	n	n	transcript_id gene1582; gene_id gene1582; gene_name LLMG_RS07910; Dbxref Genbank:WP_011835404.1; Name WP_011835404.1; gbkey CDS; inference COORDINATES: similar to AA sequence:RefSeq:NP_267113.1; product DeoR/GlpR transcriptional regulator; transl_table 11; gbkey Gene; gene_biotype protein_coding; locus_tag LLMG_RS07910; old_locus_tag llmg_1570; protein_id WP_011835404.1;
llmg_1946	gene1946	-2.22445	10.0798	-11.6306	2.03787e-06	5.65108e-05	5.56329	NC_009004.1	RefSeq	1927518	1928927	-	LLMG_RS09735;llmg_1946;	LLMG_RS09735	llm00190	Oxidative phosphorylation	transcript_id gene1946; gene_id gene1946; gene_name atpD; Dbxref Genbank:WP_014735119.1; Name WP_014735119.1; gbkey CDS; inference COORDINATES: similar to AA sequence:RefSeq:NP_267920.1; product ATP synthase subunit beta; transl_table 11; Name atpD; gbkey Gene; gene_biotype protein_coding; locus_tag LLMG_RS09735; old_locus_tag llmg_1946; protein_id WP_014735119.1;
llmg_0254	gene267	2.50213	6.66966	11.501	2.22522e-06	6.10205e-05	5.5022	NC_009004.1	RefSeq	240927	241601	+	LLMG_RS01330;llmg_0254;	LLMG_RS01330	llm00361, llm00625	Chlorocyclohexane and chlorobenzene degradation , Chloroalkane and chloroalkene degradation	transcript_id gene267; gene_id gene267; gene_name LLMG_RS01330; Dbxref Genbank:WP_011834334.1; Name WP_011834334.1; gbkey CDS; inference COORDINATES: similar to AA sequence:RefSeq:WP_011675279.1; product haloacid dehalogenase type II; transl_table 11; gbkey Gene; gene_biotype protein_coding; locus_tag LLMG_RS01330; old_locus_tag llmg_0254; protein_id WP_011834334.1;
llmg_1781	gene1784	-2.42575	8.9437	-11.3903	2.40046e-06	6.51025e-05	5.3405	NC_009004.1	RefSeq	1762172	1762606	-	LLMG_RS08935;llmg_1781;	LLMG_RS08935	llm00061, llm00780	Fatty acid biosynthesis , Biotin metabolism	transcript_id gene1784; gene_id gene1784; gene_name fabZ; Dbxref Genbank:WP_011835563.1; Name WP_011835563.1; gbkey CDS; inference COORDINATES: similar to AA sequence:RefSeq:NP_266933.1; product beta-hydroxyacyl-ACP dehydratase; transl_table 11; Name fabZ; gbkey Gene; gene_biotype protein_coding; locus_tag LLMG_RS08935; old_locus_tag llmg_1781; protein_id WP_011835563.1;
llmg_1218	gene1234	-2.65332	8.03464	-11.3739	2.42775e-06	6.51271e-05	5.34065	NC_009004.1	RefSeq	1185836	1186492	+	LLMG_RS06155;llmg_1218;	LLMG_RS06155	llm00730	Thiamine metabolism	transcript_id gene1234; gene_id gene1234; gene_name LLMG_RS06155; Dbxref Genbank:WP_011835109.1; Name WP_011835109.1; gbkey CDS; inference COORDINATES: similar to AA sequence:RefSeq:WP_014572663.1; product thiamine phosphate synthase; transl_table 11; gbkey Gene; gene_biotype protein_coding; locus_tag LLMG_RS06155; old_locus_tag llmg_1218; protein_id WP_011835109.1;
llmg_2357	gene2365	-2.31718	9.02321	-11.3516	2.46541e-06	6.54261e-05	5.3094	NC_009004.1	RefSeq	2313118	2313234	-	LLMG_RS11825;llmg_2357;	LLMG_RS11825	llm03010	Ribosome	transcript_id gene2365; gene_id gene2365; gene_name LLMG_RS11825; Dbxref Genbank:WP_001808836.1; Name WP_001808836.1; gbkey CDS; inference COORDINATES: similar to AA sequence:RefSeq:WP_013773089.1; product 50S ribosomal protein L36; transl_table 11; gbkey Gene; gene_biotype protein_coding; locus_tag LLMG_RS11825; old_locus_tag llmg_2357; protein_id WP_001808836.1;
llmg_1183	gene1200	2.27633	9.98102	11.3146	2.52926e-06	6.64064e-05	5.33489	NC_009004.1	RefSeq	1151292	1155761	+	LLMG_RS05990;llmg_1183;	LLMG_RS05990	llm00250, llm00910	Alanine, aspartate and glutamate metabolism , Nitrogen metabolism	transcript_id gene1200; gene_id gene1200; gene_name LLMG_RS05990; Dbxref Genbank:WP_011835084.1; Name WP_011835084.1; gbkey CDS; inference COORDINATES: similar to AA sequence:RefSeq:NP_267442.1; product glutamate synthase large subunit; transl_table 11; gbkey Gene; gene_biotype protein_coding; locus_tag LLMG_RS05990; old_locus_tag llmg_1183; protein_id WP_011835084.1;
llmg_2029	gene2028	-3.27099	7.76904	-11.2562	2.63372e-06	6.84212e-05	5.31521	NC_009004.1	RefSeq	2015238	2015597	-	LLMG_RS10150;llmg_2029;	LLMG_RS10150	llm03010	Ribosome	transcript_id gene2028; gene_id gene2028; gene_name LLMG_RS10150; Dbxref Genbank:WP_011835750.1; Name WP_011835750.1; gbkey CDS; inference COORDINATES: similar to AA sequence:RefSeq:WP_019723984.1; product 50S ribosomal protein L20; transl_table 11; gbkey Gene; gene_biotype protein_coding; locus_tag LLMG_RS10150; old_locus_tag llmg_2029; protein_id WP_011835750.1;
llmg_2370	gene2376	-2.83787	8.45006	-11.1802	2.777e-06	7.1392e-05	5.21619	NC_009004.1	RefSeq	2320176	2320361	-	LLMG_RS11880;llmg_2370;	LLMG_RS11880	llm03010	Ribosome	transcript_id gene2376; gene_id gene2376; gene_name LLMG_RS11880; Dbxref Genbank:WP_003129946.1; Name WP_003129946.1; gbkey CDS; inference COORDINATES: similar to AA sequence:RefSeq:WP_002946164.1; product 30S ribosomal protein S14 type Z; transl_table 11; gbkey Gene; gene_biotype protein_coding; locus_tag LLMG_RS11880; old_locus_tag llmg_2370; protein_id WP_003129946.1;
llmg_0729	gene759	-2.3889	10.8225	-11.1596	2.81746e-06	7.16855e-05	5.27377	NC_009004.1	RefSeq	711429	712418	-	LLMG_RS03765;llmg_0729;	LLMG_RS03765	llm00051, llm00520, llm02060	Fructose and mannose metabolism , Amino sugar and nucleotide sugar metabolism , Phosphotransferase system (PTS)	transcript_id gene759; gene_id gene759; gene_name LLMG_RS03765; Dbxref Genbank:WP_011834718.1; Name WP_011834718.1; gbkey CDS; inference COORDINATES: similar to AA sequence:RefSeq:NP_267862.1; product PTS mannose transporter subunit IIAB; transl_table 11; gbkey Gene; gene_biotype protein_coding; locus_tag LLMG_RS03765; old_locus_tag llmg_0729; protein_id WP_011834718.1;
llmg_1783	gene1786	-2.23998	9.64099	-11.0846	2.96978e-06	7.39005e-05	5.14301	NC_009004.1	RefSeq	1763207	1764436	-	LLMG_RS08945;llmg_1783;	LLMG_RS08945	llm00061, llm00780	Fatty acid biosynthesis , Biotin metabolism	transcript_id gene1786; gene_id gene1786; gene_name fabF; Dbxref Genbank:WP_011835565.1; Name WP_011835565.1; gbkey CDS; inference COORDINATES: similar to AA sequence:RefSeq:NP_266931.1; product beta-ketoacyl-[acyl-carrier-protein] synthase II; transl_table 11; Name fabF; gbkey Gene; gene_biotype protein_coding; locus_tag LLMG_RS08945; old_locus_tag llmg_1783; protein_id WP_011835565.1;
llmg_1784	gene1787	-2.2671	9.35631	-11.0729	2.99435e-06	7.39005e-05	5.11395	NC_009004.1	RefSeq	1764477	1765208	-	LLMG_RS08950;llmg_1784;	LLMG_RS08950	llm00061, llm00780	Fatty acid biosynthesis , Biotin metabolism	transcript_id gene1787; gene_id gene1787; gene_name fabG; Dbxref Genbank:WP_011835566.1; Name WP_011835566.1; gbkey CDS; inference COORDINATES: similar to AA sequence:RefSeq:NP_266930.1; product 3-oxoacyl-[acyl-carrier-protein] reductase; transl_table 11; Name fabG; gbkey Gene; gene_biotype protein_coding; locus_tag LLMG_RS08950; old_locus_tag llmg_1784; protein_id WP_011835566.1;
llmg_2355	gene2363	-2.31404	8.75173	-11.0805	2.97842e-06	7.39005e-05	5.10573	NC_009004.1	RefSeq	2312331	2312714	-	LLMG_RS11815;llmg_2355;	LLMG_RS11815	llm03010	Ribosome	transcript_id gene2363; gene_id gene2363; gene_name LLMG_RS11815; Dbxref Genbank:WP_010906297.1; Name WP_010906297.1; gbkey CDS; inference COORDINATES: similar to AA sequence:RefSeq:WP_003130556.1; product 30S ribosomal protein S11; transl_table 11; gbkey Gene; gene_biotype protein_coding; locus_tag LLMG_RS11815; old_locus_tag llmg_2355; protein_id WP_010906297.1;
llmg_1947	gene1947	-2.05998	10.2301	-11.0396	3.06557e-06	7.49093e-05	5.14041	NC_009004.1	RefSeq	1929099	1929968	-	LLMG_RS09740;llmg_1947;	LLMG_RS09740	llm00190	Oxidative phosphorylation	transcript_id gene1947; gene_id gene1947; gene_name LLMG_RS09740; Dbxref Genbank:WP_011835690.1; Name WP_011835690.1; gbkey CDS; inference COORDINATES: similar to AA sequence:RefSeq:NP_267921.1; product ATP synthase subunit gamma; transl_table 11; gbkey Gene; gene_biotype protein_coding; locus_tag LLMG_RS09740; old_locus_tag llmg_1947; protein_id WP_011835690.1;
llmg_1297	gene1319	2.16393	7.14994	10.9686	3.2241e-06	7.66303e-05	5.09135	NC_009004.1	RefSeq	1266502	1267458	-	LLMG_RS06580;llmg_1297;	LLMG_RS06580	llm00340	Histidine metabolism	transcript_id gene1319; gene_id gene1319; gene_name LLMG_RS06580; Dbxref Genbank:WP_011835174.1; Name WP_011835174.1; gbkey CDS; inference COORDINATES: similar to AA sequence:RefSeq:WP_011676153.1; product ATP phosphoribosyltransferase regulatory subunit; transl_table 11; gbkey Gene; gene_biotype protein_coding; locus_tag LLMG_RS06580; old_locus_tag llmg_1297; protein_id WP_011835174.1;
llmg_2030	gene2029	-3.10183	8.16143	-10.9711	3.2183e-06	7.66303e-05	5.08006	NC_009004.1	RefSeq	2015861	2016061	-	LLMG_RS10155;llmg_2030;	LLMG_RS10155	llm03010	Ribosome	transcript_id gene2029; gene_id gene2029; gene_name LLMG_RS10155; Dbxref Genbank:WP_011676854.1; Name WP_011676854.1; gbkey CDS; inference COORDINATES: similar to AA sequence:RefSeq:NP_268000.1; product 50S ribosomal protein L35; transl_table 11; gbkey Gene; gene_biotype protein_coding; locus_tag LLMG_RS10155; old_locus_tag llmg_2030; protein_id WP_011676854.1;
llmg_2169	gene2179	-1.88933	9.31157	-10.9663	3.22915e-06	7.66303e-05	5.03046	NC_009004.1	RefSeq	2136874	2138814	-	LLMG_RS10900;llmg_2169;	LLMG_RS10900	llm00970	Aminoacyl-tRNA biosynthesis	transcript_id gene2179; gene_id gene2179; gene_name LLMG_RS10900; Dbxref Genbank:WP_011835870.1; Name WP_011835870.1; gbkey CDS; inference COORDINATES: similar to AA sequence:RefSeq:NP_268068.1; product threonine--tRNA ligase; transl_table 11; gbkey Gene; gene_biotype protein_coding; locus_tag LLMG_RS10900; old_locus_tag llmg_2169; protein_id WP_011835870.1;
llmg_1945	gene1945	-2.12084	8.43384	-10.9098	3.36211e-06	7.90256e-05	4.96993	NC_009004.1	RefSeq	1926908	1927333	-	LLMG_RS09730;llmg_1945;	LLMG_RS09730	llm00190	Oxidative phosphorylation	transcript_id gene1945; gene_id gene1945; gene_name LLMG_RS09730; Dbxref Genbank:WP_011835688.1; Name WP_011835688.1; gbkey CDS; inference COORDINATES: similar to AA sequence:RefSeq:WP_004259148.1; product ATP synthase epsilon chain; transl_table 11; gbkey Gene; gene_biotype protein_coding; locus_tag LLMG_RS09730; old_locus_tag llmg_1945; protein_id WP_011835688.1;
llmg_1288	gene1309	2.00738	6.96029	10.8567	3.49238e-06	7.98073e-05	5.00918	NC_009004.1	RefSeq	1259403	1260188	-	LLMG_RS06530;llmg_1288;	LLMG_RS06530	llm00340	Histidine metabolism	transcript_id gene1309; gene_id gene1309; gene_name LLMG_RS06530; Dbxref Genbank:WP_011835165.1; Name WP_011835165.1; gbkey CDS; inference COORDINATES: similar to AA sequence:RefSeq:NP_267372.1; product PHP domain-containing protein; transl_table 11; gbkey Gene; gene_biotype protein_coding; locus_tag LLMG_RS06530; old_locus_tag llmg_1288; protein_id WP_011835165.1;
llmg_1831	gene1831	-2.29456	9.14843	-10.8619	3.4792e-06	7.98073e-05	4.95186	NC_009004.1	RefSeq	1811711	1812553	+	LLMG_RS09170;llmg_1831;	LLMG_RS09170	llm00130	Ubiquinone and other terpenoid-quinone biosynthesis	transcript_id gene1831; gene_id gene1831; gene_name LLMG_RS09170; Dbxref Genbank:WP_011675699.1; Name WP_011675699.1; gbkey CDS; inference COORDINATES: similar to AA sequence:RefSeq:NP_266885.1; product 1%2C4-dihydroxy-2-naphthoyl-CoA synthase; transl_table 11; gbkey Gene; gene_biotype protein_coding; locus_tag LLMG_RS09170; old_locus_tag llmg_1831; protein_id WP_011675699.1;
LLMG_RS10160	gene2030	-2.91432	9.93067	-10.8627	3.47739e-06	7.98073e-05	4.99512	NC_009004.1	RefSeq	2016189	2016728	-	LLMG_RS10160;	LLMG_RS10160	n	n	transcript_id gene2030; gene_id gene2030; gene_name LLMG_RS10160; Dbxref Genbank:WP_031286534.1; Name WP_031286534.1; gbkey CDS; inference COORDINATES: similar to AA sequence:RefSeq:WP_026138943.1; product translation initiation factor IF-3; transl_table 11; gbkey Gene; gene_biotype protein_coding; locus_tag LLMG_RS10160; protein_id WP_031286534.1;
llmg_2277	gene2286	-2.73084	9.51857	-10.8375	3.54093e-06	8.01745e-05	4.94856	NC_009004.1	RefSeq	2234459	2234884	-	LLMG_RS11430;llmg_2277;	LLMG_RS11430	llm03010	Ribosome	transcript_id gene2286; gene_id gene2286; gene_name rplK; Dbxref Genbank:WP_011677074.1; Name WP_011677074.1; gbkey CDS; inference COORDINATES: similar to AA sequence:RefSeq:NP_268158.1; product 50S ribosomal protein L11; transl_table 11; Name rplK; gbkey Gene; gene_biotype protein_coding; locus_tag LLMG_RS11430; old_locus_tag llmg_2277; protein_id WP_011677074.1;
llmg_1292	gene1313	1.99906	6.61254	10.7775	3.69722e-06	8.27238e-05	4.97743	NC_009004.1	RefSeq	1262312	1262920	-	LLMG_RS06550;llmg_1292;	LLMG_RS06550	llm00340	Histidine metabolism	transcript_id gene1313; gene_id gene1313; gene_name hisH; Dbxref Genbank:WP_011835169.1; Name WP_011835169.1; gbkey CDS; inference COORDINATES: similar to AA sequence:RefSeq:NP_267368.1; product imidazole glycerol phosphate synthase subunit HisH; transl_table 11; Name hisH; gbkey Gene; gene_biotype protein_coding; locus_tag LLMG_RS06550; old_locus_tag llmg_1292; protein_id WP_011835169.1;
llmg_2312	gene2318	-3.01752	10.4736	-10.7688	3.72056e-06	8.27238e-05	5.03594	NC_009004.1	RefSeq	2262171	2263235	-	LLMG_RS11590;llmg_2312;	LLMG_RS11590	llm00220	Arginine biosynthesis	transcript_id gene2318; gene_id gene2318; gene_name argF; Dbxref Genbank:WP_011677108.1; Name WP_011677108.1; gbkey CDS; inference COORDINATES: similar to AA sequence:RefSeq:NP_268193.1; product ornithine carbamoyltransferase; transl_table 11; Name argF; gbkey Gene; gene_biotype protein_coding; locus_tag LLMG_RS11590; old_locus_tag llmg_2312; protein_id WP_011677108.1;
llmg_0140	gene152	2.1272	8.19598	10.7135	3.8728e-06	8.534e-05	4.85708	NC_009004.1	RefSeq	136666	137862	-	LLMG_RS00760;llmg_0140;	LLMG_RS00760	n	n	transcript_id gene152; gene_id gene152; gene_name LLMG_RS00760; Dbxref Genbank:WP_011675183.1; Name WP_011675183.1; Note Confers resistance to fosfomycin and deoxycholate; gbkey CDS; inference COORDINATES: similar to AA sequence:RefSeq:WP_011675183.1; product MFS transporter; transl_table 11; gbkey Gene; gene_biotype protein_coding; locus_tag LLMG_RS00760; old_locus_tag llmg_0140; protein_id WP_0…
llmg_1219	gene1236	2.13331	10.4433	10.6514	4.05178e-06	8.56009e-05	4.88637	NC_009004.1	RefSeq	1186831	1188330	+	LLMG_RS06160;llmg_1219;	LLMG_RS06160	llm00473, llm02020	D-Alanine metabolism , Two-component system	transcript_id gene1236; gene_id gene1236; gene_name dltA; Dbxref Genbank:WP_011835110.1; Name WP_011835110.1; gbkey CDS; inference COORDINATES: similar to AA sequence:RefSeq:NP_267417.1; product D-alanine--poly(phosphoribitol) ligase subunit 1; transl_table 11; Name dltA; gbkey Gene; gene_biotype protein_coding; locus_tag LLMG_RS06160; old_locus_tag llmg_1219; protein_id WP_011835110.1;
llmg_1507	gene1522	2.64904	6.4177	10.6894	3.94116e-06	8.56009e-05	4.92138	NC_009004.1	RefSeq	1480957	1482024	-	LLMG_RS07595;llmg_1507;	LLMG_RS07595	n	n	transcript_id gene1522; gene_id gene1522; gene_name LLMG_RS07595; Dbxref Genbank:WP_011835352.1; Name WP_011835352.1; gbkey CDS; inference COORDINATES: similar to AA sequence:RefSeq:WP_011835352.1; product hypothetical protein; transl_table 11; gbkey Gene; gene_biotype protein_coding; locus_tag LLMG_RS07595; old_locus_tag llmg_1507; protein_id WP_011835352.1;
llmg_2276	gene2285	-2.97603	9.46549	-10.6746	3.98385e-06	8.56009e-05	4.82799	NC_009004.1	RefSeq	2233383	2234072	-	LLMG_RS11425;llmg_2276;	LLMG_RS11425	llm03010	Ribosome	transcript_id gene2285; gene_id gene2285; gene_name LLMG_RS11425; Dbxref Genbank:WP_011677073.1; Name WP_011677073.1; gbkey CDS; inference COORDINATES: similar to AA sequence:RefSeq:NP_268157.1; product 50S ribosomal protein L1; transl_table 11; gbkey Gene; gene_biotype protein_coding; locus_tag LLMG_RS11425; old_locus_tag llmg_2276; protein_id WP_011677073.1;
llmg_2356	gene2364	-2.16816	10.44	-10.643	4.07665e-06	8.56009e-05	4.85474	NC_009004.1	RefSeq	2312735	2313100	-	LLMG_RS11820;llmg_2356;	LLMG_RS11820	llm03010	Ribosome	transcript_id gene2364; gene_id gene2364; gene_name LLMG_RS11820; Dbxref Genbank:WP_003130555.1; Name WP_003130555.1; gbkey CDS; inference COORDINATES: similar to AA sequence:RefSeq:WP_008809894.1; product 30S ribosomal protein S13; transl_table 11; gbkey Gene; gene_biotype protein_coding; locus_tag LLMG_RS11820; old_locus_tag llmg_2356; protein_id WP_003130555.1;
llmg_2545	gene2568	-2.59246	9.4884	-10.6376	4.09275e-06	8.56009e-05	4.79549	NC_009004.1	RefSeq	2505530	2505922	-	LLMG_RS12835;llmg_2545;	LLMG_RS12835	llm03010	Ribosome	transcript_id gene2568; gene_id gene2568; gene_name LLMG_RS12835; Dbxref Genbank:WP_004254378.1; Name WP_004254378.1; gbkey CDS; inference COORDINATES: similar to AA sequence:RefSeq:WP_002942223.1; product 30S ribosomal protein S9; transl_table 11; gbkey Gene; gene_biotype protein_coding; locus_tag LLMG_RS12835; old_locus_tag llmg_2545; protein_id WP_004254378.1;
LLMG_RS06590	gene1321	2.75327	4.58167	10.6689	4.00031e-06	8.56009e-05	4.98033	NC_009004.1	RefSeq	1268640	1268864	-	LLMG_RS06590;	LLMG_RS06590	n	n	transcript_id gene1321; gene_id gene1321; gene_name LLMG_RS06590; Dbxref Genbank:WP_014735029.1; Name WP_014735029.1; gbkey CDS; inference COORDINATES: ab initio prediction:GeneMarkS+; product hypothetical protein; transl_table 11; gbkey Gene; gene_biotype protein_coding; locus_tag LLMG_RS06590; protein_id WP_014735029.1;
llmg_2430	gene2440	-2.5213	11.231	-10.6166	4.15607e-06	8.61947e-05	4.88288	NC_009004.1	RefSeq	2380623	2381390	-	LLMG_RS12205;llmg_2430;	LLMG_RS12205	llm03010	Ribosome	transcript_id gene2440; gene_id gene2440; gene_name rpsB; Dbxref Genbank:WP_011836067.1; Name WP_011836067.1; gbkey CDS; inference COORDINATES: similar to AA sequence:RefSeq:NP_268310.1; product 30S ribosomal protein S2; transl_table 11; Name rpsB; gbkey Gene; gene_biotype protein_coding; locus_tag LLMG_RS12205; old_locus_tag llmg_2430; protein_id WP_011836067.1;
llmg_2546	gene2569	-2.19529	10.6863	-10.603	4.19782e-06	8.63351e-05	4.84417	NC_009004.1	RefSeq	2505942	2506388	-	LLMG_RS12840;llmg_2546;	LLMG_RS12840	llm03010	Ribosome	transcript_id gene2569; gene_id gene2569; gene_name LLMG_RS12840; Dbxref Genbank:WP_011836164.1; Name WP_011836164.1; gbkey CDS; inference COORDINATES: similar to AA sequence:RefSeq:WP_003083327.1; product 50S ribosomal protein L13; transl_table 11; gbkey Gene; gene_biotype protein_coding; locus_tag LLMG_RS12840; old_locus_tag llmg_2546; protein_id WP_011836164.1;
llmg_2544	gene2557	2.59985	8.35519	10.5461	4.37699e-06	8.92761e-05	4.76114	NC_009004.1	RefSeq	2499079	2499534	+	LLMG_RS12780;llmg_2544;	LLMG_RS12780	n	n	transcript_id gene2557; gene_id gene2557; gene_name LLMG_RS12780; Dbxref Genbank:WP_011836163.1; Name WP_011836163.1; gbkey CDS; inference COORDINATES: similar to AA sequence:RefSeq:WP_011836163.1; product hypothetical protein; transl_table 11; gbkey Gene; gene_biotype protein_coding; locus_tag LLMG_RS12780; old_locus_tag llmg_2544; protein_id WP_011836163.1;
llmg_1820	gene1821	1.57303	9.129	10.4931	4.55145e-06	9.20736e-05	4.6621	NC_009004.1	RefSeq	1800198	1801550	+	LLMG_RS09120;llmg_1820;	LLMG_RS09120	llm00260, llm00261, llm00270, llm00300	Glycine, serine and threonine metabolism , Monobactam biosynthesis , Cysteine and methionine metabolism , Lysine biosynthesis	transcript_id gene1821; gene_id gene1821; gene_name LLMG_RS09120; Dbxref Genbank:WP_011835591.1; Name WP_011835591.1; gbkey CDS; inference COORDINATES: similar to AA sequence:RefSeq:NP_266896.1; product aspartate kinase; transl_table 11; gbkey Gene; gene_biotype protein_coding; locus_tag LLMG_RS09120; old_locus_tag llmg_1820; protein_id WP_011835591.1;
llmg_1735	gene1739	-2.39788	9.47724	-10.3904	4.9124e-06	9.85674e-05	4.63463	NC_009004.1	RefSeq	1713852	1715111	-	LLMG_RS08720;llmg_1735;	LLMG_RS08720	llm00190	Oxidative phosphorylation	transcript_id gene1739; gene_id gene1739; gene_name LLMG_RS08720; Dbxref Genbank:WP_011835525.1; Name WP_011835525.1; gbkey CDS; inference COORDINATES: similar to AA sequence:RefSeq:NP_266984.1; product NAD(P)/FAD-dependent oxidoreductase; transl_table 11; gbkey Gene; gene_biotype protein_coding; locus_tag LLMG_RS08720; old_locus_tag llmg_1735; protein_id WP_011835525.1;
llmg_1184	gene1201	1.98227	8.37331	10.3656	5.00405e-06	9.90024e-05	4.59151	NC_009004.1	RefSeq	1155761	1157200	+	LLMG_RS05995;llmg_1184;	LLMG_RS05995	llm00250, llm00910	Alanine, aspartate and glutamate metabolism , Nitrogen metabolism	transcript_id gene1201; gene_id gene1201; gene_name LLMG_RS05995; Dbxref Genbank:WP_011835085.1; Name WP_011835085.1; gbkey CDS; inference COORDINATES: similar to AA sequence:RefSeq:NP_267441.1; product glutamate synthase subunit beta; transl_table 11; gbkey Gene; gene_biotype protein_coding; locus_tag LLMG_RS05995; old_locus_tag llmg_1184; protein_id WP_011835085.1;
llmg_2358	gene2366	-2.1965	10.47	-10.3629	5.0143e-06	9.90024e-05	4.63995	NC_009004.1	RefSeq	2313288	2313506	-	LLMG_RS11830;llmg_2358;	LLMG_RS11830	n	n	transcript_id gene2366; gene_id gene2366; gene_name infA; Dbxref Genbank:WP_003130554.1; Name WP_003130554.1; gbkey CDS; inference COORDINATES: similar to AA sequence:RefSeq:WP_003130554.1; product translation initiation factor IF-1; transl_table 11; Name infA; gbkey Gene; gene_biotype protein_coding; locus_tag LLMG_RS11830; old_locus_tag llmg_2358; protein_id WP_003130554.1;
llmg_1220	gene1237	2.06914	9.86217	10.3186	5.18336e-06	0.000101528	4.58701	NC_009004.1	RefSeq	1188330	1189553	+	LLMG_RS06165;llmg_1220;	LLMG_RS06165	llm02020	Two-component system	transcript_id gene1237; gene_id gene1237; gene_name dltB; Dbxref Genbank:WP_011835111.1; Name WP_011835111.1; gbkey CDS; inference COORDINATES: similar to AA sequence:RefSeq:NP_267416.1; product D-alanyl-lipoteichoic acid biosynthesis protein DltB; transl_table 11; Name dltB; gbkey Gene; gene_biotype protein_coding; locus_tag LLMG_RS06165; old_locus_tag llmg_1220; protein_id WP_011835111.1;
llmg_0411	gene422	-2.18809	9.32665	-10.3023	5.24729e-06	0.000101971	4.5605	NC_009004.1	RefSeq	404132	405760	+	LLMG_RS02100;llmg_0411;	LLMG_RS02100	llm03018	RNA degradation	transcript_id gene422; gene_id gene422; gene_name groL; Dbxref Genbank:WP_011834460.1; Name WP_011834460.1; gbkey CDS; inference COORDINATES: similar to AA sequence:RefSeq:NP_266550.1; product molecular chaperone GroEL; transl_table 11; Name groL; gbkey Gene; gene_biotype protein_coding; locus_tag LLMG_RS02100; old_locus_tag llmg_0411; protein_id WP_011834460.1;
llmg_0727	gene757	-1.9922	10.762	-10.2783	5.34292e-06	0.000102219	4.60319	NC_009004.1	RefSeq	709596	710519	-	LLMG_RS03755;llmg_0727;	LLMG_RS03755	llm00051, llm00520, llm02060	Fructose and mannose metabolism , Amino sugar and nucleotide sugar metabolism , Phosphotransferase system (PTS)	transcript_id gene757; gene_id gene757; gene_name LLMG_RS03755; Dbxref Genbank:WP_011834716.1; Name WP_011834716.1; Note hosphoenolpyruvate-dependent sugar phosphotransferase system catalyzes the phosphorylation of incoming sugar substrates concomitant with their translocation across the cell membrane%3B IID with IIC forms the translocation channel; gbkey CDS; inference COORDINATES: similar to AA…
llmg_1948	gene1948	-2.01264	10.3555	-10.2828	5.32488e-06	0.000102219	4.5707	NC_009004.1	RefSeq	1929984	1931486	-	LLMG_RS09745;llmg_1948;	LLMG_RS09745	llm00190	Oxidative phosphorylation	transcript_id gene1948; gene_id gene1948; gene_name LLMG_RS09745; Dbxref Genbank:WP_011835691.1; Name WP_011835691.1; gbkey CDS; inference COORDINATES: similar to AA sequence:RefSeq:NP_267922.1; product ATP synthase subunit alpha; transl_table 11; gbkey Gene; gene_biotype protein_coding; locus_tag LLMG_RS09745; old_locus_tag llmg_1948; protein_id WP_011835691.1;
llmg_1757	gene1761	3.52644	7.46547	10.165	5.8209e-06	0.000110508	4.50273	NC_009004.1	RefSeq	1742503	1743693	-	LLMG_RS08830;llmg_1757;	LLMG_RS08830	llm00220	Arginine biosynthesis	transcript_id gene1761; gene_id gene1761; gene_name LLMG_RS08830; Dbxref Genbank:WP_011835544.1; Name WP_011835544.1; gbkey CDS; inference COORDINATES: similar to AA sequence:RefSeq:NP_266954.1; product bifunctional glutamate N-acetyltransferase/amino-acid acetyltransferase ArgJ; transl_table 11; gbkey Gene; gene_biotype protein_coding; locus_tag LLMG_RS08830; old_locus_tag llmg_1757; protein_id …
llmg_2311	gene2317	-2.12494	10.4434	-9.92553	6.9965e-06	0.000131812	4.35497	NC_009004.1	RefSeq	2260459	2262039	-	LLMG_RS11585;llmg_2311;	LLMG_RS11585	n	n	transcript_id gene2317; gene_id gene2317; gene_name LLMG_RS11585; Dbxref Genbank:WP_011835984.1; Name WP_011835984.1; gbkey CDS; inference COORDINATES: similar to AA sequence:RefSeq:WP_011835984.1; product amino acid APC transporter; transl_table 11; gbkey Gene; gene_biotype protein_coding; locus_tag LLMG_RS11585; old_locus_tag llmg_2311; protein_id WP_011835984.1;
llmg_0401	gene413	-2.31007	10.5059	-9.91234	7.06856e-06	0.000132161	4.27154	NC_009004.1	RefSeq	395229	396488	-	LLMG_RS02055;llmg_0401;	LLMG_RS02055	llm00970	Aminoacyl-tRNA biosynthesis	transcript_id gene413; gene_id gene413; gene_name LLMG_RS02055; Dbxref Genbank:WP_011834453.1; Name WP_011834453.1; gbkey CDS; inference COORDINATES: similar to AA sequence:RefSeq:NP_266541.1; product tyrosine--tRNA ligase; transl_table 11; gbkey Gene; gene_biotype protein_coding; locus_tag LLMG_RS02055; old_locus_tag llmg_0401; protein_id WP_011834453.1;
llmg_0527	gene556	-2.20386	9.25242	-9.84731	7.43591e-06	0.000137984	4.19188	NC_009004.1	RefSeq	526116	526460	+	LLMG_RS02770;llmg_0527;	LLMG_RS02770	n	n	transcript_id gene556; gene_id gene556; gene_name LLMG_RS02770; Dbxref Genbank:WP_011834562.1; Name WP_011834562.1; gbkey CDS; inference COORDINATES: similar to AA sequence:RefSeq:WP_011675567.1; product hypothetical protein; transl_table 11; gbkey Gene; gene_biotype protein_coding; locus_tag LLMG_RS02770; old_locus_tag llmg_0527; protein_id WP_011834562.1;
llmg_0341	gene353	-1.82815	8.54149	-9.75278	8.00839e-06	0.000145953	4.02493	NC_009004.1	RefSeq	327999	329105	+	LLMG_RS01755;llmg_0341;	LLMG_RS01755	llm02010	ABC transporters	transcript_id gene353; gene_id gene353; gene_name LLMG_RS01755; Dbxref Genbank:WP_011834402.1; Name WP_011834402.1; gbkey CDS; inference COORDINATES: similar to AA sequence:RefSeq:NP_266478.1; product methionine import ATP-binding protein MetN; transl_table 11; gbkey Gene; gene_biotype protein_coding; locus_tag LLMG_RS01755; old_locus_tag llmg_0341; protein_id WP_011834402.1;
llmg_2429	gene2439	-2.58502	10.3537	-9.74734	8.04279e-06	0.000145953	4.13017	NC_009004.1	RefSeq	2379473	2380501	-	LLMG_RS12200;llmg_2429;	LLMG_RS12200	n	n	transcript_id gene2439; gene_id gene2439; gene_name LLMG_RS12200; Dbxref Genbank:WP_011677206.1; Name WP_011677206.1; gbkey CDS; inference COORDINATES: similar to AA sequence:RefSeq:NP_268309.1; product elongation factor Ts; transl_table 11; gbkey Gene; gene_biotype protein_coding; locus_tag LLMG_RS12200; old_locus_tag llmg_2429; protein_id WP_011677206.1;
LLMG_RS09665	gene1930	1.79333	8.28092	9.76155	7.95331e-06	0.000145953	4.07584	NC_009004.1	RefSeq	1911483	1913494	-	LLMG_RS09665;pseudotrue;	LLMG_RS09665	n	n	transcript_id gene1930; gene_id gene1930; gene_name LLMG_RS09665; Note frameshifted; gbkey CDS; inference COORDINATES: similar to AA sequence:RefSeq:NP_267905.1; product ABC transporter permease; pseudo true; transl_table 11; gbkey Gene; gene_biotype pseudogene; locus_tag LLMG_RS09665; pseudo true;
llmg_0292	gene306	1.89397	7.59824	9.69513	8.38154e-06	0.00015099	4.05721	NC_009004.1	RefSeq	280504	281634	+	LLMG_RS01525;llmg_0292;	LLMG_RS01525	llm00300	Lysine biosynthesis	transcript_id gene306; gene_id gene306; gene_name LLMG_RS01525; Dbxref Genbank:WP_011834362.1; Name WP_011834362.1; gbkey CDS; inference COORDINATES: similar to AA sequence:RefSeq:WP_014571978.1; product acetyldiaminopimelate deacetylase; transl_table 11; gbkey Gene; gene_biotype protein_coding; locus_tag LLMG_RS01525; old_locus_tag llmg_0292; protein_id WP_011834362.1;
llmg_0336	gene349	-1.54913	8.10373	-9.67491	8.51689e-06	0.000152317	3.94901	NC_009004.1	RefSeq	324291	325151	+	LLMG_RS01735;llmg_0336;	LLMG_RS01735	llm02010	ABC transporters	transcript_id gene349; gene_id gene349; gene_name LLMG_RS01735; Dbxref Genbank:WP_011834398.1; Name WP_011834398.1; gbkey CDS; inference COORDINATES: similar to AA sequence:RefSeq:NP_266475.1; product MetQ/NlpA family ABC transporter substrate-binding protein; transl_table 11; gbkey Gene; gene_biotype protein_coding; locus_tag LLMG_RS01735; old_locus_tag llmg_0336; protein_id WP_011834398.1;
llmg_2354	gene2362	-2.21904	11.4165	-9.65741	8.63605e-06	0.000153337	4.12927	NC_009004.1	RefSeq	2311344	2312282	-	LLMG_RS11810;llmg_2354;	LLMG_RS11810	llm03020	RNA polymerase	transcript_id gene2362; gene_id gene2362; gene_name LLMG_RS11810; Dbxref Genbank:WP_011836020.1; Name WP_011836020.1; gbkey CDS; inference COORDINATES: similar to AA sequence:RefSeq:NP_268225.1; product DNA-directed RNA polymerase subunit alpha; transl_table 11; gbkey Gene; gene_biotype protein_coding; locus_tag LLMG_RS11810; old_locus_tag llmg_2354; protein_id WP_011836020.1;
llmg_1121	gene1142	-1.42125	9.22732	-9.63306	8.80496e-06	0.000155219	3.92537	NC_009004.1	RefSeq	1082012	1082965	-	LLMG_RS05695;llmg_1121;	LLMG_RS05695	n	n	transcript_id gene1142; gene_id gene1142; gene_name LLMG_RS05695; Dbxref Genbank:WP_011676327.1; Name WP_011676327.1; gbkey CDS; inference COORDINATES: similar to AA sequence:RefSeq:NP_267486.1; product ABC transporter permease; transl_table 11; gbkey Gene; gene_biotype protein_coding; locus_tag LLMG_RS05695; old_locus_tag llmg_1121; protein_id WP_011676327.1;
llmg_2353	gene2361	-2.35064	9.64664	-9.60809	8.98196e-06	0.000157216	3.96393	NC_009004.1	RefSeq	2310945	2311325	-	LLMG_RS11805;llmg_2353;	LLMG_RS11805	llm03010	Ribosome	transcript_id gene2361; gene_id gene2361; gene_name LLMG_RS11805; Dbxref Genbank:WP_003130558.1; Name WP_003130558.1; gbkey CDS; inference COORDINATES: similar to AA sequence:RefSeq:WP_002887523.1; product 50S ribosomal protein L17; transl_table 11; gbkey Gene; gene_biotype protein_coding; locus_tag LLMG_RS11805; old_locus_tag llmg_2353; protein_id WP_003130558.1;
llmg_1173	gene1189	1.39637	7.93015	9.56879	9.26858e-06	0.000159964	3.89572	NC_009004.1	RefSeq	1140260	1141309	+	LLMG_RS05940;llmg_1173;	LLMG_RS05940	n	n	transcript_id gene1189; gene_id gene1189; gene_name LLMG_RS05940; Dbxref Genbank:WP_011835074.1; Name WP_011835074.1; gbkey CDS; inference COORDINATES: ab initio prediction:GeneMarkS+; product hypothetical protein; transl_table 11; gbkey Gene; gene_biotype protein_coding; locus_tag LLMG_RS05940; old_locus_tag llmg_1173; protein_id WP_011835074.1;
llmg_1345	gene1365	1.53047	8.32497	9.57596	9.21555e-06	0.000159964	3.91615	NC_009004.1	RefSeq	1318899	1320203	-	LLMG_RS06815;llmg_1345;	LLMG_RS06815	n	n	transcript_id gene1365; gene_id gene1365; gene_name LLMG_RS06815; Dbxref Genbank:WP_011835216.1; Name WP_011835216.1; gbkey CDS; inference COORDINATES: similar to AA sequence:RefSeq:NP_267303.1; product purine permease; transl_table 11; gbkey Gene; gene_biotype protein_coding; locus_tag LLMG_RS06815; old_locus_tag llmg_1345; protein_id WP_011835216.1;
llmg_0425	gene436	-2.2533	9.21973	-9.45628	1.0147e-05	0.000172709	3.80063	NC_009004.1	RefSeq	415627	416559	-	LLMG_RS02170;llmg_0425;	LLMG_RS02170	llm00900	Terpenoid backbone biosynthesis	transcript_id gene436; gene_id gene436; gene_name mvk; Dbxref Genbank:WP_011834472.1; Name WP_011834472.1; gbkey CDS; inference COORDINATES: similar to AA sequence:RefSeq:NP_266560.1; product mevalonate kinase; transl_table 11; Name mvk; gbkey Gene; gene_biotype protein_coding; locus_tag LLMG_RS02170; old_locus_tag llmg_0425; protein_id WP_011834472.1;
llmg_1575	gene1587	-1.80504	7.33084	-9.45848	1.0129e-05	0.000172709	3.8025	NC_009004.1	RefSeq	1551527	1552066	-	LLMG_RS07935;llmg_1575;	LLMG_RS07935	n	n	transcript_id gene1587; gene_id gene1587; gene_name LLMG_RS07935; Dbxref Genbank:WP_011835409.1; Name WP_011835409.1; gbkey CDS; inference COORDINATES: similar to AA sequence:RefSeq:NP_267109.1; product nucleotide exchange factor GrpE; transl_table 11; gbkey Gene; gene_biotype protein_coding; locus_tag LLMG_RS07935; old_locus_tag llmg_1575; protein_id WP_011835409.1;
llmg_0073	gene81	-1.81129	10.4303	-9.38837	1.07218e-05	0.000180162	3.86996	NC_009004.1	RefSeq	68495	69475	-	LLMG_RS00400;llmg_0073;	LLMG_RS00400	llm00010, llm00020, llm00620	Glycolysis / Gluconeogenesis , Citrate cycle (TCA cycle) , Pyruvate metabolism	transcript_id gene81; gene_id gene81; gene_name LLMG_RS00400; Dbxref Genbank:WP_011834176.1; Name WP_011834176.1; gbkey CDS; inference COORDINATES: similar to AA sequence:RefSeq:NP_266217.1; product alpha-ketoacid dehydrogenase subunit beta; transl_table 11; gbkey Gene; gene_biotype protein_coding; locus_tag LLMG_RS00400; old_locus_tag llmg_0073; protein_id WP_011834176.1;
llmg_0442	gene452	1.74422	6.12875	9.38733	1.07309e-05	0.000180162	3.86172	NC_009004.1	RefSeq	433420	433701	+	LLMG_RS02250;llmg_0442;	LLMG_RS02250	n	n	transcript_id gene452; gene_id gene452; gene_name LLMG_RS02250; Dbxref Genbank:WP_011834484.1; Name WP_011834484.1; gbkey CDS; inference COORDINATES: similar to AA sequence:RefSeq:NP_266574.1; product hypothetical protein; transl_table 11; gbkey Gene; gene_biotype protein_coding; locus_tag LLMG_RS02250; old_locus_tag llmg_0442; protein_id WP_011834484.1;
llmg_1304	gene1326	1.50239	9.14824	9.35592	1.10092e-05	0.000183586	3.72309	NC_009004.1	RefSeq	1272922	1274925	-	LLMG_RS06615;llmg_1304;	LLMG_RS06615	llm03018	RNA degradation	transcript_id gene1326; gene_id gene1326; gene_name rnr; Dbxref Genbank:WP_011835181.1; Name WP_011835181.1; gbkey CDS; inference COORDINATES: similar to AA sequence:RefSeq:WP_011676159.1; product ribonuclease R; transl_table 11; Name rnr; gbkey Gene; gene_biotype protein_coding; locus_tag LLMG_RS06615; old_locus_tag llmg_1304; protein_id WP_011835181.1;
llmg_0507	gene518	-1.5091	9.46613	-9.33007	1.12442e-05	0.000183779	3.71508	NC_009004.1	RefSeq	498140	499789	-	LLMG_RS02580;llmg_0507;	LLMG_RS02580	llm02010, llm02024	ABC transporters , Quorum sensing	transcript_id gene518; gene_id gene518; gene_name LLMG_RS02580; Dbxref Genbank:WP_011834545.1; Name WP_011834545.1; gbkey CDS; inference COORDINATES: similar to AA sequence:RefSeq:NP_266695.1; product peptide ABC transporter substrate-binding protein; transl_table 11; gbkey Gene; gene_biotype protein_coding; locus_tag LLMG_RS02580; old_locus_tag llmg_0507; protein_id WP_011834545.1;
llmg_2367	gene2374	-2.25079	8.97217	-9.34166	1.11381e-05	0.000183779	3.69294	NC_009004.1	RefSeq	2318816	2319214	-	LLMG_RS11870;llmg_2367;	LLMG_RS11870	llm03010	Ribosome	transcript_id gene2374; gene_id gene2374; gene_name LLMG_RS11870; Dbxref Genbank:WP_011677155.1; Name WP_011677155.1; gbkey CDS; inference COORDINATES: similar to AA sequence:RefSeq:WP_010742763.1; product 30S ribosomal protein S8; transl_table 11; gbkey Gene; gene_biotype protein_coding; locus_tag LLMG_RS11870; old_locus_tag llmg_2367; protein_id WP_011677155.1;
llmg_2556	gene2579	-2.06769	11.3875	-9.3363	1.1187e-05	0.000183779	3.84766	NC_009004.1	RefSeq	2514375	2516504	-	LLMG_RS12890;llmg_2556;	LLMG_RS12890	n	n	transcript_id gene2579; gene_id gene2579; gene_name fusA; Dbxref Genbank:WP_011836173.1; Name WP_011836173.1; gbkey CDS; inference COORDINATES: similar to AA sequence:RefSeq:NP_268417.1; product elongation factor G; transl_table 11; Name fusA; gbkey Gene; gene_biotype protein_coding; locus_tag LLMG_RS12890; old_locus_tag llmg_2556; protein_id WP_011836173.1;
llmg_0491	gene502	1.40374	8.01749	9.29817	1.15419e-05	0.000185519	3.66933	NC_009004.1	RefSeq	485703	486356	-	LLMG_RS02500;llmg_0491;	LLMG_RS02500	n	n	transcript_id gene502; gene_id gene502; gene_name LLMG_RS02500; Dbxref Genbank:WP_011834531.1; Name WP_011834531.1; gbkey CDS; inference COORDINATES: similar to AA sequence:RefSeq:NP_266653.1; product hemolysin III; transl_table 11; gbkey Gene; gene_biotype protein_coding; locus_tag LLMG_RS02500; old_locus_tag llmg_0491; protein_id WP_011834531.1;
llmg_0536	gene564	2.42804	8.11153	9.28771	1.16415e-05	0.000185519	3.69637	NC_009004.1	RefSeq	535174	536295	+	LLMG_RS02810;llmg_0536;	LLMG_RS02810	llm00220	Arginine biosynthesis	transcript_id gene564; gene_id gene564; gene_name LLMG_RS02810; Dbxref Genbank:WP_011834570.1; Name WP_011834570.1; gbkey CDS; inference COORDINATES: similar to AA sequence:RefSeq:WP_011834570.1; product acetylornithine deacetylase; transl_table 11; gbkey Gene; gene_biotype protein_coding; locus_tag LLMG_RS02810; old_locus_tag llmg_0536; protein_id WP_011834570.1;
llmg_1058	gene1077	-1.61628	8.32617	-9.30534	1.14742e-05	0.000185519	3.62435	NC_009004.1	RefSeq	1019146	1020066	-	LLMG_RS05370;llmg_1058;	LLMG_RS05370	llm00770	Pantothenate and CoA biosynthesis	transcript_id gene1077; gene_id gene1077; gene_name LLMG_RS05370; Dbxref Genbank:WP_011834976.1; Name WP_011834976.1; gbkey CDS; inference COORDINATES: similar to AA sequence:RefSeq:NP_267600.1; product type I pantothenate kinase; transl_table 11; gbkey Gene; gene_biotype protein_coding; locus_tag LLMG_RS05370; old_locus_tag llmg_1058; protein_id WP_011834976.1;
llmg_1788	gene1791	-1.69516	8.12682	-9.28668	1.16513e-05	0.000185519	3.61241	NC_009004.1	RefSeq	1767922	1768362	-	LLMG_RS08970;llmg_1788;	LLMG_RS08970	n	n	transcript_id gene1791; gene_id gene1791; gene_name LLMG_RS08970; Dbxref Genbank:WP_011675740.1; Name WP_011675740.1; gbkey CDS; inference COORDINATES: similar to AA sequence:RefSeq:NP_266926.1; product MarR family transcriptional regulator; transl_table 11; gbkey Gene; gene_biotype protein_coding; locus_tag LLMG_RS08970; old_locus_tag llmg_1788; protein_id WP_011675740.1;
llmg_1529	gene1542	-2.94165	7.42727	-9.25768	1.19325e-05	0.000187613	3.68619	NC_009004.1	RefSeq	1501033	1501497	-	LLMG_RS07695;llmg_1529;	LLMG_RS07695	llm00740	Riboflavin metabolism	transcript_id gene1542; gene_id gene1542; gene_name LLMG_RS07695; Dbxref Genbank:WP_011835371.1; Name WP_011835371.1; gbkey CDS; inference COORDINATES: similar to AA sequence:RefSeq:WP_011835371.1; product 6%2C7-dimethyl-8-ribityllumazine synthase; transl_table 11; gbkey Gene; gene_biotype protein_coding; locus_tag LLMG_RS07695; old_locus_tag llmg_1529; protein_id WP_011835371.1;
llmg_1779	gene1782	-1.97304	9.37719	-9.25744	1.19349e-05	0.000187613	3.64258	NC_009004.1	RefSeq	1760411	1761778	-	LLMG_RS08930;llmg_1779;	LLMG_RS08930	llm00061, llm00620, llm00640	Fatty acid biosynthesis , Pyruvate metabolism , Propanoate metabolism	transcript_id gene1782; gene_id gene1782; gene_name accC; Dbxref Genbank:WP_011835562.1; Name WP_011835562.1; gbkey CDS; inference COORDINATES: similar to AA sequence:RefSeq:NP_266934.1; product acetyl-CoA carboxylase biotin carboxylase subunit; transl_table 11; Name accC; gbkey Gene; gene_biotype protein_coding; locus_tag LLMG_RS08930; old_locus_tag llmg_1779; protein_id WP_011835562.1;
llmg_0439	gene449	-2.29624	7.59995	-9.21282	1.23825e-05	0.000193418	3.58744	NC_009004.1	RefSeq	429250	429978	+	LLMG_RS02235;llmg_0439;	LLMG_RS02235	n	n	transcript_id gene449; gene_id gene449; gene_name LLMG_RS02235; Dbxref Genbank:WP_011834482.1; Name WP_011834482.1; gbkey CDS; inference COORDINATES: similar to AA sequence:RefSeq:WP_011675490.1; product MurR/RpiR family transcriptional regulator; transl_table 11; gbkey Gene; gene_biotype protein_coding; locus_tag LLMG_RS02235; old_locus_tag llmg_0439; protein_id WP_011834482.1;
llmg_1778	gene1781	-2.29805	10.4802	-9.17849	1.27396e-05	0.000197745	3.66359	NC_009004.1	RefSeq	1759459	1760325	-	LLMG_RS08925;llmg_1778;	LLMG_RS08925	llm00061, llm00620, llm00640	Fatty acid biosynthesis , Pyruvate metabolism , Propanoate metabolism	transcript_id gene1781; gene_id gene1781; gene_name LLMG_RS08925; Dbxref Genbank:WP_011835561.1; Name WP_011835561.1; gbkey CDS; inference COORDINATES: similar to AA sequence:RefSeq:NP_266935.1; product acetyl-CoA carboxylase carboxyl transferase subunit beta; transl_table 11; gbkey Gene; gene_biotype protein_coding; locus_tag LLMG_RS08925; old_locus_tag llmg_1778; protein_id WP_011835561.1;
llmg_0072	gene80	-1.89228	10.965	-9.16327	1.29016e-05	0.000197906	3.7069	NC_009004.1	RefSeq	66910	68502	-	LLMG_RS00395;llmg_0072;	LLMG_RS00395	llm00010, llm00020, llm00620	Glycolysis / Gluconeogenesis , Citrate cycle (TCA cycle) , Pyruvate metabolism	transcript_id gene80; gene_id gene80; gene_name LLMG_RS00395; Dbxref Genbank:WP_011834175.1; Name WP_011834175.1; gbkey CDS; inference COORDINATES: similar to AA sequence:RefSeq:NP_266216.1; product dihydrolipoamide acetyltransferase; transl_table 11; gbkey Gene; gene_biotype protein_coding; locus_tag LLMG_RS00395; old_locus_tag llmg_0072; protein_id WP_011834175.1;
llmg_1123	gene1144	-1.49706	9.40406	-9.16245	1.29104e-05	0.000197906	3.53906	NC_009004.1	RefSeq	1084049	1085569	-	LLMG_RS05705;llmg_1123;	LLMG_RS05705	n	n	transcript_id gene1144; gene_id gene1144; gene_name LLMG_RS05705; Dbxref Genbank:WP_011835028.1; Name WP_011835028.1; gbkey CDS; inference COORDINATES: similar to AA sequence:RefSeq:NP_267484.1; product ABC transporter ATP-binding protein; transl_table 11; gbkey Gene; gene_biotype protein_coding; locus_tag LLMG_RS05705; old_locus_tag llmg_1123; protein_id WP_011835028.1;
llmg_0091	gene100	1.42981	9.42822	9.04096	1.42894e-05	0.000215231	3.49011	NC_009004.1	RefSeq	86633	87913	-	LLMG_RS00495;llmg_0091;	LLMG_RS00495	llm00270	Cysteine and methionine metabolism	transcript_id gene100; gene_id gene100; gene_name LLMG_RS00495; Dbxref Genbank:WP_011834194.1; Name WP_011834194.1; Note catalyzes the formation of L-methionine and acetate from O-acetyl-L-homoserine and methanethiol; gbkey CDS; inference COORDINATES: similar to AA sequence:RefSeq:NP_266229.1; product O-acetylhomoserine aminocarboxypropyltransferase/cysteine synthase; transl_table 11; gbkey Gene;…
llmg_1641	gene1651	-1.45317	6.9084	-9.04754	1.42106e-05	0.000215231	3.45961	NC_009004.1	RefSeq	1619425	1620186	-	LLMG_RS08260;llmg_1641;	LLMG_RS08260	llm00650	Butanoate metabolism	transcript_id gene1651; gene_id gene1651; gene_name LLMG_RS08260; Dbxref Genbank:WP_011835462.1; Name WP_011835462.1; gbkey CDS; inference COORDINATES: similar to AA sequence:RefSeq:NP_267054.1; product 3-oxoacyl-ACP reductase; transl_table 11; gbkey Gene; gene_biotype protein_coding; locus_tag LLMG_RS08260; old_locus_tag llmg_1641; protein_id WP_011835462.1;
llmg_1719	gene1724	1.60025	7.64618	9.03989	1.43022e-05	0.000215231	3.47248	NC_009004.1	RefSeq	1694953	1695666	-	LLMG_RS08645;llmg_1719;	LLMG_RS08645	n	n	transcript_id gene1724; gene_id gene1724; gene_name LLMG_RS08645; Dbxref Genbank:WP_011675796.1; Name WP_011675796.1; gbkey CDS; inference COORDINATES: similar to AA sequence:RefSeq:WP_012897492.1; product nicotinamide mononucleotide transporter; transl_table 11; gbkey Gene; gene_biotype protein_coding; locus_tag LLMG_RS08645; old_locus_tag llmg_1719; protein_id WP_011675796.1;
llmg_1195	gene1212	-2.40669	10.2506	-9.0179	1.45691e-05	0.000217919	3.56063	NC_009004.1	RefSeq	1164663	1165283	+	LLMG_RS06050;llmg_1195;	LLMG_RS06050	n	n	transcript_id gene1212; gene_id gene1212; gene_name LLMG_RS06050; Dbxref Genbank:WP_011835093.1; Name WP_011835093.1; gbkey CDS; inference COORDINATES: similar to AA sequence:RefSeq:NP_267430.2; product riboflavin transporter RibU; transl_table 11; gbkey Gene; gene_biotype protein_coding; locus_tag LLMG_RS06050; old_locus_tag llmg_1195; protein_id WP_011835093.1;
llmg_0993	gene1013	1.95033	7.93404	9.00101	1.47779e-05	0.00021971	3.4912	NC_009004.1	RefSeq	957962	958504	+	LLMG_RS05050;llmg_0993;	LLMG_RS05050	llm00230	Purine metabolism	transcript_id gene1013; gene_id gene1013; gene_name hpt; Dbxref Genbank:WP_011676466.1; Name WP_011676466.1; gbkey CDS; inference COORDINATES: similar to AA sequence:RefSeq:NP_267675.1; product hypoxanthine phosphoribosyltransferase; transl_table 11; Name hpt; gbkey Gene; gene_biotype protein_coding; locus_tag LLMG_RS05050; old_locus_tag llmg_0993; protein_id WP_011676466.1;
llmg_1896	gene1895	-1.52872	8.098	-8.98516	1.49769e-05	0.000221335	3.33349	NC_009004.1	RefSeq	1874773	1875534	-	LLMG_RS09490;llmg_1896;	LLMG_RS09490	llm02010	ABC transporters	transcript_id gene1895; gene_id gene1895; gene_name pstB; Dbxref Genbank:WP_003130886.1; Name WP_003130886.1; gbkey CDS; inference COORDINATES: similar to AA sequence:RefSeq:NP_267872.1; product phosphate ABC transporter ATP-binding protein; transl_table 11; Name pstB; gbkey Gene; gene_biotype protein_coding; locus_tag LLMG_RS09490; old_locus_tag llmg_1896; protein_id WP_003130886.1;
llmg_1782	gene1785	-2.1921	8.39757	-8.9197	1.58308e-05	0.000232561	3.31393	NC_009004.1	RefSeq	1762733	1763200	-	LLMG_RS08940;llmg_1782;	LLMG_RS08940	llm00061, llm00620, llm00640	Fatty acid biosynthesis , Pyruvate metabolism , Propanoate metabolism	transcript_id gene1785; gene_id gene1785; gene_name LLMG_RS08940; Dbxref Genbank:WP_011835564.1; Name WP_011835564.1; gbkey CDS; inference COORDINATES: similar to AA sequence:RefSeq:NP_266932.1; product acetyl-CoA carboxylase biotin carboxyl carrier protein; transl_table 11; gbkey Gene; gene_biotype protein_coding; locus_tag LLMG_RS08940; old_locus_tag llmg_1782; protein_id WP_011835564.1;
llmg_0210	gene223	-1.86659	9.06515	-8.87443	1.64526e-05	0.000237457	3.26975	NC_009004.1	RefSeq	198457	199356	+	LLMG_RS01110;llmg_0210;	LLMG_RS01110	llm00521, llm00523	Streptomycin biosynthesis , Polyketide sugar unit biosynthesis	transcript_id gene223; gene_id gene223; gene_name rfbD; Dbxref Genbank:WP_011834293.1; Name WP_011834293.1; gbkey CDS; inference COORDINATES: similar to AA sequence:RefSeq:NP_266355.1; product dTDP-4-dehydrorhamnose reductase; transl_table 11; Name rfbD; gbkey Gene; gene_biotype protein_coding; locus_tag LLMG_RS01110; old_locus_tag llmg_0210; protein_id WP_011834293.1;
llmg_1755	gene1759	3.10174	7.42979	8.87692	1.64178e-05	0.000237457	3.38609	NC_009004.1	RefSeq	1740509	1741360	-	LLMG_RS08820;llmg_1755;	LLMG_RS08820	llm00220	Arginine biosynthesis	transcript_id gene1759; gene_id gene1759; gene_name argB; Dbxref Genbank:WP_011835542.1; Name WP_011835542.1; gbkey CDS; inference COORDINATES: similar to AA sequence:RefSeq:NP_266956.1; product acetylglutamate kinase; transl_table 11; Name argB; gbkey Gene; gene_biotype protein_coding; locus_tag LLMG_RS08820; old_locus_tag llmg_1755; protein_id WP_011835542.1;
llmg_1787	gene1790	-2.15632	8.89855	-8.88109	1.63595e-05	0.000237457	3.2814	NC_009004.1	RefSeq	1766945	1767922	-	LLMG_RS08965;llmg_1787;	LLMG_RS08965	llm00061	Fatty acid biosynthesis	transcript_id gene1790; gene_id gene1790; gene_name LLMG_RS08965; Dbxref Genbank:WP_011835568.1; Name WP_011835568.1; gbkey CDS; inference COORDINATES: similar to AA sequence:RefSeq:NP_266927.1; product 3-oxoacyl-ACP synthase III; transl_table 11; gbkey Gene; gene_biotype protein_coding; locus_tag LLMG_RS08965; old_locus_tag llmg_1787; protein_id WP_011835568.1;
llmg_2431	gene2441	-1.56259	8.92382	-8.80361	1.74809e-05	0.000250831	3.21648	NC_009004.1	RefSeq	2381785	2382810	+	LLMG_RS12210;llmg_2431;	LLMG_RS12210	llm00030	Pentose phosphate pathway	transcript_id gene2441; gene_id gene2441; gene_name LLMG_RS12210; Dbxref Genbank:WP_011836068.1; Name WP_011836068.1; gbkey CDS; inference COORDINATES: similar to AA sequence:RefSeq:NP_268311.1; product hypothetical protein; transl_table 11; gbkey Gene; gene_biotype protein_coding; locus_tag LLMG_RS12210; old_locus_tag llmg_2431; protein_id WP_011836068.1;
llmg_1777	gene1780	-2.42987	9.88093	-8.77767	1.78751e-05	0.000255005	3.24767	NC_009004.1	RefSeq	1758672	1759466	-	LLMG_RS08920;llmg_1777;	LLMG_RS08920	llm00061, llm00620, llm00640	Fatty acid biosynthesis , Pyruvate metabolism , Propanoate metabolism	transcript_id gene1780; gene_id gene1780; gene_name accA; Dbxref Genbank:WP_011835560.1; Name WP_011835560.1; gbkey CDS; inference COORDINATES: similar to AA sequence:RefSeq:NP_266936.1; product acetyl-CoA carboxylase carboxyl transferase subunit alpha; transl_table 11; Name accA; gbkey Gene; gene_biotype protein_coding; locus_tag LLMG_RS08920; old_locus_tag llmg_1777; protein_id WP_011835560.1;
llmg_2363	gene2370	-2.67882	7.72421	-8.75225	1.82712e-05	0.000259157	3.23759	NC_009004.1	RefSeq	2316732	2316911	-	LLMG_RS11850;llmg_2363;	LLMG_RS11850	llm03010	Ribosome	transcript_id gene2370; gene_id gene2370; gene_name rpmD; Dbxref Genbank:WP_003129921.1; Name WP_003129921.1; gbkey CDS; inference COORDINATES: similar to AA sequence:RefSeq:NP_268237.1; product 50S ribosomal protein L30; transl_table 11; Name rpmD; gbkey Gene; gene_biotype protein_coding; locus_tag LLMG_RS11850; old_locus_tag llmg_2363; protein_id WP_003129921.1;
llmg_0291	gene305	1.6463	8.03162	8.71962	1.87938e-05	0.00026354	3.15672	NC_009004.1	RefSeq	279596	280366	+	LLMG_RS01520;llmg_0291;	LLMG_RS01520	llm00300	Lysine biosynthesis	transcript_id gene305; gene_id gene305; gene_name dapD; Dbxref Genbank:WP_011834361.1; Name WP_011834361.1; gbkey CDS; inference COORDINATES: similar to AA sequence:RefSeq:NP_266437.1; product 2%2C3%2C4%2C5-tetrahydropyridine-2%2C6-dicarboxylate N-acetyltransferase; transl_table 11; Name dapD; gbkey Gene; gene_biotype protein_coding; locus_tag LLMG_RS01520; old_locus_tag llmg_0291; protein_id WP_…
llmg_1785	gene1788	-1.94011	9.69962	-8.72425	1.87186e-05	0.00026354	3.18767	NC_009004.1	RefSeq	1765337	1766257	-	LLMG_RS08955;llmg_1785;	LLMG_RS08955	llm00061	Fatty acid biosynthesis	transcript_id gene1788; gene_id gene1788; gene_name fabD; Dbxref Genbank:WP_011835567.1; Name WP_011835567.1; gbkey CDS; inference COORDINATES: similar to AA sequence:RefSeq:NP_266929.1; product [acyl-carrier-protein] S-malonyltransferase; transl_table 11; Name fabD; gbkey Gene; gene_biotype protein_coding; locus_tag LLMG_RS08955; old_locus_tag llmg_1785; protein_id WP_011835567.1;
llmg_0974	gene997	2.31549	5.31978	8.67511	1.95336e-05	0.000270233	3.3533	NC_009004.1	RefSeq	937642	937908	+	LLMG_RS04955;llmg_0974;	LLMG_RS04955	llm00230	Purine metabolism	transcript_id gene997; gene_id gene997; gene_name LLMG_RS04955; Dbxref Genbank:WP_011676478.1; Name WP_011676478.1; gbkey CDS; inference COORDINATES: similar to AA sequence:RefSeq:WP_011676478.1; product phosphoribosylformylglycinamidine synthase subunit PurS; transl_table 11; gbkey Gene; gene_biotype protein_coding; locus_tag LLMG_RS04955; old_locus_tag llmg_0974; protein_id WP_011676478.1;
llmg_1671	gene1680	-2.00156	9.32466	-8.67123	1.95996e-05	0.000270233	3.10719	NC_009004.1	RefSeq	1645348	1645692	-	LLMG_RS08405;llmg_1671;	LLMG_RS08405	llm03010	Ribosome	transcript_id gene1680; gene_id gene1680; gene_name LLMG_RS08405; Dbxref Genbank:WP_011675838.1; Name WP_011675838.1; gbkey CDS; inference COORDINATES: similar to AA sequence:RefSeq:WP_005590628.1; product 50S ribosomal protein L19; transl_table 11; gbkey Gene; gene_biotype protein_coding; locus_tag LLMG_RS08405; old_locus_tag llmg_1671; protein_id WP_011675838.1;
llmg_2160	gene2158	-1.83727	9.6407	-8.67412	1.95504e-05	0.000270233	3.1382	NC_009004.1	RefSeq	2119789	2120988	-	LLMG_RS10795;llmg_2160;	LLMG_RS10795	llm00270	Cysteine and methionine metabolism	transcript_id gene2158; gene_id gene2158; gene_name LLMG_RS10795; Dbxref Genbank:WP_011835864.1; Name WP_011835864.1; gbkey CDS; inference COORDINATES: similar to AA sequence:RefSeq:NP_268059.1; product S-adenosylmethionine synthase; transl_table 11; gbkey Gene; gene_biotype protein_coding; locus_tag LLMG_RS10795; old_locus_tag llmg_2160; protein_id WP_011835864.1;
llmg_0906	gene931	-2.50276	12.1371	-8.66014	1.97896e-05	0.000271338	3.30347	NC_009004.1	RefSeq	873207	873452	+	LLMG_RS04625;llmg_0906;	LLMG_RS04625	llm03010	Ribosome	transcript_id gene931; gene_id gene931; gene_name rpmE2; Dbxref Genbank:WP_011676633.1; Name WP_011676633.1; Note RpmE2%3B there appears to be two types of ribosomal proteins L31 in bacterial genomes%3B some contain a CxxC motif while others do not%3B Bacillus subtilis has both types%3B the proteins in this cluster do not have the CXXC motif%3B RpmE is found in exponentially growing Bacilli while…
llmg_0926	gene951	-1.5083	8.73473	-8.64363	2.00762e-05	0.000273746	3.03097	NC_009004.1	RefSeq	895195	896235	-	LLMG_RS04725;llmg_0926;	LLMG_RS04725	n	n	transcript_id gene951; gene_id gene951; gene_name LLMG_RS04725; Dbxref Genbank:WP_011834873.1; Name WP_011834873.1; gbkey CDS; inference COORDINATES: similar to AA sequence:RefSeq:WP_011834873.1; product tRNA preQ1(34) S-adenosylmethionine ribosyltransferase-isomerase QueA; transl_table 11; gbkey Gene; gene_biotype protein_coding; locus_tag LLMG_RS04725; old_locus_tag llmg_0926; protein_id WP_011…
llmg_0528	gene557	-2.49336	10.4592	-8.59986	2.08589e-05	0.000282856	3.19222	NC_009004.1	RefSeq	526506	528752	+	LLMG_RS02775;llmg_0528;	LLMG_RS02775	n	n	transcript_id gene557; gene_id gene557; gene_name LLMG_RS02775; Dbxref Genbank:WP_011834563.1; Name WP_011834563.1; gbkey CDS; inference COORDINATES: similar to AA sequence:RefSeq:NP_266713.1; product ATP-dependent Clp protease ATP-binding subunit; transl_table 11; gbkey Gene; gene_biotype protein_coding; locus_tag LLMG_RS02775; old_locus_tag llmg_0528; protein_id WP_011834563.1;
llmg_0437	gene447	-2.86977	9.32873	-8.56758	2.14577e-05	0.000289385	3.06426	NC_009004.1	RefSeq	428397	428723	+	LLMG_RS02225;llmg_0437;	LLMG_RS02225	llm00500, llm02060	Starch and sucrose metabolism , Phosphotransferase system (PTS)	transcript_id gene447; gene_id gene447; gene_name LLMG_RS02225; Dbxref Genbank:WP_011675488.1; Name WP_011675488.1; gbkey CDS; inference COORDINATES: similar to AA sequence:RefSeq:NP_266569.1; product PTS sugar transporter subunit IIB; transl_table 11; gbkey Gene; gene_biotype protein_coding; locus_tag LLMG_RS02225; old_locus_tag llmg_0437; protein_id WP_011675488.1;
LLMG_RS01050	gene211	-1.47395	7.67721	-8.54864	2.18179e-05	0.000292644	2.96555	NC_009004.1	RefSeq	188260	188460	-	LLMG_RS01050;	LLMG_RS01050	n	n	transcript_id gene211; gene_id gene211; gene_name LLMG_RS01050; Dbxref Genbank:WP_014734907.1; Name WP_014734907.1; gbkey CDS; inference COORDINATES: similar to AA sequence:RefSeq:NP_266342.1; product hypothetical protein; transl_table 11; gbkey Gene; gene_biotype protein_coding; locus_tag LLMG_RS01050; protein_id WP_014734907.1;
llmg_0952	gene976	1.82795	9.01202	8.5254	2.22691e-05	0.000297081	2.97024	NC_009004.1	RefSeq	919131	920066	+	LLMG_RS04850;llmg_0952;	LLMG_RS04850	llm00240	Pyrimidine metabolism	transcript_id gene976; gene_id gene976; gene_name LLMG_RS04850; Dbxref Genbank:WP_011834894.1; Name WP_011834894.1; gbkey CDS; inference COORDINATES: similar to AA sequence:RefSeq:NP_267708.1; product dihydroorotate dehydrogenase; transl_table 11; gbkey Gene; gene_biotype protein_coding; locus_tag LLMG_RS04850; old_locus_tag llmg_0952; protein_id WP_011834894.1;
llmg_1828	gene1828	-1.51632	7.87353	-8.49603	2.28542e-05	0.000303248	2.87707	NC_009004.1	RefSeq	1807705	1808877	+	LLMG_RS09155;llmg_1828;	LLMG_RS09155	llm00130	Ubiquinone and other terpenoid-quinone biosynthesis	transcript_id gene1828; gene_id gene1828; gene_name LLMG_RS09155; Dbxref Genbank:WP_080506519.1; Name WP_080506519.1; gbkey CDS; inference COORDINATES: similar to AA sequence:RefSeq:NP_266888.1; product isochorismate synthase; transl_table 11; gbkey Gene; gene_biotype protein_coding; locus_tag LLMG_RS09155; old_locus_tag llmg_1828; protein_id WP_080506519.1;
llmg_1642	gene1652	-1.18521	7.41246	-8.46199	2.35538e-05	0.000310859	2.84351	NC_009004.1	RefSeq	1620222	1621292	-	LLMG_RS08265;llmg_1642;	LLMG_RS08265	llm00650	Butanoate metabolism	transcript_id gene1652; gene_id gene1652; gene_name LLMG_RS08265; Dbxref Genbank:WP_041931199.1; Name WP_041931199.1; gbkey CDS; inference COORDINATES: similar to AA sequence:RefSeq:NP_267053.2; product butanediol dehydrogenase; transl_table 11; gbkey Gene; gene_biotype protein_coding; locus_tag LLMG_RS08265; old_locus_tag llmg_1642; protein_id WP_041931199.1;
llmg_0230	gene243	1.56814	10.5385	8.4433	2.3948e-05	0.000314381	2.997	NC_009004.1	RefSeq	220476	221957	+	LLMG_RS01210;llmg_0230;	LLMG_RS01210	llm00230	Purine metabolism	transcript_id gene243; gene_id gene243; gene_name LLMG_RS01210; Dbxref Genbank:WP_011834313.1; Name WP_011834313.1; gbkey CDS; inference COORDINATES: similar to AA sequence:RefSeq:WP_003090086.1; product IMP dehydrogenase; transl_table 11; gbkey Gene; gene_biotype protein_coding; locus_tag LLMG_RS01210; old_locus_tag llmg_0230; protein_id WP_011834313.1;
llmg_0610	gene637	-1.73452	9.99499	-8.43044	2.42234e-05	0.000314649	2.92926	NC_009004.1	RefSeq	599021	599491	+	LLMG_RS03175;llmg_0610;	LLMG_RS03175	n	n	transcript_id gene637; gene_id gene637; gene_name LLMG_RS03175; Dbxref Genbank:WP_011834626.1; Name WP_011834626.1; gbkey CDS; inference COORDINATES: similar to AA sequence:RefSeq:NP_266792.1; product transcription elongation factor GreA; transl_table 11; gbkey Gene; gene_biotype protein_coding; locus_tag LLMG_RS03175; old_locus_tag llmg_0610; protein_id WP_011834626.1;
llmg_0986	gene1006	-2.30144	11.7281	-8.43337	2.41603e-05	0.000314649	3.11464	NC_009004.1	RefSeq	948593	951196	+	LLMG_RS05015;llmg_0986;	LLMG_RS05015	n	n	transcript_id gene1006; gene_id gene1006; gene_name clpB; Dbxref Genbank:WP_011834922.1; Name WP_011834922.1; gbkey CDS; inference COORDINATES: similar to AA sequence:RefSeq:NP_267681.1; product chaperone protein ClpB; transl_table 11; Name clpB; gbkey Gene; gene_biotype protein_coding; locus_tag LLMG_RS05015; old_locus_tag llmg_0986; protein_id WP_011834922.1;
llmg_1346	gene1366	1.80573	6.99156	8.42021	2.44449e-05	0.000315864	2.98719	NC_009004.1	RefSeq	1320261	1320854	-	LLMG_RS06820;llmg_1346;	LLMG_RS06820	llm00230	Purine metabolism	transcript_id gene1366; gene_id gene1366; gene_name LLMG_RS06820; Dbxref Genbank:WP_011835217.1; Name WP_011835217.1; gbkey CDS; inference COORDINATES: similar to AA sequence:RefSeq:NP_267302.1; product xanthine phosphoribosyltransferase; transl_table 11; gbkey Gene; gene_biotype protein_coding; locus_tag LLMG_RS06820; old_locus_tag llmg_1346; protein_id WP_011835217.1;
llmg_0209	gene222	-1.78295	9.6241	-8.39858	2.49209e-05	0.000318677	2.87245	NC_009004.1	RefSeq	197217	198269	+	LLMG_RS01105;llmg_0209;	LLMG_RS01105	llm00521, llm00523, llm00525	Streptomycin biosynthesis , Polyketide sugar unit biosynthesis , Acarbose and validamycin biosynthesis	transcript_id gene222; gene_id gene222; gene_name rfbB; Dbxref Genbank:WP_011834292.1; Name WP_011834292.1; gbkey CDS; inference COORDINATES: similar to AA sequence:RefSeq:WP_003129782.1; product dTDP-glucose 4%2C6-dehydratase; transl_table 11; Name rfbB; gbkey Gene; gene_biotype protein_coding; locus_tag LLMG_RS01105; old_locus_tag llmg_0209; protein_id WP_011834292.1;
llmg_0732	gene762	-1.73847	8.84219	-8.4011	2.4865e-05	0.000318677	2.81446	NC_009004.1	RefSeq	713570	714232	+	LLMG_RS03780;llmg_0732;	LLMG_RS03780	llm00240	Pyrimidine metabolism	transcript_id gene762; gene_id gene762; gene_name LLMG_RS03780; Dbxref Genbank:WP_011834720.1; Name WP_011834720.1; gbkey CDS; inference COORDINATES: similar to AA sequence:RefSeq:NP_267859.1; product cytidylate kinase; transl_table 11; gbkey Gene; gene_biotype protein_coding; locus_tag LLMG_RS03780; old_locus_tag llmg_0732; protein_id WP_011834720.1;
llmg_0225	gene238	-1.35855	8.95138	-8.38295	2.52712e-05	0.000321492	2.78305	NC_009004.1	RefSeq	213980	215398	+	LLMG_RS01185;llmg_0225;	LLMG_RS01185	n	n	transcript_id gene238; gene_id gene238; gene_name LLMG_RS01185; Dbxref Genbank:WP_011834308.1; Name WP_011834308.1; gbkey CDS; inference COORDINATES: similar to AA sequence:RefSeq:WP_011675252.1; product hypothetical protein; transl_table 11; gbkey Gene; gene_biotype protein_coding; locus_tag LLMG_RS01185; old_locus_tag llmg_0225; protein_id WP_011834308.1;
llmg_1897	gene1896	-1.44337	8.44786	-8.32797	2.65478e-05	0.000336	2.7146	NC_009004.1	RefSeq	1875742	1876551	-	LLMG_RS09495;llmg_1897;	LLMG_RS09495	llm02010	ABC transporters	transcript_id gene1896; gene_id gene1896; gene_name pstB; Dbxref Genbank:WP_011676712.1; Name WP_011676712.1; gbkey CDS; inference COORDINATES: similar to AA sequence:RefSeq:NP_267873.1; product phosphate ABC transporter ATP-binding protein; transl_table 11; Name pstB; gbkey Gene; gene_biotype protein_coding; locus_tag LLMG_RS09495; old_locus_tag llmg_1897; protein_id WP_011676712.1;
llmg_0071	gene79	-1.68877	11.0325	-8.30102	2.71997e-05	0.000340755	2.92378	NC_009004.1	RefSeq	65273	66691	-	LLMG_RS00390;llmg_0071;	LLMG_RS00390	llm00010, llm00020, llm00260, llm00280, llm00620, llm00630, llm00640	Glycolysis / Gluconeogenesis , Citrate cycle (TCA cycle) , Glycine, serine and threonine metabolism , Valine, leucine and isoleucine degradation , Pyruvate metabolism , Glyoxylate and dicarboxylate metabolism , Propanoate metabolism	transcript_id gene79; gene_id gene79; gene_name lpdA; Dbxref Genbank:WP_011834174.1; Name WP_011834174.1; gbkey CDS; inference COORDINATES: similar to AA sequence:RefSeq:NP_266215.1; product dihydrolipoyl dehydrogenase; transl_table 11; Name lpdA; gbkey Gene; gene_biotype protein_coding; locus_tag LLMG_RS00390; old_locus_tag llmg_0071; protein_id WP_011834174.1;
llmg_1122	gene1143	-1.23308	8.79271	-8.3058	2.70828e-05	0.000340755	2.69037	NC_009004.1	RefSeq	1082962	1084056	-	LLMG_RS05700;llmg_1122;	LLMG_RS05700	n	n	transcript_id gene1143; gene_id gene1143; gene_name LLMG_RS05700; Dbxref Genbank:WP_011835027.1; Name WP_011835027.1; gbkey CDS; inference COORDINATES: similar to AA sequence:RefSeq:NP_267485.1; product ABC transporter permease; transl_table 11; gbkey Gene; gene_biotype protein_coding; locus_tag LLMG_RS05700; old_locus_tag llmg_1122; protein_id WP_011835027.1;
llmg_0139	gene151	2.24036	9.18459	8.26782	2.8027e-05	0.000349347	2.89594	NC_009004.1	RefSeq	135270	136649	+	LLMG_RS00755;llmg_0139;	LLMG_RS00755	llm00220, llm00250	Arginine biosynthesis , Alanine, aspartate and glutamate metabolism	transcript_id gene151; gene_id gene151; gene_name argH; Dbxref Genbank:WP_011834236.1; Name WP_011834236.1; gbkey CDS; inference COORDINATES: similar to AA sequence:RefSeq:WP_015081877.1; product argininosuccinate lyase; transl_table 11; Name argH; gbkey Gene; gene_biotype protein_coding; locus_tag LLMG_RS00755; old_locus_tag llmg_0139; protein_id WP_011834236.1;
llmg_0339	gene351	-1.0557	8.05699	-8.23597	2.88468e-05	0.000354921	2.60565	NC_009004.1	RefSeq	326229	326999	+	LLMG_RS01745;llmg_0339;	LLMG_RS01745	llm00650	Butanoate metabolism	transcript_id gene351; gene_id gene351; gene_name LLMG_RS01745; Dbxref Genbank:WP_011834400.1; Name WP_011834400.1; gbkey CDS; inference COORDINATES: similar to AA sequence:RefSeq:WP_010498287.1; product 3-oxoacyl-ACP reductase; transl_table 11; gbkey Gene; gene_biotype protein_coding; locus_tag LLMG_RS01745; old_locus_tag llmg_0339; protein_id WP_011834400.1;
llmg_1317	gene1336	-2.28489	8.34755	-8.23152	2.89636e-05	0.000354921	2.67422	NC_009004.1	RefSeq	1288947	1289651	+	LLMG_RS06665;llmg_1317;	LLMG_RS06665	llm00520	Amino sugar and nucleotide sugar metabolism	transcript_id gene1336; gene_id gene1336; gene_name LLMG_RS06665; Dbxref Genbank:WP_011835192.1; Name WP_011835192.1; gbkey CDS; inference COORDINATES: similar to AA sequence:RefSeq:WP_011676172.1; product N-acetylmannosamine-6-phosphate 2-epimerase; transl_table 11; gbkey Gene; gene_biotype protein_coding; locus_tag LLMG_RS06665; old_locus_tag llmg_1317; protein_id WP_011835192.1;
llmg_1786	gene1789	-2.67714	11.9147	-8.22826	2.90494e-05	0.000354921	2.87952	NC_009004.1	RefSeq	1766543	1766764	-	LLMG_RS08960;llmg_1786;	LLMG_RS08960	n	n	transcript_id gene1789; gene_id gene1789; gene_name LLMG_RS08960; Dbxref Genbank:WP_003132501.1; Name WP_003132501.1; gbkey CDS; inference COORDINATES: similar to AA sequence:RefSeq:NP_266928.1; product acyl carrier protein; transl_table 11; gbkey Gene; gene_biotype protein_coding; locus_tag LLMG_RS08960; old_locus_tag llmg_1786; protein_id WP_003132501.1;
llmg_1951	gene1951	-1.49305	9.85737	-8.23095	2.89784e-05	0.000354921	2.72815	NC_009004.1	RefSeq	1932725	1933438	-	LLMG_RS09760;llmg_1951;	LLMG_RS09760	llm00190	Oxidative phosphorylation	transcript_id gene1951; gene_id gene1951; gene_name LLMG_RS09760; Dbxref Genbank:WP_011835693.1; Name WP_011835693.1; gbkey CDS; inference COORDINATES: similar to AA sequence:RefSeq:NP_267925.2; product F0F1 ATP synthase subunit A; transl_table 11; gbkey Gene; gene_biotype protein_coding; locus_tag LLMG_RS09760; old_locus_tag llmg_1951; protein_id WP_011835693.1;
llmg_0074	gene82	-1.76322	10.5497	-8.19515	2.99368e-05	0.000362177	2.79384	NC_009004.1	RefSeq	69478	70602	-	LLMG_RS00405;llmg_0074;	LLMG_RS00405	llm00010, llm00020, llm00620	Glycolysis / Gluconeogenesis , Citrate cycle (TCA cycle) , Pyruvate metabolism	transcript_id gene82; gene_id gene82; gene_name LLMG_RS00405; Dbxref Genbank:WP_011834177.1; Name WP_011834177.1; gbkey CDS; inference COORDINATES: similar to AA sequence:RefSeq:NP_266218.1; product thiamine pyrophosphate-dependent dehydrogenase E1 component subunit alpha; transl_table 11; gbkey Gene; gene_biotype protein_coding; locus_tag LLMG_RS00405; old_locus_tag llmg_0074; protein_id WP_0118…
llmg_0338	gene350	-1.26854	7.76697	-8.19824	2.98528e-05	0.000362177	2.59933	NC_009004.1	RefSeq	325297	326160	+	LLMG_RS01740;llmg_0338;	LLMG_RS01740	llm02010	ABC transporters	transcript_id gene350; gene_id gene350; gene_name LLMG_RS01740; Dbxref Genbank:WP_011834399.1; Name WP_011834399.1; gbkey CDS; inference COORDINATES: similar to AA sequence:RefSeq:NP_266476.1; product MetQ/NlpA family ABC transporter substrate-binding protein; transl_table 11; gbkey Gene; gene_biotype protein_coding; locus_tag LLMG_RS01740; old_locus_tag llmg_0338; protein_id WP_011834399.1;
llmg_0535	gene563	2.00251	7.94401	8.1181	3.2121e-05	0.000381839	2.61875	NC_009004.1	RefSeq	534350	535159	+	LLMG_RS02805;llmg_0535;	LLMG_RS02805	n	n	transcript_id gene563; gene_id gene563; gene_name LLMG_RS02805; Dbxref Genbank:WP_075070709.1; Name WP_075070709.1; gbkey CDS; inference COORDINATES: similar to AA sequence:RefSeq:NP_266719.1; product amino acid ABC transporter substrate-binding protein; transl_table 11; gbkey Gene; gene_biotype protein_coding; locus_tag LLMG_RS02805; old_locus_tag llmg_0535; protein_id WP_075070709.1;
llmg_1568	gene1580	-2.84191	9.36357	-8.12701	3.18596e-05	0.000381839	2.75007	NC_009004.1	RefSeq	1540757	1542661	-	LLMG_RS07900;llmg_1568;	LLMG_RS07900	llm00051, llm02060	Fructose and mannose metabolism , Phosphotransferase system (PTS)	transcript_id gene1580; gene_id gene1580; gene_name LLMG_RS07900; Dbxref Genbank:WP_011835402.1; Name WP_011835402.1; gbkey CDS; inference COORDINATES: similar to AA sequence:RefSeq:NP_267115.2; product PTS fructose transporter subunit IIC; transl_table 11; gbkey Gene; gene_biotype protein_coding; locus_tag LLMG_RS07900; old_locus_tag llmg_1568; protein_id WP_011835402.1;
llmg_1756	gene1760	2.85906	7.63451	8.11607	3.21809e-05	0.000381839	2.64935	NC_009004.1	RefSeq	1741357	1742490	-	LLMG_RS08825;llmg_1756;	LLMG_RS08825	llm00220, llm00300	Arginine biosynthesis , Lysine biosynthesis	transcript_id gene1760; gene_id gene1760; gene_name LLMG_RS08825; Dbxref Genbank:WP_011835543.1; Name WP_011835543.1; gbkey CDS; inference COORDINATES: similar to AA sequence:RefSeq:NP_266955.1; product acetylornithine transaminase; transl_table 11; gbkey Gene; gene_biotype protein_coding; locus_tag LLMG_RS08825; old_locus_tag llmg_1756; protein_id WP_011835543.1;
llmg_1981	gene1984	-1.69521	11.0586	-8.11667	3.2163e-05	0.000381839	2.72484	NC_009004.1	RefSeq	1962823	1966419	-	LLMG_RS09930;llmg_1981;	LLMG_RS09930	llm03020	RNA polymerase	transcript_id gene1984; gene_id gene1984; gene_name rpoC; Dbxref Genbank:WP_080506537.1; Name WP_080506537.1; gbkey CDS; inference COORDINATES: similar to AA sequence:RefSeq:NP_267956.1; product DNA-directed RNA polymerase subunit beta'; transl_table 11; Name rpoC; gbkey Gene; gene_biotype protein_coding; locus_tag LLMG_RS09930; old_locus_tag llmg_1981; protein_id WP_080506537.1;
llmg_1898	gene1897	-1.04516	8.38366	-8.04666	3.43044e-05	0.000405088	2.41982	NC_009004.1	RefSeq	1876584	1877477	-	LLMG_RS09500;llmg_1898;	LLMG_RS09500	llm02010	ABC transporters	transcript_id gene1897; gene_id gene1897; gene_name pstA; Dbxref Genbank:WP_011676713.1; Name WP_011676713.1; gbkey CDS; inference COORDINATES: similar to AA sequence:RefSeq:NP_267874.1; product phosphate ABC transporter%2C permease protein PstA; transl_table 11; Name pstA; gbkey Gene; gene_biotype protein_coding; locus_tag LLMG_RS09500; old_locus_tag llmg_1898; protein_id WP_011676713.1;
llmg_0208	gene221	-1.82988	7.76962	-8.03967	3.45267e-05	0.000405771	2.47714	NC_009004.1	RefSeq	196923	197177	+	LLMG_RS01100;llmg_0208;	LLMG_RS01100	n	n	transcript_id gene221; gene_id gene221; gene_name LLMG_RS01100; Dbxref Genbank:WP_011834291.1; Name WP_011834291.1; gbkey CDS; inference COORDINATES: similar to AA sequence:RefSeq:NP_266353.1; product hypothetical protein; transl_table 11; gbkey Gene; gene_biotype protein_coding; locus_tag LLMG_RS01100; old_locus_tag llmg_0208; protein_id WP_011834291.1;
llmg_1766	gene1770	1.42173	6.47935	8.02951	3.48528e-05	0.000407662	2.59483	NC_009004.1	RefSeq	1751131	1751694	+	LLMG_RS08870;llmg_1766;	LLMG_RS08870	n	n	transcript_id gene1770; gene_id gene1770; gene_name LLMG_RS08870; Dbxref Genbank:WP_050750510.1; Name WP_050750510.1; gbkey CDS; inference COORDINATES: similar to AA sequence:RefSeq:NP_266946.1; product N-acetyltransferase; transl_table 11; gbkey Gene; gene_biotype protein_coding; locus_tag LLMG_RS08870; old_locus_tag llmg_1766; protein_id WP_050750510.1;
llmg_1332	gene1352	1.11464	8.64225	8.0153	3.53145e-05	0.000411114	2.43506	NC_009004.1	RefSeq	1308229	1309515	-	LLMG_RS06750;llmg_1332;	LLMG_RS06750	llm00260, llm00270, llm00300	Glycine, serine and threonine metabolism , Cysteine and methionine metabolism , Lysine biosynthesis	transcript_id gene1352; gene_id gene1352; gene_name LLMG_RS06750; Dbxref Genbank:WP_011835205.1; Name WP_011835205.1; gbkey CDS; inference COORDINATES: similar to AA sequence:RefSeq:NP_267315.1; product homoserine dehydrogenase; transl_table 11; gbkey Gene; gene_biotype protein_coding; locus_tag LLMG_RS06750; old_locus_tag llmg_1332; protein_id WP_011835205.1;
llmg_0496	gene507	-2.07214	11.5049	-8.00988	3.54924e-05	0.000411245	2.64018	NC_009004.1	RefSeq	490275	490550	+	LLMG_RS02525;llmg_0496;	LLMG_RS02525	n	n	transcript_id gene507; gene_id gene507; gene_name LLMG_RS02525; Dbxref Genbank:WP_010905402.1; Name WP_010905402.1; gbkey CDS; inference COORDINATES: similar to AA sequence:RefSeq:WP_002950996.1; product DNA-binding protein HU; transl_table 11; gbkey Gene; gene_biotype protein_coding; locus_tag LLMG_RS02525; old_locus_tag llmg_0496; protein_id WP_010905402.1;
llmg_0335	gene348	-1.50576	8.2055	-7.98846	3.6205e-05	0.000417542	2.37843	NC_009004.1	RefSeq	323286	324146	+	LLMG_RS01730;llmg_0335;	LLMG_RS01730	llm02010	ABC transporters	transcript_id gene348; gene_id gene348; gene_name LLMG_RS01730; Dbxref Genbank:WP_011834397.1; Name WP_011834397.1; gbkey CDS; inference COORDINATES: similar to AA sequence:RefSeq:NP_266474.1; product MetQ/NlpA family ABC transporter substrate-binding protein; transl_table 11; gbkey Gene; gene_biotype protein_coding; locus_tag LLMG_RS01730; old_locus_tag llmg_0335; protein_id WP_011834397.1;
llmg_1138	gene1157	-2.09786	8.05573	-7.94535	3.76879e-05	0.000432622	2.37818	NC_009004.1	RefSeq	1103765	1104712	+	LLMG_RS05780;llmg_1138;	LLMG_RS05780	llm02010	ABC transporters	transcript_id gene1157; gene_id gene1157; gene_name LLMG_RS05780; Dbxref Genbank:WP_011835043.1; Name WP_011835043.1; gbkey CDS; inference COORDINATES: similar to AA sequence:RefSeq:NP_267472.1; product metal ABC transporter substrate-binding protein; transl_table 11; gbkey Gene; gene_biotype protein_coding; locus_tag LLMG_RS05780; old_locus_tag llmg_1138; protein_id WP_011835043.1;
llmg_0973	gene996	2.29876	7.22899	7.87247	4.03504e-05	0.000459254	2.45364	NC_009004.1	RefSeq	936877	937587	+	LLMG_RS04950;llmg_0973;	LLMG_RS04950	llm00230	Purine metabolism	transcript_id gene996; gene_id gene996; gene_name LLMG_RS04950; Dbxref Genbank:WP_011676479.1; Name WP_011676479.1; gbkey CDS; inference COORDINATES: similar to AA sequence:RefSeq:NP_267689.1; product phosphoribosylaminoimidazolesuccinocarboxamide synthase; transl_table 11; gbkey Gene; gene_biotype protein_coding; locus_tag LLMG_RS04950; old_locus_tag llmg_0973; protein_id WP_011676479.1;
llmg_2053	gene2050	-1.35504	9.73903	-7.87169	4.03801e-05	0.000459254	2.36287	NC_009004.1	RefSeq	2035603	2038401	-	LLMG_RS10255;llmg_2053;	LLMG_RS10255	llm00970	Aminoacyl-tRNA biosynthesis	transcript_id gene2050; gene_id gene2050; gene_name LLMG_RS10255; Dbxref Genbank:WP_011835768.1; Name WP_011835768.1; gbkey CDS; inference COORDINATES: similar to AA sequence:RefSeq:NP_268020.1; product isoleucine--tRNA ligase; transl_table 11; gbkey Gene; gene_biotype protein_coding; locus_tag LLMG_RS10255; old_locus_tag llmg_2053; protein_id WP_011835768.1;
llmg_1222	gene1239	1.91502	10.9365	7.8399	4.16069e-05	0.000471036	2.45535	NC_009004.1	RefSeq	1189818	1191104	+	LLMG_RS06175;llmg_1222;	LLMG_RS06175	llm02020	Two-component system	transcript_id gene1239; gene_id gene1239; gene_name dltD; Dbxref Genbank:WP_011676183.1; Name WP_011676183.1; gbkey CDS; inference COORDINATES: similar to AA sequence:RefSeq:WP_011676183.1; product D-alanyl-lipoteichoic acid biosynthesis protein DltD; transl_table 11; Name dltD; gbkey Gene; gene_biotype protein_coding; locus_tag LLMG_RS06175; old_locus_tag llmg_1222; protein_id WP_011676183.1;
llmg_1477	gene1493	-1.69456	9.33028	-7.80652	4.294e-05	0.000483908	2.25341	NC_009004.1	RefSeq	1450705	1452726	-	LLMG_RS07450;llmg_1477;	LLMG_RS07450	llm00970	Aminoacyl-tRNA biosynthesis	transcript_id gene1493; gene_id gene1493; gene_name LLMG_RS07450; Dbxref Genbank:WP_011835326.1; Name WP_011835326.1; gbkey CDS; inference COORDINATES: similar to AA sequence:RefSeq:NP_267252.1; product glycine--tRNA ligase subunit beta; transl_table 11; gbkey Gene; gene_biotype protein_coding; locus_tag LLMG_RS07450; old_locus_tag llmg_1477; protein_id WP_011835326.1;
llmg_0216	gene229	-1.42383	8.75536	-7.79478	4.34199e-05	0.000487093	2.18368	NC_009004.1	RefSeq	205049	206005	+	LLMG_RS01140;llmg_0216;	LLMG_RS01140	n	n	transcript_id gene229; gene_id gene229; gene_name LLMG_RS01140; Dbxref Genbank:WP_011834299.1; Name WP_011834299.1; gbkey CDS; inference COORDINATES: similar to AA sequence:RefSeq:WP_011834299.1; product glycosyltransferase family 2 protein; transl_table 11; gbkey Gene; gene_biotype protein_coding; locus_tag LLMG_RS01140; old_locus_tag llmg_0216; protein_id WP_011834299.1;
llmg_1429	gene1445	-1.81175	7.51461	-7.77455	4.4261e-05	0.000494281	2.19606	NC_009004.1	RefSeq	1396766	1397737	-	LLMG_RS07210;llmg_1429;	LLMG_RS07210	llm00010, llm00270, llm00620, llm00640	Glycolysis / Gluconeogenesis , Cysteine and methionine metabolism , Pyruvate metabolism , Propanoate metabolism	transcript_id gene1445; gene_id gene1445; gene_name LLMG_RS07210; Dbxref Genbank:WP_011676241.1; Name WP_011676241.1; gbkey CDS; inference COORDINATES: similar to AA sequence:RefSeq:NP_267284.1; product L-lactate dehydrogenase; transl_table 11; gbkey Gene; gene_biotype protein_coding; locus_tag LLMG_RS07210; old_locus_tag llmg_1429; protein_id WP_011676241.1;
llmg_0419	gene431	-1.21647	8.28202	-7.75361	4.51505e-05	0.000500153	2.12452	NC_009004.1	RefSeq	411891	412766	+	LLMG_RS02145;llmg_0419;	LLMG_RS02145	n	n	transcript_id gene431; gene_id gene431; gene_name rsmI; Dbxref Genbank:WP_011834466.1; Name WP_011834466.1; gbkey CDS; inference COORDINATES: similar to AA sequence:RefSeq:NP_266558.2; product 16S rRNA (cytidine(1402)-2'-O)-methyltransferase; transl_table 11; Name rsmI; gbkey Gene; gene_biotype protein_coding; locus_tag LLMG_RS02145; old_locus_tag llmg_0419; protein_id WP_011834466.1;
llmg_1950	gene1950	-1.58871	8.95271	-7.75264	4.51921e-05	0.000500153	2.16234	NC_009004.1	RefSeq	1932204	1932710	-	LLMG_RS09755;llmg_1950;	LLMG_RS09755	llm00190	Oxidative phosphorylation	transcript_id gene1950; gene_id gene1950; gene_name atpF; Dbxref Genbank:WP_010906128.1; Name WP_010906128.1; gbkey CDS; inference COORDINATES: similar to AA sequence:RefSeq:NP_267924.1; product ATP synthase subunit B; transl_table 11; Name atpF; gbkey Gene; gene_biotype protein_coding; locus_tag LLMG_RS09755; old_locus_tag llmg_1950; protein_id WP_010906128.1;
llmg_0217	gene230	-1.41945	9.44866	-7.73922	4.57733e-05	0.000502082	2.18057	NC_009004.1	RefSeq	205995	207761	+	LLMG_RS01145;llmg_0217;	LLMG_RS01145	n	n	transcript_id gene230; gene_id gene230; gene_name LLMG_RS01145; Dbxref Genbank:WP_011834300.1; Name WP_011834300.1; gbkey CDS; inference COORDINATES: similar to AA sequence:RefSeq:WP_011675430.1; product LPS biosynthesis protein; transl_table 11; gbkey Gene; gene_biotype protein_coding; locus_tag LLMG_RS01145; old_locus_tag llmg_0217; protein_id WP_011834300.1;
llmg_1276	gene1297	1.66249	7.62373	7.73938	4.57662e-05	0.000502082	2.24098	NC_009004.1	RefSeq	1245506	1246756	-	LLMG_RS06470;llmg_1276;	LLMG_RS06470	llm00260, llm00290	Glycine, serine and threonine metabolism , Valine, leucine and isoleucine biosynthesis	transcript_id gene1297; gene_id gene1297; gene_name LLMG_RS06470; Dbxref Genbank:WP_011835155.1; Name WP_011835155.1; Note catalyzes the formation of 2-oxobutanoate from L-threonine%3B biosynthetic; gbkey CDS; inference COORDINATES: similar to AA sequence:RefSeq:NP_267383.1; product threonine dehydratase; transl_table 11; gbkey Gene; gene_biotype protein_coding; locus_tag LLMG_RS06470; old_locus_…
llmg_0932	gene957	-2.03925	10.6289	-7.72408	4.64386e-05	0.000507126	2.29858	NC_009004.1	RefSeq	902434	902706	+	LLMG_RS04755;llmg_0932;	LLMG_RS04755	llm03010	Ribosome	transcript_id gene957; gene_id gene957; gene_name LLMG_RS04755; Dbxref Genbank:WP_011834878.1; Name WP_011834878.1; gbkey CDS; inference COORDINATES: similar to AA sequence:RefSeq:WP_002884675.1; product 30S ribosomal protein S16; transl_table 11; gbkey Gene; gene_biotype protein_coding; locus_tag LLMG_RS04755; old_locus_tag llmg_0932; protein_id WP_011834878.1;
llmg_0112	gene121	-1.08794	7.72428	-7.71279	4.69419e-05	0.000508126	2.10062	NC_009004.1	RefSeq	104640	105596	+	LLMG_RS00600;llmg_0112;	LLMG_RS00600	n	n	transcript_id gene121; gene_id gene121; gene_name LLMG_RS00600; Dbxref Genbank:WP_011834211.1; Name WP_011834211.1; gbkey CDS; inference COORDINATES: similar to AA sequence:RefSeq:NP_266261.1; product polysaccharide deacetylase family protein; transl_table 11; gbkey Gene; gene_biotype protein_coding; locus_tag LLMG_RS00600; old_locus_tag llmg_0112; protein_id WP_011834211.1;
llmg_1031	gene1052	-1.43685	6.45543	-7.71615	4.67917e-05	0.000508126	2.31002	NC_009004.1	RefSeq	996231	996812	+	LLMG_RS05240;llmg_1031;	LLMG_RS05240	llm00400, llm02024	Phenylalanine, tyrosine and tryptophan biosynthesis , Quorum sensing	transcript_id gene1052; gene_id gene1052; gene_name LLMG_RS05240; Dbxref Genbank:WP_011834958.1; Name WP_011834958.1; gbkey CDS; inference COORDINATES: similar to AA sequence:RefSeq:NP_267625.1; product type 1 glutamine amidotransferase; transl_table 11; gbkey Gene; gene_biotype protein_coding; locus_tag LLMG_RS05240; old_locus_tag llmg_1031; protein_id WP_011834958.1;
llmg_0296	gene311	-2.5337	9.05955	-7.69403	4.77919e-05	0.000515067	2.13847	NC_009004.1	RefSeq	285418	286029	+	LLMG_RS01550;llmg_0296;	LLMG_RS01550	llm03010	Ribosome	transcript_id gene311; gene_id gene311; gene_name LLMG_RS01550; Dbxref Genbank:WP_011675319.1; Name WP_011675319.1; gbkey CDS; inference COORDINATES: similar to AA sequence:RefSeq:WP_014407971.1; product 30S ribosomal protein S4; transl_table 11; gbkey Gene; gene_biotype protein_coding; locus_tag LLMG_RS01550; old_locus_tag llmg_0296; protein_id WP_011675319.1;
llmg_1181	gene1198	1.46971	9.3884	7.68299	4.82997e-05	0.000518277	2.13462	NC_009004.1	RefSeq	1149457	1150479	+	LLMG_RS05980;llmg_1181;	LLMG_RS05980	llm00270, llm00280, llm00290, llm00770	Cysteine and methionine metabolism , Valine, leucine and isoleucine degradation , Valine, leucine and isoleucine biosynthesis , Pantothenate and CoA biosynthesis	transcript_id gene1198; gene_id gene1198; gene_name LLMG_RS05980; Dbxref Genbank:WP_011835082.1; Name WP_011835082.1; gbkey CDS; inference COORDINATES: similar to AA sequence:RefSeq:NP_267444.1; product branched-chain amino acid aminotransferase; transl_table 11; gbkey Gene; gene_biotype protein_coding; locus_tag LLMG_RS05980; old_locus_tag llmg_1181; protein_id WP_011835082.1;
llmg_1949	gene1949	-1.64176	8.32557	-7.66651	4.90689e-05	0.000524251	2.0557	NC_009004.1	RefSeq	1931675	1932202	-	LLMG_RS09750;llmg_1949;	LLMG_RS09750	llm00190	Oxidative phosphorylation	transcript_id gene1949; gene_id gene1949; gene_name LLMG_RS09750; Dbxref Genbank:WP_011835692.1; Name WP_011835692.1; gbkey CDS; inference COORDINATES: similar to AA sequence:RefSeq:NP_267923.1; product ATP synthase subunit delta; transl_table 11; gbkey Gene; gene_biotype protein_coding; locus_tag LLMG_RS09750; old_locus_tag llmg_1949; protein_id WP_011835692.1;
llmg_0207	gene220	-1.43283	8.26104	-7.59955	5.23377e-05	0.000556765	1.97366	NC_009004.1	RefSeq	196330	196923	+	LLMG_RS01095;llmg_0207;	LLMG_RS01095	llm00521, llm00523	Streptomycin biosynthesis , Polyketide sugar unit biosynthesis	transcript_id gene220; gene_id gene220; gene_name LLMG_RS01095; Dbxref Genbank:WP_011834290.1; Name WP_011834290.1; gbkey CDS; inference COORDINATES: similar to AA sequence:RefSeq:NP_266352.1; product dTDP-4-dehydrorhamnose 3%2C5-epimerase; transl_table 11; gbkey Gene; gene_biotype protein_coding; locus_tag LLMG_RS01095; old_locus_tag llmg_0207; protein_id WP_011834290.1;
llmg_1279	gene1300	1.62637	7.82173	7.55243	5.47817e-05	0.000577783	2.0262	NC_009004.1	RefSeq	1248351	1250075	-	LLMG_RS06485;llmg_1279;	LLMG_RS06485	llm00290, llm00650, llm00660, llm00770	Valine, leucine and isoleucine biosynthesis , Butanoate metabolism , C5-Branched dibasic acid metabolism , Pantothenate and CoA biosynthesis	transcript_id gene1300; gene_id gene1300; gene_name ilvB; Dbxref Genbank:WP_011835158.1; Name WP_011835158.1; gbkey CDS; inference COORDINATES: similar to AA sequence:RefSeq:WP_003131132.1; product acetolactate synthase%2C large subunit%2C biosynthetic type; transl_table 11; Name ilvB; gbkey Gene; gene_biotype protein_coding; locus_tag LLMG_RS06485; old_locus_tag llmg_1279; protein_id WP_01183515…
LLMG_RS06785	gene1359	-1.44536	8.86317	-7.55596	5.45941e-05	0.000577783	1.94936	NC_009004.1	RefSeq	1314868	1315455	-	gene_synonymyihA,ysxC;LLMG_RS06785;llmg_1339;	LLMG_RS06785	n	n	transcript_id gene1359; gene_id gene1359; gene_name engB; Dbxref Genbank:WP_011676272.1; Name WP_011676272.1; Note binds guanine nucleotides%3B in Escherichia coli depletion results in defective cell division and filamentation%3B in Bacillus subtilis this gene is essential; gbkey CDS; inference COORDINATES: similar to AA sequence:RefSeq:NP_267308.1; product GTP-binding protein; transl_table 11; N…
llmg_0781	gene811	1.43201	7.30555	7.50983	5.71002e-05	0.000599674	1.97371	NC_009004.1	RefSeq	770287	770490	+	LLMG_RS04025;llmg_0781;	LLMG_RS04025	n	n	transcript_id gene811; gene_id gene811; gene_name LLMG_RS04025; Dbxref Genbank:WP_011676547.1; Name WP_011676547.1; gbkey CDS; inference COORDINATES: similar to AA sequence:RefSeq:NP_267799.1; product DUF2969 domain-containing protein; transl_table 11; gbkey Gene; gene_biotype protein_coding; locus_tag LLMG_RS04025; old_locus_tag llmg_0781; protein_id WP_011676547.1;
llmg_0343	gene355	-1.15025	7.49687	-7.49661	5.78418e-05	0.000604888	1.91384	NC_009004.1	RefSeq	329843	330391	+	LLMG_RS01765;llmg_0343;	LLMG_RS01765	n	n	transcript_id gene355; gene_id gene355; gene_name LLMG_RS01765; Dbxref Genbank:WP_011834403.1; Name WP_011834403.1; gbkey CDS; inference COORDINATES: similar to AA sequence:RefSeq:NP_266480.1; product DUF3816 family protein; transl_table 11; gbkey Gene; gene_biotype protein_coding; locus_tag LLMG_RS01765; old_locus_tag llmg_0343; protein_id WP_011834403.1;
llmg_0145	gene157	-1.52458	8.40426	-7.48163	5.86947e-05	0.000611218	1.85519	NC_009004.1	RefSeq	141079	141213	+	LLMG_RS00785;llmg_0145;	LLMG_RS00785	llm03010	Ribosome	transcript_id gene157; gene_id gene157; gene_name LLMG_RS00785; Dbxref Genbank:WP_003131818.1; Name WP_003131818.1; gbkey CDS; inference COORDINATES: similar to AA sequence:RefSeq:NP_266287.1; product 50S ribosomal protein L34; transl_table 11; gbkey Gene; gene_biotype protein_coding; locus_tag LLMG_RS00785; old_locus_tag llmg_0145; protein_id WP_003131818.1;
llmg_1280	gene1301	1.5423	7.84798	7.46723	5.95281e-05	0.000617292	1.92286	NC_009004.1	RefSeq	1250090	1251802	-	LLMG_RS06490;llmg_1280;	LLMG_RS06490	llm00290, llm00770	Valine, leucine and isoleucine biosynthesis , Pantothenate and CoA biosynthesis	transcript_id gene1301; gene_id gene1301; gene_name ilvD; Dbxref Genbank:WP_011835159.1; Name WP_011835159.1; gbkey CDS; inference COORDINATES: similar to AA sequence:RefSeq:NP_267379.1; product dihydroxy-acid dehydratase; transl_table 11; Name ilvD; gbkey Gene; gene_biotype protein_coding; locus_tag LLMG_RS06490; old_locus_tag llmg_1280; protein_id WP_011835159.1;
llmg_1227	gene1244	1.38264	7.34574	7.4628	5.97867e-05	0.000617379	1.99195	NC_009004.1	RefSeq	1198699	1199721	+	LLMG_RS06200;llmg_1227;	LLMG_RS06200	llm00400, llm02024	Phenylalanine, tyrosine and tryptophan biosynthesis , Quorum sensing	transcript_id gene1244; gene_id gene1244; gene_name LLMG_RS06200; Dbxref Genbank:WP_011835116.1; Name WP_011835116.1; gbkey CDS; inference COORDINATES: similar to AA sequence:RefSeq:NP_267409.1; product 3-deoxy-7-phosphoheptulonate synthase; transl_table 11; gbkey Gene; gene_biotype protein_coding; locus_tag LLMG_RS06200; old_locus_tag llmg_1227; protein_id WP_011835116.1;
llmg_0013	gene11	-1.29577	9.74439	-7.43882	6.121e-05	0.000626831	1.92484	NC_009004.1	RefSeq	15003	18545	+	LLMG_RS00060;llmg_0013;	LLMG_RS00060	llm03420	Nucleotide excision repair	transcript_id gene11; gene_id gene11; gene_name mfd; Dbxref Genbank:WP_011834129.1; Name WP_011834129.1; gbkey CDS; inference COORDINATES: similar to AA sequence:RefSeq:WP_014571757.1; product transcription-repair coupling factor; transl_table 11; Name mfd; gbkey Gene; gene_biotype protein_coding; locus_tag LLMG_RS00060; old_locus_tag llmg_0013; protein_id WP_011834129.1;
llmg_0519	gene530	-2.16951	10.7475	-7.4423	6.10012e-05	0.000626831	2.01662	NC_009004.1	RefSeq	509736	511019	+	LLMG_RS02640;llmg_0519;	LLMG_RS02640	n	n	transcript_id gene530; gene_id gene530; gene_name LLMG_RS02640; Dbxref Genbank:WP_011834555.1; Name WP_011834555.1; gbkey CDS; inference COORDINATES: similar to AA sequence:RefSeq:NP_266707.1; product trigger factor; transl_table 11; gbkey Gene; gene_biotype protein_coding; locus_tag LLMG_RS02640; old_locus_tag llmg_0519; protein_id WP_011834555.1;
llmg_1136	gene1155	-1.79726	7.40183	-7.38698	6.44168e-05	0.000656945	1.84718	NC_009004.1	RefSeq	1102206	1102919	+	LLMG_RS05770;llmg_1136;	LLMG_RS05770	llm02010	ABC transporters	transcript_id gene1155; gene_id gene1155; gene_name LLMG_RS05770; Dbxref Genbank:WP_011835041.1; Name WP_011835041.1; gbkey CDS; inference COORDINATES: similar to AA sequence:RefSeq:NP_267474.1; product metal ABC transporter ATP-binding protein; transl_table 11; gbkey Gene; gene_biotype protein_coding; locus_tag LLMG_RS05770; old_locus_tag llmg_1136; protein_id WP_011835041.1;
llmg_0977	gene1000	1.91391	7.35925	7.3623	6.60085e-05	0.000670407	1.93367	NC_009004.1	RefSeq	941072	942526	+	LLMG_RS04970;llmg_0977;	LLMG_RS04970	llm00230, llm00250	Purine metabolism , Alanine, aspartate and glutamate metabolism	transcript_id gene1000; gene_id gene1000; gene_name LLMG_RS04970; Dbxref Genbank:WP_042211555.1; Name WP_042211555.1; gbkey CDS; inference COORDINATES: similar to AA sequence:RefSeq:WP_014024959.1; product amidophosphoribosyltransferase; transl_table 11; gbkey Gene; gene_biotype protein_coding; locus_tag LLMG_RS04970; old_locus_tag llmg_0977; protein_id WP_042211555.1;
llmg_2471	gene2484	-1.0966	8.59919	-7.34263	6.7308e-05	0.000680804	1.7073	NC_009004.1	RefSeq	2429612	2429920	+	LLMG_RS12415;llmg_2471;	LLMG_RS12415	n	n	transcript_id gene2484; gene_id gene2484; gene_name LLMG_RS12415; Dbxref Genbank:WP_011836103.1; Name WP_011836103.1; gbkey CDS; inference COORDINATES: similar to AA sequence:RefSeq:NP_268344.1; product hypothetical protein; transl_table 11; gbkey Gene; gene_biotype protein_coding; locus_tag LLMG_RS12415; old_locus_tag llmg_2471; protein_id WP_011836103.1;
llmg_1493	gene1509	-2.67889	10.5356	-7.33043	6.81285e-05	0.00068629	1.86994	NC_009004.1	RefSeq	1464885	1465199	-	LLMG_RS07530;llmg_1493;	LLMG_RS07530	llm03010	Ribosome	transcript_id gene1509; gene_id gene1509; gene_name rplU; Dbxref Genbank:WP_003130644.1; Name WP_003130644.1; gbkey CDS; inference COORDINATES: similar to AA sequence:RefSeq:NP_267235.1; product 50S ribosomal protein L21; transl_table 11; Name rplU; gbkey Gene; gene_biotype protein_coding; locus_tag LLMG_RS07530; old_locus_tag llmg_1493; protein_id WP_003130644.1;
llmg_0141	gene153	1.25605	6.33245	7.31321	6.93049e-05	0.000695303	1.82969	NC_009004.1	RefSeq	138054	138629	+	LLMG_RS00765;llmg_0141;	LLMG_RS00765	n	n	transcript_id gene153; gene_id gene153; gene_name LLMG_RS00765; Dbxref Genbank:WP_011675184.1; Name WP_011675184.1; gbkey CDS; inference COORDINATES: similar to AA sequence:RefSeq:NP_266283.1; product TetR/AcrR family transcriptional regulator; transl_table 11; gbkey Gene; gene_biotype protein_coding; locus_tag LLMG_RS00765; old_locus_tag llmg_0141; protein_id WP_011675184.1;
llmg_2172	gene2182	-1.75292	8.56958	-7.27941	7.16803e-05	0.000716222	1.68446	NC_009004.1	RefSeq	2141256	2141864	-	LLMG_RS10915;llmg_2172;	LLMG_RS10915	n	n	transcript_id gene2182; gene_id gene2182; gene_name LLMG_RS10915; Dbxref Genbank:WP_011835872.1; Name WP_011835872.1; gbkey CDS; inference COORDINATES: similar to AA sequence:RefSeq:NP_268070.1; product hypothetical protein; transl_table 11; gbkey Gene; gene_biotype protein_coding; locus_tag LLMG_RS10915; old_locus_tag llmg_2172; protein_id WP_011835872.1;
llmg_1193	gene1210	-1.52378	7.7264	-7.26821	7.24874e-05	0.000721367	1.64522	NC_009004.1	RefSeq	1163041	1163607	+	LLMG_RS06040;llmg_1193;	LLMG_RS06040	n	n	transcript_id gene1210; gene_id gene1210; gene_name scpB; Dbxref Genbank:WP_011676203.1; Name WP_011676203.1; Note functions during chromosome segregation%3B may form a condensin-like structure with SMC and ScpA%3B forms a homodimer; gbkey CDS; inference COORDINATES: similar to AA sequence:RefSeq:NP_267432.2; product segregation/condensation protein B; transl_table 11; Name scpB; gbkey Gene; gene…
llmg_0152	gene164	-1.57536	9.82341	-7.26369	7.28157e-05	0.000721724	1.75543	NC_009004.1	RefSeq	144865	145188	+	LLMG_RS00815;llmg_0152;	LLMG_RS00815	n	n	transcript_id gene164; gene_id gene164; gene_name LLMG_RS00815; Dbxref Genbank:WP_003131822.1; Name WP_003131822.1; gbkey CDS; inference COORDINATES: similar to AA sequence:RefSeq:NP_266300.1; product DUF1292 domain-containing protein; transl_table 11; gbkey Gene; gene_biotype protein_coding; locus_tag LLMG_RS00815; old_locus_tag llmg_0152; protein_id WP_003131822.1;
llmg_1833	gene1833	-1.06829	7.38412	-7.25049	7.37841e-05	0.000728396	1.65843	NC_009004.1	RefSeq	1814062	1815174	+	LLMG_RS09180;llmg_1833;	LLMG_RS09180	llm00130	Ubiquinone and other terpenoid-quinone biosynthesis	transcript_id gene1833; gene_id gene1833; gene_name menC; Dbxref Genbank:WP_011835603.1; Name WP_011835603.1; gbkey CDS; inference COORDINATES: similar to AA sequence:RefSeq:WP_015082190.1; product o-succinylbenzoate synthase; transl_table 11; Name menC; gbkey Gene; gene_biotype protein_coding; locus_tag LLMG_RS09180; old_locus_tag llmg_1833; protein_id WP_011835603.1;
llmg_0607	gene634	-2.29296	7.23724	-7.21885	7.61644e-05	0.000747691	1.70415	NC_009004.1	RefSeq	595890	596402	+	LLMG_RS03160;llmg_0607;	LLMG_RS03160	llm00230	Purine metabolism	transcript_id gene634; gene_id gene634; gene_name LLMG_RS03160; Dbxref Genbank:WP_011834623.1; Name WP_011834623.1; gbkey CDS; inference COORDINATES: similar to AA sequence:RefSeq:WP_003135164.1; product adenine phosphoribosyltransferase; transl_table 11; gbkey Gene; gene_biotype protein_coding; locus_tag LLMG_RS03160; old_locus_tag llmg_0607; protein_id WP_011834623.1;
llmg_1492	gene1508	-2.56561	10.9327	-7.21256	7.66474e-05	0.000747691	1.775	NC_009004.1	RefSeq	1464547	1464882	-	LLMG_RS07525;llmg_1492;	LLMG_RS07525	n	n	transcript_id gene1508; gene_id gene1508; gene_name LLMG_RS07525; Dbxref Genbank:WP_011676089.1; Name WP_011676089.1; gbkey CDS; inference COORDINATES: similar to AA sequence:RefSeq:NP_267236.1; product ribosomal-processing cysteine protease Prp; transl_table 11; gbkey Gene; gene_biotype protein_coding; locus_tag LLMG_RS07525; old_locus_tag llmg_1492; protein_id WP_011676089.1;
llmg_1780	gene1783	-1.61417	4.83243	-7.21321	7.65974e-05	0.000747691	1.9337	NC_009004.1	RefSeq	1761771	1761953	-	LLMG_RS13240;llmg_1780;	LLMG_RS13240	n	n	transcript_id gene1783; gene_id gene1783; gene_name LLMG_RS13240; Dbxref Genbank:WP_003132513.1; Name WP_003132513.1; gbkey CDS; inference COORDINATES: similar to AA sequence:RefSeq:WP_003132513.1; product hypothetical protein; transl_table 11; gbkey Gene; gene_biotype protein_coding; locus_tag LLMG_RS13240; old_locus_tag llmg_1780; protein_id WP_003132513.1;
llmg_0606	gene633	-1.08289	9.53061	-7.19729	7.78347e-05	0.000756283	1.63575	NC_009004.1	RefSeq	593538	595766	+	LLMG_RS03155;llmg_0606;	LLMG_RS03155	llm03410, llm03430, llm03440	Base excision repair , Mismatch repair , Homologous recombination	transcript_id gene633; gene_id gene633; gene_name recJ; Dbxref Genbank:WP_011834622.1; Name WP_011834622.1; gbkey CDS; inference COORDINATES: similar to AA sequence:RefSeq:NP_266788.1; product single-stranded-DNA-specific exonuclease RecJ; transl_table 11; Name recJ; gbkey Gene; gene_biotype protein_coding; locus_tag LLMG_RS03155; old_locus_tag llmg_0606; protein_id WP_011834622.1;
llmg_2078	gene2073	-2.19401	10.2157	-7.17984	7.92164e-05	0.00076669	1.66742	NC_009004.1	RefSeq	2058720	2058989	-	LLMG_RS10370;llmg_2078;	LLMG_RS10370	llm03010	Ribosome	transcript_id gene2073; gene_id gene2073; gene_name LLMG_RS10370; Dbxref Genbank:WP_010906184.1; Name WP_010906184.1; gbkey CDS; inference COORDINATES: similar to AA sequence:RefSeq:NP_268043.1; product 30S ribosomal protein S15; transl_table 11; gbkey Gene; gene_biotype protein_coding; locus_tag LLMG_RS10370; old_locus_tag llmg_2078; protein_id WP_010906184.1;
llmg_2512	gene2525	-1.41662	8.39839	-7.16654	8.02876e-05	0.000774022	1.51259	NC_009004.1	RefSeq	2466928	2467611	-	LLMG_RS12620;llmg_2512;	LLMG_RS12620	n	n	transcript_id gene2525; gene_id gene2525; gene_name LLMG_RS12620; Dbxref Genbank:WP_011836134.1; Name WP_011836134.1; gbkey CDS; inference COORDINATES: similar to AA sequence:RefSeq:NP_268391.1; product Crp/Fnr family transcriptional regulator; transl_table 11; gbkey Gene; gene_biotype protein_coding; locus_tag LLMG_RS12620; old_locus_tag llmg_2512; protein_id WP_011836134.1;
llmg_1026	gene1047	-1.09164	8.63417	-7.15599	8.11485e-05	0.000777758	1.52152	NC_009004.1	RefSeq	992059	992802	+	LLMG_RS05215;llmg_1026;	LLMG_RS05215	n	n	transcript_id gene1047; gene_id gene1047; gene_name LLMG_RS05215; Dbxref Genbank:WP_011834954.1; Name WP_011834954.1; gbkey CDS; inference COORDINATES: similar to AA sequence:RefSeq:NP_267629.1; product methyltransferase domain-containing protein; transl_table 11; gbkey Gene; gene_biotype protein_coding; locus_tag LLMG_RS05215; old_locus_tag llmg_1026; protein_id WP_011834954.1;
llmg_1131	gene1150	-1.60339	8.75389	-7.15408	8.13053e-05	0.000777758	1.53717	NC_009004.1	RefSeq	1095546	1096484	+	LLMG_RS05745;llmg_1131;	LLMG_RS05745	llm00770	Pantothenate and CoA biosynthesis	transcript_id gene1150; gene_id gene1150; gene_name LLMG_RS05745; Dbxref Genbank:WP_011835036.1; Name WP_011835036.1; gbkey CDS; inference COORDINATES: similar to AA sequence:RefSeq:NP_267479.1; product 2-dehydropantoate 2-reductase; transl_table 11; gbkey Gene; gene_biotype protein_coding; locus_tag LLMG_RS05745; old_locus_tag llmg_1131; protein_id WP_011835036.1;
llmg_1194	gene1211	-1.04898	8.23926	-7.1055	8.54129e-05	0.000813896	1.42652	NC_009004.1	RefSeq	1163594	1164313	+	LLMG_RS06045;llmg_1194;	LLMG_RS06045	n	n	transcript_id gene1211; gene_id gene1211; gene_name LLMG_RS06045; Dbxref Genbank:WP_014735014.1; Name WP_014735014.1; gbkey CDS; inference COORDINATES: similar to AA sequence:RefSeq:WP_014735014.1; product rRNA pseudouridine synthase; transl_table 11; gbkey Gene; gene_biotype protein_coding; locus_tag LLMG_RS06045; old_locus_tag llmg_1194; protein_id WP_014735014.1;
llmg_0327	gene340	-1.51024	6.56458	-7.10155	8.57567e-05	0.000814029	1.68344	NC_009004.1	RefSeq	316311	316529	+	LLMG_RS01690;llmg_0327;	LLMG_RS01690	n	n	transcript_id gene340; gene_id gene340; gene_name LLMG_RS01690; Dbxref Genbank:WP_003131683.1; Name WP_003131683.1; gbkey CDS; inference COORDINATES: similar to AA sequence:RefSeq:NP_266469.1; product hypothetical protein; transl_table 11; gbkey Gene; gene_biotype protein_coding; locus_tag LLMG_RS01690; old_locus_tag llmg_0327; protein_id WP_003131683.1;
llmg_0438	gene448	-2.99769	8.20025	-7.09451	8.63738e-05	0.000815945	1.52365	NC_009004.1	RefSeq	428806	429156	+	LLMG_RS02230;llmg_0438;	LLMG_RS02230	llm00500, llm02060	Starch and sucrose metabolism , Phosphotransferase system (PTS)	transcript_id gene448; gene_id gene448; gene_name LLMG_RS02230; Dbxref Genbank:WP_011675489.1; Name WP_011675489.1; gbkey CDS; inference COORDINATES: similar to AA sequence:RefSeq:NP_266570.1; product PTS lactose/cellobiose transporter subunit IIA; transl_table 11; gbkey Gene; gene_biotype protein_coding; locus_tag LLMG_RS02230; old_locus_tag llmg_0438; protein_id WP_011675489.1;
llmg_1804	gene1805	1.11007	6.9586	7.09172	8.66198e-05	0.000815945	1.56158	NC_009004.1	RefSeq	1785382	1786230	-	LLMG_RS09040;llmg_1804;	LLMG_RS09040	n	n	transcript_id gene1805; gene_id gene1805; gene_name LLMG_RS09040; Dbxref Genbank:WP_011835579.1; Name WP_011835579.1; gbkey CDS; inference COORDINATES: similar to AA sequence:RefSeq:WP_011835579.1; product helix-turn-helix domain-containing protein; transl_table 11; gbkey Gene; gene_biotype protein_coding; locus_tag LLMG_RS09040; old_locus_tag llmg_1804; protein_id WP_011835579.1;
llmg_0635	gene662	2.00137	6.95623	7.06823	8.87195e-05	0.000832546	1.58317	NC_009004.1	RefSeq	628261	629586	+	LLMG_RS03315;llmg_0635;	LLMG_RS03315	llm00020, llm00630	Citrate cycle (TCA cycle) , Glyoxylate and dicarboxylate metabolism	transcript_id gene662; gene_id gene662; gene_name LLMG_RS03315; Dbxref Genbank:WP_011834644.1; Name WP_011834644.1; Note catalyzes the formation of citrate from acetyl-CoA and oxaloacetate; gbkey CDS; inference COORDINATES: similar to AA sequence:RefSeq:WP_012897353.1; product citrate/2-methylcitrate synthase; transl_table 11; gbkey Gene; gene_biotype protein_coding; locus_tag LLMG_RS03315; old_l…
llmg_0467	gene477	-1.61269	9.37411	-7.05623	8.98144e-05	0.00083646	1.47423	NC_009004.1	RefSeq	461021	462628	+	LLMG_RS02375;llmg_0467;	LLMG_RS02375	llm00240	Pyrimidine metabolism	transcript_id gene477; gene_id gene477; gene_name LLMG_RS02375; Dbxref Genbank:WP_011834508.1; Name WP_011834508.1; gbkey CDS; inference COORDINATES: similar to AA sequence:RefSeq:NP_266647.1; product CTP synthetase; transl_table 11; gbkey Gene; gene_biotype protein_coding; locus_tag LLMG_RS02375; old_locus_tag llmg_0467; protein_id WP_011834508.1;
llmg_1832	gene1832	-1.01917	7.69315	-7.05745	8.97025e-05	0.00083646	1.40014	NC_009004.1	RefSeq	1812710	1814065	+	LLMG_RS09175;llmg_1832;	LLMG_RS09175	llm00130	Ubiquinone and other terpenoid-quinone biosynthesis	transcript_id gene1832; gene_id gene1832; gene_name menE; Dbxref Genbank:WP_011835602.1; Name WP_011835602.1; gbkey CDS; inference COORDINATES: similar to AA sequence:RefSeq:WP_011835602.1; product o-succinylbenzoate--CoA ligase; transl_table 11; Name menE; gbkey Gene; gene_biotype protein_coding; locus_tag LLMG_RS09175; old_locus_tag llmg_1832; protein_id WP_011835602.1;
llmg_2446	gene2455	1.26002	7.59406	7.03731	9.15707e-05	0.000849611	1.44989	NC_009004.1	RefSeq	2397414	2398640	-	LLMG_RS12275;llmg_2446;	LLMG_RS12275	n	n	transcript_id gene2455; gene_id gene2455; gene_name LLMG_RS12275; Dbxref Genbank:WP_011836081.1; Name WP_011836081.1; gbkey CDS; inference COORDINATES: similar to AA sequence:RefSeq:NP_268322.1; product MFS transporter; transl_table 11; gbkey Gene; gene_biotype protein_coding; locus_tag LLMG_RS12275; old_locus_tag llmg_2446; protein_id WP_011836081.1;
llmg_0768	gene800	-1.28367	8.11783	-7.02261	9.29613e-05	0.000859282	1.34304	NC_009004.1	RefSeq	757470	758474	+	LLMG_RS03970;llmg_0768;	LLMG_RS03970	llm03030, llm03430, llm03440	DNA replication , Mismatch repair , Homologous recombination	transcript_id gene800; gene_id gene800; gene_name LLMG_RS03970; Dbxref Genbank:WP_011834752.1; Name WP_011834752.1; gbkey CDS; inference COORDINATES: similar to AA sequence:RefSeq:NP_267810.1; product DNA polymerase III subunit delta; transl_table 11; gbkey Gene; gene_biotype protein_coding; locus_tag LLMG_RS03970; old_locus_tag llmg_0768; protein_id WP_011834752.1;
llmg_0553	gene577	-2.21729	5.92021	-6.95784	9.93714e-05	0.000911705	1.57718	NC_009004.1	RefSeq	547560	547844	+	LLMG_RS02880;llmg_0553;	LLMG_RS02880	n	n	transcript_id gene577; gene_id gene577; gene_name LLMG_RS02880; Dbxref Genbank:WP_011834581.1; Name WP_011834581.1; gbkey CDS; inference COORDINATES: similar to AA sequence:RefSeq:NP_266741.1; product antibiotic biosynthesis monooxygenase; transl_table 11; gbkey Gene; gene_biotype protein_coding; locus_tag LLMG_RS02880; old_locus_tag llmg_0553; protein_id WP_011834581.1;
llmg_1814	gene1815	-1.22113	9.19195	-6.95858	9.92956e-05	0.000911705	1.35508	NC_009004.1	RefSeq	1793972	1795339	-	LLMG_RS09090;llmg_1814;	LLMG_RS09090	llm03030	DNA replication	transcript_id gene1815; gene_id gene1815; gene_name LLMG_RS09090; Dbxref Genbank:WP_011835585.1; Name WP_011835585.1; gbkey CDS; inference COORDINATES: similar to AA sequence:RefSeq:NP_266902.1; product replicative DNA helicase; transl_table 11; gbkey Gene; gene_biotype protein_coding; locus_tag LLMG_RS09090; old_locus_tag llmg_1814; protein_id WP_011835585.1;
llmg_0227	gene240	-1.01658	8.91552	-6.90315	0.000105165	0.000961289	1.22962	NC_009004.1	RefSeq	217228	218283	+	LLMG_RS01195;llmg_0227;	LLMG_RS01195	n	n	transcript_id gene240; gene_id gene240; gene_name LLMG_RS01195; Dbxref Genbank:WP_011834310.1; Name WP_011834310.1; gbkey CDS; inference COORDINATES: protein motif:HMM:PF09913.7; product DUF2142 domain-containing protein; transl_table 11; gbkey Gene; gene_biotype protein_coding; locus_tag LLMG_RS01195; old_locus_tag llmg_0227; protein_id WP_011834310.1;
llmg_2247	gene2253	-1.52425	9.59435	-6.89047	0.000106561	0.000970448	1.33435	NC_009004.1	RefSeq	2210138	2210863	-	LLMG_RS11265;llmg_2247;	LLMG_RS11265	n	n	transcript_id gene2253; gene_id gene2253; gene_name LLMG_RS11265; Dbxref Genbank:WP_011835934.1; Name WP_011835934.1; gbkey CDS; inference COORDINATES: similar to AA sequence:RefSeq:WP_011835934.1; product hypothetical protein; transl_table 11; gbkey Gene; gene_biotype protein_coding; locus_tag LLMG_RS11265; old_locus_tag llmg_2247; protein_id WP_011835934.1;
llmg_0476	gene487	-1.06123	7.55687	-6.88641	0.000107012	0.000970981	1.22536	NC_009004.1	RefSeq	468875	469747	-	LLMG_RS02425;llmg_0476;	LLMG_RS02425	n	n	transcript_id gene487; gene_id gene487; gene_name LLMG_RS02425; Dbxref Genbank:WP_011834517.1; Name WP_011834517.1; gbkey CDS; inference COORDINATES: similar to AA sequence:RefSeq:NP_266648.1; product DUF1003 domain-containing protein; transl_table 11; gbkey Gene; gene_biotype protein_coding; locus_tag LLMG_RS02425; old_locus_tag llmg_0476; protein_id WP_011834517.1;
llmg_0215	gene228	-1.19701	9.09969	-6.87678	0.000108091	0.00097717	1.21957	NC_009004.1	RefSeq	203650	205041	+	LLMG_RS01135;llmg_0215;	LLMG_RS01135	n	n	transcript_id gene228; gene_id gene228; gene_name LLMG_RS01135; Dbxref Genbank:WP_011834298.1; Name WP_011834298.1; gbkey CDS; inference COORDINATES: similar to AA sequence:RefSeq:WP_015425699.1; product DUF2142 domain-containing protein; transl_table 11; gbkey Gene; gene_biotype protein_coding; locus_tag LLMG_RS01135; old_locus_tag llmg_0215; protein_id WP_011834298.1;
llmg_1291	gene1312	1.48353	6.97072	6.86757	0.000109133	0.000982996	1.31863	NC_009004.1	RefSeq	1261572	1262312	-	LLMG_RS06545;llmg_1291;	LLMG_RS06545	llm00340	Histidine metabolism	transcript_id gene1312; gene_id gene1312; gene_name hisA; Dbxref Genbank:WP_011835168.1; Name WP_011835168.1; gbkey CDS; inference COORDINATES: similar to AA sequence:RefSeq:WP_011835168.1; product 1-(5-phosphoribosyl)-5-((5-phosphoribosylamino)methylideneamino)imidazole-4-carboxamide isomerase; transl_table 11; Name hisA; gbkey Gene; gene_biotype protein_coding; locus_tag LLMG_RS06545; old_locus…
llmg_0340	gene352	-1.05229	8.07188	-6.85357	0.00011074	0.000984908	1.14442	NC_009004.1	RefSeq	327015	327875	+	LLMG_RS01750;llmg_0340;	LLMG_RS01750	llm02010	ABC transporters	transcript_id gene352; gene_id gene352; gene_name LLMG_RS01750; Dbxref Genbank:WP_011834401.1; Name WP_011834401.1; gbkey CDS; inference COORDINATES: similar to AA sequence:RefSeq:NP_266477.1; product MetQ/NlpA family ABC transporter substrate-binding protein; transl_table 11; gbkey Gene; gene_biotype protein_coding; locus_tag LLMG_RS01750; old_locus_tag llmg_0340; protein_id WP_011834401.1;
llmg_0446	gene456	-1.72022	8.50535	-6.85508	0.000110565	0.000984908	1.20806	NC_009004.1	RefSeq	437518	438654	+	LLMG_RS02270;llmg_0446;	LLMG_RS02270	llm02010	ABC transporters	transcript_id gene456; gene_id gene456; gene_name LLMG_RS02270; Dbxref Genbank:WP_011834488.1; Name WP_011834488.1; gbkey CDS; inference COORDINATES: similar to AA sequence:RefSeq:NP_266577.1; product sn-glycerol-3-phosphate ABC transporter ATP-binding protein UgpC; transl_table 11; gbkey Gene; gene_biotype protein_coding; locus_tag LLMG_RS02270; old_locus_tag llmg_0446; protein_id WP_011834488.1;
llmg_0767	gene799	-1.07186	7.00573	-6.85986	0.000110015	0.000984908	1.25834	NC_009004.1	RefSeq	756890	757468	+	LLMG_RS03965;llmg_0767;	LLMG_RS03965	n	n	transcript_id gene799; gene_id gene799; gene_name LLMG_RS03965; Dbxref Genbank:WP_011834751.1; Name WP_011834751.1; gbkey CDS; inference COORDINATES: similar to AA sequence:RefSeq:WP_011834751.1; product hypothetical protein; transl_table 11; gbkey Gene; gene_biotype protein_coding; locus_tag LLMG_RS03965; old_locus_tag llmg_0767; protein_id WP_011834751.1;
llmg_1491	gene1507	-3.03488	8.7355	-6.85183	0.000110942	0.000984908	1.26274	NC_009004.1	RefSeq	1464261	1464545	-	LLMG_RS07520;llmg_1491;	LLMG_RS07520	llm03010	Ribosome	transcript_id gene1507; gene_id gene1507; gene_name LLMG_RS07520; Dbxref Genbank:WP_003130646.1; Name WP_003130646.1; gbkey CDS; inference COORDINATES: similar to AA sequence:RefSeq:NP_267237.1; product 50S ribosomal protein L27; transl_table 11; gbkey Gene; gene_biotype protein_coding; locus_tag LLMG_RS07520; old_locus_tag llmg_1491; protein_id WP_003130646.1;
llmg_0466	gene476	-1.22761	9.60152	-6.84297	0.000111974	0.000990512	1.24692	NC_009004.1	RefSeq	459608	460744	+	LLMG_RS02370;llmg_0466;	LLMG_RS02370	n	n	transcript_id gene476; gene_id gene476; gene_name LLMG_RS02370; Dbxref Genbank:WP_011834507.1; Name WP_011834507.1; gbkey CDS; inference COORDINATES: similar to AA sequence:RefSeq:WP_014573119.1; product aminotransferase class V-fold PLP-dependent enzyme; transl_table 11; gbkey Gene; gene_biotype protein_coding; locus_tag LLMG_RS02370; old_locus_tag llmg_0466; protein_id WP_011834507.1;
llmg_0384	gene396	-0.928959	8.20158	-6.8263	0.000113945	0.00100434	1.10851	NC_009004.1	RefSeq	375363	376244	+	LLMG_RS01970;llmg_0384;	LLMG_RS01970	n	n	transcript_id gene396; gene_id gene396; gene_name LLMG_RS01970; Dbxref Genbank:WP_011834437.1; Name WP_011834437.1; gbkey CDS; inference COORDINATES: similar to AA sequence:RefSeq:NP_266520.1; product RluA family pseudouridine synthase; transl_table 11; gbkey Gene; gene_biotype protein_coding; locus_tag LLMG_RS01970; old_locus_tag llmg_0384; protein_id WP_011834437.1;
llmg_1534	gene1547	-1.44144	10.0556	-6.81646	0.000115127	0.00101115	1.26833	NC_009004.1	RefSeq	1505890	1508364	-	LLMG_RS07720;llmg_1534;	LLMG_RS07720	n	n	transcript_id gene1547; gene_id gene1547; gene_name parC; Dbxref Genbank:WP_011835376.1; Name WP_011835376.1; gbkey CDS; inference COORDINATES: similar to AA sequence:RefSeq:NP_267140.1; product DNA topoisomerase IV subunit A; transl_table 11; Name parC; gbkey Gene; gene_biotype protein_coding; locus_tag LLMG_RS07720; old_locus_tag llmg_1534; protein_id WP_011835376.1;
llmg_1277	gene1298	1.5553	6.84998	6.80626	0.000116366	0.00101124	1.3177	NC_009004.1	RefSeq	1246815	1247837	-	LLMG_RS06475;llmg_1277;	LLMG_RS06475	llm00290, llm00770	Valine, leucine and isoleucine biosynthesis , Pantothenate and CoA biosynthesis	transcript_id gene1298; gene_id gene1298; gene_name LLMG_RS06475; Dbxref Genbank:WP_011835156.1; Name WP_011835156.1; gbkey CDS; inference COORDINATES: similar to AA sequence:RefSeq:NP_267382.1; product ketol-acid reductoisomerase; transl_table 11; gbkey Gene; gene_biotype protein_coding; locus_tag LLMG_RS06475; old_locus_tag llmg_1277; protein_id WP_011835156.1;
llmg_1452	gene1469	-1.03167	8.21128	-6.80811	0.000116139	0.00101124	1.0921	NC_009004.1	RefSeq	1422000	1423469	-	LLMG_RS07330;llmg_1452;	LLMG_RS07330	n	n	transcript_id gene1469; gene_id gene1469; gene_name LLMG_RS07330; Dbxref Genbank:WP_011835304.1; Name WP_011835304.1; gbkey CDS; inference COORDINATES: similar to AA sequence:RefSeq:WP_011835304.1; product amino acid permease; transl_table 11; gbkey Gene; gene_biotype protein_coding; locus_tag LLMG_RS07330; old_locus_tag llmg_1452; protein_id WP_011835304.1;
llmg_2150	gene2151	-1.2037	7.26244	-6.8079	0.000116165	0.00101124	1.18826	NC_009004.1	RefSeq	2111488	2111862	-	LLMG_RS10760;llmg_2150;	LLMG_RS10760	n	n	transcript_id gene2151; gene_id gene2151; gene_name LLMG_RS10760; Dbxref Genbank:WP_011835854.1; Name WP_011835854.1; gbkey CDS; inference COORDINATES: similar to AA sequence:RefSeq:NP_268053.1; product nuclear transport factor 2 family protein; transl_table 11; gbkey Gene; gene_biotype protein_coding; locus_tag LLMG_RS10760; old_locus_tag llmg_2150; protein_id WP_011835854.1;
llmg_0066	gene75	1.0234	9.01136	6.76848	0.000121084	0.00104855	1.11051	NC_009004.1	RefSeq	60873	62048	+	LLMG_RS00370;llmg_0066;	LLMG_RS00370	llm00300	Lysine biosynthesis	transcript_id gene75; gene_id gene75; gene_name LLMG_RS00370; Dbxref Genbank:WP_011834170.1; Name WP_011834170.1; Note catalyzes the transamination of the aromatic amino acid forming a ketoacid%3B first step in aromatic amino acid degradation in lactococci; gbkey CDS; inference COORDINATES: similar to AA sequence:RefSeq:NP_266213.1; product pyridoxal phosphate-dependent aminotransferase; transl_t…
llmg_2332	gene2338	-1.64963	10.1816	-6.7629	0.000121799	0.00105105	1.22446	NC_009004.1	RefSeq	2290608	2292059	-	LLMG_RS11690;llmg_2332;	LLMG_RS11690	llm00970	Aminoacyl-tRNA biosynthesis	transcript_id gene2338; gene_id gene2338; gene_name LLMG_RS11690; Dbxref Genbank:WP_011836000.1; Name WP_011836000.1; gbkey CDS; inference COORDINATES: similar to AA sequence:RefSeq:NP_268210.1; product glutamate--tRNA ligase; transl_table 11; gbkey Gene; gene_biotype protein_coding; locus_tag LLMG_RS11690; old_locus_tag llmg_2332; protein_id WP_011836000.1;
llmg_1186	gene1203	-1.9524	10.4093	-6.74252	0.000124448	0.00107016	1.23584	NC_009004.1	RefSeq	1158725	1158964	+	LLMG_RS06005;llmg_1186;	LLMG_RS06005	n	n	transcript_id gene1203; gene_id gene1203; gene_name LLMG_RS06005; Dbxref Genbank:WP_003130191.1; Name WP_003130191.1; gbkey CDS; inference COORDINATES: similar to AA sequence:RefSeq:NP_267439.1; product hypothetical protein; transl_table 11; gbkey Gene; gene_biotype protein_coding; locus_tag LLMG_RS06005; old_locus_tag llmg_1186; protein_id WP_003130191.1;
llmg_0185	gene197	-0.95453	7.83775	-6.73609	0.000125298	0.00107373	1.00856	NC_009004.1	RefSeq	173529	174581	+	LLMG_RS00980;llmg_0185;	LLMG_RS00980	n	n	transcript_id gene197; gene_id gene197; gene_name LLMG_RS00980; Dbxref Genbank:WP_011834273.1; Name WP_011834273.1; gbkey CDS; inference COORDINATES: similar to AA sequence:RefSeq:NP_266328.1; product GNAT family N-acetyltransferase; transl_table 11; gbkey Gene; gene_biotype protein_coding; locus_tag LLMG_RS00980; old_locus_tag llmg_0185; protein_id WP_011834273.1;
llmg_0078	gene86	-1.76072	5.96508	-6.72784	0.000126396	0.00107693	1.30058	NC_009004.1	RefSeq	73518	73844	-	LLMG_RS00425;llmg_0078;	LLMG_RS00425	n	n	transcript_id gene86; gene_id gene86; gene_name LLMG_RS00425; Dbxref Genbank:WP_011834181.1; Name WP_011834181.1; gbkey CDS; inference COORDINATES: similar to AA sequence:RefSeq:WP_011675122.1; product hypothetical protein; transl_table 11; gbkey Gene; gene_biotype protein_coding; locus_tag LLMG_RS00425; old_locus_tag llmg_0078; protein_id WP_011834181.1;
llmg_1789	gene1792	-2.2268	9.86203	-6.72674	0.000126543	0.00107693	1.17201	NC_009004.1	RefSeq	1768769	1769716	-	LLMG_RS08975;llmg_1789;	LLMG_RS08975	llm00051, llm00520	Fructose and mannose metabolism , Amino sugar and nucleotide sugar metabolism	transcript_id gene1792; gene_id gene1792; gene_name manA; Dbxref Genbank:WP_011835569.1; Name WP_011835569.1; gbkey CDS; inference COORDINATES: similar to AA sequence:RefSeq:NP_266925.1; product mannose-6-phosphate isomerase%2C class I; transl_table 11; Name manA; gbkey Gene; gene_biotype protein_coding; locus_tag LLMG_RS08975; old_locus_tag llmg_1789; protein_id WP_011835569.1;
llmg_0239	gene252	-1.41255	7.65311	-6.71914	0.000127567	0.00108185	1.05919	NC_009004.1	RefSeq	228093	228452	+	LLMG_RS01255;llmg_0239;	LLMG_RS01255	n	n	transcript_id gene252; gene_id gene252; gene_name rsfS; Dbxref Genbank:WP_011834321.1; Name WP_011834321.1; gbkey CDS; inference COORDINATES: similar to AA sequence:RefSeq:NP_266384.1; product ribosome silencing factor; transl_table 11; Name rsfS; gbkey Gene; gene_biotype protein_coding; locus_tag LLMG_RS01255; old_locus_tag llmg_0239; protein_id WP_011834321.1;
llmg_1296	gene1317	1.76846	7.24526	6.71595	0.000127999	0.00108185	1.13143	NC_009004.1	RefSeq	1265647	1266273	-	LLMG_RS06570;llmg_1296;	LLMG_RS06570	llm00340	Histidine metabolism	transcript_id gene1317; gene_id gene1317; gene_name LLMG_RS06570; Dbxref Genbank:WP_011835173.1; Name WP_011835173.1; gbkey CDS; inference COORDINATES: similar to AA sequence:RefSeq:WP_003131107.1; product ATP phosphoribosyltransferase; transl_table 11; gbkey Gene; gene_biotype protein_coding; locus_tag LLMG_RS06570; old_locus_tag llmg_1296; protein_id WP_011835173.1;
llmg_1576	gene1588	-1.37397	7.84053	-6.68547	0.00013221	0.00111363	0.966503	NC_009004.1	RefSeq	1552096	1553139	-	LLMG_RS07940;llmg_1576;	LLMG_RS07940	n	n	transcript_id gene1588; gene_id gene1588; gene_name LLMG_RS07940; Dbxref Genbank:WP_011835410.1; Name WP_011835410.1; gbkey CDS; inference COORDINATES: similar to AA sequence:RefSeq:NP_267108.1; product HrcA family transcriptional regulator; transl_table 11; gbkey Gene; gene_biotype protein_coding; locus_tag LLMG_RS07940; old_locus_tag llmg_1576; protein_id WP_011835410.1;
llmg_2147	gene2148	-1.25784	8.82583	-6.67518	0.000133665	0.00112206	0.985895	NC_009004.1	RefSeq	2109555	2110526	-	LLMG_RS10745;llmg_2147;	LLMG_RS10745	llm00670, llm00970	One carbon pool by folate , Aminoacyl-tRNA biosynthesis	transcript_id gene2148; gene_id gene2148; gene_name LLMG_RS10745; Dbxref Genbank:WP_011835851.1; Name WP_011835851.1; gbkey CDS; inference COORDINATES: similar to AA sequence:RefSeq:NP_268050.1; product methionyl-tRNA formyltransferase; transl_table 11; gbkey Gene; gene_biotype protein_coding; locus_tag LLMG_RS10745; old_locus_tag llmg_2147; protein_id WP_011835851.1;
llmg_0094	gene103	1.89094	4.39596	6.64867	0.000137498	0.00115032	1.29259	NC_009004.1	RefSeq	89996	90193	+	LLMG_RS00510;llmg_0094;	LLMG_RS00510	n	n	transcript_id gene103; gene_id gene103; gene_name LLMG_RS00510; Dbxref Genbank:WP_011834196.1; Name WP_011834196.1; gbkey CDS; inference COORDINATES: similar to AA sequence:RefSeq:NP_835288.1; product hypothetical protein; transl_table 11; gbkey Gene; gene_biotype protein_coding; locus_tag LLMG_RS00510; old_locus_tag llmg_0094; protein_id WP_011834196.1;
llmg_0004	gene3	-1.26865	10.2562	-6.62633	0.000140822	0.00117415	1.08054	NC_009004.1	RefSeq	6062	9673	+	LLMG_RS00020;llmg_0004;	LLMG_RS00020	n	n	transcript_id gene3; gene_id gene3; gene_name addA; Dbxref Genbank:WP_011834123.1; Name WP_011834123.1; gbkey CDS; inference COORDINATES: similar to AA sequence:RefSeq:NP_266160.1; product ATP-dependent helicase/nuclease subunit A; transl_table 11; Name addA; gbkey Gene; gene_biotype protein_coding; locus_tag LLMG_RS00020; old_locus_tag llmg_0004; protein_id WP_011834123.1;
llmg_1032	gene1053	-1.09344	7.74607	-6.62152	0.000141548	0.00117623	0.913027	NC_009004.1	RefSeq	996817	997824	+	LLMG_RS05245;llmg_1032;	LLMG_RS05245	llm00400	Phenylalanine, tyrosine and tryptophan biosynthesis	transcript_id gene1053; gene_id gene1053; gene_name trpD; Dbxref Genbank:WP_011834959.1; Name WP_011834959.1; gbkey CDS; inference COORDINATES: similar to AA sequence:RefSeq:NP_267624.2; product anthranilate phosphoribosyltransferase; transl_table 11; Name trpD; gbkey Gene; gene_biotype protein_coding; locus_tag LLMG_RS05245; old_locus_tag llmg_1032; protein_id WP_011834959.1;
llmg_0354	gene367	1.32929	6.99745	6.61417	0.000142667	0.00118155	0.996411	NC_009004.1	RefSeq	340804	341196	+	LLMG_RS01825;llmg_0354;	LLMG_RS01825	n	n	transcript_id gene367; gene_id gene367; gene_name LLMG_RS01825; Dbxref Genbank:WP_011675393.1; Name WP_011675393.1; gbkey CDS; inference COORDINATES: similar to AA sequence:RefSeq:NP_266491.1; product VOC family protein; transl_table 11; gbkey Gene; gene_biotype protein_coding; locus_tag LLMG_RS01825; old_locus_tag llmg_0354; protein_id WP_011675393.1;
LLMG_RS06205	gene1245	1.28209	6.26459	6.60489	0.000144095	0.00118939	1.14132	NC_009004.1	RefSeq	1199843	1200364	-	LLMG_RS06205;	LLMG_RS06205	n	n	transcript_id gene1245; gene_id gene1245; gene_name LLMG_RS06205; Dbxref Genbank:WP_041931188.1; Name WP_041931188.1; gbkey CDS; inference COORDINATES: ab initio prediction:GeneMarkS+; product hypothetical protein; transl_table 11; gbkey Gene; gene_biotype protein_coding; locus_tag LLMG_RS06205; protein_id WP_041931188.1;
llmg_2024	gene2023	1.60442	7.33424	6.59659	0.000145385	0.00119603	0.993075	NC_009004.1	RefSeq	2009303	2011105	-	LLMG_RS10125;llmg_2024;	LLMG_RS10125	llm02024	Quorum sensing	transcript_id gene2023; gene_id gene2023; gene_name LLMG_RS10125; Dbxref Genbank:WP_011835747.1; Name WP_011835747.1; gbkey CDS; inference COORDINATES: similar to AA sequence:RefSeq:NP_267994.1; product oligopeptide ABC transporter substrate-binding protein; transl_table 11; gbkey Gene; gene_biotype protein_coding; locus_tag LLMG_RS10125; old_locus_tag llmg_2024; protein_id WP_011835747.1;
llmg_0224	gene237	-1.81982	9.42453	-6.59215	0.000146079	0.00119775	0.926005	NC_009004.1	RefSeq	212853	213983	+	LLMG_RS01180;llmg_0224;	LLMG_RS01180	llm00052, llm00520	Galactose metabolism , Amino sugar and nucleotide sugar metabolism	transcript_id gene237; gene_id gene237; gene_name glf; Dbxref Genbank:WP_011834307.1; Name WP_011834307.1; gbkey CDS; inference COORDINATES: similar to AA sequence:RefSeq:NP_816133.1; product UDP-galactopyranose mutase; transl_table 11; Name glf; gbkey Gene; gene_biotype protein_coding; locus_tag LLMG_RS01180; old_locus_tag llmg_0224; protein_id WP_011834307.1;
llmg_0228	gene241	-1.20987	7.33059	-6.58412	0.000147346	0.00120414	0.94439	NC_009004.1	RefSeq	218280	218654	+	LLMG_RS01200;llmg_0228;	LLMG_RS01200	n	n	transcript_id gene241; gene_id gene241; gene_name LLMG_RS01200; Dbxref Genbank:WP_011834311.1; Name WP_011834311.1; gbkey CDS; inference COORDINATES: ab initio prediction:GeneMarkS+; product hypothetical protein; transl_table 11; gbkey Gene; gene_biotype protein_coding; locus_tag LLMG_RS01200; old_locus_tag llmg_0228; protein_id WP_011834311.1;
llmg_1792	gene1794	-1.23715	10.3698	-6.57855	0.000148232	0.00120738	1.01204	NC_009004.1	RefSeq	1770497	1773349	-	LLMG_RS08985;llmg_1792;	LLMG_RS08985	n	n	transcript_id gene1794; gene_id gene1794; gene_name LLMG_RS08985; Dbxref Genbank:WP_011835571.1; Name WP_011835571.1; gbkey CDS; inference COORDINATES: similar to AA sequence:RefSeq:WP_014572915.1; product translation initiation factor IF-2; transl_table 11; gbkey Gene; gene_biotype protein_coding; locus_tag LLMG_RS08985; old_locus_tag llmg_1792; protein_id WP_011835571.1;
llmg_0559	gene583	-0.976335	8.30665	-6.56857	0.000149833	0.00121641	0.818859	NC_009004.1	RefSeq	552428	553183	+	LLMG_RS02910;llmg_0559;	LLMG_RS02910	n	n	transcript_id gene583; gene_id gene583; gene_name LLMG_RS02910; Dbxref Genbank:WP_011834585.1; Name WP_011834585.1; gbkey CDS; inference COORDINATES: similar to AA sequence:RefSeq:WP_011834585.1; product oxygen-insensitive NADPH nitroreductase; transl_table 11; gbkey Gene; gene_biotype protein_coding; locus_tag LLMG_RS02910; old_locus_tag llmg_0559; protein_id WP_011834585.1;
llmg_0557	gene581	-0.867905	7.84666	-6.56172	0.000150944	0.00122141	0.815101	NC_009004.1	RefSeq	550758	551831	+	LLMG_RS02900;llmg_0557;	LLMG_RS02900	n	n	transcript_id gene581; gene_id gene581; gene_name LLMG_RS02900; Dbxref Genbank:WP_011834583.1; Name WP_011834583.1; gbkey CDS; inference COORDINATES: similar to AA sequence:RefSeq:NP_266751.1; product peptide chain release factor 1; transl_table 11; gbkey Gene; gene_biotype protein_coding; locus_tag LLMG_RS02900; old_locus_tag llmg_0557; protein_id WP_011834583.1;
llmg_1282	gene1303	2.17569	5.56854	6.55356	0.000152278	0.00122417	1.13858	NC_009004.1	RefSeq	1252718	1253293	-	LLMG_RS06500;llmg_1282;	LLMG_RS06500	llm00290, llm00660	Valine, leucine and isoleucine biosynthesis , C5-Branched dibasic acid metabolism	transcript_id gene1303; gene_id gene1303; gene_name leuD; Dbxref Genbank:WP_011835161.1; Name WP_011835161.1; gbkey CDS; inference COORDINATES: similar to AA sequence:RefSeq:NP_267377.1; product 3-isopropylmalate dehydratase small subunit; transl_table 11; Name leuD; gbkey Gene; gene_biotype protein_coding; locus_tag LLMG_RS06500; old_locus_tag llmg_1282; protein_id WP_011835161.1;
llmg_1791	gene1793	-1.37592	7.46446	-6.55612	0.000151857	0.00122417	0.91416	NC_009004.1	RefSeq	1769892	1770251	-	LLMG_RS08980;llmg_1791;	LLMG_RS08980	n	n	transcript_id gene1793; gene_id gene1793; gene_name LLMG_RS08980; Dbxref Genbank:WP_011675738.1; Name WP_011675738.1; gbkey CDS; inference COORDINATES: similar to AA sequence:RefSeq:NP_266924.1; product ribosome-binding factor A; transl_table 11; gbkey Gene; gene_biotype protein_coding; locus_tag LLMG_RS08980; old_locus_tag llmg_1791; protein_id WP_011675738.1;
llmg_0298	gene313	-1.28502	7.61477	-6.53688	0.000155045	0.00123835	0.826098	NC_009004.1	RefSeq	288431	288874	+	LLMG_RS01560;llmg_0298;	LLMG_RS01560	n	n	transcript_id gene313; gene_id gene313; gene_name LLMG_RS01560; Dbxref Genbank:WP_011834367.1; Name WP_011834367.1; gbkey CDS; inference COORDINATES: similar to AA sequence:RefSeq:WP_011834367.1; product SprT family protein; transl_table 11; gbkey Gene; gene_biotype protein_coding; locus_tag LLMG_RS01560; old_locus_tag llmg_0298; protein_id WP_011834367.1;
llmg_1109	gene1129	-1.29207	8.69672	-6.53895	0.000154698	0.00123835	0.817189	NC_009004.1	RefSeq	1069648	1070364	-	LLMG_RS05630;llmg_1109;	LLMG_RS05630	n	n	transcript_id gene1129; gene_id gene1129; gene_name LLMG_RS05630; Dbxref Genbank:WP_011835017.1; Name WP_011835017.1; gbkey CDS; inference COORDINATES: similar to AA sequence:RefSeq:NP_267499.1; product ribosomal RNA small subunit methyltransferase G; transl_table 11; gbkey Gene; gene_biotype protein_coding; locus_tag LLMG_RS05630; old_locus_tag llmg_1109; protein_id WP_011835017.1;
llmg_2424	gene2430	-1.03436	8.68259	-6.53159	0.000155934	0.00124144	0.821305	NC_009004.1	RefSeq	2366797	2367549	-	LLMG_RS12155;llmg_2424;	LLMG_RS12155	n	n	transcript_id gene2430; gene_id gene2430; gene_name LLMG_RS12155; Dbxref Genbank:WP_011836062.1; Name WP_011836062.1; gbkey CDS; inference COORDINATES: similar to AA sequence:RefSeq:NP_268298.1; product tRNA1(Val) (adenine(37)-N6)-methyltransferase; transl_table 11; gbkey Gene; gene_biotype protein_coding; locus_tag LLMG_RS12155; old_locus_tag llmg_2424; protein_id WP_011836062.1;
llmg_0998	gene1019	1.63126	6.38823	6.52763	0.000156604	0.00124276	1.08349	NC_009004.1	RefSeq	964919	965611	+	LLMG_RS05080;llmg_0998;	LLMG_RS05080	n	n	transcript_id gene1019; gene_id gene1019; gene_name LLMG_RS05080; Dbxref Genbank:WP_011834930.1; Name WP_011834930.1; gbkey CDS; inference COORDINATES: similar to AA sequence:RefSeq:WP_015082597.1; product haloacid dehalogenase; transl_table 11; gbkey Gene; gene_biotype protein_coding; locus_tag LLMG_RS05080; old_locus_tag llmg_0998; protein_id WP_011834930.1;
llmg_2422	gene2428	-1.6445	8.23696	-6.51804	0.000158238	0.0012517	0.788306	NC_009004.1	RefSeq	2365368	2365592	+	LLMG_RS12145;llmg_2422;	LLMG_RS12145	n	n	transcript_id gene2428; gene_id gene2428; gene_name LLMG_RS12145; Dbxref Genbank:WP_003130579.1; Name WP_003130579.1; gbkey CDS; inference COORDINATES: similar to AA sequence:RefSeq:NP_268296.1; product DUF1797 domain-containing protein; transl_table 11; gbkey Gene; gene_biotype protein_coding; locus_tag LLMG_RS12145; old_locus_tag llmg_2422; protein_id WP_003130579.1;
llmg_1209	gene1227	1.45499	6.29747	6.49712	0.000161868	0.00127633	0.981562	NC_009004.1	RefSeq	1177158	1177541	+	LLMG_RS06115;llmg_1209;	LLMG_RS06115	n	n	transcript_id gene1227; gene_id gene1227; gene_name LLMG_RS06115; Dbxref Genbank:WP_011835102.1; Name WP_011835102.1; gbkey CDS; inference COORDINATES: similar to AA sequence:RefSeq:WP_011835102.1; product MarR family transcriptional regulator; transl_table 11; gbkey Gene; gene_biotype protein_coding; locus_tag LLMG_RS06115; old_locus_tag llmg_1209; protein_id WP_011835102.1;
llmg_2161	gene2159	-1.29764	9.5981	-6.49409	0.000162402	0.00127646	0.873053	NC_009004.1	RefSeq	2121533	2122726	-	LLMG_RS10800;llmg_2161;	LLMG_RS10800	n	n	transcript_id gene2159; gene_id gene2159; gene_name LLMG_RS10800; Dbxref Genbank:WP_011835865.1; Name WP_011835865.1; gbkey CDS; inference COORDINATES: similar to AA sequence:RefSeq:WP_004258378.1; product class I SAM-dependent methyltransferase; transl_table 11; gbkey Gene; gene_biotype protein_coding; locus_tag LLMG_RS10800; old_locus_tag llmg_2161; protein_id WP_011835865.1;
llmg_0539	gene566	-1.33295	9.49963	-6.45956	0.000168621	0.00132113	0.795945	NC_009004.1	RefSeq	537078	537830	+	LLMG_RS02820;llmg_0539;	LLMG_RS02820	llm00061, llm00780	Fatty acid biosynthesis , Biotin metabolism	transcript_id gene566; gene_id gene566; gene_name LLMG_RS02820; Dbxref Genbank:WP_011834571.1; Name WP_011834571.1; gbkey CDS; inference COORDINATES: similar to AA sequence:RefSeq:NP_266722.1; product enoyl-[acyl-carrier-protein] reductase FabI; transl_table 11; gbkey Gene; gene_biotype protein_coding; locus_tag LLMG_RS02820; old_locus_tag llmg_0539; protein_id WP_011834571.1;
llmg_0127	gene135	-1.93831	11.7245	-6.43285	0.000173608	0.00135568	0.970639	NC_009004.1	RefSeq	120704	122431	+	LLMG_RS00675;llmg_0127;	LLMG_RS00675	llm02060	Phosphotransferase system (PTS)	transcript_id gene135; gene_id gene135; gene_name ptsP; Dbxref Genbank:WP_011834225.1; Name WP_011834225.1; gbkey CDS; inference COORDINATES: similar to AA sequence:RefSeq:NP_266274.1; product phosphoenolpyruvate--protein phosphotransferase; transl_table 11; Name ptsP; gbkey Gene; gene_biotype protein_coding; locus_tag LLMG_RS00675; old_locus_tag llmg_0127; protein_id WP_011834225.1;
llmg_2483	gene2496	-1.64913	8.24572	-6.43011	0.000174129	0.00135568	0.685372	NC_009004.1	RefSeq	2439144	2439344	+	LLMG_RS12475;llmg_2483;	LLMG_RS12475	n	n	transcript_id gene2496; gene_id gene2496; gene_name LLMG_RS12475; Dbxref Genbank:WP_011836112.1; Name WP_011836112.1; gbkey CDS; inference COORDINATES: similar to AA sequence:RefSeq:NP_268356.1; product hypothetical protein; transl_table 11; gbkey Gene; gene_biotype protein_coding; locus_tag LLMG_RS12475; old_locus_tag llmg_2483; protein_id WP_011836112.1;
LLMG_RS12985	gene288	-1.20102	9.07438	-6.41854	0.000176348	0.00136864	0.738129	NC_009004.1	RefSeq	262484	262948	+	LLMG_RS12985;pseudotrue;	LLMG_RS12985	n	n	transcript_id gene288; gene_id gene288; gene_name LLMG_RS12985; Note internal stop; gbkey CDS; inference COORDINATES: similar to AA sequence:RefSeq:NP_266423.1; product transcription activator; pseudo true; transl_table 11; gbkey Gene; gene_biotype pseudogene; locus_tag LLMG_RS12985; pseudo true;
llmg_1767	gene1771	0.952458	7.49678	6.41187	0.000177642	0.00137436	0.712952	NC_009004.1	RefSeq	1751788	1752530	+	LLMG_RS08875;llmg_1767;pseudotrue;	LLMG_RS08875	n	n	transcript_id gene1771; gene_id gene1771; gene_name LLMG_RS08875; Note frameshifted; gbkey CDS; inference COORDINATES: similar to AA sequence:RefSeq:NP_266945.1; product DeoR/GlpR transcriptional regulator; pseudo true; transl_table 11; gbkey Gene; gene_biotype pseudogene; locus_tag LLMG_RS08875; old_locus_tag llmg_1767; pseudo true;
llmg_1982	gene1985	-1.31878	11.4107	-6.40646	0.000178698	0.00137821	0.926063	NC_009004.1	RefSeq	1966555	1970145	-	LLMG_RS09935;llmg_1982;	LLMG_RS09935	llm03020	RNA polymerase	transcript_id gene1985; gene_id gene1985; gene_name rpoB; Dbxref Genbank:WP_011835718.1; Name WP_011835718.1; gbkey CDS; inference COORDINATES: similar to AA sequence:RefSeq:NP_267957.1; product DNA-directed RNA polymerase subunit beta; transl_table 11; Name rpoB; gbkey Gene; gene_biotype protein_coding; locus_tag LLMG_RS09935; old_locus_tag llmg_1982; protein_id WP_011835718.1;
LLMG_RS12090	gene2417	-0.839869	8.31218	-6.4036	0.000179259	0.00137822	0.614932	NC_009004.1	RefSeq	2352975	2354307	-	LLMG_RS12090;pseudotrue;	LLMG_RS12090	n	n	transcript_id gene2417; gene_id gene2417; gene_name LLMG_RS12090; Note frameshifted; gbkey CDS; inference COORDINATES: similar to AA sequence:RefSeq:NP_268283.1; product NAD(P)/FAD-dependent oxidoreductase; pseudo true; transl_table 11; gbkey Gene; gene_biotype pseudogene; locus_tag LLMG_RS12090; pseudo true;
llmg_1225	gene1242	1.28143	7.80482	6.36672	0.000186674	0.00143078	0.682656	NC_009004.1	RefSeq	1195217	1197490	+	LLMG_RS06190;llmg_1225;	LLMG_RS06190	llm00270, llm00450	Cysteine and methionine metabolism , Selenocompound metabolism	transcript_id gene1242; gene_id gene1242; gene_name LLMG_RS06190; Dbxref Genbank:WP_011835114.1; Name WP_011835114.1; gbkey CDS; inference COORDINATES: similar to AA sequence:RefSeq:NP_267411.2; product 5-methyltetrahydropteroyltriglutamate--homocysteine methyltransferase; transl_table 11; gbkey Gene; gene_biotype protein_coding; locus_tag LLMG_RS06190; old_locus_tag llmg_1225; protein_id WP_0118…
llmg_1449	gene1466	0.906651	8.33502	6.3235	0.000195795	0.00149244	0.577659	NC_009004.1	RefSeq	1417226	1417978	-	LLMG_RS07315;llmg_1449;	LLMG_RS07315	n	n	transcript_id gene1466; gene_id gene1466; gene_name LLMG_RS07315; Dbxref Genbank:WP_011835301.1; Name WP_011835301.1; gbkey CDS; inference COORDINATES: similar to AA sequence:RefSeq:WP_003135727.1; product sortase; transl_table 11; gbkey Gene; gene_biotype protein_coding; locus_tag LLMG_RS07315; old_locus_tag llmg_1449; protein_id WP_011835301.1;
llmg_1684	gene1693	1.03317	7.50327	6.32289	0.000195928	0.00149244	0.620415	NC_009004.1	RefSeq	1658888	1659454	-	LLMG_RS08470;llmg_1684;	LLMG_RS08470	n	n	transcript_id gene1693; gene_id gene1693; gene_name LLMG_RS08470; Dbxref Genbank:WP_011835492.1; Name WP_011835492.1; gbkey CDS; inference COORDINATES: similar to AA sequence:RefSeq:NP_267018.1; product DUF1211 domain-containing protein; transl_table 11; gbkey Gene; gene_biotype protein_coding; locus_tag LLMG_RS08470; old_locus_tag llmg_1684; protein_id WP_011835492.1;
llmg_1188	gene1205	-0.911905	8.67943	-6.31178	0.000198352	0.00150625	0.5381	NC_009004.1	RefSeq	1159956	1160561	+	LLMG_RS06015;llmg_1188;	LLMG_RS06015	llm00230	Purine metabolism	transcript_id gene1205; gene_id gene1205; gene_name LLMG_RS06015; Dbxref Genbank:WP_011835088.1; Name WP_011835088.1; gbkey CDS; inference COORDINATES: similar to AA sequence:RefSeq:WP_010905866.1; product nucleoside-triphosphate diphosphatase; transl_table 11; gbkey Gene; gene_biotype protein_coding; locus_tag LLMG_RS06015; old_locus_tag llmg_1188; protein_id WP_011835088.1;
llmg_1952	gene1952	-1.30576	6.72166	-6.29613	0.000201825	0.00152792	0.688009	NC_009004.1	RefSeq	1933485	1933700	-	LLMG_RS09765;llmg_1952;	LLMG_RS09765	llm00190	Oxidative phosphorylation	transcript_id gene1952; gene_id gene1952; gene_name LLMG_RS09765; Dbxref Genbank:WP_004255250.1; Name WP_004255250.1; Note produces ATP from ADP in the presence of a proton gradient across the membrane%3B subunit C is part of the membrane proton channel F0; gbkey CDS; inference COORDINATES: similar to AA sequence:RefSeq:NP_267926.1; product F0F1 ATP synthase subunit C; transl_table 11; gbkey Gene…
llmg_0574	gene598	-1.49419	8.67811	-6.288	0.000203655	0.00153706	0.519567	NC_009004.1	RefSeq	563889	564332	-	LLMG_RS02985;llmg_0574;	LLMG_RS02985	n	n	transcript_id gene598; gene_id gene598; gene_name LLMG_RS02985; Dbxref Genbank:WP_011834599.1; Name WP_011834599.1; gbkey CDS; inference COORDINATES: similar to AA sequence:RefSeq:NP_266764.2; product flavodoxin; transl_table 11; gbkey Gene; gene_biotype protein_coding; locus_tag LLMG_RS02985; old_locus_tag llmg_0574; protein_id WP_011834599.1;
llmg_1895	gene1894	-1.82985	7.33583	-6.28115	0.000205211	0.00154408	0.586138	NC_009004.1	RefSeq	1873877	1874530	-	LLMG_RS09485;llmg_1895;	LLMG_RS09485	n	n	transcript_id gene1894; gene_id gene1894; gene_name phoU; Dbxref Genbank:WP_003130887.1; Name WP_003130887.1; gbkey CDS; inference COORDINATES: similar to AA sequence:RefSeq:NP_267871.1; product phosphate transport system regulatory protein PhoU; transl_table 11; Name phoU; gbkey Gene; gene_biotype protein_coding; locus_tag LLMG_RS09485; old_locus_tag llmg_1895; protein_id WP_003130887.1;
llmg_1913	gene1912	1.13577	8.14079	6.27732	0.000206086	0.00154596	0.563756	NC_009004.1	RefSeq	1892919	1894340	-	LLMG_RS09575;llmg_1913;	LLMG_RS09575	n	n	transcript_id gene1912; gene_id gene1912; gene_name LLMG_RS09575; Dbxref Genbank:WP_011676727.1; Name WP_011676727.1; gbkey CDS; inference COORDINATES: similar to AA sequence:RefSeq:NP_267887.1; product NCS2 family permease; transl_table 11; gbkey Gene; gene_biotype protein_coding; locus_tag LLMG_RS09575; old_locus_tag llmg_1913; protein_id WP_011676727.1;
llmg_0650	gene677	1.17752	8.82728	6.26466	0.000209011	0.00156315	0.513939	NC_009004.1	RefSeq	645202	646551	-	LLMG_RS03390;llmg_0650;	LLMG_RS03390	n	n	transcript_id gene677; gene_id gene677; gene_name brnQ; Dbxref Genbank:WP_011834657.1; Name WP_011834657.1; gbkey CDS; inference COORDINATES: similar to AA sequence:RefSeq:WP_011675644.1; product branched-chain amino acid transport system II carrier protein; transl_table 11; Name brnQ; gbkey Gene; gene_biotype protein_coding; locus_tag LLMG_RS03390; old_locus_tag llmg_0650; protein_id WP_01183465…
llmg_0722	gene753	-0.956927	8.11639	-6.24424	0.000213822	0.0015943	0.431122	NC_009004.1	RefSeq	706170	707441	-	LLMG_RS03735;llmg_0722;	LLMG_RS03735	llm00970	Aminoacyl-tRNA biosynthesis	transcript_id gene753; gene_id gene753; gene_name LLMG_RS03735; Dbxref Genbank:WP_011834713.1; Name WP_011834713.1; gbkey CDS; inference COORDINATES: similar to AA sequence:RefSeq:NP_267868.1; product serine--tRNA ligase; transl_table 11; gbkey Gene; gene_biotype protein_coding; locus_tag LLMG_RS03735; old_locus_tag llmg_0722; protein_id WP_011834713.1;
llmg_0868	gene894	-1.44644	9.80841	-6.23538	0.000215949	0.00160531	0.58063	NC_009004.1	RefSeq	837369	839345	+	LLMG_RS04440;llmg_0868;	LLMG_RS04440	llm00030	Pentose phosphate pathway	transcript_id gene894; gene_id gene894; gene_name tkt; Dbxref Genbank:WP_011834830.1; Name WP_011834830.1; gbkey CDS; inference COORDINATES: similar to AA sequence:RefSeq:NP_267781.1; product transketolase; transl_table 11; Name tkt; gbkey Gene; gene_biotype protein_coding; locus_tag LLMG_RS04440; old_locus_tag llmg_0868; protein_id WP_011834830.1;
llmg_1517	gene1530	-1.15257	8.08759	-6.2141	0.00022115	0.00163904	0.40639	NC_009004.1	RefSeq	1491159	1491815	-	LLMG_RS07635;llmg_1517;	LLMG_RS07635	n	n	transcript_id gene1530; gene_id gene1530; gene_name LLMG_RS07635; Dbxref Genbank:WP_011835359.1; Name WP_011835359.1; gbkey CDS; inference COORDINATES: similar to AA sequence:RefSeq:NP_267161.1; product phosphatase PAP2 family protein; transl_table 11; gbkey Gene; gene_biotype protein_coding; locus_tag LLMG_RS07635; old_locus_tag llmg_1517; protein_id WP_011835359.1;
llmg_0226	gene239	-1.06782	10.1585	-6.2055	0.000223291	0.00164945	0.563669	NC_009004.1	RefSeq	215427	217226	+	LLMG_RS01190;llmg_0226;	LLMG_RS01190	n	n	transcript_id gene239; gene_id gene239; gene_name LLMG_RS01190; Dbxref Genbank:WP_011834309.1; Name WP_011834309.1; gbkey CDS; inference COORDINATES: similar to AA sequence:RefSeq:WP_011834309.1; product hypothetical protein; transl_table 11; gbkey Gene; gene_biotype protein_coding; locus_tag LLMG_RS01190; old_locus_tag llmg_0226; protein_id WP_011834309.1;
llmg_1350	gene1370	-1.13105	8.80864	-6.2031	0.000223893	0.00164945	0.420345	NC_009004.1	RefSeq	1323752	1324327	-	LLMG_RS06840;llmg_1350;	LLMG_RS06840	n	n	transcript_id gene1370; gene_id gene1370; gene_name LLMG_RS06840; Dbxref Genbank:WP_011835221.1; Name WP_011835221.1; gbkey CDS; inference COORDINATES: similar to AA sequence:RefSeq:WP_011835221.1; product TerD family protein; transl_table 11; gbkey Gene; gene_biotype protein_coding; locus_tag LLMG_RS06840; old_locus_tag llmg_1350; protein_id WP_011835221.1;
llmg_1516	gene1529	-1.2643	9.71166	-6.19083	0.000226996	0.00166734	0.528284	NC_009004.1	RefSeq	1489160	1490977	-	LLMG_RS07630;llmg_1516;	LLMG_RS07630	llm00250, llm00520	Alanine, aspartate and glutamate metabolism , Amino sugar and nucleotide sugar metabolism	transcript_id gene1529; gene_id gene1529; gene_name glmS; Dbxref Genbank:WP_011835358.1; Name WP_011835358.1; gbkey CDS; inference COORDINATES: similar to AA sequence:RefSeq:NP_267162.1; product glutamine--fructose-6-phosphate transaminase (isomerizing); transl_table 11; Name glmS; gbkey Gene; gene_biotype protein_coding; locus_tag LLMG_RS07630; old_locus_tag llmg_1516; protein_id WP_011835358.1;
llmg_0362	gene375	1.67106	7.2058	6.17295	0.000231604	0.00169614	0.502557	NC_009004.1	RefSeq	350418	352070	+	LLMG_RS01865;llmg_0362;	LLMG_RS01865	llm02010, llm02024	ABC transporters , Quorum sensing	transcript_id gene375; gene_id gene375; gene_name LLMG_RS01865; Dbxref Genbank:WP_011834420.1; Name WP_011834420.1; gbkey CDS; inference COORDINATES: similar to AA sequence:RefSeq:NP_266499.1; product peptide ABC transporter substrate-binding protein; transl_table 11; gbkey Gene; gene_biotype protein_coding; locus_tag LLMG_RS01865; old_locus_tag llmg_0362; protein_id WP_011834420.1;
llmg_1734	gene1738	-1.6702	10.426	-6.14971	0.000237747	0.00173598	0.516197	NC_009004.1	RefSeq	1711705	1713708	-	LLMG_RS08715;llmg_1734;	LLMG_RS08715	llm00190	Oxidative phosphorylation	transcript_id gene1738; gene_id gene1738; gene_name LLMG_RS08715; Dbxref Genbank:WP_011835524.1; Name WP_011835524.1; gbkey CDS; inference COORDINATES: similar to AA sequence:RefSeq:NP_266985.1; product NAD(P)/FAD-dependent oxidoreductase; transl_table 11; gbkey Gene; gene_biotype protein_coding; locus_tag LLMG_RS08715; old_locus_tag llmg_1734; protein_id WP_011835524.1;
llmg_0325	gene338	-1.28367	9.49829	-6.13788	0.000240943	0.00175412	0.417329	NC_009004.1	RefSeq	312835	314829	+	LLMG_RS01680;llmg_0325;	LLMG_RS01680	llm02010	ABC transporters	transcript_id gene338; gene_id gene338; gene_name LLMG_RS01680; Dbxref Genbank:WP_011834388.1; Name WP_011834388.1; gbkey CDS; inference COORDINATES: similar to AA sequence:RefSeq:NP_266467.1; product ABC transporter ATP-binding protein; transl_table 11; gbkey Gene; gene_biotype protein_coding; locus_tag LLMG_RS01680; old_locus_tag llmg_0325; protein_id WP_011834388.1;
llmg_1644	gene1654	-1.35061	8.33692	-6.13354	0.000242126	0.00175755	0.310716	NC_009004.1	RefSeq	1622956	1623561	-	LLMG_RS08275;llmg_1644;	LLMG_RS08275	n	n	transcript_id gene1654; gene_id gene1654; gene_name LLMG_RS08275; Dbxref Genbank:WP_011675860.1; Name WP_011675860.1; gbkey CDS; inference COORDINATES: similar to AA sequence:RefSeq:NP_267051.1; product TVP38/TMEM64 family protein; transl_table 11; gbkey Gene; gene_biotype protein_coding; locus_tag LLMG_RS08275; old_locus_tag llmg_1644; protein_id WP_011675860.1;
llmg_2149	gene2150	-1.06359	7.21837	-6.12344	0.000244907	0.00177252	0.364002	NC_009004.1	RefSeq	2110953	2111474	-	LLMG_RS10755;llmg_2149;	LLMG_RS10755	n	n	transcript_id gene2150; gene_id gene2150; gene_name LLMG_RS10755; Dbxref Genbank:WP_011835853.1; Name WP_011835853.1; gbkey CDS; inference COORDINATES: similar to AA sequence:RefSeq:NP_268052.1; product NUDIX domain-containing protein; transl_table 11; gbkey Gene; gene_biotype protein_coding; locus_tag LLMG_RS10755; old_locus_tag llmg_2149; protein_id WP_011835853.1;
llmg_2017	gene2017	-1.67438	9.57912	-6.10532	0.000249983	0.00180397	0.371927	NC_009004.1	RefSeq	2002619	2003962	-	LLMG_RS10095;llmg_2017;	LLMG_RS10095	llm00970	Aminoacyl-tRNA biosynthesis	transcript_id gene2017; gene_id gene2017; gene_name LLMG_RS10095; Dbxref Genbank:WP_011835743.1; Name WP_011835743.1; gbkey CDS; inference COORDINATES: similar to AA sequence:RefSeq:NP_267985.1; product asparagine--tRNA ligase; transl_table 11; gbkey Gene; gene_biotype protein_coding; locus_tag LLMG_RS10095; old_locus_tag llmg_2017; protein_id WP_011835743.1;
llmg_1553	gene1564	0.869878	8.07086	6.08586	0.000255563	0.00183886	0.275416	NC_009004.1	RefSeq	1525342	1526220	-	LLMG_RS07805;llmg_1553;	LLMG_RS07805	n	n	transcript_id gene1564; gene_id gene1564; gene_name LLMG_RS07805; Dbxref Genbank:WP_011835392.1; Name WP_011835392.1; gbkey CDS; inference COORDINATES: similar to AA sequence:RefSeq:NP_267121.1; product ABC transporter ATP-binding protein; transl_table 11; gbkey Gene; gene_biotype protein_coding; locus_tag LLMG_RS07805; old_locus_tag llmg_1553; protein_id WP_011835392.1;
llmg_1110	gene1130	-0.907097	8.09444	-6.07797	0.000257866	0.00185004	0.222446	NC_009004.1	RefSeq	1070361	1071320	-	LLMG_RS05635;llmg_1110;	LLMG_RS05635	llm00900	Terpenoid backbone biosynthesis	transcript_id gene1130; gene_id gene1130; gene_name LLMG_RS05635; Dbxref Genbank:WP_011835018.1; Name WP_011835018.1; gbkey CDS; inference COORDINATES: similar to AA sequence:RefSeq:NP_267498.1; product polyprenyl synthetase family protein; transl_table 11; gbkey Gene; gene_biotype protein_coding; locus_tag LLMG_RS05635; old_locus_tag llmg_1110; protein_id WP_011835018.1;
llmg_0054	gene62	-1.40045	5.71414	-6.07259	0.000259448	0.00185599	0.569161	NC_009004.1	RefSeq	49908	50213	+	LLMG_RS00305;llmg_0054;	LLMG_RS00305	n	n	transcript_id gene62; gene_id gene62; gene_name LLMG_RS00305; Dbxref Genbank:WP_010905062.1; Name WP_010905062.1; gbkey CDS; inference COORDINATES: similar to AA sequence:RefSeq:NP_266202.1; product bacteriocin immunity protein; transl_table 11; gbkey Gene; gene_biotype protein_coding; locus_tag LLMG_RS00305; old_locus_tag llmg_0054; protein_id WP_010905062.1;
llmg_2520	gene2532	-0.843795	7.47715	-6.06613	0.000261361	0.00186428	0.266041	NC_009004.1	RefSeq	2476285	2476998	-	LLMG_RS12655;llmg_2520;	LLMG_RS12655	n	n	transcript_id gene2532; gene_id gene2532; gene_name LLMG_RS12655; Dbxref Genbank:WP_011836140.1; Name WP_011836140.1; gbkey CDS; inference COORDINATES: similar to AA sequence:RefSeq:NP_268398.1; product hypothetical protein; transl_table 11; gbkey Gene; gene_biotype protein_coding; locus_tag LLMG_RS12655; old_locus_tag llmg_2520; protein_id WP_011836140.1;
llmg_0214	gene227	-1.15164	8.95536	-6.06106	0.000262876	0.00186968	0.246688	NC_009004.1	RefSeq	202479	203672	+	LLMG_RS01130;llmg_0214;	LLMG_RS01130	n	n	transcript_id gene227; gene_id gene227; gene_name LLMG_RS01130; Dbxref Genbank:WP_011834297.1; Name WP_011834297.1; gbkey CDS; inference COORDINATES: similar to AA sequence:RefSeq:WP_015425698.1; product ABC transporter ATP-binding protein; transl_table 11; gbkey Gene; gene_biotype protein_coding; locus_tag LLMG_RS01130; old_locus_tag llmg_0214; protein_id WP_011834297.1;
llmg_0199	gene212	-0.990646	9.7157	-6.04888	0.000266549	0.00189035	0.336303	NC_009004.1	RefSeq	188447	190522	-	LLMG_RS01055;llmg_0199;	LLMG_RS01055	n	n	transcript_id gene212; gene_id gene212; gene_name feoB; Dbxref Genbank:WP_011834284.1; Name WP_011834284.1; gbkey CDS; inference COORDINATES: similar to AA sequence:RefSeq:NP_266343.1; product ferrous iron transport protein B; transl_table 11; Name feoB; gbkey Gene; gene_biotype protein_coding; locus_tag LLMG_RS01055; old_locus_tag llmg_0199; protein_id WP_011834284.1;
llmg_0629	gene656	-1.66382	12.0965	-6.03654	0.000270329	0.00190078	0.558396	NC_009004.1	RefSeq	618464	620827	+	LLMG_RS03285;llmg_0629;	LLMG_RS03285	llm00620, llm00640, llm00650	Pyruvate metabolism , Propanoate metabolism , Butanoate metabolism	transcript_id gene656; gene_id gene656; gene_name pflB; Dbxref Genbank:WP_011834639.1; Name WP_011834639.1; gbkey CDS; inference COORDINATES: similar to AA sequence:RefSeq:NP_266820.1; product formate acetyltransferase; transl_table 11; Name pflB; gbkey Gene; gene_biotype protein_coding; locus_tag LLMG_RS03285; old_locus_tag llmg_0629; protein_id WP_011834639.1;
llmg_1478	gene1494	-0.837184	7.5309	-6.04054	0.000269098	0.00190078	0.228977	NC_009004.1	RefSeq	1452726	1453679	-	LLMG_RS07455;llmg_1478;	LLMG_RS07455	llm00970	Aminoacyl-tRNA biosynthesis	transcript_id gene1494; gene_id gene1494; gene_name glyQ; Dbxref Genbank:WP_011835327.1; Name WP_011835327.1; gbkey CDS; inference COORDINATES: similar to AA sequence:RefSeq:NP_267251.1; product glycine--tRNA ligase subunit alpha; transl_table 11; Name glyQ; gbkey Gene; gene_biotype protein_coding; locus_tag LLMG_RS07455; old_locus_tag llmg_1478; protein_id WP_011835327.1;
llmg_1686	gene1696	-1.16386	7.84856	-6.03903	0.000269564	0.00190078	0.194131	NC_009004.1	RefSeq	1662003	1662449	-	LLMG_RS08485;llmg_1686;	LLMG_RS08485	n	n	transcript_id gene1696; gene_id gene1696; gene_name LLMG_RS08485; Dbxref Genbank:WP_011675823.1; Name WP_011675823.1; gbkey CDS; inference COORDINATES: similar to AA sequence:RefSeq:NP_267015.1; product transcriptional regulator; transl_table 11; gbkey Gene; gene_biotype protein_coding; locus_tag LLMG_RS08485; old_locus_tag llmg_1686; protein_id WP_011675823.1;
llmg_0939	gene964	-1.33282	8.58058	-6.02648	0.000273455	0.00191729	0.193097	NC_009004.1	RefSeq	907051	907896	+	LLMG_RS04790;llmg_0939;	LLMG_RS04790	n	n	transcript_id gene964; gene_id gene964; gene_name LLMG_RS04790; Dbxref Genbank:WP_011834884.1; Name WP_011834884.1; gbkey CDS; inference COORDINATES: similar to AA sequence:RefSeq:NP_267718.1; product DegV domain-containing protein; transl_table 11; gbkey Gene; gene_biotype protein_coding; locus_tag LLMG_RS04790; old_locus_tag llmg_0939; protein_id WP_011834884.1;
llmg_0930	gene955	-1.51458	8.8995	-6.01763	0.000276236	0.0019313	0.189937	NC_009004.1	RefSeq	899930	901069	+	LLMG_RS04745;llmg_0930;	LLMG_RS04745	llm00071, llm00072, llm00280, llm00362, llm00380, llm00620, llm00630, llm00640, llm00650, llm00900, llm02020	Fatty acid degradation , Synthesis and degradation of ketone bodies , Valine, leucine and isoleucine degradation , Benzoate degradation , Tryptophan metabolism , Pyruvate metabolism , Glyoxylate and dicarboxylate metabolism , Propanoate metabolism , Butanoate metabolism , Terpenoid backbone biosynthesis , Two-component system	transcript_id gene955; gene_id gene955; gene_name LLMG_RS04745; Dbxref Genbank:WP_014734990.1; Name WP_014734990.1; gbkey CDS; inference COORDINATES: similar to AA sequence:RefSeq:WP_014734990.1; product acetyl-CoA C-acyltransferase; transl_table 11; gbkey Gene; gene_biotype protein_coding; locus_tag LLMG_RS04745; old_locus_tag llmg_0930; protein_id WP_014734990.1;
llmg_2195	gene2203	-0.920287	9.39583	-6.01295	0.000277722	0.00193621	0.257874	NC_009004.1	RefSeq	2159623	2162016	-	LLMG_RS11025;llmg_2195;	LLMG_RS11025	llm00970	Aminoacyl-tRNA biosynthesis	transcript_id gene2203; gene_id gene2203; gene_name LLMG_RS11025; Dbxref Genbank:WP_011835888.1; Name WP_011835888.1; gbkey CDS; inference COORDINATES: similar to AA sequence:RefSeq:NP_268085.1; product phenylalanine--tRNA ligase subunit beta; transl_table 11; gbkey Gene; gene_biotype protein_coding; locus_tag LLMG_RS11025; old_locus_tag llmg_2195; protein_id WP_011835888.1;
llmg_1000	gene1021	1.41752	7.07275	6.00683	0.000279676	0.00193892	0.384483	NC_009004.1	RefSeq	966149	967255	+	LLMG_RS05090;llmg_1000;	LLMG_RS05090	llm00230	Purine metabolism	transcript_id gene1021; gene_id gene1021; gene_name LLMG_RS05090; Dbxref Genbank:WP_011834931.1; Name WP_011834931.1; gbkey CDS; inference COORDINATES: similar to AA sequence:RefSeq:WP_011676458.1; product 5-(carboxyamino)imidazole ribonucleotide synthase; transl_table 11; gbkey Gene; gene_biotype protein_coding; locus_tag LLMG_RS05090; old_locus_tag llmg_1000; protein_id WP_011834931.1;
llmg_1632	gene1643	-1.24635	9.50404	-6.00681	0.000279683	0.00193892	0.279415	NC_009004.1	RefSeq	1608772	1609419	-	LLMG_RS08220;llmg_1632;	LLMG_RS08220	n	n	transcript_id gene1643; gene_id gene1643; gene_name LLMG_RS08220; Dbxref Genbank:WP_011835454.1; Name WP_011835454.1; gbkey CDS; inference COORDINATES: similar to AA sequence:RefSeq:NP_267060.1; product hydrolase; transl_table 11; gbkey Gene; gene_biotype protein_coding; locus_tag LLMG_RS08220; old_locus_tag llmg_1632; protein_id WP_011835454.1;
llmg_0353	gene366	1.17671	5.98775	5.99577	0.000283245	0.00195437	0.394006	NC_009004.1	RefSeq	340413	340760	+	LLMG_RS01820;llmg_0353;	LLMG_RS01820	n	n	transcript_id gene366; gene_id gene366; gene_name LLMG_RS01820; Dbxref Genbank:WP_011834413.1; Name WP_011834413.1; gbkey CDS; inference COORDINATES: similar to AA sequence:RefSeq:NP_266490.1; product transcriptional regulator; transl_table 11; gbkey Gene; gene_biotype protein_coding; locus_tag LLMG_RS01820; old_locus_tag llmg_0353; protein_id WP_011834413.1;
llmg_2387	gene2393	1.11865	9.37683	5.995	0.000283494	0.00195437	0.225871	NC_009004.1	RefSeq	2328911	2330401	-	LLMG_RS11965;llmg_2387;	LLMG_RS11965	llm00260, llm00750	Glycine, serine and threonine metabolism , Vitamin B6 metabolism	transcript_id gene2393; gene_id gene2393; gene_name LLMG_RS11965; Dbxref Genbank:WP_011836030.1; Name WP_011836030.1; gbkey CDS; inference COORDINATES: similar to AA sequence:RefSeq:NP_268260.1; product threonine synthase; transl_table 11; gbkey Gene; gene_biotype protein_coding; locus_tag LLMG_RS11965; old_locus_tag llmg_2387; protein_id WP_011836030.1;
llmg_0069	gene77	0.839359	7.74057	5.98808	0.000285756	0.00196448	0.17018	NC_009004.1	RefSeq	63015	63896	+	LLMG_RS00380;llmg_0069;	LLMG_RS00380	n	n	transcript_id gene77; gene_id gene77; gene_name LLMG_RS00380; Dbxref Genbank:WP_011834172.1; Name WP_011834172.1; gbkey CDS; inference COORDINATES: similar to AA sequence:RefSeq:WP_003132218.1; product XRE family transcriptional regulator; transl_table 11; gbkey Gene; gene_biotype protein_coding; locus_tag LLMG_RS00380; old_locus_tag llmg_0069; protein_id WP_011834172.1;
llmg_1278	gene1299	1.66868	5.88062	5.97677	0.000289491	0.00198462	0.453801	NC_009004.1	RefSeq	1247882	1248358	-	LLMG_RS06480;llmg_1278;	LLMG_RS06480	llm00290, llm00650, llm00660, llm00770	Valine, leucine and isoleucine biosynthesis , Butanoate metabolism , C5-Branched dibasic acid metabolism , Pantothenate and CoA biosynthesis	transcript_id gene1299; gene_id gene1299; gene_name LLMG_RS06480; Dbxref Genbank:WP_011835157.1; Name WP_011835157.1; gbkey CDS; inference COORDINATES: similar to AA sequence:RefSeq:NP_267381.1; product acetolactate synthase small subunit; transl_table 11; gbkey Gene; gene_biotype protein_coding; locus_tag LLMG_RS06480; old_locus_tag llmg_1278; protein_id WP_011835157.1;
llmg_1645	gene1655	-1.43491	8.15973	-5.97435	0.000290298	0.00198464	0.117148	NC_009004.1	RefSeq	1623558	1623989	-	LLMG_RS08280;llmg_1645;	LLMG_RS08280	n	n	transcript_id gene1655; gene_id gene1655; gene_name LLMG_RS08280; Dbxref Genbank:WP_014735079.1; Name WP_014735079.1; gbkey CDS; inference COORDINATES: similar to AA sequence:RefSeq:NP_267050.1; product general stress protein; transl_table 11; gbkey Gene; gene_biotype protein_coding; locus_tag LLMG_RS08280; old_locus_tag llmg_1645; protein_id WP_014735079.1;
llmg_2416	gene2422	-1.54088	9.89733	-5.9464	0.000299795	0.0020439	0.217626	NC_009004.1	RefSeq	2359435	2359767	-	LLMG_RS12115;llmg_2416;	LLMG_RS12115	llm02024, llm03060, llm03070	Quorum sensing , Protein export , Bacterial secretion system	transcript_id gene2422; gene_id gene2422; gene_name yajC; Dbxref Genbank:WP_011836055.1; Name WP_011836055.1; gbkey CDS; inference COORDINATES: similar to AA sequence:RefSeq:WP_011677192.1; product preprotein translocase subunit YajC; transl_table 11; Name yajC; gbkey Gene; gene_biotype protein_coding; locus_tag LLMG_RS12115; old_locus_tag llmg_2416; protein_id WP_011836055.1;
llmg_0994	gene1014	1.42361	7.21511	5.94332	0.000300864	0.00204554	0.279012	NC_009004.1	RefSeq	958681	960237	+	LLMG_RS05055;llmg_0994;	LLMG_RS05055	llm00230, llm00670	Purine metabolism , One carbon pool by folate	transcript_id gene1014; gene_id gene1014; gene_name LLMG_RS05055; Dbxref Genbank:WP_011834927.1; Name WP_011834927.1; gbkey CDS; inference COORDINATES: similar to AA sequence:RefSeq:NP_267674.1; product bifunctional phosphoribosylaminoimidazolecarboxamide formyltransferase/inosine monophosphate cyclohydrolase; transl_table 11; gbkey Gene; gene_biotype protein_coding; locus_tag LLMG_RS05055; old_l…
llmg_0097	gene106	1.40426	6.29514	5.94035	0.000301897	0.00204693	0.309404	NC_009004.1	RefSeq	92097	92687	+	LLMG_RS00525;llmg_0097;	LLMG_RS00525	n	n	transcript_id gene106; gene_id gene106; gene_name LLMG_RS00525; Dbxref Genbank:WP_011834199.1; Name WP_011834199.1; gbkey CDS; inference COORDINATES: similar to AA sequence:RefSeq:NP_266234.1; product flavin reductase family protein; transl_table 11; gbkey Gene; gene_biotype protein_coding; locus_tag LLMG_RS00525; old_locus_tag llmg_0097; protein_id WP_011834199.1;
llmg_0194	gene206	-1.06097	8.82839	-5.93383	0.000304179	0.00205113	0.104178	NC_009004.1	RefSeq	182618	183715	+	LLMG_RS01025;llmg_0194;	LLMG_RS01025	n	n	transcript_id gene206; gene_id gene206; gene_name LLMG_RS01025; Dbxref Genbank:WP_011834280.1; Name WP_011834280.1; gbkey CDS; inference COORDINATES: similar to AA sequence:RefSeq:NP_266335.1; product 23S rRNA (adenine(2503)-C(2))-methyltransferase RlmN; transl_table 11; gbkey Gene; gene_biotype protein_coding; locus_tag LLMG_RS01025; old_locus_tag llmg_0194; protein_id WP_011834280.1;
llmg_1957	gene1957	0.844784	7.69619	5.9359	0.000303452	0.00205113	0.113945	NC_009004.1	RefSeq	1939205	1940137	-	LLMG_RS09790;llmg_1957;	LLMG_RS09790	n	n	transcript_id gene1957; gene_id gene1957; gene_name LLMG_RS09790; Dbxref Genbank:WP_011835697.1; Name WP_011835697.1; gbkey CDS; inference COORDINATES: similar to AA sequence:RefSeq:NP_267932.1; product DUF4162 domain-containing protein; transl_table 11; gbkey Gene; gene_biotype protein_coding; locus_tag LLMG_RS09790; old_locus_tag llmg_1957; protein_id WP_011835697.1;
llmg_1281	gene1302	1.85205	6.15957	5.90135	0.00031583	0.00211861	0.302396	NC_009004.1	RefSeq	1251922	1252704	-	LLMG_RS06495;llmg_1281;	LLMG_RS06495	llm02010	ABC transporters	transcript_id gene1302; gene_id gene1302; gene_name LLMG_RS06495; Dbxref Genbank:WP_014735027.1; Name WP_014735027.1; gbkey CDS; inference COORDINATES: similar to AA sequence:RefSeq:WP_011676307.1; product ABC transporter ATP-binding protein; transl_table 11; gbkey Gene; gene_biotype protein_coding; locus_tag LLMG_RS06495; old_locus_tag llmg_1281; protein_id WP_014735027.1;
llmg_1290	gene1311	1.49018	7.4699	5.90115	0.000315902	0.00211861	0.12641	NC_009004.1	RefSeq	1260824	1261603	-	LLMG_RS06540;llmg_1290;	LLMG_RS06540	llm00340	Histidine metabolism	transcript_id gene1311; gene_id gene1311; gene_name LLMG_RS06540; Dbxref Genbank:WP_011835167.1; Name WP_011835167.1; gbkey CDS; inference COORDINATES: similar to AA sequence:RefSeq:NP_267370.1; product imidazole glycerol phosphate synthase cyclase subunit; transl_table 11; gbkey Gene; gene_biotype protein_coding; locus_tag LLMG_RS06540; old_locus_tag llmg_1290; protein_id WP_011835167.1;
llmg_1584	gene1596	0.888833	7.2477	5.8667	0.000328799	0.00219912	0.0487797	NC_009004.1	RefSeq	1558625	1559683	-	LLMG_RS07980;llmg_1584;	LLMG_RS07980	n	n	transcript_id gene1596; gene_id gene1596; gene_name LLMG_RS07980; Dbxref Genbank:WP_011835417.1; Name WP_011835417.1; gbkey CDS; inference COORDINATES: similar to AA sequence:RefSeq:NP_267100.1; product endonuclease; transl_table 11; gbkey Gene; gene_biotype protein_coding; locus_tag LLMG_RS07980; old_locus_tag llmg_1584; protein_id WP_011835417.1;
llmg_2327	gene2333	-1.56329	7.80383	-5.85473	0.000333416	0.00222397	0.00879112	NC_009004.1	RefSeq	2284047	2284916	-	LLMG_RS11665;llmg_2327;	LLMG_RS11665	n	n	transcript_id gene2333; gene_id gene2333; gene_name LLMG_RS11665; Dbxref Genbank:WP_011677122.1; Name WP_011677122.1; gbkey CDS; inference COORDINATES: similar to AA sequence:RefSeq:NP_268205.1; product aquaporin; transl_table 11; gbkey Gene; gene_biotype protein_coding; locus_tag LLMG_RS11665; old_locus_tag llmg_2327; protein_id WP_011677122.1;
llmg_2316	gene2322	-1.14732	9.39527	-5.84648	0.000336639	0.00223942	0.0696385	NC_009004.1	RefSeq	2267316	2268647	-	LLMG_RS11610;llmg_2316;	LLMG_RS11610	llm00471, llm00550	D-Glutamine and D-glutamate metabolism , Peptidoglycan biosynthesis	transcript_id gene2322; gene_id gene2322; gene_name LLMG_RS11610; Dbxref Genbank:WP_011835988.1; Name WP_011835988.1; gbkey CDS; inference COORDINATES: similar to AA sequence:RefSeq:NP_268197.2; product UDP-N-acetylmuramate--L-alanine ligase; transl_table 11; gbkey Gene; gene_biotype protein_coding; locus_tag LLMG_RS11610; old_locus_tag llmg_2316; protein_id WP_011835988.1;
llmg_2289	gene2297	-0.99058	8.76343	-5.84377	0.000337704	0.00224047	-0.0491544	NC_009004.1	RefSeq	2242557	2243744	-	LLMG_RS11485;llmg_2289;	LLMG_RS11485	llm00430, llm00620, llm00640, llm00680	Taurine and hypotaurine metabolism , Pyruvate metabolism , Propanoate metabolism , Methane metabolism	transcript_id gene2297; gene_id gene2297; gene_name LLMG_RS11485; Dbxref Genbank:WP_011835968.1; Name WP_011835968.1; gbkey CDS; inference COORDINATES: similar to AA sequence:RefSeq:NP_268170.1; product acetate kinase; transl_table 11; gbkey Gene; gene_biotype protein_coding; locus_tag LLMG_RS11485; old_locus_tag llmg_2289; protein_id WP_011835968.1;
llmg_0554	gene578	-1.74116	5.31825	-5.82366	0.000345729	0.00226931	0.325727	NC_009004.1	RefSeq	548155	549330	-	LLMG_RS02885;llmg_0554;	LLMG_RS02885	n	n	transcript_id gene578; gene_id gene578; gene_name LLMG_RS02885; Dbxref Genbank:WP_011834582.1; Name WP_011834582.1; gbkey CDS; inference COORDINATES: similar to AA sequence:RefSeq:WP_000191693.1; product IS256-like element IS905 family transposase; transl_table 11; gbkey Gene; gene_biotype protein_coding; locus_tag LLMG_RS02885; old_locus_tag llmg_0554; protein_id WP_011834582.1;
llmg_1475	gene1492	-1.89558	6.99531	-5.82405	0.000345574	0.00226931	0.0980432	NC_009004.1	RefSeq	1450356	1450598	-	LLMG_RS07445;llmg_1475;	LLMG_RS07445	n	n	transcript_id gene1492; gene_id gene1492; gene_name LLMG_RS07445; Dbxref Genbank:WP_011835325.1; Name WP_011835325.1; gbkey CDS; inference COORDINATES: similar to AA sequence:RefSeq:NP_267253.1; product DUF896 domain-containing protein; transl_table 11; gbkey Gene; gene_biotype protein_coding; locus_tag LLMG_RS07445; old_locus_tag llmg_1475; protein_id WP_011835325.1;
llmg_1798	gene1799	-1.03483	6.24637	-5.82704	0.000344369	0.00226931	0.172668	NC_009004.1	RefSeq	1776233	1776637	+	LLMG_RS09010;llmg_1798;	LLMG_RS09010	n	n	transcript_id gene1799; gene_id gene1799; gene_name LLMG_RS09010; Dbxref Genbank:WP_011835574.1; Name WP_011835574.1; gbkey CDS; inference COORDINATES: similar to AA sequence:RefSeq:NP_266918.1; product CidA/LrgA family protein; transl_table 11; gbkey Gene; gene_biotype protein_coding; locus_tag LLMG_RS09010; old_locus_tag llmg_1798; protein_id WP_011835574.1;
llmg_2468	gene2481	-0.886088	8.06317	-5.8305	0.000342979	0.00226931	-0.0869837	NC_009004.1	RefSeq	2425675	2427183	-	LLMG_RS12400;llmg_2468;	LLMG_RS12400	llm00030	Pentose phosphate pathway	transcript_id gene2481; gene_id gene2481; gene_name gntK; Dbxref Genbank:WP_011836100.1; Name WP_011836100.1; gbkey CDS; inference COORDINATES: similar to AA sequence:RefSeq:NP_268341.1; product gluconokinase; transl_table 11; Name gntK; gbkey Gene; gene_biotype protein_coding; locus_tag LLMG_RS12400; old_locus_tag llmg_2468; protein_id WP_011836100.1;
llmg_1906	gene1905	-1.17665	9.96698	-5.81339	0.000349913	0.00229067	0.0649573	NC_009004.1	RefSeq	1883038	1885656	-	LLMG_RS09540;llmg_1906;	LLMG_RS09540	llm00970	Aminoacyl-tRNA biosynthesis	transcript_id gene1905; gene_id gene1905; gene_name LLMG_RS09540; Dbxref Genbank:WP_011835657.1; Name WP_011835657.1; gbkey CDS; inference COORDINATES: similar to AA sequence:RefSeq:WP_011835657.1; product alanine--tRNA ligase; transl_table 11; gbkey Gene; gene_biotype protein_coding; locus_tag LLMG_RS09540; old_locus_tag llmg_1906; protein_id WP_011835657.1;
llmg_1471	gene1487	-1.07162	8.26677	-5.8079	0.000352167	0.00229933	-0.0947492	NC_009004.1	RefSeq	1445594	1446082	-	LLMG_RS07420;llmg_1471;	LLMG_RS07420	n	n	transcript_id gene1487; gene_id gene1487; gene_name LLMG_RS07420; Dbxref Genbank:WP_011835321.1; Name WP_011835321.1; gbkey CDS; inference COORDINATES: similar to AA sequence:RefSeq:NP_267257.1; product N-acetyltransferase; transl_table 11; gbkey Gene; gene_biotype protein_coding; locus_tag LLMG_RS07420; old_locus_tag llmg_1471; protein_id WP_011835321.1;
llmg_0583	gene607	-1.00613	8.53604	-5.79195	0.000358816	0.00233656	-0.122185	NC_009004.1	RefSeq	571270	572055	+	LLMG_RS03030;llmg_0583;	LLMG_RS03030	n	n	transcript_id gene607; gene_id gene607; gene_name LLMG_RS03030; Dbxref Genbank:WP_011834604.1; Name WP_011834604.1; gbkey CDS; inference COORDINATES: similar to AA sequence:RefSeq:NP_266775.1; product prolipoprotein diacylglyceryl transferase; transl_table 11; gbkey Gene; gene_biotype protein_coding; locus_tag LLMG_RS03030; old_locus_tag llmg_0583; protein_id WP_011834604.1;
llmg_0276	gene289	-1.59139	9.6959	-5.78432	0.000362043	0.00234521	0.0277976	NC_009004.1	RefSeq	263015	263860	+	LLMG_RS01440;llmg_0276;	LLMG_RS01440	n	n	transcript_id gene289; gene_id gene289; gene_name LLMG_RS01440; Dbxref Genbank:WP_011675296.1; Name WP_011675296.1; gbkey CDS; inference COORDINATES: similar to AA sequence:RefSeq:NP_266424.1; product aldo/keto reductase; transl_table 11; gbkey Gene; gene_biotype protein_coding; locus_tag LLMG_RS01440; old_locus_tag llmg_0276; protein_id WP_011675296.1;
llmg_1192	gene1209	-1.00153	7.92364	-5.78602	0.000361324	0.00234521	-0.134402	NC_009004.1	RefSeq	1162320	1163048	+	LLMG_RS06035;llmg_1192;	LLMG_RS06035	n	n	transcript_id gene1209; gene_id gene1209; gene_name LLMG_RS06035; Dbxref Genbank:WP_011835091.1; Name WP_011835091.1; gbkey CDS; inference COORDINATES: similar to AA sequence:RefSeq:NP_267433.1; product segregation/condensation protein A; transl_table 11; gbkey Gene; gene_biotype protein_coding; locus_tag LLMG_RS06035; old_locus_tag llmg_1192; protein_id WP_011835091.1;
LLMG_RS08660	gene1727	1.07049	6.6776	5.75823	0.000373329	0.00241198	0.0310656	NC_009004.1	RefSeq	1697835	1698493	-	LLMG_RS08660;pseudotrue;	LLMG_RS08660	n	n	transcript_id gene1727; gene_id gene1727; gene_name LLMG_RS08660; Note frameshifted%3B internal stop; gbkey CDS; inference COORDINATES: similar to AA sequence:RefSeq:WP_015082253.1; product DNA-binding response regulator; pseudo true; transl_table 11; gbkey Gene; gene_biotype pseudogene; locus_tag LLMG_RS08660; pseudo true;
llmg_0567	gene591	1.31371	7.8566	5.73754	0.000382549	0.00245868	-0.110132	NC_009004.1	RefSeq	560241	560903	+	LLMG_RS02950;llmg_0567;	LLMG_RS02950	llm00260, llm00680	Glycine, serine and threonine metabolism , Methane metabolism	transcript_id gene591; gene_id gene591; gene_name serB; Dbxref Genbank:WP_011834593.1; Name WP_011834593.1; gbkey CDS; inference COORDINATES: similar to AA sequence:RefSeq:WP_011834593.1; product phosphoserine phosphatase SerB; transl_table 11; Name serB; gbkey Gene; gene_biotype protein_coding; locus_tag LLMG_RS02950; old_locus_tag llmg_0567; protein_id WP_011834593.1;
llmg_2248	gene2254	-1.38423	10.3968	-5.73889	0.000381943	0.00245868	0.0377887	NC_009004.1	RefSeq	2210856	2212178	-	LLMG_RS11270;llmg_2248;	LLMG_RS11270	n	n	transcript_id gene2254; gene_id gene2254; gene_name LLMG_RS11270; Dbxref Genbank:WP_011835935.1; Name WP_011835935.1; gbkey CDS; inference COORDINATES: similar to AA sequence:RefSeq:WP_011835935.1; product ATP-binding protein; transl_table 11; gbkey Gene; gene_biotype protein_coding; locus_tag LLMG_RS11270; old_locus_tag llmg_2248; protein_id WP_011835935.1;
llmg_1226	gene1243	1.18194	6.13093	5.71924	0.000390918	0.00249944	0.105425	NC_009004.1	RefSeq	1197480	1198337	+	LLMG_RS06195;llmg_1226;	LLMG_RS06195	llm00670	One carbon pool by folate	transcript_id gene1243; gene_id gene1243; gene_name metF; Dbxref Genbank:WP_011835115.1; Name WP_011835115.1; gbkey CDS; inference COORDINATES: similar to AA sequence:RefSeq:WP_011676179.1; product methylenetetrahydrofolate reductase [NAD(P)H]; transl_table 11; Name metF; gbkey Gene; gene_biotype protein_coding; locus_tag LLMG_RS06195; old_locus_tag llmg_1226; protein_id WP_011835115.1;
llmg_1353	gene1373	-1.06156	9.83299	-5.72021	0.000390466	0.00249944	-0.0655431	NC_009004.1	RefSeq	1325631	1326728	-	LLMG_RS06855;llmg_1353;	LLMG_RS06855	n	n	transcript_id gene1373; gene_id gene1373; gene_name LLMG_RS06855; Dbxref Genbank:WP_011835224.1; Name WP_011835224.1; gbkey CDS; inference COORDINATES: similar to AA sequence:RefSeq:WP_011835224.1; product toxic anion resistance protein; transl_table 11; gbkey Gene; gene_biotype protein_coding; locus_tag LLMG_RS06855; old_locus_tag llmg_1353; protein_id WP_011835224.1;
llmg_0251	gene264	-1.35379	6.70529	-5.71503	0.00039287	0.00250543	-0.0302795	NC_009004.1	RefSeq	238375	238551	+	LLMG_RS01315;llmg_0251;	LLMG_RS01315	llm03010	Ribosome	transcript_id gene264; gene_id gene264; gene_name LLMG_RS01315; Dbxref Genbank:WP_003129844.1; Name WP_003129844.1; gbkey CDS; inference COORDINATES: similar to AA sequence:RefSeq:WP_002884573.1; product 30S ribosomal protein S21; transl_table 11; gbkey Gene; gene_biotype protein_coding; locus_tag LLMG_RS01315; old_locus_tag llmg_0251; protein_id WP_003129844.1;
llmg_0120	gene129	-0.944887	7.23948	-5.70788	0.000396209	0.00252022	-0.157122	NC_009004.1	RefSeq	113679	114188	-	LLMG_RS00640;llmg_0120;	LLMG_RS00640	n	n	transcript_id gene129; gene_id gene129; gene_name LLMG_RS00640; Dbxref Genbank:WP_014734895.1; Name WP_014734895.1; gbkey CDS; inference COORDINATES: similar to AA sequence:RefSeq:WP_014734895.1; product MarR family transcriptional regulator; transl_table 11; gbkey Gene; gene_biotype protein_coding; locus_tag LLMG_RS00640; old_locus_tag llmg_0120; protein_id WP_014734895.1;
llmg_2196	gene2204	-0.735526	7.95876	-5.70397	0.000398049	0.00252541	-0.244449	NC_009004.1	RefSeq	2162127	2163164	-	LLMG_RS11030;llmg_2196;	LLMG_RS11030	llm00970	Aminoacyl-tRNA biosynthesis	transcript_id gene2204; gene_id gene2204; gene_name LLMG_RS11030; Dbxref Genbank:WP_011835889.1; Name WP_011835889.1; gbkey CDS; inference COORDINATES: similar to AA sequence:RefSeq:WP_011835889.1; product phenylalanine--tRNA ligase subunit alpha; transl_table 11; gbkey Gene; gene_biotype protein_coding; locus_tag LLMG_RS11030; old_locus_tag llmg_2196; protein_id WP_011835889.1;
llmg_1646	gene1656	-1.18547	9.13967	-5.6988	0.000400496	0.00253442	-0.169573	NC_009004.1	RefSeq	1623991	1624581	-	LLMG_RS08285;llmg_1646;	LLMG_RS08285	n	n	transcript_id gene1656; gene_id gene1656; gene_name LLMG_RS08285; Dbxref Genbank:WP_011835466.1; Name WP_011835466.1; gbkey CDS; inference COORDINATES: similar to AA sequence:RefSeq:NP_267049.1; product peptidylprolyl isomerase; transl_table 11; gbkey Gene; gene_biotype protein_coding; locus_tag LLMG_RS08285; old_locus_tag llmg_1646; protein_id WP_011835466.1;
llmg_1325	gene1345	-1.14239	9.07372	-5.67616	0.000411408	0.00259682	-0.242779	NC_009004.1	RefSeq	1301096	1302163	-	LLMG_RS06715;llmg_1325;	LLMG_RS06715	llm02010	ABC transporters	transcript_id gene1345; gene_id gene1345; gene_name LLMG_RS06715; Dbxref Genbank:WP_011835198.1; Name WP_011835198.1; gbkey CDS; inference COORDINATES: similar to AA sequence:RefSeq:NP_267322.1; product spermidine/putrescine ABC transporter substrate-binding protein; transl_table 11; gbkey Gene; gene_biotype protein_coding; locus_tag LLMG_RS06715; old_locus_tag llmg_1325; protein_id WP_011835198.…
LLMG_RS05675	gene1138	1.46533	6.46225	5.66425	0.000417278	0.00262715	-0.0367544	NC_009004.1	RefSeq	1077804	1078080	+	LLMG_RS05675;pseudotrue;	LLMG_RS05675	n	n	transcript_id gene1138; gene_id gene1138; gene_name LLMG_RS05675; Note frameshifted%3B internal stop; gbkey CDS; inference COORDINATES: similar to AA sequence:RefSeq:NP_267490.1; product hypothetical protein; pseudo true; transl_table 11; gbkey Gene; gene_biotype pseudogene; locus_tag LLMG_RS05675; pseudo true;
llmg_1310	gene1330	-1.54516	8.56863	-5.65617	0.000421315	0.00264083	-0.268174	NC_009004.1	RefSeq	1281759	1283015	-	LLMG_RS06635;llmg_1310;	LLMG_RS06635	n	n	transcript_id gene1330; gene_id gene1330; gene_name LLMG_RS06635; Dbxref Genbank:WP_011835186.1; Name WP_011835186.1; gbkey CDS; inference COORDINATES: similar to AA sequence:RefSeq:NP_267339.1; product tetratricopeptide repeat protein; transl_table 11; gbkey Gene; gene_biotype protein_coding; locus_tag LLMG_RS06635; old_locus_tag llmg_1310; protein_id WP_011835186.1;
LLMG_RS10145	gene2027	1.6141	6.51422	5.65562	0.00042159	0.00264083	-0.069994	NC_009004.1	RefSeq	2014008	2015023	-	LLMG_RS10145;pseudotrue;	LLMG_RS10145	n	n	transcript_id gene2027; gene_id gene2027; gene_name LLMG_RS10145; Note frameshifted; gbkey CDS; inference COORDINATES: similar to AA sequence:RefSeq:NP_267998.1; product dipeptide/oligopeptide/nickel ABC transporter ATP-binding protein; pseudo true; transl_table 11; gbkey Gene; gene_biotype pseudogene; locus_tag LLMG_RS10145; pseudo true;
llmg_0637	gene664	1.46185	7.49088	5.64993	0.000424459	0.00265206	-0.198225	NC_009004.1	RefSeq	632149	633387	+	LLMG_RS03325;llmg_0637;	LLMG_RS03325	llm00020, llm00480	Citrate cycle (TCA cycle) , Glutathione metabolism	transcript_id gene664; gene_id gene664; gene_name LLMG_RS03325; Dbxref Genbank:WP_011834646.1; Name WP_011834646.1; gbkey CDS; inference COORDINATES: similar to AA sequence:RefSeq:NP_266828.1; product NADP-dependent isocitrate dehydrogenase; transl_table 11; gbkey Gene; gene_biotype protein_coding; locus_tag LLMG_RS03325; old_locus_tag llmg_0637; protein_id WP_011834646.1;
llmg_1412	gene1429	1.0224	6.77173	5.64419	0.000427379	0.00265521	-0.0767971	NC_009004.1	RefSeq	1380599	1381588	-	LLMG_RS07130;llmg_1412;	LLMG_RS07130	llm00230	Purine metabolism	transcript_id gene1429; gene_id gene1429; gene_name guaC; Dbxref Genbank:WP_011835272.1; Name WP_011835272.1; gbkey CDS; inference COORDINATES: similar to AA sequence:RefSeq:NP_267301.1; product guanosine monophosphate reductase; transl_table 11; Name guaC; gbkey Gene; gene_biotype protein_coding; locus_tag LLMG_RS07130; old_locus_tag llmg_1412; protein_id WP_011835272.1;
llmg_1675	gene1684	1.25484	6.17729	5.64484	0.000427047	0.00265521	-0.0264831	NC_009004.1	RefSeq	1649325	1649987	-	LLMG_RS08425;llmg_1675;	LLMG_RS08425	n	n	transcript_id gene1684; gene_id gene1684; gene_name LLMG_RS08425; Dbxref Genbank:WP_011835483.1; Name WP_011835483.1; gbkey CDS; inference COORDINATES: similar to AA sequence:RefSeq:WP_012897517.1; product ABC transporter ATP-binding protein; transl_table 11; gbkey Gene; gene_biotype protein_coding; locus_tag LLMG_RS08425; old_locus_tag llmg_1675; protein_id WP_011835483.1;
llmg_2154	gene2154	-1.30922	8.14099	-5.6426	0.00042819	0.00265521	-0.309124	NC_009004.1	RefSeq	2115615	2115968	-	LLMG_RS10775;llmg_2154;	LLMG_RS10775	llm03020	RNA polymerase	transcript_id gene2154; gene_id gene2154; gene_name LLMG_RS10775; Dbxref Genbank:WP_011835858.1; Name WP_011835858.1; gbkey CDS; inference COORDINATES: similar to AA sequence:RefSeq:NP_268055.1; product DNA-directed RNA polymerase subunit omega; transl_table 11; gbkey Gene; gene_biotype protein_coding; locus_tag LLMG_RS10775; old_locus_tag llmg_2154; protein_id WP_011835858.1;
llmg_0914	gene939	-1.13123	8.99908	-5.61536	0.000442359	0.0027362	-0.296433	NC_009004.1	RefSeq	881125	882291	+	LLMG_RS04665;llmg_0914;	LLMG_RS04665	n	n	transcript_id gene939; gene_id gene939; gene_name LLMG_RS04665; Dbxref Genbank:WP_011834865.1; Name WP_011834865.1; gbkey CDS; inference COORDINATES: similar to AA sequence:RefSeq:NP_267744.1; product cell division protein FtsQ; transl_table 11; gbkey Gene; gene_biotype protein_coding; locus_tag LLMG_RS04665; old_locus_tag llmg_0914; protein_id WP_011834865.1;
llmg_0326	gene339	-0.739474	8.23145	-5.60852	0.000445999	0.00274031	-0.37387	NC_009004.1	RefSeq	315003	316265	+	LLMG_RS01685;llmg_0326;	LLMG_RS01685	llm00520, llm00550	Amino sugar and nucleotide sugar metabolism , Peptidoglycan biosynthesis	transcript_id gene339; gene_id gene339; gene_name LLMG_RS01685; Dbxref Genbank:WP_011834389.1; Name WP_011834389.1; gbkey CDS; inference COORDINATES: similar to AA sequence:RefSeq:NP_266468.1; product UDP-N-acetylglucosamine 1-carboxyvinyltransferase; transl_table 11; gbkey Gene; gene_biotype protein_coding; locus_tag LLMG_RS01685; old_locus_tag llmg_0326; protein_id WP_011834389.1;
llmg_0482	gene493	-1.21083	9.12951	-5.60835	0.00044609	0.00274031	-0.259776	NC_009004.1	RefSeq	473713	474897	+	LLMG_RS02455;llmg_0482;	LLMG_RS02455	n	n	transcript_id gene493; gene_id gene493; gene_name LLMG_RS02455; Dbxref Genbank:WP_011834522.1; Name WP_011834522.1; gbkey CDS; inference COORDINATES: similar to AA sequence:RefSeq:WP_015082094.1; product cell wall surface anchor protein; transl_table 11; gbkey Gene; gene_biotype protein_coding; locus_tag LLMG_RS02455; old_locus_tag llmg_0482; protein_id WP_011834522.1;
llmg_1202	gene1218	0.814651	8.85735	5.60785	0.000446356	0.00274031	-0.306422	NC_009004.1	RefSeq	1168869	1170686	+	LLMG_RS06080;llmg_1202;	LLMG_RS06080	llm02010	ABC transporters	transcript_id gene1218; gene_id gene1218; gene_name LLMG_RS06080; Dbxref Genbank:WP_011835099.1; Name WP_011835099.1; gbkey CDS; inference COORDINATES: similar to AA sequence:RefSeq:NP_267429.1; product multidrug ABC transporter permease/ATP-binding protein; transl_table 11; gbkey Gene; gene_biotype protein_coding; locus_tag LLMG_RS06080; old_locus_tag llmg_1202; protein_id WP_011835099.1;
llmg_2412	gene2418	-1.15306	10.1401	-5.59558	0.000452969	0.00277401	-0.206087	NC_009004.1	RefSeq	2354322	2356172	-	LLMG_RS12095;llmg_2412;	LLMG_RS12095	llm00970	Aminoacyl-tRNA biosynthesis	transcript_id gene2418; gene_id gene2418; gene_name LLMG_RS12095; Dbxref Genbank:WP_011836051.1; Name WP_011836051.1; gbkey CDS; inference COORDINATES: similar to AA sequence:RefSeq:NP_268284.1; product proline--tRNA ligase; transl_table 11; gbkey Gene; gene_biotype protein_coding; locus_tag LLMG_RS12095; old_locus_tag llmg_2412; protein_id WP_011836051.1;
llmg_2008	gene2008	-0.941953	9.82002	-5.59144	0.000455224	0.00278092	-0.214267	NC_009004.1	RefSeq	1993652	1996483	-	LLMG_RS10050;llmg_2008;	LLMG_RS10050	llm03420	Nucleotide excision repair	transcript_id gene2008; gene_id gene2008; gene_name LLMG_RS10050; Dbxref Genbank:WP_011835736.1; Name WP_011835736.1; gbkey CDS; inference COORDINATES: similar to AA sequence:RefSeq:WP_011835736.1; product excinuclease ABC subunit UvrA; transl_table 11; gbkey Gene; gene_biotype protein_coding; locus_tag LLMG_RS10050; old_locus_tag llmg_2008; protein_id WP_011835736.1;
llmg_0500	gene511	0.994333	6.9194	5.5865	0.000457931	0.00279055	-0.202102	NC_009004.1	RefSeq	492425	493228	+	LLMG_RS02545;llmg_0500;	LLMG_RS02545	n	n	transcript_id gene511; gene_id gene511; gene_name LLMG_RS02545; Dbxref Genbank:WP_011834539.1; Name WP_011834539.1; gbkey CDS; inference COORDINATES: similar to AA sequence:RefSeq:WP_015082098.1; product arylamine N-acetyltransferase; transl_table 11; gbkey Gene; gene_biotype protein_coding; locus_tag LLMG_RS02545; old_locus_tag llmg_0500; protein_id WP_011834539.1;
llmg_0222	gene235	-1.33337	9.01139	-5.5812	0.000460861	0.00279498	-0.355018	NC_009004.1	RefSeq	210754	211752	+	LLMG_RS01170;llmg_0222;	LLMG_RS01170	n	n	transcript_id gene235; gene_id gene235; gene_name LLMG_RS01170; Dbxref Genbank:WP_011834305.1; Name WP_011834305.1; gbkey CDS; inference COORDINATES: similar to AA sequence:RefSeq:WP_011834305.1; product glycosyl transferase; transl_table 11; gbkey Gene; gene_biotype protein_coding; locus_tag LLMG_RS01170; old_locus_tag llmg_0222; protein_id WP_011834305.1;
llmg_1441	gene1458	-0.805098	8.35326	-5.58109	0.000460922	0.00279498	-0.404348	NC_009004.1	RefSeq	1407163	1408671	-	LLMG_RS07275;llmg_1441;	LLMG_RS07275	llm00020, llm00190, llm00620, llm00650, llm02020	Citrate cycle (TCA cycle) , Oxidative phosphorylation , Pyruvate metabolism , Butanoate metabolism , Two-component system	transcript_id gene1458; gene_id gene1458; gene_name LLMG_RS07275; Dbxref Genbank:WP_011835294.1; Name WP_011835294.1; gbkey CDS; inference COORDINATES: similar to AA sequence:RefSeq:NP_267280.1; product flavocytochrome c; transl_table 11; gbkey Gene; gene_biotype protein_coding; locus_tag LLMG_RS07275; old_locus_tag llmg_1441; protein_id WP_011835294.1;
llmg_0206	gene219	-1.15176	9.62205	-5.57176	0.000466117	0.00281955	-0.27867	NC_009004.1	RefSeq	195461	196330	+	LLMG_RS01090;llmg_0206;	LLMG_RS01090	llm00521, llm00523, llm00525	Streptomycin biosynthesis , Polyketide sugar unit biosynthesis , Acarbose and validamycin biosynthesis	transcript_id gene219; gene_id gene219; gene_name rfbA; Dbxref Genbank:WP_011834289.1; Name WP_011834289.1; gbkey CDS; inference COORDINATES: similar to AA sequence:RefSeq:YP_001035358.1; product glucose-1-phosphate thymidylyltransferase; transl_table 11; Name rfbA; gbkey Gene; gene_biotype protein_coding; locus_tag LLMG_RS01090; old_locus_tag llmg_0206; protein_id WP_011834289.1;
llmg_1799	gene1800	-1.01045	6.96235	-5.55505	0.000475592	0.00286983	-0.313894	NC_009004.1	RefSeq	1776656	1777354	+	LLMG_RS09015;llmg_1799;	LLMG_RS09015	n	n	transcript_id gene1800; gene_id gene1800; gene_name LLMG_RS09015; Dbxref Genbank:WP_011675731.1; Name WP_011675731.1; gbkey CDS; inference COORDINATES: similar to AA sequence:RefSeq:NP_266917.1; product LrgB family protein; transl_table 11; gbkey Gene; gene_biotype protein_coding; locus_tag LLMG_RS09015; old_locus_tag llmg_1799; protein_id WP_011675731.1;
llmg_0238	gene251	-0.866722	7.24327	-5.54994	0.000478532	0.00288053	-0.360562	NC_009004.1	RefSeq	227495	227926	+	LLMG_RS01250;llmg_0238;	LLMG_RS01250	n	n	transcript_id gene251; gene_id gene251; gene_name LLMG_RS01250; Dbxref Genbank:WP_011834320.1; Name WP_011834320.1; gbkey CDS; inference COORDINATES: similar to AA sequence:RefSeq:WP_011834320.1; product N-acetyltransferase; transl_table 11; gbkey Gene; gene_biotype protein_coding; locus_tag LLMG_RS01250; old_locus_tag llmg_0238; protein_id WP_011834320.1;
llmg_0766	gene798	-0.833093	9.23191	-5.54437	0.000481759	0.0028929	-0.337751	NC_009004.1	RefSeq	754626	756893	+	LLMG_RS03960;llmg_0766;	LLMG_RS03960	n	n	transcript_id gene798; gene_id gene798; gene_name LLMG_RS03960; Dbxref Genbank:WP_011834750.1; Name WP_011834750.1; gbkey CDS; inference COORDINATES: similar to AA sequence:RefSeq:WP_011834750.1; product DNA translocase FtsK; transl_table 11; gbkey Gene; gene_biotype protein_coding; locus_tag LLMG_RS03960; old_locus_tag llmg_0766; protein_id WP_011834750.1;
llmg_2409	gene2415	-0.866726	9.99246	-5.51669	0.000498145	0.00298403	-0.3198	NC_009004.1	RefSeq	2347351	2352258	-	LLMG_RS12080;llmg_2409;	LLMG_RS12080	llm03030, llm03430, llm03440	DNA replication , Mismatch repair , Homologous recombination	transcript_id gene2415; gene_id gene2415; gene_name LLMG_RS12080; Dbxref Genbank:WP_011836049.1; Name WP_011836049.1; gbkey CDS; inference COORDINATES: similar to AA sequence:RefSeq:WP_003133503.1; product PolC-type DNA polymerase III; transl_table 11; gbkey Gene; gene_biotype protein_coding; locus_tag LLMG_RS12080; old_locus_tag llmg_2409; protein_id WP_011836049.1;
llmg_2359	gene2367	-1.46049	9.15625	-5.49915	0.000508844	0.00304075	-0.442622	NC_009004.1	RefSeq	2313809	2314456	-	LLMG_RS11835;llmg_2359;	LLMG_RS11835	llm00230, llm00730	Purine metabolism , Thiamine metabolism	transcript_id gene2367; gene_id gene2367; gene_name LLMG_RS11835; Dbxref Genbank:WP_011677149.1; Name WP_011677149.1; gbkey CDS; inference COORDINATES: similar to AA sequence:RefSeq:NP_268234.1; product adenylate kinase; transl_table 11; gbkey Gene; gene_biotype protein_coding; locus_tag LLMG_RS11835; old_locus_tag llmg_2359; protein_id WP_011677149.1;
llmg_0510	gene521	-0.904161	8.30837	-5.4783	0.000521894	0.00304613	-0.538089	NC_009004.1	RefSeq	502253	502885	-	LLMG_RS02595;llmg_0510;	LLMG_RS02595	llm00620	Pyruvate metabolism	transcript_id gene521; gene_id gene521; gene_name LLMG_RS02595; Dbxref Genbank:WP_011834548.1; Name WP_011834548.1; gbkey CDS; inference COORDINATES: similar to AA sequence:RefSeq:NP_266698.1; product MBL fold metallo-hydrolase; transl_table 11; gbkey Gene; gene_biotype protein_coding; locus_tag LLMG_RS02595; old_locus_tag llmg_0510; protein_id WP_011834548.1;
llmg_0517	gene528	-1.10624	9.67979	-5.47853	0.000521746	0.00304613	-0.397768	NC_009004.1	RefSeq	508088	509368	+	LLMG_RS02630;llmg_0517;	LLMG_RS02630	llm00520, llm00550	Amino sugar and nucleotide sugar metabolism , Peptidoglycan biosynthesis	transcript_id gene528; gene_id gene528; gene_name murA; Dbxref Genbank:WP_011834554.1; Name WP_011834554.1; gbkey CDS; inference COORDINATES: similar to AA sequence:RefSeq:WP_003135176.1; product UDP-N-acetylglucosamine 1-carboxyvinyltransferase; transl_table 11; Name murA; gbkey Gene; gene_biotype protein_coding; locus_tag LLMG_RS02630; old_locus_tag llmg_0517; protein_id WP_011834554.1;
llmg_0881	gene907	1.1202	7.03579	5.47912	0.000521371	0.00304613	-0.415538	NC_009004.1	RefSeq	853408	854115	+	LLMG_RS04505;llmg_0881;	LLMG_RS04505	n	n	transcript_id gene907; gene_id gene907; gene_name LLMG_RS04505; Dbxref Genbank:WP_011834842.1; Name WP_011834842.1; gbkey CDS; inference COORDINATES: similar to AA sequence:RefSeq:NP_267769.1; product branched-chain amino acid ABC transporter permease; transl_table 11; gbkey Gene; gene_biotype protein_coding; locus_tag LLMG_RS04505; old_locus_tag llmg_0881; protein_id WP_011834842.1;
llmg_0933	gene958	-0.930186	7.25241	-5.48869	0.000515347	0.00304613	-0.446608	NC_009004.1	RefSeq	902802	903041	+	LLMG_RS04760;llmg_0933;	LLMG_RS04760	n	n	transcript_id gene958; gene_id gene958; gene_name LLMG_RS04760; Dbxref Genbank:WP_011676598.1; Name WP_011676598.1; gbkey CDS; inference COORDINATES: similar to AA sequence:RefSeq:NP_267724.1; product KH domain-containing protein; transl_table 11; gbkey Gene; gene_biotype protein_coding; locus_tag LLMG_RS04760; old_locus_tag llmg_0933; protein_id WP_011676598.1;
llmg_1047	gene1067	-1.19621	8.58139	-5.49185	0.000513374	0.00304613	-0.477513	NC_009004.1	RefSeq	1010159	1010779	+	LLMG_RS05320;llmg_1047;	LLMG_RS05320	n	n	transcript_id gene1067; gene_id gene1067; gene_name LLMG_RS05320; Dbxref Genbank:WP_011676410.1; Name WP_011676410.1; gbkey CDS; inference COORDINATES: similar to AA sequence:RefSeq:NP_267609.1; product GntR family transcriptional regulator; transl_table 11; gbkey Gene; gene_biotype protein_coding; locus_tag LLMG_RS05320; old_locus_tag llmg_1047; protein_id WP_011676410.1;
llmg_1335	gene1355	-0.966643	6.92052	-5.48156	0.000519831	0.00304613	-0.368033	NC_009004.1	RefSeq	1311762	1312262	-	LLMG_RS06765;llmg_1335;	LLMG_RS06765	llm00790	Folate biosynthesis	transcript_id gene1355; gene_id gene1355; gene_name LLMG_RS06765; Dbxref Genbank:WP_011835208.1; Name WP_011835208.1; gbkey CDS; inference COORDINATES: similar to AA sequence:RefSeq:WP_014572580.1; product DHNTP pyrophosphohydrolase; transl_table 11; gbkey Gene; gene_biotype protein_coding; locus_tag LLMG_RS06765; old_locus_tag llmg_1335; protein_id WP_011835208.1;
llmg_1629	gene1640	1.41379	9.05312	5.47983	0.00052092	0.00304613	-0.436614	NC_009004.1	RefSeq	1605419	1606156	-	LLMG_RS08205;llmg_1629;	LLMG_RS08205	n	n	transcript_id gene1640; gene_id gene1640; gene_name LLMG_RS08205; Dbxref Genbank:WP_011835453.1; Name WP_011835453.1; gbkey CDS; inference COORDINATES: similar to AA sequence:RefSeq:WP_011835453.1; product class I SAM-dependent methyltransferase; transl_table 11; gbkey Gene; gene_biotype protein_coding; locus_tag LLMG_RS08205; old_locus_tag llmg_1629; protein_id WP_011835453.1;
llmg_1634	gene1645	0.819574	8.66842	5.48497	0.000517679	0.00304613	-0.482621	NC_009004.1	RefSeq	1610468	1612048	-	LLMG_RS08230;llmg_1634;	LLMG_RS08230	n	n	transcript_id gene1645; gene_id gene1645; gene_name LLMG_RS08230; Dbxref Genbank:WP_011835456.1; Name WP_011835456.1; gbkey CDS; inference COORDINATES: similar to AA sequence:RefSeq:WP_014572815.1; product hypothetical protein; transl_table 11; gbkey Gene; gene_biotype protein_coding; locus_tag LLMG_RS08230; old_locus_tag llmg_1634; protein_id WP_011835456.1;
llmg_1899	gene1898	-0.732063	7.53193	-5.47799	0.000522087	0.00304613	-0.501692	NC_009004.1	RefSeq	1877477	1878400	-	LLMG_RS09505;llmg_1899;	LLMG_RS09505	llm02010	ABC transporters	transcript_id gene1898; gene_id gene1898; gene_name pstC; Dbxref Genbank:WP_011835652.1; Name WP_011835652.1; gbkey CDS; inference COORDINATES: similar to AA sequence:RefSeq:NP_267875.1; product phosphate ABC transporter permease subunit PstC; transl_table 11; Name pstC; gbkey Gene; gene_biotype protein_coding; locus_tag LLMG_RS09505; old_locus_tag llmg_1899; protein_id WP_011835652.1;
llmg_1927	gene1926	-1.04019	8.00349	-5.48028	0.000520638	0.00304613	-0.527644	NC_009004.1	RefSeq	1907629	1908693	-	LLMG_RS09645;llmg_1927;	LLMG_RS09645	llm00400, llm00401	Phenylalanine, tyrosine and tryptophan biosynthesis , Novobiocin biosynthesis	transcript_id gene1926; gene_id gene1926; gene_name LLMG_RS09645; Dbxref Genbank:WP_011835675.1; Name WP_011835675.1; gbkey CDS; inference COORDINATES: similar to AA sequence:RefSeq:NP_267901.1; product prephenate dehydrogenase; transl_table 11; gbkey Gene; gene_biotype protein_coding; locus_tag LLMG_RS09645; old_locus_tag llmg_1927; protein_id WP_011835675.1;
llmg_1464	gene1481	-1.65875	8.72137	-5.47321	0.000525132	0.00305666	-0.486591	NC_009004.1	RefSeq	1438148	1438813	-	LLMG_RS07390;llmg_1464;	LLMG_RS07390	llm00650, llm00660	Butanoate metabolism , C5-Branched dibasic acid metabolism	transcript_id gene1481; gene_id gene1481; gene_name LLMG_RS07390; Dbxref Genbank:WP_011835316.1; Name WP_011835316.1; gbkey CDS; inference COORDINATES: similar to AA sequence:RefSeq:NP_267263.1; product alpha-acetolactate decarboxylase; transl_table 11; gbkey Gene; gene_biotype protein_coding; locus_tag LLMG_RS07390; old_locus_tag llmg_1464; protein_id WP_011835316.1;
llmg_2187	gene2195	-0.820902	8.80365	-5.46516	0.000530298	0.00307224	-0.500773	NC_009004.1	RefSeq	2154235	2155533	-	LLMG_RS10985;llmg_2187;	LLMG_RS10985	n	n	transcript_id gene2195; gene_id gene2195; gene_name LLMG_RS10985; Dbxref Genbank:WP_011835881.1; Name WP_011835881.1; gbkey CDS; inference COORDINATES: similar to AA sequence:RefSeq:NP_268080.1; product DNA recombination protein RmuC; transl_table 11; gbkey Gene; gene_biotype protein_coding; locus_tag LLMG_RS10985; old_locus_tag llmg_2187; protein_id WP_011835881.1;
llmg_2308	gene2314	-1.1592	8.63311	-5.46585	0.000529855	0.00307224	-0.45474	NC_009004.1	RefSeq	2257126	2258256	-	LLMG_RS11570;llmg_2308;	LLMG_RS11570	n	n	transcript_id gene2314; gene_id gene2314; gene_name LLMG_RS11570; Dbxref Genbank:WP_011835981.1; Name WP_011835981.1; gbkey CDS; inference COORDINATES: similar to AA sequence:RefSeq:WP_011677104.1; product aminotransferase; transl_table 11; gbkey Gene; gene_biotype protein_coding; locus_tag LLMG_RS11570; old_locus_tag llmg_2308; protein_id WP_011835981.1;
LLMG_RS04975	gene1001	1.04006	6.56038	5.4598	0.000533775	0.00308515	-0.353833	NC_009004.1	RefSeq	942639	943262	+	LLMG_RS04975;	LLMG_RS04975	n	n	transcript_id gene1001; gene_id gene1001; gene_name LLMG_RS04975; Dbxref Genbank:WP_015082608.1; Name WP_015082608.1; gbkey CDS; inference COORDINATES: similar to AA sequence:RefSeq:NP_267683.1; product NADH dehydrogenase; transl_table 11; gbkey Gene; gene_biotype protein_coding; locus_tag LLMG_RS04975; protein_id WP_015082608.1;
llmg_1969	gene1971	-1.09421	10.1508	-5.44301	0.000544811	0.00314158	-0.394422	NC_009004.1	RefSeq	1950420	1951832	-	LLMG_RS09865;llmg_1969;	LLMG_RS09865	n	n	transcript_id gene1971; gene_id gene1971; gene_name sufB; Dbxref Genbank:WP_004255207.1; Name WP_004255207.1; gbkey CDS; inference COORDINATES: similar to AA sequence:RefSeq:NP_267945.1; product Fe-S cluster assembly protein SufB; transl_table 11; Name sufB; gbkey Gene; gene_biotype protein_coding; locus_tag LLMG_RS09865; old_locus_tag llmg_1969; protein_id WP_004255207.1;
LLMG_RS10765	gene2152	-0.979985	8.50651	-5.44037	0.00054657	0.00314437	-0.577613	NC_009004.1	RefSeq	2111987	2113069	-	LLMG_RS10765;partialtrue;pseudotrue;start_range.,2111987;	LLMG_RS10765	n	n	transcript_id gene2152; gene_id gene2152; gene_name LLMG_RS10765; Note frameshifted%3B incomplete%3B partial in the middle of a contig%3B missing stop; gbkey CDS; inference COORDINATES: similar to AA sequence:RefSeq:WP_011676965.1; partial true; product winged helix DNA-binding domain-containing protein; pseudo true; start_range .,2111987; transl_table 11; gbkey Gene; gene_biotype pseudogene; loc…
llmg_1424	gene1440	-1.62662	9.41813	-5.4376	0.000548423	0.00314769	-0.480503	NC_009004.1	RefSeq	1390877	1391635	-	LLMG_RS07185;llmg_1424;	LLMG_RS07185	llm00010, llm00051, llm00562	Glycolysis / Gluconeogenesis , Fructose and mannose metabolism , Inositol phosphate metabolism	transcript_id gene1440; gene_id gene1440; gene_name LLMG_RS07185; Dbxref Genbank:WP_011835282.1; Name WP_011835282.1; gbkey CDS; inference COORDINATES: similar to AA sequence:RefSeq:NP_267290.1; product triose-phosphate isomerase; transl_table 11; gbkey Gene; gene_biotype protein_coding; locus_tag LLMG_RS07185; old_locus_tag llmg_1424; protein_id WP_011835282.1;
llmg_0309	gene322	-1.03872	8.93537	-5.41984	0.000560461	0.00320932	-0.540833	NC_009004.1	RefSeq	295382	296407	+	LLMG_RS01605;llmg_0309;	LLMG_RS01605	n	n	transcript_id gene322; gene_id gene322; gene_name tsaD; Dbxref Genbank:WP_011834374.1; Name WP_011834374.1; gbkey CDS; inference COORDINATES: similar to AA sequence:RefSeq:NP_266451.1; product tRNA (adenosine(37)-N6)-threonylcarbamoyltransferase complex transferase subunit TsaD; transl_table 11; Name tsaD; gbkey Gene; gene_biotype protein_coding; locus_tag LLMG_RS01605; old_locus_tag llmg_0309; p…
llmg_1176	gene1193	-1.16483	7.48074	-5.40859	0.000568238	0.00324632	-0.570867	NC_009004.1	RefSeq	1143206	1143979	+	LLMG_RS05955;llmg_1176;	LLMG_RS05955	llm03030	DNA replication	transcript_id gene1193; gene_id gene1193; gene_name LLMG_RS05955; Dbxref Genbank:WP_011835077.1; Name WP_011835077.1; gbkey CDS; inference COORDINATES: similar to AA sequence:RefSeq:NP_267449.1; product ribonuclease HII; transl_table 11; gbkey Gene; gene_biotype protein_coding; locus_tag LLMG_RS05955; old_locus_tag llmg_1176; protein_id WP_011835077.1;
llmg_0617	gene644	-1.67056	12.4833	-5.39814	0.000575562	0.00328057	-0.224223	NC_009004.1	RefSeq	606184	607485	+	LLMG_RS03215;llmg_0617;	LLMG_RS03215	llm00010, llm00680, llm03018	Glycolysis / Gluconeogenesis , Methane metabolism , RNA degradation	transcript_id gene644; gene_id gene644; gene_name LLMG_RS03215; Dbxref Genbank:WP_010905473.1; Name WP_010905473.1; gbkey CDS; inference COORDINATES: similar to AA sequence:RefSeq:WP_002985288.1; product enolase; transl_table 11; gbkey Gene; gene_biotype protein_coding; locus_tag LLMG_RS03215; old_locus_tag llmg_0617; protein_id WP_010905473.1;
llmg_0277	gene290	-0.920665	7.68997	-5.39505	0.000577747	0.00328544	-0.629073	NC_009004.1	RefSeq	264100	264612	+	LLMG_RS01445;llmg_0277;	LLMG_RS01445	n	n	transcript_id gene290; gene_id gene290; gene_name LLMG_RS01445; Dbxref Genbank:WP_011834351.1; Name WP_011834351.1; gbkey CDS; inference COORDINATES: similar to AA sequence:RefSeq:WP_011675297.1; product cysteine hydrolase; transl_table 11; gbkey Gene; gene_biotype protein_coding; locus_tag LLMG_RS01445; old_locus_tag llmg_0277; protein_id WP_011834351.1;
llmg_0212	gene225	-0.945858	8.31616	-5.36317	0.000600841	0.00340891	-0.6909	NC_009004.1	RefSeq	200717	201658	+	LLMG_RS01120;llmg_0212;	LLMG_RS01120	n	n	transcript_id gene225; gene_id gene225; gene_name LLMG_RS01120; Dbxref Genbank:WP_011834295.1; Name WP_011834295.1; gbkey CDS; inference COORDINATES: similar to AA sequence:RefSeq:WP_011834295.1; product glycosyltransferase family 2 protein; transl_table 11; gbkey Gene; gene_biotype protein_coding; locus_tag LLMG_RS01120; old_locus_tag llmg_0212; protein_id WP_011834295.1;
llmg_0590	gene614	1.04495	7.73067	5.34673	0.000613137	0.00347069	-0.653355	NC_009004.1	RefSeq	579634	580299	+	LLMG_RS03060;llmg_0590;	LLMG_RS03060	n	n	transcript_id gene614; gene_id gene614; gene_name LLMG_RS03060; Dbxref Genbank:WP_011675765.1; Name WP_011675765.1; gbkey CDS; inference COORDINATES: similar to AA sequence:RefSeq:NP_266781.1; product YitT family protein; transl_table 11; gbkey Gene; gene_biotype protein_coding; locus_tag LLMG_RS03060; old_locus_tag llmg_0590; protein_id WP_011675765.1;
llmg_1211	gene1229	0.971367	6.88108	5.33995	0.00061829	0.00349185	-0.55972	NC_009004.1	RefSeq	1179098	1179934	+	LLMG_RS06125;llmg_1211;	LLMG_RS06125	n	n	transcript_id gene1229; gene_id gene1229; gene_name LLMG_RS06125; Dbxref Genbank:WP_011835104.1; Name WP_011835104.1; gbkey CDS; inference COORDINATES: similar to AA sequence:RefSeq:WP_015082481.1; product DUF4811 domain-containing protein; transl_table 11; gbkey Gene; gene_biotype protein_coding; locus_tag LLMG_RS06125; old_locus_tag llmg_1211; protein_id WP_011835104.1;
llmg_0229	gene242	0.735235	8.3445	5.32979	0.000626098	0.00352787	-0.702052	NC_009004.1	RefSeq	218798	219991	-	LLMG_RS13045;llmg_0229;	LLMG_RS13045	n	n	transcript_id gene242; gene_id gene242; gene_name LLMG_RS13045; Dbxref Genbank:WP_014734909.1; Name WP_014734909.1; gbkey CDS; inference COORDINATES: similar to AA sequence:RefSeq:WP_011675255.1; product hypothetical protein; transl_table 11; gbkey Gene; gene_biotype protein_coding; locus_tag LLMG_RS13045; old_locus_tag llmg_0229; protein_id WP_014734909.1;
llmg_0067	gene76	1.0908	7.80238	5.32492	0.000629883	0.00353399	-0.668284	NC_009004.1	RefSeq	62146	62901	+	LLMG_RS00375;llmg_0067;	LLMG_RS00375	llm03440	Homologous recombination	transcript_id gene76; gene_id gene76; gene_name LLMG_RS00375; Dbxref Genbank:WP_011834171.1; Name WP_011834171.1; gbkey CDS; inference COORDINATES: similar to AA sequence:RefSeq:NP_266214.1; product DNA repair protein RecO; transl_table 11; gbkey Gene; gene_biotype protein_coding; locus_tag LLMG_RS00375; old_locus_tag llmg_0067; protein_id WP_011834171.1;
llmg_0236	gene249	-0.853925	7.16658	-5.32471	0.000630047	0.00353399	-0.634176	NC_009004.1	RefSeq	226266	226865	+	LLMG_RS01240;llmg_0236;	LLMG_RS01240	llm00760	Nicotinate and nicotinamide metabolism	transcript_id gene249; gene_id gene249; gene_name LLMG_RS01240; Dbxref Genbank:WP_011834318.1; Name WP_011834318.1; gbkey CDS; inference COORDINATES: similar to AA sequence:RefSeq:NP_266381.1; product nicotinate-nucleotide adenylyltransferase; transl_table 11; gbkey Gene; gene_biotype protein_coding; locus_tag LLMG_RS01240; old_locus_tag llmg_0236; protein_id WP_011834318.1;
llmg_0999	gene1020	1.4356	5.55463	5.31431	0.000638205	0.00356355	-0.328503	NC_009004.1	RefSeq	965608	966093	+	LLMG_RS05085;llmg_0999;	LLMG_RS05085	llm00230	Purine metabolism	transcript_id gene1020; gene_id gene1020; gene_name purE; Dbxref Genbank:WP_011676459.1; Name WP_011676459.1; gbkey CDS; inference COORDINATES: similar to AA sequence:RefSeq:WP_011676459.1; product 5-(carboxyamino)imidazole ribonucleotide mutase; transl_table 11; Name purE; gbkey Gene; gene_biotype protein_coding; locus_tag LLMG_RS05085; old_locus_tag llmg_0999; protein_id WP_011676459.1;
llmg_1187	gene1204	-0.835984	8.01203	-5.31502	0.000637649	0.00356355	-0.758897	NC_009004.1	RefSeq	1159140	1159955	+	LLMG_RS06010;llmg_1187;	LLMG_RS06010	llm00471	D-Glutamine and D-glutamate metabolism	transcript_id gene1204; gene_id gene1204; gene_name LLMG_RS06010; Dbxref Genbank:WP_011835087.1; Name WP_011835087.1; gbkey CDS; inference COORDINATES: similar to AA sequence:RefSeq:WP_011835087.1; product glutamate racemase; transl_table 11; gbkey Gene; gene_biotype protein_coding; locus_tag LLMG_RS06010; old_locus_tag llmg_1187; protein_id WP_011835087.1;
llmg_0608	gene635	-1.33385	9.5624	-5.31134	0.000640558	0.00356862	-0.623852	NC_009004.1	RefSeq	596618	597184	+	LLMG_RS03165;llmg_0608;	LLMG_RS03165	llm03020	RNA polymerase	transcript_id gene635; gene_id gene635; gene_name LLMG_RS03165; Dbxref Genbank:WP_011834624.1; Name WP_011834624.1; gbkey CDS; inference COORDINATES: similar to AA sequence:RefSeq:NP_266790.1; product DNA-directed RNA polymerase subunit delta; transl_table 11; gbkey Gene; gene_biotype protein_coding; locus_tag LLMG_RS03165; old_locus_tag llmg_0608; protein_id WP_011834624.1;
llmg_0223	gene236	-1.41066	8.83038	-5.30345	0.000646849	0.00359555	-0.73117	NC_009004.1	RefSeq	211819	212853	+	LLMG_RS01175;llmg_0223;	LLMG_RS01175	n	n	transcript_id gene236; gene_id gene236; gene_name LLMG_RS01175; Dbxref Genbank:WP_011834306.1; Name WP_011834306.1; gbkey CDS; inference COORDINATES: similar to AA sequence:RefSeq:WP_011834306.1; product hypothetical protein; transl_table 11; gbkey Gene; gene_biotype protein_coding; locus_tag LLMG_RS01175; old_locus_tag llmg_0223; protein_id WP_011834306.1;
llmg_0218	gene231	-0.99258	8.06201	-5.29502	0.000653652	0.00361982	-0.771767	NC_009004.1	RefSeq	207861	208580	+	LLMG_RS01150;llmg_0218;	LLMG_RS01150	n	n	transcript_id gene231; gene_id gene231; gene_name LLMG_RS01150; Dbxref Genbank:WP_041931240.1; Name WP_041931240.1; gbkey CDS; inference COORDINATES: similar to AA sequence:RefSeq:WP_010749361.1; product glycosyltransferase family 2 protein; transl_table 11; gbkey Gene; gene_biotype protein_coding; locus_tag LLMG_RS01150; old_locus_tag llmg_0218; protein_id WP_041931240.1;
LLMG_RS13160	gene1190	1.2934	4.26725	5.29441	0.000654148	0.00361982	-0.31532	NC_009004.1	RefSeq	1141252	1141371	+	LLMG_RS13160;partialtrue;pseudotrue;start_range.,1141252;	LLMG_RS13160	n	n	transcript_id gene1190; gene_id gene1190; gene_name LLMG_RS13160; Note incomplete%3B partial in the middle of a contig%3B missing start; gbkey CDS; inference COORDINATES: protein motif:HMM:PF00746.19; partial true; product hypothetical protein; pseudo true; start_range .,1141252; transl_table 11; gbkey Gene; gene_biotype pseudogene; locus_tag LLMG_RS13160; partial true; pseudo true; start_range .…
llmg_1852	gene1853	0.933122	7.12702	5.2907	0.000657164	0.00362837	-0.656519	NC_009004.1	RefSeq	1831263	1831481	+	LLMG_RS09280;llmg_1852;	LLMG_RS09280	n	n	transcript_id gene1853; gene_id gene1853; gene_name LLMG_RS09280; Dbxref Genbank:WP_011675679.1; Name WP_011675679.1; gbkey CDS; inference COORDINATES: similar to AA sequence:RefSeq:NP_266871.1; product DNA-binding protein; transl_table 11; gbkey Gene; gene_biotype protein_coding; locus_tag LLMG_RS09280; old_locus_tag llmg_1852; protein_id WP_011675679.1;
llmg_1311	gene1331	-0.850118	8.7093	-5.28506	0.000661788	0.00364574	-0.764807	NC_009004.1	RefSeq	1283043	1284215	-	LLMG_RS06640;llmg_1311;	LLMG_RS06640	n	n	transcript_id gene1331; gene_id gene1331; gene_name LLMG_RS06640; Dbxref Genbank:WP_011835187.1; Name WP_011835187.1; gbkey CDS; inference COORDINATES: similar to AA sequence:RefSeq:WP_011835187.1; product AI-2E family transporter; transl_table 11; gbkey Gene; gene_biotype protein_coding; locus_tag LLMG_RS06640; old_locus_tag llmg_1311; protein_id WP_011835187.1;
llmg_2386	gene2392	0.71455	8.71514	5.28202	0.000664289	0.00365137	-0.750221	NC_009004.1	RefSeq	2327625	2328914	-	LLMG_RS11960;llmg_2386;	LLMG_RS11960	n	n	transcript_id gene2392; gene_id gene2392; gene_name LLMG_RS11960; Dbxref Genbank:WP_011836029.1; Name WP_011836029.1; gbkey CDS; inference COORDINATES: similar to AA sequence:RefSeq:WP_011677164.1; product MATE family efflux transporter; transl_table 11; gbkey Gene; gene_biotype protein_coding; locus_tag LLMG_RS11960; old_locus_tag llmg_2386; protein_id WP_011836029.1;
llmg_1067	gene1086	-1.04423	9.17531	-5.27935	0.000666496	0.00365536	-0.710546	NC_009004.1	RefSeq	1026184	1027737	-	LLMG_RS05415;llmg_1067;	LLMG_RS05415	n	n	transcript_id gene1086; gene_id gene1086; gene_name LLMG_RS05415; Dbxref Genbank:WP_011834981.1; Name WP_011834981.1; gbkey CDS; inference COORDINATES: similar to AA sequence:RefSeq:NP_267592.1; product two-component sensor histidine kinase; transl_table 11; gbkey Gene; gene_biotype protein_coding; locus_tag LLMG_RS05415; old_locus_tag llmg_1067; protein_id WP_011834981.1;
llmg_0213	gene226	-0.881231	8.2933	-5.26507	0.000678446	0.00371265	-0.82443	NC_009004.1	RefSeq	201655	202464	+	LLMG_RS01125;llmg_0213;	LLMG_RS01125	n	n	transcript_id gene226; gene_id gene226; gene_name LLMG_RS01125; Dbxref Genbank:WP_011834296.1; Name WP_011834296.1; gbkey CDS; inference COORDINATES: similar to AA sequence:RefSeq:NP_266358.1; product ABC transporter permease; transl_table 11; gbkey Gene; gene_biotype protein_coding; locus_tag LLMG_RS01125; old_locus_tag llmg_0213; protein_id WP_011834296.1;
llmg_0130	gene140	1.1973	7.33671	5.25726	0.000685075	0.00374063	-0.691059	NC_009004.1	RefSeq	123974	124909	-	LLMG_RS00700;llmg_0130;	LLMG_RS00700	n	n	transcript_id gene140; gene_id gene140; gene_name LLMG_RS00700; Dbxref Genbank:WP_014734899.1; Name WP_014734899.1; gbkey CDS; inference COORDINATES: similar to AA sequence:RefSeq:NP_266277.1; product alpha/beta hydrolase; transl_table 11; gbkey Gene; gene_biotype protein_coding; locus_tag LLMG_RS00700; old_locus_tag llmg_0130; protein_id WP_014734899.1;
llmg_0084	gene92	-1.02254	8.43723	-5.23539	0.000704027	0.00383057	-0.846737	NC_009004.1	RefSeq	78941	79753	-	LLMG_RS00455;llmg_0084;	LLMG_RS00455	n	n	transcript_id gene92; gene_id gene92; gene_name LLMG_RS00455; Dbxref Genbank:WP_011834187.1; Name WP_011834187.1; gbkey CDS; inference COORDINATES: similar to AA sequence:RefSeq:NP_266227.1; product HAD family hydrolase; transl_table 11; gbkey Gene; gene_biotype protein_coding; locus_tag LLMG_RS00455; old_locus_tag llmg_0084; protein_id WP_011834187.1;
llmg_1351	gene1371	-1.01848	9.94366	-5.23468	0.00070465	0.00383057	-0.691241	NC_009004.1	RefSeq	1324343	1324918	-	LLMG_RS06845;llmg_1351;	LLMG_RS06845	n	n	transcript_id gene1371; gene_id gene1371; gene_name LLMG_RS06845; Dbxref Genbank:WP_011835222.1; Name WP_011835222.1; gbkey CDS; inference COORDINATES: similar to AA sequence:RefSeq:WP_011835222.1; product TerD family protein; transl_table 11; gbkey Gene; gene_biotype protein_coding; locus_tag LLMG_RS06845; old_locus_tag llmg_1351; protein_id WP_011835222.1;
llmg_0083	gene91	-0.842669	8.2443	-5.23001	0.000708778	0.00384453	-0.870838	NC_009004.1	RefSeq	77843	78838	-	LLMG_RS00450;llmg_0083;	LLMG_RS00450	llm00561	Glycerolipid metabolism	transcript_id gene91; gene_id gene91; gene_name LLMG_RS00450; Dbxref Genbank:WP_011834186.1; Name WP_011834186.1; gbkey CDS; inference COORDINATES: similar to AA sequence:RefSeq:NP_266226.1; product phosphate acyltransferase; transl_table 11; gbkey Gene; gene_biotype protein_coding; locus_tag LLMG_RS00450; old_locus_tag llmg_0083; protein_id WP_011834186.1;
llmg_0184	gene196	-1.0975	7.48584	-5.22741	0.000711084	0.00384859	-0.837741	NC_009004.1	RefSeq	173038	173418	+	LLMG_RS00975;llmg_0184;	LLMG_RS00975	llm00620	Pyruvate metabolism	transcript_id gene196; gene_id gene196; gene_name LLMG_RS00975; Dbxref Genbank:WP_011834272.1; Name WP_011834272.1; gbkey CDS; inference COORDINATES: similar to AA sequence:RefSeq:WP_014571892.1; product hypothetical protein; transl_table 11; gbkey Gene; gene_biotype protein_coding; locus_tag LLMG_RS00975; old_locus_tag llmg_0184; protein_id WP_011834272.1;
llmg_1470	gene1486	-1.44644	8.94776	-5.21837	0.000719175	0.00388386	-0.795559	NC_009004.1	RefSeq	1444713	1445537	-	LLMG_RS07415;llmg_1470;	LLMG_RS07415	llm00760	Nicotinate and nicotinamide metabolism	transcript_id gene1486; gene_id gene1486; gene_name LLMG_RS07415; Dbxref Genbank:WP_011835320.1; Name WP_011835320.1; gbkey CDS; inference COORDINATES: similar to AA sequence:RefSeq:NP_267258.1; product NAD(+) synthetase; transl_table 11; gbkey Gene; gene_biotype protein_coding; locus_tag LLMG_RS07415; old_locus_tag llmg_1470; protein_id WP_011835320.1;
llmg_1063	gene1082	-1.09292	6.95333	-5.21445	0.000722717	0.00389446	-0.745325	NC_009004.1	RefSeq	1023030	1023422	+	LLMG_RS05395;llmg_1063;	LLMG_RS05395	llm00240	Pyrimidine metabolism	transcript_id gene1082; gene_id gene1082; gene_name LLMG_RS05395; Dbxref Genbank:WP_011676395.1; Name WP_011676395.1; gbkey CDS; inference COORDINATES: similar to AA sequence:RefSeq:NP_267595.1; product cytidine deaminase; transl_table 11; gbkey Gene; gene_biotype protein_coding; locus_tag LLMG_RS05395; old_locus_tag llmg_1063; protein_id WP_011676395.1;
llmg_0132	gene142	-1.27734	5.50629	-5.20397	0.00073227	0.00393734	-0.53885	NC_009004.1	RefSeq	126611	126964	+	LLMG_RS00710;llmg_0132;	LLMG_RS00710	n	n	transcript_id gene142; gene_id gene142; gene_name LLMG_RS00710; Dbxref Genbank:WP_080506500.1; Name WP_080506500.1; gbkey CDS; inference COORDINATES: similar to AA sequence:RefSeq:NP_266278.1; product QacE family quaternary ammonium compound efflux SMR transporter; transl_table 11; gbkey Gene; gene_biotype protein_coding; locus_tag LLMG_RS00710; old_locus_tag llmg_0132; protein_id WP_080506500.1;
llmg_0495	gene506	-1.32614	7.56814	-5.19624	0.000739401	0.00394988	-0.873867	NC_009004.1	RefSeq	489514	490170	+	LLMG_RS02520;llmg_0495;	LLMG_RS02520	n	n	transcript_id gene506; gene_id gene506; gene_name LLMG_RS02520; Dbxref Genbank:WP_011834535.1; Name WP_011834535.1; gbkey CDS; inference COORDINATES: similar to AA sequence:RefSeq:NP_266657.1; product DUF2140 domain-containing protein; transl_table 11; gbkey Gene; gene_biotype protein_coding; locus_tag LLMG_RS02520; old_locus_tag llmg_0495; protein_id WP_011834535.1;
llmg_1793	gene1795	-0.934165	7.18983	-5.19946	0.000736416	0.00394988	-0.759837	NC_009004.1	RefSeq	1773370	1773675	-	LLMG_RS08990;llmg_1793;	LLMG_RS08990	n	n	transcript_id gene1795; gene_id gene1795; gene_name LLMG_RS08990; Dbxref Genbank:WP_011675736.1; Name WP_011675736.1; gbkey CDS; inference COORDINATES: similar to AA sequence:RefSeq:NP_266922.1; product hypothetical protein; transl_table 11; gbkey Gene; gene_biotype protein_coding; locus_tag LLMG_RS08990; old_locus_tag llmg_1793; protein_id WP_011675736.1;
llmg_1794	gene1796	-1.05665	7.23898	-5.19787	0.000737893	0.00394988	-0.771409	NC_009004.1	RefSeq	1773678	1774004	-	LLMG_RS08995;llmg_1794;	LLMG_RS08995	n	n	transcript_id gene1796; gene_id gene1796; gene_name LLMG_RS08995; Dbxref Genbank:WP_011675735.1; Name WP_011675735.1; gbkey CDS; inference COORDINATES: similar to AA sequence:RefSeq:NP_266921.1; product DUF448 domain-containing protein; transl_table 11; gbkey Gene; gene_biotype protein_coding; locus_tag LLMG_RS08995; old_locus_tag llmg_1794; protein_id WP_011675735.1;
llmg_0096	gene105	1.24405	7.10515	5.16046	0.000773419	0.00409613	-0.844969	NC_009004.1	RefSeq	90917	92086	+	LLMG_RS00520;llmg_0096;	LLMG_RS00520	n	n	transcript_id gene105; gene_id gene105; gene_name LLMG_RS00520; Dbxref Genbank:WP_011834198.1; Name WP_011834198.1; gbkey CDS; inference COORDINATES: similar to AA sequence:RefSeq:WP_014571789.1; product ring-cleaving dioxygenase; transl_table 11; gbkey Gene; gene_biotype protein_coding; locus_tag LLMG_RS00520; old_locus_tag llmg_0096; protein_id WP_011834198.1;
llmg_0329	gene342	1.38517	7.6831	5.16152	0.000772388	0.00409613	-0.858321	NC_009004.1	RefSeq	317445	319160	+	LLMG_RS01700;llmg_0329;	LLMG_RS01700	n	n	transcript_id gene342; gene_id gene342; gene_name LLMG_RS01700; Dbxref Genbank:WP_011834391.1; Name WP_011834391.1; gbkey CDS; inference COORDINATES: similar to AA sequence:RefSeq:WP_011834391.1; product ABC transporter ATP-binding protein; transl_table 11; gbkey Gene; gene_biotype protein_coding; locus_tag LLMG_RS01700; old_locus_tag llmg_0329; protein_id WP_011834391.1;
llmg_0417	gene429	-0.843353	8.17195	-5.16485	0.000769158	0.00409613	-0.960141	NC_009004.1	RefSeq	410790	411572	+	LLMG_RS02135;llmg_0417;	LLMG_RS02135	n	n	transcript_id gene429; gene_id gene429; gene_name LLMG_RS02135; Dbxref Genbank:WP_011834464.1; Name WP_011834464.1; gbkey CDS; inference COORDINATES: similar to AA sequence:RefSeq:NP_266556.1; product hypothetical protein; transl_table 11; gbkey Gene; gene_biotype protein_coding; locus_tag LLMG_RS02135; old_locus_tag llmg_0417; protein_id WP_011834464.1;
llmg_0703	gene732	1.54344	7.04061	5.16366	0.000770313	0.00409613	-0.772801	NC_009004.1	RefSeq	691571	692890	+	LLMG_RS03625;llmg_0703;	LLMG_RS03625	n	n	transcript_id gene732; gene_id gene732; gene_name LLMG_RS03625; Dbxref Genbank:WP_011834695.1; Name WP_011834695.1; gbkey CDS; inference COORDINATES: similar to AA sequence:RefSeq:WP_002367719.1; product IS4 family transposase IS1675; transl_table 11; gbkey Gene; gene_biotype protein_coding; locus_tag LLMG_RS03625; old_locus_tag llmg_0703; protein_id WP_011834695.1;
llmg_0202	gene215	-1.10083	10.3427	-5.15464	0.000779118	0.00411748	-0.752159	NC_009004.1	RefSeq	191970	193634	-	LLMG_RS01070;llmg_0202;	LLMG_RS01070	n	n	transcript_id gene215; gene_id gene215; gene_name LLMG_RS01070; Dbxref Genbank:WP_011834287.1; Name WP_011834287.1; gbkey CDS; inference COORDINATES: similar to AA sequence:RefSeq:NP_266346.2; product DAK2 domain-containing protein; transl_table 11; gbkey Gene; gene_biotype protein_coding; locus_tag LLMG_RS01070; old_locus_tag llmg_0202; protein_id WP_011834287.1;
llmg_0555	gene579	-0.775886	7.20759	-5.13381	0.000799876	0.00421815	-0.893817	NC_009004.1	RefSeq	549717	550286	+	LLMG_RS02890;llmg_0555;	LLMG_RS02890	llm00240	Pyrimidine metabolism	transcript_id gene579; gene_id gene579; gene_name LLMG_RS02890; Dbxref Genbank:WP_011675593.1; Name WP_011675593.1; gbkey CDS; inference COORDINATES: similar to AA sequence:RefSeq:NP_266749.1; product thymidine kinase; transl_table 11; gbkey Gene; gene_biotype protein_coding; locus_tag LLMG_RS02890; old_locus_tag llmg_0555; protein_id WP_011675593.1;
llmg_2198	gene2206	-1.01427	9.7625	-5.12884	0.000804917	0.00423568	-0.843247	NC_009004.1	RefSeq	2164419	2164958	+	LLMG_RS11040;llmg_2198;	LLMG_RS11040	n	n	transcript_id gene2206; gene_id gene2206; gene_name LLMG_RS11040; Dbxref Genbank:WP_011835891.1; Name WP_011835891.1; gbkey CDS; inference COORDINATES: similar to AA sequence:RefSeq:NP_268106.1; product PadR family transcriptional regulator; transl_table 11; gbkey Gene; gene_biotype protein_coding; locus_tag LLMG_RS11040; old_locus_tag llmg_2198; protein_id WP_011835891.1;
llmg_0599	gene625	-0.934608	8.81063	-5.12141	0.000812516	0.00425751	-0.988069	NC_009004.1	RefSeq	586683	588290	+	LLMG_RS03115;llmg_0599;	LLMG_RS03115	n	n	transcript_id gene625; gene_id gene625; gene_name LLMG_RS03115; Dbxref Genbank:WP_011834615.1; Name WP_011834615.1; gbkey CDS; inference COORDINATES: similar to AA sequence:RefSeq:WP_011834615.1; product membrane protein; transl_table 11; gbkey Gene; gene_biotype protein_coding; locus_tag LLMG_RS03115; old_locus_tag llmg_0599; protein_id WP_011834615.1;
llmg_1635	gene1646	0.730019	7.82315	5.12235	0.000811549	0.00425751	-0.956938	NC_009004.1	RefSeq	1612029	1612793	-	LLMG_RS08235;llmg_1635;	LLMG_RS08235	n	n	transcript_id gene1646; gene_id gene1646; gene_name LLMG_RS08235; Dbxref Genbank:WP_011835457.1; Name WP_011835457.1; gbkey CDS; inference COORDINATES: similar to AA sequence:RefSeq:WP_011835457.1; product ABC transporter ATP-binding protein; transl_table 11; gbkey Gene; gene_biotype protein_coding; locus_tag LLMG_RS08235; old_locus_tag llmg_1635; protein_id WP_011835457.1;
llmg_0117	gene126	-0.792377	7.75479	-5.11689	0.00081717	0.00426379	-1.00476	NC_009004.1	RefSeq	110683	111306	+	LLMG_RS00625;llmg_0117;	LLMG_RS00625	llm00010	Glycolysis / Gluconeogenesis	transcript_id gene126; gene_id gene126; gene_name LLMG_RS00625; Dbxref Genbank:WP_011834215.1; Name WP_011834215.1; gbkey CDS; inference COORDINATES: similar to AA sequence:RefSeq:NP_266266.1; product HAD family phosphatase; transl_table 11; gbkey Gene; gene_biotype protein_coding; locus_tag LLMG_RS00625; old_locus_tag llmg_0117; protein_id WP_011834215.1;
llmg_1805	gene1806	-1.13237	8.93938	-5.1171	0.000816963	0.00426379	-0.982094	NC_009004.1	RefSeq	1786335	1787645	-	LLMG_RS09045;llmg_1805;	LLMG_RS09045	n	n	transcript_id gene1806; gene_id gene1806; gene_name LLMG_RS09045; Dbxref Genbank:WP_011675724.1; Name WP_011675724.1; gbkey CDS; inference COORDINATES: similar to AA sequence:RefSeq:WP_018377046.1; product ribosome biogenesis GTPase Der; transl_table 11; gbkey Gene; gene_biotype protein_coding; locus_tag LLMG_RS09045; old_locus_tag llmg_1805; protein_id WP_011675724.1;
llmg_0055	gene63	-0.745158	7.82256	-5.04832	0.00089159	0.00463856	-1.10417	NC_009004.1	RefSeq	50463	51647	+	LLMG_RS00310;llmg_0055;	LLMG_RS00310	n	n	transcript_id gene63; gene_id gene63; gene_name LLMG_RS00310; Dbxref Genbank:WP_011834162.1; Name WP_011834162.1; gbkey CDS; inference COORDINATES: similar to AA sequence:RefSeq:NP_266203.1; product site-specific integrase; transl_table 11; gbkey Gene; gene_biotype protein_coding; locus_tag LLMG_RS00310; old_locus_tag llmg_0055; protein_id WP_011834162.1;
llmg_0516	gene527	-0.889634	7.54878	-5.04729	0.000892753	0.00463856	-1.0756	NC_009004.1	RefSeq	507232	507993	+	LLMG_RS02625;llmg_0516;	LLMG_RS02625	llm00521, llm00562	Streptomycin biosynthesis , Inositol phosphate metabolism	transcript_id gene527; gene_id gene527; gene_name LLMG_RS02625; Dbxref Genbank:WP_011834553.1; Name WP_011834553.1; gbkey CDS; inference COORDINATES: similar to AA sequence:RefSeq:WP_014573085.1; product inositol monophosphatase family protein; transl_table 11; gbkey Gene; gene_biotype protein_coding; locus_tag LLMG_RS02625; old_locus_tag llmg_0516; protein_id WP_011834553.1;
llmg_0281	gene294	-0.962996	9.53964	-5.03716	0.000904373	0.00468906	-1.01392	NC_009004.1	RefSeq	267262	269505	+	LLMG_RS01465;llmg_0281;	LLMG_RS01465	llm00230, llm00240	Purine metabolism , Pyrimidine metabolism	transcript_id gene294; gene_id gene294; gene_name LLMG_RS01465; Dbxref Genbank:WP_011834354.1; Name WP_011834354.1; gbkey CDS; inference COORDINATES: similar to AA sequence:RefSeq:NP_266429.1; product anaerobic ribonucleoside-triphosphate reductase; transl_table 11; gbkey Gene; gene_biotype protein_coding; locus_tag LLMG_RS01465; old_locus_tag llmg_0281; protein_id WP_011834354.1;
llmg_1725	gene1730	-0.992562	9.18803	-5.03357	0.000908535	0.00470077	-1.0441	NC_009004.1	RefSeq	1701740	1702870	-	LLMG_RS08675;llmg_1725;	LLMG_RS08675	llm04122	Sulfur relay system	transcript_id gene1730; gene_id gene1730; gene_name LLMG_RS08675; Dbxref Genbank:WP_041931319.1; Name WP_041931319.1; gbkey CDS; inference COORDINATES: similar to AA sequence:RefSeq:WP_031286465.1; product tRNA 2-thiouridine(34) synthase MnmA; transl_table 11; gbkey Gene; gene_biotype protein_coding; locus_tag LLMG_RS08675; old_locus_tag llmg_1725; protein_id WP_041931319.1;
llmg_1154	gene1173	-0.744247	8.60058	-5.02159	0.000922557	0.00476333	-1.12472	NC_009004.1	RefSeq	1122001	1123887	+	LLMG_RS05860;llmg_1154;	LLMG_RS05860	llm00790	Folate biosynthesis	transcript_id gene1173; gene_id gene1173; gene_name pabB; Dbxref Genbank:WP_011835056.1; Name WP_011835056.1; gbkey CDS; inference COORDINATES: similar to AA sequence:RefSeq:NP_267470.1; product aminodeoxychorismate synthase%2C component I; transl_table 11; Name pabB; gbkey Gene; gene_biotype protein_coding; locus_tag LLMG_RS05860; old_locus_tag llmg_1154; protein_id WP_011835056.1;
llmg_0872	gene898	0.68129	7.78527	5.00365	0.000944013	0.00486394	-1.11582	NC_009004.1	RefSeq	842158	842625	+	LLMG_RS04460;llmg_0872;	LLMG_RS04460	n	n	transcript_id gene898; gene_id gene898; gene_name LLMG_RS04460; Dbxref Genbank:WP_011834834.1; Name WP_011834834.1; gbkey CDS; inference COORDINATES: similar to AA sequence:RefSeq:WP_011834834.1; product NUDIX domain-containing protein; transl_table 11; gbkey Gene; gene_biotype protein_coding; locus_tag LLMG_RS04460; old_locus_tag llmg_0872; protein_id WP_011834834.1;
llmg_0138	gene150	1.68398	9.14301	4.98877	0.000962212	0.00493044	-0.925047	NC_009004.1	RefSeq	134048	135241	+	LLMG_RS00750;llmg_0138;	LLMG_RS00750	llm00220, llm00250	Arginine biosynthesis , Alanine, aspartate and glutamate metabolism	transcript_id gene150; gene_id gene150; gene_name LLMG_RS00750; Dbxref Genbank:WP_014734903.1; Name WP_014734903.1; gbkey CDS; inference COORDINATES: similar to AA sequence:RefSeq:NP_266280.2; product argininosuccinate synthase; transl_table 11; gbkey Gene; gene_biotype protein_coding; locus_tag LLMG_RS00750; old_locus_tag llmg_0138; protein_id WP_014734903.1;
llmg_2062	gene2058	-0.78949	8.4751	-4.9882	0.000962913	0.00493044	-1.19696	NC_009004.1	RefSeq	2045022	2045891	-	LLMG_RS10295;llmg_2062;	LLMG_RS10295	n	n	transcript_id gene2058; gene_id gene2058; gene_name LLMG_RS10295; Dbxref Genbank:WP_011835776.1; Name WP_011835776.1; gbkey CDS; inference COORDINATES: similar to AA sequence:RefSeq:NP_268028.1; product DegV family protein; transl_table 11; gbkey Gene; gene_biotype protein_coding; locus_tag LLMG_RS10295; old_locus_tag llmg_2062; protein_id WP_011835776.1;
llmg_2286	gene2295	-0.829436	7.42011	-4.99024	0.000960393	0.00493044	-1.18152	NC_009004.1	RefSeq	2240629	2241081	-	LLMG_RS11475;llmg_2286;	LLMG_RS11475	n	n	transcript_id gene2295; gene_id gene2295; gene_name LLMG_RS11475; Dbxref Genbank:WP_011835966.1; Name WP_011835966.1; gbkey CDS; inference COORDINATES: similar to AA sequence:RefSeq:NP_268168.1; product hypothetical protein; transl_table 11; gbkey Gene; gene_biotype protein_coding; locus_tag LLMG_RS11475; old_locus_tag llmg_2286; protein_id WP_011835966.1;
llmg_0300	gene315	1.24196	5.22392	4.97814	0.000975438	0.00498423	-0.820221	NC_009004.1	RefSeq	290224	290661	-	LLMG_RS01570;llmg_0300;	LLMG_RS01570	n	n	transcript_id gene315; gene_id gene315; gene_name LLMG_RS01570; Dbxref Genbank:WP_011834369.1; Name WP_011834369.1; gbkey CDS; inference COORDINATES: similar to AA sequence:RefSeq:WP_011834369.1; product nuclear transport factor 2 family protein; transl_table 11; gbkey Gene; gene_biotype protein_coding; locus_tag LLMG_RS01570; old_locus_tag llmg_0300; protein_id WP_011834369.1;
llmg_0873	gene899	0.695231	7.99884	4.97401	0.000980643	0.00500047	-1.1777	NC_009004.1	RefSeq	842612	843067	+	LLMG_RS04465;llmg_0873;	LLMG_RS04465	n	n	transcript_id gene899; gene_id gene899; gene_name LLMG_RS04465; Dbxref Genbank:WP_011834835.1; Name WP_011834835.1; gbkey CDS; inference COORDINATES: similar to AA sequence:RefSeq:NP_267777.1; product NUDIX domain-containing protein; transl_table 11; gbkey Gene; gene_biotype protein_coding; locus_tag LLMG_RS04465; old_locus_tag llmg_0873; protein_id WP_011834835.1;
llmg_2281	gene2290	1.01733	7.82043	4.97002	0.000985682	0.0050158	-1.13669	NC_009004.1	RefSeq	2236972	2237493	-	LLMG_RS11450;llmg_2281;	LLMG_RS11450	n	n	transcript_id gene2290; gene_id gene2290; gene_name msrA; Dbxref Genbank:WP_011835962.1; Name WP_011835962.1; gbkey CDS; inference COORDINATES: similar to AA sequence:RefSeq:WP_011835962.1; product peptide-methionine (S)-S-oxide reductase; transl_table 11; Name msrA; gbkey Gene; gene_biotype protein_coding; locus_tag LLMG_RS11450; old_locus_tag llmg_2281; protein_id WP_011835962.1;
LLMG_RS06520	gene1307	1.31848	7.68322	4.95892	0.000999873	0.00507754	-1.13995	NC_009004.1	RefSeq	1256447	1257987	-	LLMG_RS06520;pseudotrue;	LLMG_RS06520	n	n	transcript_id gene1307; gene_id gene1307; gene_name LLMG_RS06520; Note frameshifted; gbkey CDS; inference COORDINATES: similar to AA sequence:RefSeq:WP_015426398.1; product 2-isopropylmalate synthase; pseudo true; transl_table 11; gbkey Gene; gene_biotype pseudogene; locus_tag LLMG_RS06520; pseudo true;
llmg_0600	gene626	-1.20281	8.25346	-4.95641	0.00100312	0.00508356	-1.23337	NC_009004.1	RefSeq	588208	589146	+	LLMG_RS03120;llmg_0600;	LLMG_RS03120	n	n	transcript_id gene626; gene_id gene626; gene_name LLMG_RS03120; Dbxref Genbank:WP_011834616.1; Name WP_011834616.1; gbkey CDS; inference COORDINATES: similar to AA sequence:RefSeq:WP_011834616.1; product glycosyltransferase; transl_table 11; gbkey Gene; gene_biotype protein_coding; locus_tag LLMG_RS03120; old_locus_tag llmg_0600; protein_id WP_011834616.1;
llmg_1414	gene1431	-1.34853	8.45691	-4.94655	0.00101595	0.00513452	-1.22128	NC_009004.1	RefSeq	1382610	1383383	-	LLMG_RS07140;llmg_1414;	LLMG_RS07140	llm00627	Aminobenzoate degradation	transcript_id gene1431; gene_id gene1431; gene_name LLMG_RS07140; Dbxref Genbank:WP_011835274.1; Name WP_011835274.1; gbkey CDS; inference COORDINATES: similar to AA sequence:RefSeq:NP_267299.1; product TIGR01457 family HAD-type hydrolase; transl_table 11; gbkey Gene; gene_biotype protein_coding; locus_tag LLMG_RS07140; old_locus_tag llmg_1414; protein_id WP_011835274.1;
llmg_1908	gene1907	-1.03163	6.71796	-4.9455	0.00101733	0.00513452	-1.06383	NC_009004.1	RefSeq	1886991	1887683	-	LLMG_RS09550;llmg_1908;	LLMG_RS09550	n	n	transcript_id gene1907; gene_id gene1907; gene_name LLMG_RS09550; Dbxref Genbank:WP_011835659.1; Name WP_011835659.1; gbkey CDS; inference COORDINATES: similar to AA sequence:RefSeq:WP_011835659.1; product O-methyltransferase; transl_table 11; gbkey Gene; gene_biotype protein_coding; locus_tag LLMG_RS09550; old_locus_tag llmg_1908; protein_id WP_011835659.1;
llmg_1051	gene1071	1.80453	8.35109	4.92782	0.00104083	0.00524238	-1.17902	NC_009004.1	RefSeq	1014345	1014908	-	LLMG_RS05340;llmg_1051;	LLMG_RS05340	n	n	transcript_id gene1071; gene_id gene1071; gene_name LLMG_RS05340; Dbxref Genbank:WP_041931288.1; Name WP_041931288.1; gbkey CDS; inference COORDINATES: similar to AA sequence:RefSeq:NP_267605.1; product TetR family transcriptional regulator; transl_table 11; gbkey Gene; gene_biotype protein_coding; locus_tag LLMG_RS05340; old_locus_tag llmg_1051; protein_id WP_041931288.1;
llmg_0465	gene475	-0.813483	7.46789	-4.91926	0.00105243	0.00529	-1.22239	NC_009004.1	RefSeq	459065	459607	+	LLMG_RS02365;llmg_0465;	LLMG_RS02365	n	n	transcript_id gene475; gene_id gene475; gene_name LLMG_RS02365; Dbxref Genbank:WP_011834506.1; Name WP_011834506.1; gbkey CDS; inference COORDINATES: similar to AA sequence:RefSeq:NP_266645.1; product TIGR01440 family protein; transl_table 11; gbkey Gene; gene_biotype protein_coding; locus_tag LLMG_RS02365; old_locus_tag llmg_0465; protein_id WP_011834506.1;
llmg_0301	gene316	1.18546	5.46915	4.9107	0.00106416	0.00533809	-0.93654	NC_009004.1	RefSeq	290697	291065	-	LLMG_RS01575;llmg_0301;	LLMG_RS01575	n	n	transcript_id gene316; gene_id gene316; gene_name LLMG_RS01575; Dbxref Genbank:WP_011834370.1; Name WP_011834370.1; gbkey CDS; inference COORDINATES: similar to AA sequence:RefSeq:WP_014571983.1; product MerR family transcriptional regulator; transl_table 11; gbkey Gene; gene_biotype protein_coding; locus_tag LLMG_RS01575; old_locus_tag llmg_0301; protein_id WP_011834370.1;
llmg_0408	gene419	-1.42353	12.0416	-4.88923	0.00109421	0.00545556	-0.920797	NC_009004.1	RefSeq	401822	403162	+	LLMG_RS02085;llmg_0408;	LLMG_RS02085	n	n	transcript_id gene419; gene_id gene419; gene_name LLMG_RS02085; Dbxref Genbank:WP_011834457.1; Name WP_011834457.1; gbkey CDS; inference COORDINATES: similar to AA sequence:RefSeq:NP_266547.1; product NADH oxidase; transl_table 11; gbkey Gene; gene_biotype protein_coding; locus_tag LLMG_RS02085; old_locus_tag llmg_0408; protein_id WP_011834457.1;
llmg_1114	gene1134	-0.861181	9.46899	-4.88991	0.00109324	0.00545556	-1.20556	NC_009004.1	RefSeq	1073311	1074339	-	LLMG_RS05655;llmg_1114;	LLMG_RS05655	llm00564	Glycerophospholipid metabolism	transcript_id gene1134; gene_id gene1134; gene_name LLMG_RS05655; Dbxref Genbank:WP_011835022.1; Name WP_011835022.1; gbkey CDS; inference COORDINATES: similar to AA sequence:RefSeq:NP_267494.1; product glycerol-3-phosphate dehydrogenase (NAD(P)(+)); transl_table 11; gbkey Gene; gene_biotype protein_coding; locus_tag LLMG_RS05655; old_locus_tag llmg_1114; protein_id WP_011835022.1;
llmg_1825	gene1825	-0.713384	7.7416	-4.89057	0.00109231	0.00545556	-1.32658	NC_009004.1	RefSeq	1804587	1805510	-	LLMG_RS09140;llmg_1825;	LLMG_RS09140	llm00920	Sulfur metabolism	transcript_id gene1825; gene_id gene1825; gene_name LLMG_RS09140; Dbxref Genbank:WP_011835596.1; Name WP_011835596.1; gbkey CDS; inference COORDINATES: similar to AA sequence:RefSeq:NP_266891.1; product bifunctional oligoribonuclease/PAP phosphatase NrnA; transl_table 11; gbkey Gene; gene_biotype protein_coding; locus_tag LLMG_RS09140; old_locus_tag llmg_1825; protein_id WP_011835596.1;
llmg_1284	gene1305	1.36857	7.04667	4.88724	0.00109704	0.00545868	-1.15987	NC_009004.1	RefSeq	1253875	1255251	-	LLMG_RS06510;llmg_1284;	LLMG_RS06510	llm00290, llm00660	Valine, leucine and isoleucine biosynthesis , C5-Branched dibasic acid metabolism	transcript_id gene1305; gene_id gene1305; gene_name leuC; Dbxref Genbank:WP_011835163.1; Name WP_011835163.1; gbkey CDS; inference COORDINATES: similar to AA sequence:RefSeq:NP_267376.1; product 3-isopropylmalate dehydratase large subunit; transl_table 11; Name leuC; gbkey Gene; gene_biotype protein_coding; locus_tag LLMG_RS06510; old_locus_tag llmg_1284; protein_id WP_011835163.1;
llmg_0746	gene777	-0.95084	8.09695	-4.8678	0.00112513	0.00558565	-1.3671	NC_009004.1	RefSeq	732522	733496	+	LLMG_RS03855;llmg_0746;	LLMG_RS03855	n	n	transcript_id gene777; gene_id gene777; gene_name LLMG_RS03855; Dbxref Genbank:WP_011834733.1; Name WP_011834733.1; gbkey CDS; inference COORDINATES: similar to AA sequence:RefSeq:NP_267832.1; product LacI family transcriptional regulator; transl_table 11; gbkey Gene; gene_biotype protein_coding; locus_tag LLMG_RS03855; old_locus_tag llmg_0746; protein_id WP_011834733.1;
LLMG_RS06575	gene1318	1.45624	3.67446	4.86646	0.00112709	0.00558565	-0.853015	NC_009004.1	RefSeq	1266327	1266509	-	LLMG_RS06575;	LLMG_RS06575	n	n	transcript_id gene1318; gene_id gene1318; gene_name LLMG_RS06575; Dbxref Genbank:WP_014735028.1; Name WP_014735028.1; gbkey CDS; inference COORDINATES: ab initio prediction:GeneMarkS+; product hypothetical protein; transl_table 11; gbkey Gene; gene_biotype protein_coding; locus_tag LLMG_RS06575; protein_id WP_014735028.1;
llmg_2019	gene2019	-1.06903	8.62163	-4.85505	0.00114397	0.00565797	-1.36268	NC_009004.1	RefSeq	2004314	2005495	-	LLMG_RS10105;llmg_2019;	LLMG_RS10105	llm00250	Alanine, aspartate and glutamate metabolism	transcript_id gene2019; gene_id gene2019; gene_name LLMG_RS10105; Dbxref Genbank:WP_011835744.1; Name WP_011835744.1; gbkey CDS; inference COORDINATES: similar to AA sequence:RefSeq:NP_267987.1; product pyridoxal phosphate-dependent aminotransferase; transl_table 11; gbkey Gene; gene_biotype protein_coding; locus_tag LLMG_RS10105; old_locus_tag llmg_2019; protein_id WP_011835744.1;
llmg_0297	gene312	-0.795509	9.07407	-4.84544	0.0011584	0.00571784	-1.32423	NC_009004.1	RefSeq	286157	288298	+	LLMG_RS01555;llmg_0297;	LLMG_RS01555	n	n	transcript_id gene312; gene_id gene312; gene_name LLMG_RS01555; Dbxref Genbank:WP_011834366.1; Name WP_011834366.1; gbkey CDS; inference COORDINATES: similar to AA sequence:RefSeq:WP_011675337.1; product RNA-binding transcriptional accessory protein; transl_table 11; gbkey Gene; gene_biotype protein_coding; locus_tag LLMG_RS01555; old_locus_tag llmg_0297; protein_id WP_011834366.1;
llmg_1864	gene1864	-0.730687	8.87212	-4.84341	0.00116147	0.00571996	-1.32149	NC_009004.1	RefSeq	1844146	1845621	-	LLMG_RS09335;llmg_1864;	LLMG_RS09335	llm00190, llm02020	Oxidative phosphorylation , Two-component system	transcript_id gene1864; gene_id gene1864; gene_name LLMG_RS09335; Dbxref Genbank:WP_011835628.1; Name WP_011835628.1; gbkey CDS; inference COORDINATES: similar to AA sequence:RefSeq:NP_266860.1; product cytochrome ubiquinol oxidase subunit I; transl_table 11; gbkey Gene; gene_biotype protein_coding; locus_tag LLMG_RS09335; old_locus_tag llmg_1864; protein_id WP_011835628.1;
llmg_2268	gene2277	-0.686537	8.54979	-4.8421	0.00116346	0.00571996	-1.37889	NC_009004.1	RefSeq	2226384	2227565	+	LLMG_RS11385;llmg_2268;	LLMG_RS11385	n	n	transcript_id gene2277; gene_id gene2277; gene_name LLMG_RS11385; Dbxref Genbank:WP_011835954.1; Name WP_011835954.1; gbkey CDS; inference COORDINATES: similar to AA sequence:RefSeq:WP_011677065.1; product site-specific integrase; transl_table 11; gbkey Gene; gene_biotype protein_coding; locus_tag LLMG_RS11385; old_locus_tag llmg_2268; protein_id WP_011835954.1;
LLMG_RS01870	gene376	1.01941	7.11392	4.82884	0.00118379	0.00580833	-1.23597	NC_009004.1	RefSeq	352380	354017	+	LLMG_RS01870;pseudotrue;	LLMG_RS01870	n	n	transcript_id gene376; gene_id gene376; gene_name LLMG_RS01870; Note internal stop; gbkey CDS; inference COORDINATES: similar to AA sequence:RefSeq:NP_266500.1; product ABC transporter substrate-binding protein; pseudo true; transl_table 11; gbkey Gene; gene_biotype pseudogene; locus_tag LLMG_RS01870; pseudo true;
llmg_1834	gene1834	-0.912977	5.93416	-4.82266	0.00119341	0.00584392	-1.08321	NC_009004.1	RefSeq	1815577	1815987	+	LLMG_RS09185;llmg_1834;	LLMG_RS09185	n	n	transcript_id gene1834; gene_id gene1834; gene_name LLMG_RS09185; Dbxref Genbank:WP_011835604.1; Name WP_011835604.1; gbkey CDS; inference COORDINATES: similar to AA sequence:RefSeq:WP_003132441.1; product PaaI family thioesterase; transl_table 11; gbkey Gene; gene_biotype protein_coding; locus_tag LLMG_RS09185; old_locus_tag llmg_1834; protein_id WP_011835604.1;
llmg_0403	gene415	-0.91864	8.06399	-4.82016	0.00119732	0.00585146	-1.43146	NC_009004.1	RefSeq	399112	400179	-	LLMG_RS02065;llmg_0403;	LLMG_RS02065	n	n	transcript_id gene415; gene_id gene415; gene_name pepA; Dbxref Genbank:WP_011834455.1; Name WP_011834455.1; gbkey CDS; inference COORDINATES: similar to AA sequence:RefSeq:NP_266543.1; product glutamyl aminopeptidase; transl_table 11; Name pepA; gbkey Gene; gene_biotype protein_coding; locus_tag LLMG_RS02065; old_locus_tag llmg_0403; protein_id WP_011834455.1;
llmg_1130	gene1149	1.61886	5.05597	4.81098	0.00121179	0.00591046	-1.04223	NC_009004.1	RefSeq	1094974	1095348	+	LLMG_RS05740;llmg_1130;	LLMG_RS05740	n	n	transcript_id gene1149; gene_id gene1149; gene_name LLMG_RS05740; Dbxref Genbank:WP_011835035.1; Name WP_011835035.1; gbkey CDS; inference COORDINATES: similar to AA sequence:RefSeq:WP_011676319.1; product transcriptional regulator Spx; transl_table 11; gbkey Gene; gene_biotype protein_coding; locus_tag LLMG_RS05740; old_locus_tag llmg_1130; protein_id WP_011835035.1;
llmg_2467	gene2480	-0.817559	7.79367	-4.80571	0.00122019	0.00593972	-1.45065	NC_009004.1	RefSeq	2424123	2425538	-	LLMG_RS12395;llmg_2467;	LLMG_RS12395	n	n	transcript_id gene2480; gene_id gene2480; gene_name LLMG_RS12395; Dbxref Genbank:WP_011836099.1; Name WP_011836099.1; gbkey CDS; inference COORDINATES: similar to AA sequence:RefSeq:WP_011836099.1; product gluconate permease; transl_table 11; gbkey Gene; gene_biotype protein_coding; locus_tag LLMG_RS12395; old_locus_tag llmg_2467; protein_id WP_011836099.1;
llmg_0418	gene430	-0.845157	6.80807	-4.79854	0.00123171	0.00598398	-1.29138	NC_009004.1	RefSeq	411565	411891	+	LLMG_RS02140;llmg_0418;	LLMG_RS02140	n	n	transcript_id gene430; gene_id gene430; gene_name LLMG_RS02140; Dbxref Genbank:WP_011834465.1; Name WP_011834465.1; gbkey CDS; inference COORDINATES: similar to AA sequence:RefSeq:NP_266557.1; product DNA replication initiation control protein YabA; transl_table 11; gbkey Gene; gene_biotype protein_coding; locus_tag LLMG_RS02140; old_locus_tag llmg_0418; protein_id WP_011834465.1;
llmg_2455	gene2465	-0.845282	9.71814	-4.79666	0.00123475	0.00598696	-1.31883	NC_009004.1	RefSeq	2406273	2408915	-	LLMG_RS12325;llmg_2455;	LLMG_RS12325	llm00970	Aminoacyl-tRNA biosynthesis	transcript_id gene2465; gene_id gene2465; gene_name LLMG_RS12325; Dbxref Genbank:WP_011836089.1; Name WP_011836089.1; gbkey CDS; inference COORDINATES: similar to AA sequence:RefSeq:NP_268330.1; product valine--tRNA ligase; transl_table 11; gbkey Gene; gene_biotype protein_coding; locus_tag LLMG_RS12325; old_locus_tag llmg_2455; protein_id WP_011836089.1;
llmg_1409	gene1426	1.11732	5.44525	4.78983	0.00124588	0.00602909	-1.06725	NC_009004.1	RefSeq	1377548	1378417	-	LLMG_RS07115;llmg_1409;	LLMG_RS07115	n	n	transcript_id gene1426; gene_id gene1426; gene_name LLMG_RS07115; Dbxref Genbank:WP_011835269.1; Name WP_011835269.1; gbkey CDS; inference COORDINATES: similar to AA sequence:RefSeq:WP_011835269.1; product ParA family protein; transl_table 11; gbkey Gene; gene_biotype protein_coding; locus_tag LLMG_RS07115; old_locus_tag llmg_1409; protein_id WP_011835269.1;
llmg_1959	gene1959	0.749341	7.0144	4.78762	0.0012495	0.00603476	-1.34115	NC_009004.1	RefSeq	1940757	1941317	-	LLMG_RS09800;llmg_1959;	LLMG_RS09800	llm00440	Phosphonate and phosphinate metabolism	transcript_id gene1959; gene_id gene1959; gene_name LLMG_RS09800; Dbxref Genbank:WP_011835699.1; Name WP_011835699.1; gbkey CDS; inference COORDINATES: similar to AA sequence:RefSeq:WP_011676776.1; product N-acetyltransferase; transl_table 11; gbkey Gene; gene_biotype protein_coding; locus_tag LLMG_RS09800; old_locus_tag llmg_1959; protein_id WP_011835699.1;
llmg_1970	gene1972	-0.864323	7.53235	-4.77038	0.00127815	0.00616108	-1.46021	NC_009004.1	RefSeq	1951928	1952386	-	LLMG_RS09870;llmg_1970;	LLMG_RS09870	n	n	transcript_id gene1972; gene_id gene1972; gene_name LLMG_RS09870; Dbxref Genbank:WP_011676796.1; Name WP_011676796.1; gbkey CDS; inference COORDINATES: similar to AA sequence:RefSeq:NP_267946.2; product SUF system NifU family Fe-S cluster assembly protein; transl_table 11; gbkey Gene; gene_biotype protein_coding; locus_tag LLMG_RS09870; old_locus_tag llmg_1970; protein_id WP_011676796.1;
llmg_0376	gene388	0.706451	9.59027	4.76828	0.00128168	0.00616606	-1.39136	NC_009004.1	RefSeq	369088	370467	-	LLMG_RS01930;llmg_0376;	LLMG_RS01930	n	n	transcript_id gene388; gene_id gene388; gene_name LLMG_RS01930; Dbxref Genbank:WP_011834429.1; Name WP_011834429.1; gbkey CDS; inference COORDINATES: similar to AA sequence:RefSeq:NP_266512.1; product amino acid permease; transl_table 11; gbkey Gene; gene_biotype protein_coding; locus_tag LLMG_RS01930; old_locus_tag llmg_0376; protein_id WP_011834429.1;
llmg_1448	gene1465	0.684036	8.63497	4.75934	0.00129685	0.0062269	-1.47203	NC_009004.1	RefSeq	1414254	1417007	-	LLMG_RS07310;llmg_1448;	LLMG_RS07310	n	n	transcript_id gene1465; gene_id gene1465; gene_name LLMG_RS07310; Dbxref Genbank:WP_011835300.1; Name WP_011835300.1; gbkey CDS; inference COORDINATES: similar to AA sequence:RefSeq:NP_267273.1; product DUF2156 domain-containing protein; transl_table 11; gbkey Gene; gene_biotype protein_coding; locus_tag LLMG_RS07310; old_locus_tag llmg_1448; protein_id WP_011835300.1;
llmg_0832	gene859	-0.875658	6.94932	-4.75785	0.00129941	0.00622707	-1.38282	NC_009004.1	RefSeq	802098	802628	+	LLMG_RS04265;llmg_0832;	LLMG_RS04265	n	n	transcript_id gene859; gene_id gene859; gene_name LLMG_RS04265; Dbxref Genbank:WP_011834799.1; Name WP_011834799.1; gbkey CDS; inference COORDINATES: similar to AA sequence:RefSeq:WP_011834799.1; product hypothetical protein; transl_table 11; gbkey Gene; gene_biotype protein_coding; locus_tag LLMG_RS04265; old_locus_tag llmg_0832; protein_id WP_011834799.1;
llmg_1082	gene1102	0.988058	6.48166	4.74311	0.00132491	0.00633699	-1.30524	NC_009004.1	RefSeq	1039099	1039854	-	LLMG_RS05495;llmg_1082;	LLMG_RS05495	n	n	transcript_id gene1102; gene_id gene1102; gene_name LLMG_RS05495; Dbxref Genbank:WP_011834990.1; Name WP_011834990.1; gbkey CDS; inference COORDINATES: similar to AA sequence:RefSeq:WP_011676375.1; product pilus protein; transl_table 11; gbkey Gene; gene_biotype protein_coding; locus_tag LLMG_RS05495; old_locus_tag llmg_1082; protein_id WP_011834990.1;
llmg_0099	gene108	-2.7212	9.63691	-4.73838	0.00133322	0.00636439	-1.40334	NC_009004.1	RefSeq	92948	93121	-	LLMG_RS00535;llmg_0099;	LLMG_RS00535	llm03010	Ribosome	transcript_id gene108; gene_id gene108; gene_name rpmF; Dbxref Genbank:WP_010905107.1; Name WP_010905107.1; gbkey CDS; inference COORDINATES: similar to AA sequence:RefSeq:NP_266250.1; product 50S ribosomal protein L32; transl_table 11; Name rpmF; gbkey Gene; gene_biotype protein_coding; locus_tag LLMG_RS00535; old_locus_tag llmg_0099; protein_id WP_010905107.1;
llmg_1664	gene1672	-0.858259	6.49237	-4.73482	0.0013395	0.00638203	-1.36889	NC_009004.1	RefSeq	1639775	1640500	-	LLMG_RS08370;llmg_1664;	LLMG_RS08370	n	n	transcript_id gene1672; gene_id gene1672; gene_name LLMG_RS08370; Dbxref Genbank:WP_011675845.1; Name WP_011675845.1; gbkey CDS; inference COORDINATES: similar to AA sequence:RefSeq:WP_011675845.1; product nicotinamide mononucleotide transporter; transl_table 11; gbkey Gene; gene_biotype protein_coding; locus_tag LLMG_RS08370; old_locus_tag llmg_1664; protein_id WP_011675845.1;
llmg_0633	gene660	0.84498	9.79657	4.73235	0.00134388	0.00639057	-1.38869	NC_009004.1	RefSeq	623355	624617	+	LLMG_RS03305;llmg_0633;	LLMG_RS03305	n	n	transcript_id gene660; gene_id gene660; gene_name LLMG_RS03305; Dbxref Genbank:WP_011834642.1; Name WP_011834642.1; gbkey CDS; inference COORDINATES: similar to AA sequence:RefSeq:NP_266824.1; product FtsW/RodA/SpoVE family cell cycle protein; transl_table 11; gbkey Gene; gene_biotype protein_coding; locus_tag LLMG_RS03305; old_locus_tag llmg_0633; protein_id WP_011834642.1;
llmg_2423	gene2429	0.709933	7.604	4.7262	0.00135485	0.00643034	-1.5088	NC_009004.1	RefSeq	2365736	2366740	+	LLMG_RS12150;llmg_2423;	LLMG_RS12150	n	n	transcript_id gene2429; gene_id gene2429; gene_name LLMG_RS12150; Dbxref Genbank:WP_011836061.1; Name WP_011836061.1; gbkey CDS; inference COORDINATES: similar to AA sequence:RefSeq:WP_014573351.1; product hypothetical protein; transl_table 11; gbkey Gene; gene_biotype protein_coding; locus_tag LLMG_RS12150; old_locus_tag llmg_2423; protein_id WP_011836061.1;
llmg_1466	gene1483	-0.935218	8.52189	-4.72256	0.00136139	0.00644895	-1.56836	NC_009004.1	RefSeq	1440262	1441047	+	LLMG_RS07400;llmg_1466;	LLMG_RS07400	n	n	transcript_id gene1483; gene_id gene1483; gene_name LLMG_RS07400; Dbxref Genbank:WP_011835318.1; Name WP_011835318.1; gbkey CDS; inference COORDINATES: similar to AA sequence:RefSeq:NP_267261.1; product glutamine amidotransferase; transl_table 11; gbkey Gene; gene_biotype protein_coding; locus_tag LLMG_RS07400; old_locus_tag llmg_1466; protein_id WP_011835318.1;
llmg_1349	gene1369	-0.724847	8.7555	-4.71853	0.00136867	0.00647104	-1.54965	NC_009004.1	RefSeq	1322595	1323665	-	LLMG_RS06835;llmg_1349;	LLMG_RS06835	n	n	transcript_id gene1369; gene_id gene1369; gene_name LLMG_RS06835; Dbxref Genbank:WP_011835220.1; Name WP_011835220.1; gbkey CDS; inference COORDINATES: similar to AA sequence:RefSeq:WP_011835220.1; product DUF475 domain-containing protein; transl_table 11; gbkey Gene; gene_biotype protein_coding; locus_tag LLMG_RS06835; old_locus_tag llmg_1349; protein_id WP_011835220.1;
llmg_2393	gene2399	-0.707882	7.66405	-4.70986	0.00138448	0.00653325	-1.5772	NC_009004.1	RefSeq	2336296	2336931	-	LLMG_RS11995;llmg_2393;	LLMG_RS11995	n	n	transcript_id gene2399; gene_id gene2399; gene_name LLMG_RS11995; Dbxref Genbank:WP_011836034.1; Name WP_011836034.1; gbkey CDS; inference COORDINATES: similar to AA sequence:RefSeq:NP_268266.1; product DUF421 domain-containing protein; transl_table 11; gbkey Gene; gene_biotype protein_coding; locus_tag LLMG_RS11995; old_locus_tag llmg_2393; protein_id WP_011836034.1;
llmg_2018	gene2018	-1.11697	6.57575	-4.70181	0.00139932	0.0065907	-1.3503	NC_009004.1	RefSeq	2004010	2004321	-	LLMG_RS10100;llmg_2018;	LLMG_RS10100	n	n	transcript_id gene2018; gene_id gene2018; gene_name LLMG_RS10100; Dbxref Genbank:WP_011676844.1; Name WP_011676844.1; gbkey CDS; inference COORDINATES: similar to AA sequence:RefSeq:WP_011676844.1; product hypothetical protein; transl_table 11; gbkey Gene; gene_biotype protein_coding; locus_tag LLMG_RS10100; old_locus_tag llmg_2018; protein_id WP_011676844.1;
llmg_1463	gene1480	-0.85051	9.6241	-4.69836	0.00140574	0.00660831	-1.4546	NC_009004.1	RefSeq	1436035	1437858	-	LLMG_RS07385;llmg_1463;	LLMG_RS07385	n	n	transcript_id gene1480; gene_id gene1480; gene_name LLMG_RS07385; Dbxref Genbank:WP_011835315.1; Name WP_011835315.1; gbkey CDS; inference COORDINATES: similar to AA sequence:RefSeq:NP_267264.1; product elongation factor 4; transl_table 11; gbkey Gene; gene_biotype protein_coding; locus_tag LLMG_RS07385; old_locus_tag llmg_1463; protein_id WP_011835315.1;
llmg_1585	gene1597	0.778502	6.72954	4.6867	0.00142767	0.00669865	-1.45094	NC_009004.1	RefSeq	1559761	1560348	-	LLMG_RS07985;llmg_1585;	LLMG_RS07985	n	n	transcript_id gene1597; gene_id gene1597; gene_name LLMG_RS07985; Dbxref Genbank:WP_011835418.1; Name WP_011835418.1; gbkey CDS; inference COORDINATES: similar to AA sequence:RefSeq:NP_267099.1; product amidase; transl_table 11; gbkey Gene; gene_biotype protein_coding; locus_tag LLMG_RS07985; old_locus_tag llmg_1585; protein_id WP_011835418.1;
llmg_0424	gene435	-1.00938	8.17452	-4.68036	0.00143974	0.00672906	-1.62663	NC_009004.1	RefSeq	414996	415496	+	LLMG_RS02165;llmg_0424;	LLMG_RS02165	n	n	transcript_id gene435; gene_id gene435; gene_name LLMG_RS02165; Dbxref Genbank:WP_011834471.1; Name WP_011834471.1; gbkey CDS; inference COORDINATES: similar to AA sequence:RefSeq:WP_011675477.1; product MarR family transcriptional regulator; transl_table 11; gbkey Gene; gene_biotype protein_coding; locus_tag LLMG_RS02165; old_locus_tag llmg_0424; protein_id WP_011834471.1;
llmg_0995	gene1015	0.848504	8.39549	4.67894	0.00144246	0.00672906	-1.5931	NC_009004.1	RefSeq	960356	961048	+	LLMG_RS05060;llmg_0995;	LLMG_RS05060	n	n	transcript_id gene1015; gene_id gene1015; gene_name LLMG_RS05060; Dbxref Genbank:WP_011834928.1; Name WP_011834928.1; gbkey CDS; inference COORDINATES: similar to AA sequence:RefSeq:NP_267673.1; product noncanonical pyrimidine nucleotidase%2C YjjG family; transl_table 11; gbkey Gene; gene_biotype protein_coding; locus_tag LLMG_RS05060; old_locus_tag llmg_0995; protein_id WP_011834928.1;
llmg_1497	gene1513	-0.795831	7.4758	-4.67759	0.00144506	0.00672906	-1.58886	NC_009004.1	RefSeq	1468504	1469319	+	LLMG_RS07550;llmg_1497;	LLMG_RS07550	n	n	transcript_id gene1513; gene_id gene1513; gene_name LLMG_RS07550; Dbxref Genbank:WP_011835342.1; Name WP_011835342.1; gbkey CDS; inference COORDINATES: similar to AA sequence:RefSeq:WP_011835342.1; product Cof-type HAD-IIB family hydrolase; transl_table 11; gbkey Gene; gene_biotype protein_coding; locus_tag LLMG_RS07550; old_locus_tag llmg_1497; protein_id WP_011835342.1;
llmg_2148	gene2149	-0.801152	7.72214	-4.67984	0.00144073	0.00672906	-1.61355	NC_009004.1	RefSeq	2110523	2110987	-	LLMG_RS10750;llmg_2148;	LLMG_RS10750	n	n	transcript_id gene2149; gene_id gene2149; gene_name LLMG_RS10750; Dbxref Genbank:WP_011835852.1; Name WP_011835852.1; gbkey CDS; inference COORDINATES: similar to AA sequence:RefSeq:NP_268051.2; product VOC family protein; transl_table 11; gbkey Gene; gene_biotype protein_coding; locus_tag LLMG_RS10750; old_locus_tag llmg_2148; protein_id WP_011835852.1;
llmg_1586	gene1598	0.703595	8.78106	4.67283	0.00145423	0.00675901	-1.56818	NC_009004.1	RefSeq	1560360	1562819	-	LLMG_RS07990;llmg_1586;	LLMG_RS07990	llm03018	RNA degradation	transcript_id gene1598; gene_id gene1598; gene_name rnr; Dbxref Genbank:WP_011835419.1; Name WP_011835419.1; gbkey CDS; inference COORDINATES: similar to AA sequence:RefSeq:NP_267098.1; product ribonuclease R; transl_table 11; Name rnr; gbkey Gene; gene_biotype protein_coding; locus_tag LLMG_RS07990; old_locus_tag llmg_1586; protein_id WP_011835419.1;
llmg_0090	gene99	1.10214	5.7806	4.66744	0.00146469	0.00678433	-1.31795	NC_009004.1	RefSeq	85894	86376	-	LLMG_RS00490;llmg_0090;	LLMG_RS00490	n	n	transcript_id gene99; gene_id gene99; gene_name LLMG_RS00490; Dbxref Genbank:WP_011834193.1; Name WP_011834193.1; gbkey CDS; inference COORDINATES: similar to AA sequence:RefSeq:WP_011675133.1; product hypothetical protein; transl_table 11; gbkey Gene; gene_biotype protein_coding; locus_tag LLMG_RS00490; old_locus_tag llmg_0090; protein_id WP_011834193.1;
llmg_1993	gene1995	-0.890894	7.97935	-4.6672	0.00146517	0.00678433	-1.64966	NC_009004.1	RefSeq	1981100	1982623	-	LLMG_RS09985;llmg_1993;	LLMG_RS09985	n	n	transcript_id gene1995; gene_id gene1995; gene_name LLMG_RS09985; Dbxref Genbank:WP_011835726.1; Name WP_011835726.1; gbkey CDS; inference COORDINATES: similar to AA sequence:RefSeq:WP_011835726.1; product glutamate/gamma-aminobutyrate family transporter YjeM; transl_table 11; gbkey Gene; gene_biotype protein_coding; locus_tag LLMG_RS09985; old_locus_tag llmg_1993; protein_id WP_011835726.1;
llmg_1352	gene1372	-0.840204	9.6456	-4.64241	0.00151438	0.00699905	-1.54035	NC_009004.1	RefSeq	1324928	1325551	-	LLMG_RS06850;llmg_1352;	LLMG_RS06850	n	n	transcript_id gene1372; gene_id gene1372; gene_name LLMG_RS06850; Dbxref Genbank:WP_011835223.1; Name WP_011835223.1; gbkey CDS; inference COORDINATES: similar to AA sequence:RefSeq:WP_011835223.1; product TerD family protein; transl_table 11; gbkey Gene; gene_biotype protein_coding; locus_tag LLMG_RS06850; old_locus_tag llmg_1352; protein_id WP_011835223.1;
llmg_0494	gene505	-0.748047	8.701	-4.63735	0.00152464	0.00703331	-1.6407	NC_009004.1	RefSeq	488285	489505	+	LLMG_RS02515;llmg_0494;	LLMG_RS02515	llm00520	Amino sugar and nucleotide sugar metabolism	transcript_id gene505; gene_id gene505; gene_name LLMG_RS02515; Dbxref Genbank:WP_011834534.1; Name WP_011834534.1; gbkey CDS; inference COORDINATES: similar to AA sequence:RefSeq:NP_266656.1; product glycoside hydrolase family 3 protein; transl_table 11; gbkey Gene; gene_biotype protein_coding; locus_tag LLMG_RS02515; old_locus_tag llmg_0494; protein_id WP_011834534.1;
llmg_0290	gene304	-0.919128	7.73552	-4.63046	0.00153874	0.00708078	-1.64919	NC_009004.1	RefSeq	278772	279383	+	LLMG_RS01515;llmg_0290;	LLMG_RS01515	n	n	transcript_id gene304; gene_id gene304; gene_name LLMG_RS01515; Dbxref Genbank:WP_011834360.1; Name WP_011834360.1; gbkey CDS; inference COORDINATES: similar to AA sequence:RefSeq:NP_266436.1; product thiol-disulfide isomerase; transl_table 11; gbkey Gene; gene_biotype protein_coding; locus_tag LLMG_RS01515; old_locus_tag llmg_0290; protein_id WP_011834360.1;
llmg_2272	gene2281	0.745269	9.67659	4.62953	0.00154067	0.00708078	-1.55473	NC_009004.1	RefSeq	2230238	2232016	-	LLMG_RS11405;llmg_2272;	LLMG_RS11405	llm00564	Glycerophospholipid metabolism	transcript_id gene2281; gene_id gene2281; gene_name LLMG_RS11405; Dbxref Genbank:WP_011835958.1; Name WP_011835958.1; gbkey CDS; inference COORDINATES: similar to AA sequence:RefSeq:WP_011677069.1; product glycerophosphoryl diester phosphodiesterase; transl_table 11; gbkey Gene; gene_biotype protein_coding; locus_tag LLMG_RS11405; old_locus_tag llmg_2272; protein_id WP_011835958.1;
llmg_0615	gene642	-1.14326	10.4474	-4.61435	0.00157227	0.0071992	-1.44781	NC_009004.1	RefSeq	602854	605304	+	LLMG_RS03205;llmg_0615;	LLMG_RS03205	n	n	transcript_id gene642; gene_id gene642; gene_name LLMG_RS03205; Dbxref Genbank:WP_011834628.1; Name WP_011834628.1; gbkey CDS; inference COORDINATES: similar to AA sequence:RefSeq:NP_266798.1; product ATP-dependent Clp protease ATP-binding subunit; transl_table 11; gbkey Gene; gene_biotype protein_coding; locus_tag LLMG_RS03205; old_locus_tag llmg_0615; protein_id WP_011834628.1;
llmg_1137	gene1156	-1.33464	7.57218	-4.61565	0.00156954	0.0071992	-1.65111	NC_009004.1	RefSeq	1102926	1103765	+	LLMG_RS05775;llmg_1137;	LLMG_RS05775	llm02010	ABC transporters	transcript_id gene1156; gene_id gene1156; gene_name LLMG_RS05775; Dbxref Genbank:WP_011835042.1; Name WP_011835042.1; gbkey CDS; inference COORDINATES: similar to AA sequence:RefSeq:NP_267473.1; product metal ABC transporter permease; transl_table 11; gbkey Gene; gene_biotype protein_coding; locus_tag LLMG_RS05775; old_locus_tag llmg_1137; protein_id WP_011835042.1;
LLMG_RS05875	gene1176	-0.791522	7.953	-4.6104	0.0015806	0.00722393	-1.73451	NC_009004.1	RefSeq	1124929	1125452	-	LLMG_RS05875;pseudotrue;	LLMG_RS05875	n	n	transcript_id gene1176; gene_id gene1176; gene_name LLMG_RS05875; Note frameshifted; gbkey CDS; inference COORDINATES: similar to AA sequence:RefSeq:WP_003609955.1; product hypothetical protein; pseudo true; transl_table 11; gbkey Gene; gene_biotype pseudogene; locus_tag LLMG_RS05875; pseudo true;
llmg_1270	gene1291	0.680176	7.58389	4.60244	0.00159756	0.00728795	-1.70819	NC_009004.1	RefSeq	1238314	1239384	+	LLMG_RS06440;llmg_1270;	LLMG_RS06440	n	n	transcript_id gene1291; gene_id gene1291; gene_name LLMG_RS06440; Dbxref Genbank:WP_011835149.1; Name WP_011835149.1; gbkey CDS; inference COORDINATES: similar to AA sequence:RefSeq:NP_267388.1; product tyrosine recombinase XerS; transl_table 11; gbkey Gene; gene_biotype protein_coding; locus_tag LLMG_RS06440; old_locus_tag llmg_1270; protein_id WP_011835149.1;
llmg_0349	gene362	-1.11901	8.55899	-4.59995	0.00160289	0.00729878	-1.73158	NC_009004.1	RefSeq	336295	337236	+	LLMG_RS01800;llmg_0349;	LLMG_RS01800	llm02010	ABC transporters	transcript_id gene362; gene_id gene362; gene_name LLMG_RS01800; Dbxref Genbank:WP_011834409.1; Name WP_011834409.1; gbkey CDS; inference COORDINATES: similar to AA sequence:RefSeq:NP_266486.1; product ferrichrome ABC transporter substrate-binding protein; transl_table 11; gbkey Gene; gene_biotype protein_coding; locus_tag LLMG_RS01800; old_locus_tag llmg_0349; protein_id WP_011834409.1;
llmg_0790	gene821	1.14643	7.5516	4.58466	0.00163614	0.00743643	-1.67609	NC_009004.1	RefSeq	779032	780165	-	LLMG_RS04075;llmg_0790;	LLMG_RS04075	n	n	transcript_id gene821; gene_id gene821; gene_name LLMG_RS04075; Dbxref Genbank:WP_011834768.1; Name WP_011834768.1; gbkey CDS; inference COORDINATES: similar to AA sequence:RefSeq:WP_011834768.1; product site-specific integrase; transl_table 11; gbkey Gene; gene_biotype protein_coding; locus_tag LLMG_RS04075; old_locus_tag llmg_0790; protein_id WP_011834768.1;
llmg_0288	gene302	-0.852762	7.71977	-4.58319	0.00163935	0.00743737	-1.73589	NC_009004.1	RefSeq	277084	277950	+	LLMG_RS01505;llmg_0288;	LLMG_RS01505	llm02010	ABC transporters	transcript_id gene302; gene_id gene302; gene_name LLMG_RS01505; Dbxref Genbank:WP_011834359.1; Name WP_011834359.1; Note with CbiNQ forms the ABC transporter for cobalt import%3B Bacillus spp. have two adjacent copies of this gene; gbkey CDS; inference COORDINATES: similar to AA sequence:RefSeq:NP_266434.1; product energy-coupling factor transporter ATPase; transl_table 11; gbkey Gene; gene_bioty…
llmg_0730	gene760	-0.867238	7.12152	-4.57033	0.00166795	0.00755319	-1.66649	NC_009004.1	RefSeq	712688	712891	-	LLMG_RS03770;llmg_0730;	LLMG_RS03770	n	n	transcript_id gene760; gene_id gene760; gene_name LLMG_RS03770; Dbxref Genbank:WP_011676698.1; Name WP_011676698.1; gbkey CDS; inference COORDINATES: similar to AA sequence:RefSeq:NP_267861.1; product ferredoxin; transl_table 11; gbkey Gene; gene_biotype protein_coding; locus_tag LLMG_RS03770; old_locus_tag llmg_0730; protein_id WP_011676698.1;
llmg_2280	gene2289	1.08702	6.3725	4.55108	0.00171177	0.00773743	-1.50327	NC_009004.1	RefSeq	2236729	2236938	-	LLMG_RS11445;llmg_2280;	LLMG_RS11445	n	n	transcript_id gene2289; gene_id gene2289; gene_name LLMG_RS11445; Dbxref Genbank:WP_011677077.1; Name WP_011677077.1; gbkey CDS; inference COORDINATES: similar to AA sequence:RefSeq:NP_268162.1; product hypothetical protein; transl_table 11; gbkey Gene; gene_biotype protein_coding; locus_tag LLMG_RS11445; old_locus_tag llmg_2280; protein_id WP_011677077.1;
llmg_1191	gene1208	-0.913679	7.63072	-4.5482	0.00171842	0.00775333	-1.7974	NC_009004.1	RefSeq	1161573	1162289	+	LLMG_RS06030;llmg_1191;	LLMG_RS06030	n	n	transcript_id gene1208; gene_id gene1208; gene_name LLMG_RS06030; Dbxref Genbank:WP_011835090.1; Name WP_011835090.1; gbkey CDS; inference COORDINATES: similar to AA sequence:RefSeq:NP_267434.2; product XerD-like tyrosine recombinase; transl_table 11; gbkey Gene; gene_biotype protein_coding; locus_tag LLMG_RS06030; old_locus_tag llmg_1191; protein_id WP_011835090.1;
llmg_1867	gene1867	1.17413	4.52217	4.54656	0.00172223	0.0077563	-1.31599	NC_009004.1	RefSeq	1848710	1848859	-	LLMG_RS13250;llmg_1867;	LLMG_RS13250	n	n	transcript_id gene1867; gene_id gene1867; gene_name LLMG_RS13250; Dbxref Genbank:WP_011835631.1; Name WP_011835631.1; gbkey CDS; inference COORDINATES: similar to AA sequence:RefSeq:WP_011675662.1; product bacteriocin; transl_table 11; gbkey Gene; gene_biotype protein_coding; locus_tag LLMG_RS13250; old_locus_tag llmg_1867; protein_id WP_011835631.1;
llmg_1331	gene1351	0.769842	7.34506	4.54051	0.00173633	0.00780559	-1.70625	NC_009004.1	RefSeq	1307334	1308224	-	LLMG_RS06745;llmg_1331;	LLMG_RS06745	llm00260	Glycine, serine and threonine metabolism	transcript_id gene1351; gene_id gene1351; gene_name LLMG_RS06745; Dbxref Genbank:WP_011835204.1; Name WP_011835204.1; gbkey CDS; inference COORDINATES: similar to AA sequence:RefSeq:WP_011835204.1; product homoserine kinase; transl_table 11; gbkey Gene; gene_biotype protein_coding; locus_tag LLMG_RS06745; old_locus_tag llmg_1331; protein_id WP_011835204.1;
llmg_0021	gene18	-0.953601	11.4196	-4.53096	0.00175887	0.00789252	-1.49948	NC_009004.1	RefSeq	23340	25427	+	LLMG_RS00095;llmg_0021;	LLMG_RS00095	n	n	transcript_id gene18; gene_id gene18; gene_name LLMG_RS00095; Dbxref Genbank:WP_011834133.1; Name WP_011834133.1; gbkey CDS; inference COORDINATES: similar to AA sequence:RefSeq:WP_011834133.1; product ATP-dependent metallopeptidase FtsH/Yme1/Tma family protein; transl_table 11; gbkey Gene; gene_biotype protein_coding; locus_tag LLMG_RS00095; old_locus_tag llmg_0021; protein_id WP_011834133.1;
llmg_1994	gene1996	-0.986134	10.0818	-4.52599	0.00177073	0.00793131	-1.65865	NC_009004.1	RefSeq	1982905	1984146	-	LLMG_RS09990;llmg_1994;	LLMG_RS09990	n	n	transcript_id gene1996; gene_id gene1996; gene_name pepT; Dbxref Genbank:WP_011676821.1; Name WP_011676821.1; gbkey CDS; inference COORDINATES: similar to AA sequence:RefSeq:NP_267967.1; product peptidase T; transl_table 11; Name pepT; gbkey Gene; gene_biotype protein_coding; locus_tag LLMG_RS09990; old_locus_tag llmg_1994; protein_id WP_011676821.1;
llmg_0308	gene321	-0.920106	6.88539	-4.5209	0.00178295	0.0079572	-1.70366	NC_009004.1	RefSeq	294909	295379	+	LLMG_RS01600;llmg_0308;	LLMG_RS01600	n	n	transcript_id gene321; gene_id gene321; gene_name rimI; Dbxref Genbank:WP_011834373.1; Name WP_011834373.1; gbkey CDS; inference COORDINATES: similar to AA sequence:RefSeq:WP_011834373.1; product ribosomal-protein-alanine N-acetyltransferase; transl_table 11; Name rimI; gbkey Gene; gene_biotype protein_coding; locus_tag LLMG_RS01600; old_locus_tag llmg_0308; protein_id WP_011834373.1;
llmg_1334	gene1354	-0.641391	8.18733	-4.52097	0.00178278	0.0079572	-1.86787	NC_009004.1	RefSeq	1310463	1311746	-	LLMG_RS06760;llmg_1334;	LLMG_RS06760	llm00790	Folate biosynthesis	transcript_id gene1354; gene_id gene1354; gene_name LLMG_RS06760; Dbxref Genbank:WP_011835207.1; Name WP_011835207.1; gbkey CDS; inference COORDINATES: similar to AA sequence:RefSeq:NP_267313.1; product bifunctional folylpolyglutamate synthase/dihydrofolate synthase; transl_table 11; gbkey Gene; gene_biotype protein_coding; locus_tag LLMG_RS06760; old_locus_tag llmg_1334; protein_id WP_011835207.…
llmg_1415	gene1432	-1.23443	8.57973	-4.51882	0.00178799	0.00796526	-1.82074	NC_009004.1	RefSeq	1383432	1384163	-	LLMG_RS07145;llmg_1415;	LLMG_RS07145	llm00061	Fatty acid biosynthesis	transcript_id gene1432; gene_id gene1432; gene_name LLMG_RS07145; Dbxref Genbank:WP_011835275.1; Name WP_011835275.1; gbkey CDS; inference COORDINATES: similar to AA sequence:RefSeq:WP_011835275.1; product acyl-ACP thioesterase; transl_table 11; gbkey Gene; gene_biotype protein_coding; locus_tag LLMG_RS07145; old_locus_tag llmg_1415; protein_id WP_011835275.1;
llmg_0592	gene616	-0.981615	7.69493	-4.50931	0.00181113	0.00805382	-1.85839	NC_009004.1	RefSeq	581460	582128	+	LLMG_RS03070;llmg_0592;	LLMG_RS03070	n	n	transcript_id gene616; gene_id gene616; gene_name LLMG_RS03070; Dbxref Genbank:WP_011834609.1; Name WP_011834609.1; gbkey CDS; inference COORDINATES: similar to AA sequence:RefSeq:NP_266783.1; product hypothetical protein; transl_table 11; gbkey Gene; gene_biotype protein_coding; locus_tag LLMG_RS03070; old_locus_tag llmg_0592; protein_id WP_011834609.1;
llmg_0311	gene325	-1.05044	8.09888	-4.50629	0.00181855	0.00805779	-1.8785	NC_009004.1	RefSeq	296970	297761	-	LLMG_RS01615;llmg_0311;	LLMG_RS01615	n	n	transcript_id gene325; gene_id gene325; gene_name LLMG_RS01615; Dbxref Genbank:WP_011675351.1; Name WP_011675351.1; gbkey CDS; inference COORDINATES: similar to AA sequence:RefSeq:WP_011675351.1; product hypothetical protein; transl_table 11; gbkey Gene; gene_biotype protein_coding; locus_tag LLMG_RS01615; old_locus_tag llmg_0311; protein_id WP_011675351.1;
LLMG_RS03050	gene611	0.610353	8.62414	4.50716	0.00181643	0.00805779	-1.84641	NC_009004.1	RefSeq	574965	576986	+	LLMG_RS03050;pseudotrue;	LLMG_RS03050	n	n	transcript_id gene611; gene_id gene611; gene_name LLMG_RS03050; Note internal stop; gbkey CDS; inference COORDINATES: similar to AA sequence:RefSeq:WP_011675762.1; product potassium transporter Kup; pseudo true; transl_table 11; gbkey Gene; gene_biotype pseudogene; locus_tag LLMG_RS03050; pseudo true;
llmg_0355	gene368	-1.17994	10.8868	-4.50394	0.00182438	0.00806911	-1.59609	NC_009004.1	RefSeq	341375	342076	+	LLMG_RS01830;llmg_0355;	LLMG_RS01830	llm00010, llm00260, llm00680	Glycolysis / Gluconeogenesis , Glycine, serine and threonine metabolism , Methane metabolism	transcript_id gene368; gene_id gene368; gene_name LLMG_RS01830; Dbxref Genbank:WP_011675395.1; Name WP_011675395.1; gbkey CDS; inference COORDINATES: similar to AA sequence:RefSeq:NP_266492.1; product 2%2C3-bisphosphoglycerate-dependent phosphoglycerate mutase; transl_table 11; gbkey Gene; gene_biotype protein_coding; locus_tag LLMG_RS01830; old_locus_tag llmg_0355; protein_id WP_011675395.1;
llmg_0012	gene10	-0.782747	6.91111	-4.49785	0.00183948	0.00812135	-1.73475	NC_009004.1	RefSeq	14436	15002	+	LLMG_RS00055;llmg_0012;	LLMG_RS00055	n	n	transcript_id gene10; gene_id gene10; gene_name LLMG_RS00055; Dbxref Genbank:WP_003132167.1; Name WP_003132167.1; gbkey CDS; inference COORDINATES: similar to AA sequence:RefSeq:NP_266168.1; product peptidyl-tRNA hydrolase; transl_table 11; gbkey Gene; gene_biotype protein_coding; locus_tag LLMG_RS00055; old_locus_tag llmg_0012; protein_id WP_003132167.1;
llmg_1905	gene1904	0.886037	6.20743	4.48404	0.00187429	0.00826026	-1.61017	NC_009004.1	RefSeq	1882378	1882959	-	LLMG_RS09535;llmg_1905;	LLMG_RS09535	n	n	transcript_id gene1904; gene_id gene1904; gene_name LLMG_RS09535; Dbxref Genbank:WP_075070468.1; Name WP_075070468.1; gbkey CDS; inference COORDINATES: similar to AA sequence:RefSeq:NP_267879.1; product esterase; transl_table 11; gbkey Gene; gene_biotype protein_coding; locus_tag LLMG_RS09535; old_locus_tag llmg_1905; protein_id WP_075070468.1;
llmg_0176	gene189	-0.841577	9.75976	-4.48091	0.00188226	0.00828058	-1.7758	NC_009004.1	RefSeq	166313	167746	+	LLMG_RS00940;llmg_0176;	LLMG_RS00940	llm00970	Aminoacyl-tRNA biosynthesis	transcript_id gene189; gene_id gene189; gene_name LLMG_RS00940; Dbxref Genbank:WP_011834266.1; Name WP_011834266.1; gbkey CDS; inference COORDINATES: similar to AA sequence:RefSeq:NP_266321.2; product Asp-tRNA(Asn)/Glu-tRNA(Gln) amidotransferase GatCAB subunit B; transl_table 11; gbkey Gene; gene_biotype protein_coding; locus_tag LLMG_RS00940; old_locus_tag llmg_0176; protein_id WP_011834266.1;
llmg_0518	gene529	-0.883953	6.0326	-4.47248	0.00190396	0.00836117	-1.58796	NC_009004.1	RefSeq	509368	509559	+	LLMG_RS02635;llmg_0518;	LLMG_RS02635	n	n	transcript_id gene529; gene_id gene529; gene_name LLMG_RS02635; Dbxref Genbank:WP_011675560.1; Name WP_011675560.1; gbkey CDS; inference COORDINATES: similar to AA sequence:RefSeq:NP_266706.1; product DNA-directed RNA polymerase subunit beta; transl_table 11; gbkey Gene; gene_biotype protein_coding; locus_tag LLMG_RS02635; old_locus_tag llmg_0518; protein_id WP_011675560.1;
llmg_2037	gene2035	-1.05651	8.83129	-4.47074	0.00190846	0.00836603	-1.87169	NC_009004.1	RefSeq	2021695	2022063	-	LLMG_RS10185;llmg_2037;	LLMG_RS10185	n	n	transcript_id gene2035; gene_id gene2035; gene_name LLMG_RS10185; Dbxref Genbank:WP_011835756.1; Name WP_011835756.1; gbkey CDS; inference COORDINATES: similar to AA sequence:RefSeq:NP_268006.1; product DUF1033 domain-containing protein; transl_table 11; gbkey Gene; gene_biotype protein_coding; locus_tag LLMG_RS10185; old_locus_tag llmg_2037; protein_id WP_011835756.1;
llmg_0051	gene60	-0.95985	5.47108	-4.45723	0.00194387	0.00850616	-1.54752	NC_009004.1	RefSeq	48562	48888	+	LLMG_RS00295;llmg_0051;	LLMG_RS00295	n	n	transcript_id gene60; gene_id gene60; gene_name LLMG_RS00295; Dbxref Genbank:WP_011834160.1; Name WP_011834160.1; gbkey CDS; inference COORDINATES: similar to AA sequence:RefSeq:WP_011834160.1; product hypothetical protein; transl_table 11; gbkey Gene; gene_biotype protein_coding; locus_tag LLMG_RS00295; old_locus_tag llmg_0051; protein_id WP_011834160.1;
llmg_0070	gene78	1.56166	7.83199	4.45142	0.00195934	0.00855096	-1.8637	NC_009004.1	RefSeq	64007	65242	+	LLMG_RS00385;llmg_0070;	LLMG_RS00385	n	n	transcript_id gene78; gene_id gene78; gene_name LLMG_RS00385; Dbxref Genbank:WP_011834173.1; Name WP_011834173.1; gbkey CDS; inference COORDINATES: similar to AA sequence:RefSeq:WP_003132221.1; product MFS transporter; transl_table 11; gbkey Gene; gene_biotype protein_coding; locus_tag LLMG_RS00385; old_locus_tag llmg_0070; protein_id WP_011834173.1;
llmg_0585	gene609	-1.09079	9.21919	-4.44948	0.0019645	0.00855096	-1.84222	NC_009004.1	RefSeq	572671	573231	+	LLMG_RS03040;llmg_0585;	LLMG_RS03040	n	n	transcript_id gene609; gene_id gene609; gene_name LLMG_RS03040; Dbxref Genbank:WP_011834605.1; Name WP_011834605.1; gbkey CDS; inference COORDINATES: similar to AA sequence:RefSeq:NP_266777.1; product YtxH domain-containing protein; transl_table 11; gbkey Gene; gene_biotype protein_coding; locus_tag LLMG_RS03040; old_locus_tag llmg_0585; protein_id WP_011834605.1;
llmg_1863	gene1863	-0.901459	9.40717	-4.44978	0.00196372	0.00855096	-1.81767	NC_009004.1	RefSeq	1843151	1844146	-	LLMG_RS09330;llmg_1863;	LLMG_RS09330	llm00190, llm02020	Oxidative phosphorylation , Two-component system	transcript_id gene1863; gene_id gene1863; gene_name cydB; Dbxref Genbank:WP_011835627.1; Name WP_011835627.1; gbkey CDS; inference COORDINATES: similar to AA sequence:RefSeq:NP_266861.1; product cytochrome d ubiquinol oxidase subunit II; transl_table 11; Name cydB; gbkey Gene; gene_biotype protein_coding; locus_tag LLMG_RS09330; old_locus_tag llmg_1863; protein_id WP_011835627.1;
llmg_2004	gene2004	1.38296	8.74194	4.44633	0.00197297	0.00856414	-1.87711	NC_009004.1	RefSeq	1991280	1991732	+	LLMG_RS10030;llmg_2004;	LLMG_RS10030	n	n	transcript_id gene2004; gene_id gene2004; gene_name LLMG_RS10030; Dbxref Genbank:WP_011835732.1; Name WP_011835732.1; gbkey CDS; inference COORDINATES: similar to AA sequence:RefSeq:WP_011835732.1; product N-acetyltransferase; transl_table 11; gbkey Gene; gene_biotype protein_coding; locus_tag LLMG_RS10030; old_locus_tag llmg_2004; protein_id WP_011835732.1;
LLMG_RS06515	gene1306	1.45388	6.34627	4.44577	0.00197447	0.00856414	-1.68573	NC_009004.1	RefSeq	1255397	1256435	-	LLMG_RS06515;pseudotrue;	LLMG_RS06515	n	n	transcript_id gene1306; gene_id gene1306; gene_name leuB; Note frameshifted; gbkey CDS; inference COORDINATES: similar to AA sequence:RefSeq:WP_017864489.1; product 3-isopropylmalate dehydrogenase; pseudo true; transl_table 11; Name leuB; gbkey Gene; gene_biotype pseudogene; locus_tag LLMG_RS06515; pseudo true;
llmg_0673	gene704	1.26776	6.89212	4.4426	0.00198304	0.0085862	-1.77669	NC_009004.1	RefSeq	666946	667563	-	LLMG_RS03500;llmg_0673;	LLMG_RS03500	n	n	transcript_id gene704; gene_id gene704; gene_name LLMG_RS03500; Dbxref Genbank:WP_011834674.1; Name WP_011834674.1; gbkey CDS; inference COORDINATES: similar to AA sequence:RefSeq:WP_011834674.1; product hypothetical protein; transl_table 11; gbkey Gene; gene_biotype protein_coding; locus_tag LLMG_RS03500; old_locus_tag llmg_0673; protein_id WP_011834674.1;
llmg_0609	gene636	-1.11634	9.94925	-4.4383	0.0019947	0.00862157	-1.80099	NC_009004.1	RefSeq	597320	598960	+	LLMG_RS03170;llmg_0609;	LLMG_RS03170	n	n	transcript_id gene636; gene_id gene636; gene_name LLMG_RS03170; Dbxref Genbank:WP_041931175.1; Name WP_041931175.1; gbkey CDS; inference COORDINATES: similar to AA sequence:RefSeq:WP_011675776.1; product endolytic transglycosylase MltG; transl_table 11; gbkey Gene; gene_biotype protein_coding; locus_tag LLMG_RS03170; old_locus_tag llmg_0609; protein_id WP_041931175.1;
llmg_1062	gene1081	-0.936781	8.00255	-4.42471	0.00203206	0.00876771	-1.99807	NC_009004.1	RefSeq	1022381	1023043	+	LLMG_RS05390;llmg_1062;	LLMG_RS05390	llm00030	Pentose phosphate pathway	transcript_id gene1081; gene_id gene1081; gene_name deoC; Dbxref Genbank:WP_011676396.1; Name WP_011676396.1; gbkey CDS; inference COORDINATES: similar to AA sequence:RefSeq:NP_267596.1; product 2-deoxyribose-5-phosphate aldolase; transl_table 11; Name deoC; gbkey Gene; gene_biotype protein_coding; locus_tag LLMG_RS05390; old_locus_tag llmg_1062; protein_id WP_011676396.1;
llmg_0136	gene147	0.740022	6.93801	4.41933	0.00204705	0.00881697	-1.83891	NC_009004.1	RefSeq	131117	131638	+	LLMG_RS00735;llmg_0136;	LLMG_RS00735	n	n	transcript_id gene147; gene_id gene147; gene_name LLMG_RS00735; Dbxref Genbank:WP_011834233.1; Name WP_011834233.1; gbkey CDS; inference COORDINATES: similar to AA sequence:RefSeq:WP_011834233.1; product sensor histidine kinase; transl_table 11; gbkey Gene; gene_biotype protein_coding; locus_tag LLMG_RS00735; old_locus_tag llmg_0136; protein_id WP_011834233.1;
llmg_0870	gene896	-0.969761	8.9703	-4.41618	0.0020559	0.00883964	-1.92557	NC_009004.1	RefSeq	840113	840976	+	LLMG_RS04450;llmg_0870;	LLMG_RS04450	n	n	transcript_id gene896; gene_id gene896; gene_name LLMG_RS04450; Dbxref Genbank:WP_011834832.1; Name WP_011834832.1; gbkey CDS; inference COORDINATES: similar to AA sequence:RefSeq:NP_267779.1; product aquaporin family protein; transl_table 11; gbkey Gene; gene_biotype protein_coding; locus_tag LLMG_RS04450; old_locus_tag llmg_0870; protein_id WP_011834832.1;
llmg_1647	gene1657	-0.996154	9.43851	-4.40974	0.00207409	0.00890237	-1.89356	NC_009004.1	RefSeq	1624680	1625486	-	LLMG_RS08290;llmg_1647;	LLMG_RS08290	n	n	transcript_id gene1657; gene_id gene1657; gene_name LLMG_RS08290; Dbxref Genbank:WP_011835467.1; Name WP_011835467.1; gbkey CDS; inference COORDINATES: similar to AA sequence:RefSeq:NP_267048.1; product Cof-type HAD-IIB family hydrolase; transl_table 11; gbkey Gene; gene_biotype protein_coding; locus_tag LLMG_RS08290; old_locus_tag llmg_1647; protein_id WP_011835467.1;
llmg_1638	gene1649	0.776366	7.37085	4.40388	0.0020908	0.0089585	-1.9324	NC_009004.1	RefSeq	1615293	1616915	-	LLMG_RS08250;llmg_1638;	LLMG_RS08250	llm00620	Pyruvate metabolism	transcript_id gene1649; gene_id gene1649; gene_name LLMG_RS08250; Dbxref Genbank:WP_011835459.1; Name WP_011835459.1; Note malic enzyme%3B oxaloacetate-decarboxylating%3B NAD-dependent%3B catalyzes the formation of pyruvate form malate; gbkey CDS; inference COORDINATES: similar to AA sequence:RefSeq:NP_267056.1; product NAD-dependent malic enzyme; transl_table 11; gbkey Gene; gene_biotype protein…
llmg_0193	gene205	-0.989507	8.49457	-4.40259	0.00209452	0.00895887	-1.99933	NC_009004.1	RefSeq	181659	182426	+	LLMG_RS01020;llmg_0193;	LLMG_RS01020	n	n	transcript_id gene205; gene_id gene205; gene_name LLMG_RS01020; Dbxref Genbank:WP_011834279.1; Name WP_011834279.1; gbkey CDS; inference COORDINATES: similar to AA sequence:RefSeq:NP_266334.1; product DUF1027 domain-containing protein; transl_table 11; gbkey Gene; gene_biotype protein_coding; locus_tag LLMG_RS01020; old_locus_tag llmg_0193; protein_id WP_011834279.1;
llmg_0934	gene959	0.652475	8.30425	4.3831	0.00215126	0.00918565	-2.03315	NC_009004.1	RefSeq	903241	904197	+	LLMG_RS04765;llmg_0934;	LLMG_RS04765	llm00860	Porphyrin and chlorophyll metabolism	transcript_id gene959; gene_id gene959; gene_name LLMG_RS04765; Dbxref Genbank:WP_011834879.1; Name WP_011834879.1; gbkey CDS; inference COORDINATES: similar to AA sequence:RefSeq:WP_015082632.1; product ferrochelatase; transl_table 11; gbkey Gene; gene_biotype protein_coding; locus_tag LLMG_RS04765; old_locus_tag llmg_0934; protein_id WP_011834879.1;
llmg_1274	gene1295	-1.00214	8.00211	-4.37996	0.00216055	0.00920941	-2.06441	NC_009004.1	RefSeq	1244240	1244620	-	LLMG_RS06460;llmg_1274;	LLMG_RS06460	n	n	transcript_id gene1295; gene_id gene1295; gene_name LLMG_RS06460; Dbxref Genbank:WP_011835153.1; Name WP_011835153.1; gbkey CDS; inference COORDINATES: similar to AA sequence:RefSeq:NP_267385.1; product RidA family protein; transl_table 11; gbkey Gene; gene_biotype protein_coding; locus_tag LLMG_RS06460; old_locus_tag llmg_1274; protein_id WP_011835153.1;
llmg_1418	gene1435	0.637706	7.59346	4.37215	0.00218384	0.0092926	-2.00461	NC_009004.1	RefSeq	1385668	1386807	-	LLMG_RS07160;llmg_1418;	LLMG_RS07160	n	n	transcript_id gene1435; gene_id gene1435; gene_name LLMG_RS07160; Dbxref Genbank:WP_011835277.1; Name WP_011835277.1; gbkey CDS; inference COORDINATES: similar to AA sequence:RefSeq:NP_267295.1; product coproporphyrinogen III oxidase; transl_table 11; gbkey Gene; gene_biotype protein_coding; locus_tag LLMG_RS07160; old_locus_tag llmg_1418; protein_id WP_011835277.1;
llmg_1625	gene1636	-0.710672	6.7739	-4.36798	0.00219639	0.00932993	-1.90325	NC_009004.1	RefSeq	1601728	1602447	-	LLMG_RS08180;llmg_1625;	LLMG_RS08180	n	n	transcript_id gene1636; gene_id gene1636; gene_name LLMG_RS08180; Dbxref Genbank:WP_011835450.1; Name WP_011835450.1; gbkey CDS; inference COORDINATES: similar to AA sequence:RefSeq:NP_267066.1; product DUF4811 domain-containing protein; transl_table 11; gbkey Gene; gene_biotype protein_coding; locus_tag LLMG_RS08180; old_locus_tag llmg_1625; protein_id WP_011835450.1;
llmg_2012	gene2012	-1.00669	8.24241	-4.35962	0.0022218	0.00942166	-2.0892	NC_009004.1	RefSeq	1999452	2000369	-	LLMG_RS10070;llmg_2012;	LLMG_RS10070	n	n	transcript_id gene2012; gene_id gene2012; gene_name LLMG_RS10070; Dbxref Genbank:WP_011835739.1; Name WP_011835739.1; gbkey CDS; inference COORDINATES: similar to AA sequence:RefSeq:WP_015082776.1; product gfo/Idh/MocA family oxidoreductase; transl_table 11; gbkey Gene; gene_biotype protein_coding; locus_tag LLMG_RS10070; old_locus_tag llmg_2012; protein_id WP_011835739.1;
llmg_1854	gene1855	0.755759	6.40002	4.34948	0.00225306	0.0095378	-1.83765	NC_009004.1	RefSeq	1833817	1834461	+	LLMG_RS09290;llmg_1854;	LLMG_RS09290	llm00730, llm00790, llm02020	Thiamine metabolism , Folate biosynthesis , Two-component system	transcript_id gene1855; gene_id gene1855; gene_name LLMG_RS09290; Dbxref Genbank:WP_011835619.1; Name WP_011835619.1; gbkey CDS; inference COORDINATES: similar to AA sequence:RefSeq:NP_266869.1; product alkaline phosphatase-like protein; transl_table 11; gbkey Gene; gene_biotype protein_coding; locus_tag LLMG_RS09290; old_locus_tag llmg_1854; protein_id WP_011835619.1;
llmg_0636	gene663	1.30153	8.31516	4.34766	0.00225872	0.00954541	-2.03964	NC_009004.1	RefSeq	629583	632129	+	LLMG_RS03320;llmg_0636;	LLMG_RS03320	llm00020, llm00630	Citrate cycle (TCA cycle) , Glyoxylate and dicarboxylate metabolism	transcript_id gene663; gene_id gene663; gene_name acnA; Dbxref Genbank:WP_011834645.1; Name WP_011834645.1; gbkey CDS; inference COORDINATES: similar to AA sequence:RefSeq:NP_266827.1; product aconitate hydratase AcnA; transl_table 11; Name acnA; gbkey Gene; gene_biotype protein_coding; locus_tag LLMG_RS03320; old_locus_tag llmg_0636; protein_id WP_011834645.1;
LLMG_RS10140	gene2026	1.06635	7.56384	4.33775	0.00228978	0.00966011	-2.04026	NC_009004.1	RefSeq	2013052	2014011	-	LLMG_RS10140;pseudotrue;	LLMG_RS10140	n	n	transcript_id gene2026; gene_id gene2026; gene_name LLMG_RS10140; Note internal stop; gbkey CDS; inference COORDINATES: similar to AA sequence:RefSeq:NP_267997.1; product ABC transporter ATP-binding protein; pseudo true; transl_table 11; gbkey Gene; gene_biotype pseudogene; locus_tag LLMG_RS10140; pseudo true;
llmg_1995	gene1997	-1.01351	9.68294	-4.33479	0.00229915	0.0096831	-1.97982	NC_009004.1	RefSeq	1984175	1984972	-	LLMG_RS09995;llmg_1995;	LLMG_RS09995	n	n	transcript_id gene1997; gene_id gene1997; gene_name LLMG_RS09995; Dbxref Genbank:WP_011835727.1; Name WP_011835727.1; gbkey CDS; inference COORDINATES: similar to AA sequence:RefSeq:NP_267968.1; product DUF1803 domain-containing protein; transl_table 11; gbkey Gene; gene_biotype protein_coding; locus_tag LLMG_RS09995; old_locus_tag llmg_1995; protein_id WP_011835727.1;
llmg_0242	gene255	-1.10305	9.60107	-4.33182	0.0023086	0.00968982	-1.9926	NC_009004.1	RefSeq	230628	231344	+	LLMG_RS01270;llmg_0242;	LLMG_RS01270	n	n	transcript_id gene255; gene_id gene255; gene_name LLMG_RS01270; Dbxref Genbank:WP_011834324.1; Name WP_011834324.1; gbkey CDS; inference COORDINATES: similar to AA sequence:RefSeq:NP_266388.1; product YebC/PmpR family DNA-binding transcriptional regulator; transl_table 11; gbkey Gene; gene_biotype protein_coding; locus_tag LLMG_RS01270; old_locus_tag llmg_0242; protein_id WP_011834324.1;
llmg_2039	gene2036	-0.741589	7.40144	-4.33212	0.00230763	0.00968982	-2.08405	NC_009004.1	RefSeq	2022177	2022578	-	LLMG_RS10190;llmg_2039;	LLMG_RS10190	n	n	transcript_id gene2036; gene_id gene2036; gene_name LLMG_RS10190; Dbxref Genbank:WP_014735129.1; Name WP_014735129.1; gbkey CDS; inference COORDINATES: similar to AA sequence:RefSeq:WP_011676862.1; product ribonuclease III; transl_table 11; gbkey Gene; gene_biotype protein_coding; locus_tag LLMG_RS10190; old_locus_tag llmg_2039; protein_id WP_014735129.1;
llmg_0279	gene292	-0.934878	6.45605	-4.33039	0.00231315	0.00969247	-1.89702	NC_009004.1	RefSeq	265272	265556	+	LLMG_RS01455;llmg_0279;	LLMG_RS01455	n	n	transcript_id gene292; gene_id gene292; gene_name LLMG_RS01455; Dbxref Genbank:WP_011675299.1; Name WP_011675299.1; gbkey CDS; inference COORDINATES: similar to AA sequence:RefSeq:NP_266427.1; product hypothetical protein; transl_table 11; gbkey Gene; gene_biotype protein_coding; locus_tag LLMG_RS01455; old_locus_tag llmg_0279; protein_id WP_011675299.1;
llmg_0874	gene900	0.768474	7.85435	4.31714	0.00235589	0.00982444	-2.05203	NC_009004.1	RefSeq	843396	844289	+	LLMG_RS04470;llmg_0874;	LLMG_RS04470	llm00261, llm00300	Monobactam biosynthesis , Lysine biosynthesis	transcript_id gene900; gene_id gene900; gene_name LLMG_RS04470; Dbxref Genbank:WP_011834836.1; Name WP_011834836.1; gbkey CDS; inference COORDINATES: similar to AA sequence:RefSeq:NP_267776.1; product 4-hydroxy-tetrahydrodipicolinate synthase; transl_table 11; gbkey Gene; gene_biotype protein_coding; locus_tag LLMG_RS04470; old_locus_tag llmg_0874; protein_id WP_011834836.1;
llmg_1544	gene1556	-1.02382	9.32809	-4.31692	0.00235659	0.00982444	-2.05315	NC_009004.1	RefSeq	1516864	1517841	+	LLMG_RS07765;llmg_1544;	LLMG_RS07765	llm00230, llm00240	Purine metabolism , Pyrimidine metabolism	transcript_id gene1556; gene_id gene1556; gene_name LLMG_RS07765; Dbxref Genbank:WP_011675984.1; Name WP_011675984.1; Note B2 or R2 protein%3B type 1b enzyme%3B catalyzes the rate-limiting step in dNTP synthesis%3B converts nucleotides to deoxynucleotides%3B forms a homodimer and then a multimeric complex with NrdE; gbkey CDS; inference COORDINATES: similar to AA sequence:RefSeq:NP_267130.1; prod…
llmg_1815	gene1816	-0.811011	8.59585	-4.31847	0.00235157	0.00982444	-2.1416	NC_009004.1	RefSeq	1795345	1795797	-	LLMG_RS09095;llmg_1815;	LLMG_RS09095	llm03010	Ribosome	transcript_id gene1816; gene_id gene1816; gene_name LLMG_RS09095; Dbxref Genbank:WP_011835586.1; Name WP_011835586.1; gbkey CDS; inference COORDINATES: similar to AA sequence:RefSeq:NP_266901.1; product 50S ribosomal protein L9; transl_table 11; gbkey Gene; gene_biotype protein_coding; locus_tag LLMG_RS09095; old_locus_tag llmg_1815; protein_id WP_011835586.1;
llmg_2391	gene2397	-0.812319	10.3191	-4.31311	0.00236904	0.00985968	-1.9331	NC_009004.1	RefSeq	2331759	2333576	-	LLMG_RS11985;llmg_2391;	LLMG_RS11985	n	n	transcript_id gene2397; gene_id gene2397; gene_name LLMG_RS11985; Dbxref Genbank:WP_011836032.1; Name WP_011836032.1; gbkey CDS; inference COORDINATES: similar to AA sequence:RefSeq:NP_268264.1; product acetyltransferase; transl_table 11; gbkey Gene; gene_biotype protein_coding; locus_tag LLMG_RS11985; old_locus_tag llmg_2391; protein_id WP_011836032.1;
llmg_1079	gene1099	1.13891	5.6748	4.31062	0.00237724	0.00987716	-1.80966	NC_009004.1	RefSeq	1037518	1037865	-	LLMG_RS05480;llmg_1079;	LLMG_RS05480	n	n	transcript_id gene1099; gene_id gene1099; gene_name LLMG_RS05480; Dbxref Genbank:WP_011834988.1; Name WP_011834988.1; gbkey CDS; inference COORDINATES: similar to AA sequence:RefSeq:WP_011834988.1; product DUF1093 domain-containing protein; transl_table 11; gbkey Gene; gene_biotype protein_coding; locus_tag LLMG_RS05480; old_locus_tag llmg_1079; protein_id WP_011834988.1;
llmg_2478	gene2491	-0.622353	9.17555	-4.30138	0.00240781	0.00998737	-2.08533	NC_009004.1	RefSeq	2435218	2436879	-	LLMG_RS12450;llmg_2478;	LLMG_RS12450	llm03030, llm03430, llm03440	DNA replication , Mismatch repair , Homologous recombination	transcript_id gene2491; gene_id gene2491; gene_name LLMG_RS12450; Dbxref Genbank:WP_011836107.1; Name WP_011836107.1; gbkey CDS; inference COORDINATES: similar to AA sequence:RefSeq:NP_268351.1; product DNA polymerase III subunit gamma/tau; transl_table 11; gbkey Gene; gene_biotype protein_coding; locus_tag LLMG_RS12450; old_locus_tag llmg_2478; protein_id WP_011836107.1;

## Sheet: Table 2
# FS1076 grown on SAL vs M17(Control)
Gene_code	Gene	LogFC	AveExpr	t	P.Value	adj.P.Val	B	Referred genome	Database	Start	End	Strand	Tag	Locus_information	Pathway_code	Pathway
llmg_0075	gene83	-1.54075	9.29534	-10.2896	5.29758e-06	0.000408576	4.61771	NC_009004.1	RefSeq	70691	71692	-	transcript_id gene83; gene_id gene83; gene_name LLMG_RS00410; Dbxref Genbank:WP_011834178.1; Name WP_011834178.1; gbkey CDS; inference COORDINATES: similar to AA sequence:RefSeq:NP_266219.1; product lipoate--protein ligase A; transl_table 11; gbkey Gene; gene_biotype protein_coding; locus_tag LLMG_RS00410; old_locus_tag llmg_0075; protein_id WP_011834178.1;	LLMG_RS00410;llmg_0075;	n	n
llmg_0078	gene86	-1.92366	5.96508	-7.46014	5.99427e-05	0.00211341	2.22023	NC_009004.1	RefSeq	73518	73844	-	transcript_id gene86; gene_id gene86; gene_name LLMG_RS00425; Dbxref Genbank:WP_011834181.1; Name WP_011834181.1; gbkey CDS; inference COORDINATES: similar to AA sequence:RefSeq:WP_011675122.1; product hypothetical protein; transl_table 11; gbkey Gene; gene_biotype protein_coding; locus_tag LLMG_RS00425; old_locus_tag llmg_0078; protein_id WP_011834181.1;	LLMG_RS00425;llmg_0078;	n	n
llmg_0079	gene87	-2.28852	8.3879	-11.7647	1.86245e-06	0.000218882	5.71441	NC_009004.1	RefSeq	73937	74962	-	transcript_id gene87; gene_id gene87; gene_name trpS; Dbxref Genbank:WP_011834182.1; Name WP_011834182.1; gbkey CDS; inference COORDINATES: similar to AA sequence:RefSeq:NP_266222.1; product tryptophan--tRNA ligase; transl_table 11; Name trpS; gbkey Gene; gene_biotype protein_coding; locus_tag LLMG_RS00430; old_locus_tag llmg_0079; protein_id WP_011834182.1;	LLMG_RS00430;llmg_0079;	llm00970	Aminoacyl-tRNA biosynthesis
llmg_0128	gene137	-1.57835	8.78781	-8.93778	1.55896e-05	0.000836417	3.48728	NC_009004.1	RefSeq	123002	123301	-	transcript_id gene137; gene_id gene137; gene_name LLMG_RS00685; Dbxref Genbank:WP_011675168.1; Name WP_011675168.1; gbkey CDS; inference COORDINATES: similar to AA sequence:RefSeq:NP_266276.1; product YbaB/EbfC family nucleoid-associated protein; transl_table 11; gbkey Gene; gene_biotype protein_coding; locus_tag LLMG_RS00685; old_locus_tag llmg_0128; protein_id WP_011675168.1;	LLMG_RS00685;llmg_0128;	n	n
llmg_0130	gene140	1.28741	7.33671	5.99396	0.000283834	0.00714798	0.390432	NC_009004.1	RefSeq	123974	124909	-	transcript_id gene140; gene_id gene140; gene_name LLMG_RS00700; Dbxref Genbank:WP_014734899.1; Name WP_014734899.1; gbkey CDS; inference COORDINATES: similar to AA sequence:RefSeq:NP_266277.1; product alpha/beta hydrolase; transl_table 11; gbkey Gene; gene_biotype protein_coding; locus_tag LLMG_RS00700; old_locus_tag llmg_0130; protein_id WP_014734899.1;	LLMG_RS00700;llmg_0130;	n	n
llmg_0132	gene142	-1.99731	5.50629	-7.8839	3.99192e-05	0.00161509	2.68358	NC_009004.1	RefSeq	126611	126964	+	transcript_id gene142; gene_id gene142; gene_name LLMG_RS00710; Dbxref Genbank:WP_080506500.1; Name WP_080506500.1; gbkey CDS; inference COORDINATES: similar to AA sequence:RefSeq:NP_266278.1; product QacE family quaternary ammonium compound efflux SMR transporter; transl_table 11; gbkey Gene; gene_biotype protein_coding; locus_tag LLMG_RS00710; old_locus_tag llmg_0132; protein_id WP_080506500.1;	LLMG_RS00710;llmg_0132;	n	n
llmg_0165	gene178	-1.04619	8.99961	-6.0942	0.000253154	0.00644108	0.495296	NC_009004.1	RefSeq	156088	156777	+	transcript_id gene178; gene_id gene178; gene_name LLMG_RS00885; Dbxref Genbank:WP_011834257.1; Name WP_011834257.1; gbkey CDS; inference COORDINATES: similar to AA sequence:RefSeq:NP_266309.1; product DUF975 domain-containing protein; transl_table 11; gbkey Gene; gene_biotype protein_coding; locus_tag LLMG_RS00885; old_locus_tag llmg_0165; protein_id WP_011834257.1;	LLMG_RS00885;llmg_0165;	n	n
llmg_0169	gene183	-2.18294	7.08461	-8.52064	2.23628e-05	0.00112635	3.16877	NC_009004.1	RefSeq	159944	160183	+	transcript_id gene183; gene_id gene183; gene_name LLMG_RS00910; Dbxref Genbank:WP_011675217.1; Name WP_011675217.1; gbkey CDS; inference COORDINATES: similar to AA sequence:RefSeq:NP_266314.1; product hypothetical protein; transl_table 11; gbkey Gene; gene_biotype protein_coding; locus_tag LLMG_RS00910; old_locus_tag llmg_0169; protein_id WP_011675217.1;	LLMG_RS00910;llmg_0169;	n	n
llmg_0229	gene242	0.825947	8.3445	5.91331	0.000311484	0.00756111	0.250948	NC_009004.1	RefSeq	218798	219991	-	transcript_id gene242; gene_id gene242; gene_name LLMG_RS13045; Dbxref Genbank:WP_014734909.1; Name WP_014734909.1; gbkey CDS; inference COORDINATES: similar to AA sequence:RefSeq:WP_011675255.1; product hypothetical protein; transl_table 11; gbkey Gene; gene_biotype protein_coding; locus_tag LLMG_RS13045; old_locus_tag llmg_0229; protein_id WP_014734909.1;	LLMG_RS13045;llmg_0229;	n	n
llmg_0230	gene243	1.32506	10.5385	6.8409	0.000112217	0.00353719	1.53107	NC_009004.1	RefSeq	220476	221957	+	transcript_id gene243; gene_id gene243; gene_name LLMG_RS01210; Dbxref Genbank:WP_011834313.1; Name WP_011834313.1; gbkey CDS; inference COORDINATES: similar to AA sequence:RefSeq:WP_003090086.1; product IMP dehydrogenase; transl_table 11; gbkey Gene; gene_biotype protein_coding; locus_tag LLMG_RS01210; old_locus_tag llmg_0230; protein_id WP_011834313.1;	LLMG_RS01210;llmg_0230;	llm00230	Purine metabolism
llmg_0292	gene306	1.01907	7.59824	5.86798	0.000328312	0.00765244	0.200118	NC_009004.1	RefSeq	280504	281634	+	transcript_id gene306; gene_id gene306; gene_name LLMG_RS01525; Dbxref Genbank:WP_011834362.1; Name WP_011834362.1; gbkey CDS; inference COORDINATES: similar to AA sequence:RefSeq:WP_014571978.1; product acetyldiaminopimelate deacetylase; transl_table 11; gbkey Gene; gene_biotype protein_coding; locus_tag LLMG_RS01525; old_locus_tag llmg_0292; protein_id WP_011834362.1;	LLMG_RS01525;llmg_0292;	llm00300	Lysine biosynthesis
llmg_0299	gene314	1.47876	8.62524	10.3361	5.11591e-06	0.000407293	4.64753	NC_009004.1	RefSeq	289175	290209	+	transcript_id gene314; gene_id gene314; gene_name LLMG_RS01565; Dbxref Genbank:WP_011834368.1; Name WP_011834368.1; gbkey CDS; inference COORDINATES: similar to AA sequence:RefSeq:WP_003131714.1; product adenosine deaminase; transl_table 11; gbkey Gene; gene_biotype protein_coding; locus_tag LLMG_RS01565; old_locus_tag llmg_0299; protein_id WP_011834368.1;	LLMG_RS01565;llmg_0299;	llm00230	Purine metabolism
llmg_0312	gene326	0.978208	7.47677	6.66456	0.000135186	0.0039719	1.13407	NC_009004.1	RefSeq	298060	299109	+	transcript_id gene326; gene_id gene326; gene_name LLMG_RS01620; Dbxref Genbank:WP_011834376.1; Name WP_011834376.1; gbkey CDS; inference COORDINATES: similar to AA sequence:RefSeq:NP_266455.1; product phosphonate ABC transporter substrate-binding protein; transl_table 11; gbkey Gene; gene_biotype protein_coding; locus_tag LLMG_RS01620; old_locus_tag llmg_0312; protein_id WP_011834376.1;	LLMG_RS01620;llmg_0312;	llm02010	ABC transporters
llmg_0333	gene346	-3.63021	9.63738	-12.9742	8.59809e-07	0.000141467	6.51547	NC_009004.1	RefSeq	321464	321940	-	transcript_id gene346; gene_id gene346; gene_name LLMG_RS01720; Dbxref Genbank:WP_011834395.1; Name WP_011834395.1; gbkey CDS; inference COORDINATES: similar to AA sequence:RefSeq:NP_266472.1; product aminoacyl-tRNA deacylase; transl_table 11; gbkey Gene; gene_biotype protein_coding; locus_tag LLMG_RS01720; old_locus_tag llmg_0333; protein_id WP_011834395.1;	LLMG_RS01720;llmg_0333;	n	n
llmg_0334	gene347	-5.37823	8.66172	-22.8444	8.94463e-09	2.20753e-05	10.4285	NC_009004.1	RefSeq	322003	322551	-	transcript_id gene347; gene_id gene347; gene_name thiT; Dbxref Genbank:WP_011834396.1; Name WP_011834396.1; gbkey CDS; inference COORDINATES: similar to AA sequence:RefSeq:WP_011675374.1; product thiamine transporter ThiT; transl_table 11; Name thiT; gbkey Gene; gene_biotype protein_coding; locus_tag LLMG_RS01725; old_locus_tag llmg_0334; protein_id WP_011834396.1;	LLMG_RS01725;llmg_0334;	n	n
llmg_0341	gene353	-1.10149	8.54149	-5.86662	0.000328832	0.00765244	0.199243	NC_009004.1	RefSeq	327999	329105	+	transcript_id gene353; gene_id gene353; gene_name LLMG_RS01755; Dbxref Genbank:WP_011834402.1; Name WP_011834402.1; gbkey CDS; inference COORDINATES: similar to AA sequence:RefSeq:NP_266478.1; product methionine import ATP-binding protein MetN; transl_table 11; gbkey Gene; gene_biotype protein_coding; locus_tag LLMG_RS01755; old_locus_tag llmg_0341; protein_id WP_011834402.1;	LLMG_RS01755;llmg_0341;	llm02010	ABC transporters
llmg_0372	gene384	1.72261	9.63169	7.461	5.98923e-05	0.00211341	2.15192	NC_009004.1	RefSeq	363700	365292	+	transcript_id gene384; gene_id gene384; gene_name LLMG_RS01910; Dbxref Genbank:WP_011834427.1; Name WP_011834427.1; gbkey CDS; inference COORDINATES: similar to AA sequence:RefSeq:NP_266508.1; product asparagine synthase B; transl_table 11; gbkey Gene; gene_biotype protein_coding; locus_tag LLMG_RS01910; old_locus_tag llmg_0372; protein_id WP_011834427.1;	LLMG_RS01910;llmg_0372;	llm00250	Alanine, aspartate and glutamate metabolism
llmg_0376	gene388	1.06575	9.59027	6.70626	0.000129321	0.00384534	1.30552	NC_009004.1	RefSeq	369088	370467	-	transcript_id gene388; gene_id gene388; gene_name LLMG_RS01930; Dbxref Genbank:WP_011834429.1; Name WP_011834429.1; gbkey CDS; inference COORDINATES: similar to AA sequence:RefSeq:NP_266512.1; product amino acid permease; transl_table 11; gbkey Gene; gene_biotype protein_coding; locus_tag LLMG_RS01930; old_locus_tag llmg_0376; protein_id WP_011834429.1;	LLMG_RS01930;llmg_0376;	n	n
llmg_0410	gene421	-1.60755	8.27373	-9.3162	1.13726e-05	0.00067597	3.80471	NC_009004.1	RefSeq	403761	404045	+	transcript_id gene421; gene_id gene421; gene_name LLMG_RS02095; Dbxref Genbank:WP_011834459.1; Name WP_011834459.1; gbkey CDS; inference COORDINATES: similar to AA sequence:RefSeq:NP_266549.1; product co-chaperone GroES; transl_table 11; gbkey Gene; gene_biotype protein_coding; locus_tag LLMG_RS02095; old_locus_tag llmg_0410; protein_id WP_011834459.1;	LLMG_RS02095;llmg_0410;	n	n
llmg_0411	gene422	-1.22885	9.32665	-6.40707	0.000178579	0.00468866	0.872727	NC_009004.1	RefSeq	404132	405760	+	transcript_id gene422; gene_id gene422; gene_name groL; Dbxref Genbank:WP_011834460.1; Name WP_011834460.1; gbkey CDS; inference COORDINATES: similar to AA sequence:RefSeq:NP_266550.1; product molecular chaperone GroEL; transl_table 11; Name groL; gbkey Gene; gene_biotype protein_coding; locus_tag LLMG_RS02100; old_locus_tag llmg_0411; protein_id WP_011834460.1;	LLMG_RS02100;llmg_0411;	llm03018	RNA degradation
llmg_0507	gene518	-1.25008	9.46613	-7.53828	5.55403e-05	0.00206426	2.17711	NC_009004.1	RefSeq	498140	499789	-	transcript_id gene518; gene_id gene518; gene_name LLMG_RS02580; Dbxref Genbank:WP_011834545.1; Name WP_011834545.1; gbkey CDS; inference COORDINATES: similar to AA sequence:RefSeq:NP_266695.1; product peptide ABC transporter substrate-binding protein; transl_table 11; gbkey Gene; gene_biotype protein_coding; locus_tag LLMG_RS02580; old_locus_tag llmg_0507; protein_id WP_011834545.1;	LLMG_RS02580;llmg_0507;	llm02010, llm02024	ABC transporters , Quorum sensing
llmg_0527	gene556	-1.29065	9.25242	-6.484	0.000164192	0.00445303	0.952913	NC_009004.1	RefSeq	526116	526460	+	transcript_id gene556; gene_id gene556; gene_name LLMG_RS02770; Dbxref Genbank:WP_011834562.1; Name WP_011834562.1; gbkey CDS; inference COORDINATES: similar to AA sequence:RefSeq:WP_011675567.1; product hypothetical protein; transl_table 11; gbkey Gene; gene_biotype protein_coding; locus_tag LLMG_RS02770; old_locus_tag llmg_0527; protein_id WP_011834562.1;	LLMG_RS02770;llmg_0527;	n	n
llmg_0565	gene589	1.2034	8.63567	6.83236	0.000113224	0.00353719	1.36379	NC_009004.1	RefSeq	557905	559002	+	transcript_id gene589; gene_id gene589; gene_name LLMG_RS02940; Dbxref Genbank:WP_011834591.1; Name WP_011834591.1; gbkey CDS; inference COORDINATES: similar to AA sequence:RefSeq:NP_266759.1; product phosphoserine aminotransferase; transl_table 11; gbkey Gene; gene_biotype protein_coding; locus_tag LLMG_RS02940; old_locus_tag llmg_0565; protein_id WP_011834591.1;	LLMG_RS02940;llmg_0565;	llm00260, llm00680, llm00750	Glycine, serine and threonine metabolism , Methane metabolism , Vitamin B6 metabolism
llmg_0566	gene590	1.17972	8.63781	8.05146	3.41527e-05	0.00147875	2.64077	NC_009004.1	RefSeq	558999	560195	+	transcript_id gene590; gene_id gene590; gene_name LLMG_RS02945; Dbxref Genbank:WP_011834592.1; Name WP_011834592.1; gbkey CDS; inference COORDINATES: similar to AA sequence:RefSeq:WP_011675605.1; product 3-phosphoglycerate dehydrogenase; transl_table 11; gbkey Gene; gene_biotype protein_coding; locus_tag LLMG_RS02945; old_locus_tag llmg_0566; protein_id WP_011834592.1;	LLMG_RS02945;llmg_0566;	llm00260, llm00680	Glycine, serine and threonine metabolism , Methane metabolism
llmg_0627	gene654	1.03144	9.16817	5.8848	0.000321954	0.00764022	0.280992	NC_009004.1	RefSeq	615570	617093	-	transcript_id gene654; gene_id gene654; gene_name LLMG_RS03275; Dbxref Genbank:WP_011834637.1; Name WP_011834637.1; gbkey CDS; inference COORDINATES: similar to AA sequence:RefSeq:NP_266818.1; product acetate--CoA ligase; transl_table 11; gbkey Gene; gene_biotype protein_coding; locus_tag LLMG_RS03275; old_locus_tag llmg_0627; protein_id WP_011834637.1;	LLMG_RS03275;llmg_0627;	llm00010, llm00620, llm00630, llm00640, llm00680	Glycolysis / Gluconeogenesis , Pyruvate metabolism , Glyoxylate and dicarboxylate metabolism , Propanoate metabolism , Methane metabolism
llmg_0697	gene726	1.75913	10.77	7.92067	3.85673e-05	0.00160467	2.69456	NC_009004.1	RefSeq	683542	684558	+	transcript_id gene726; gene_id gene726; gene_name LLMG_RS03595; Dbxref Genbank:WP_011834692.1; Name WP_011834692.1; gbkey CDS; inference COORDINATES: similar to AA sequence:RefSeq:NP_267998.1; product ABC transporter ATP-binding protein; transl_table 11; gbkey Gene; gene_biotype protein_coding; locus_tag LLMG_RS03595; old_locus_tag llmg_0697; protein_id WP_011834692.1;	LLMG_RS03595;llmg_0697;	llm02024	Quorum sensing
llmg_0698	gene727	1.7596	10.224	7.59409	5.26146e-05	0.00202895	2.33956	NC_009004.1	RefSeq	684555	685514	+	transcript_id gene727; gene_id gene727; gene_name LLMG_RS03600; Dbxref Genbank:WP_010906164.1; Name WP_010906164.1; gbkey CDS; inference COORDINATES: similar to AA sequence:RefSeq:NP_267997.1; product oligopeptide transport ATP-binding protein OppF; transl_table 11; gbkey Gene; gene_biotype protein_coding; locus_tag LLMG_RS03600; old_locus_tag llmg_0698; protein_id WP_010906164.1;	LLMG_RS03600;llmg_0698;	llm02024	Quorum sensing
llmg_0699	gene728	1.97974	10.0625	10.7047	3.89759e-06	0.000356268	5.0105	NC_009004.1	RefSeq	685495	686454	+	transcript_id gene728; gene_id gene728; gene_name LLMG_RS03605; Dbxref Genbank:WP_010906163.1; Name WP_010906163.1; gbkey CDS; inference COORDINATES: similar to AA sequence:RefSeq:NP_267996.1; product peptide ABC transporter permease; transl_table 11; gbkey Gene; gene_biotype protein_coding; locus_tag LLMG_RS03605; old_locus_tag llmg_0699; protein_id WP_010906163.1;	LLMG_RS03605;llmg_0699;	llm02024	Quorum sensing
llmg_0700	gene729	2.16759	10.5466	9.69256	8.39859e-06	0.00053148	4.25056	NC_009004.1	RefSeq	686464	687348	+	transcript_id gene729; gene_id gene729; gene_name LLMG_RS03610; Dbxref Genbank:WP_003140250.1; Name WP_003140250.1; gbkey CDS; inference COORDINATES: similar to AA sequence:RefSeq:NP_267995.1; product peptide ABC transporter permease; transl_table 11; gbkey Gene; gene_biotype protein_coding; locus_tag LLMG_RS03610; old_locus_tag llmg_0700; protein_id WP_003140250.1;	LLMG_RS03610;llmg_0700;	llm02024	Quorum sensing
llmg_0701	gene730	1.94639	12.0125	7.2695	7.23938e-05	0.0024815	2.10122	NC_009004.1	RefSeq	687458	689260	+	transcript_id gene730; gene_id gene730; gene_name LLMG_RS03615; Dbxref Genbank:WP_011834693.1; Name WP_011834693.1; gbkey CDS; inference COORDINATES: similar to AA sequence:RefSeq:NP_267994.1; product oligopeptide-binding protein oppA; transl_table 11; gbkey Gene; gene_biotype protein_coding; locus_tag LLMG_RS03615; old_locus_tag llmg_0701; protein_id WP_011834693.1;	LLMG_RS03615;llmg_0701;	llm02024	Quorum sensing
llmg_0702	gene731	2.37368	10.0887	11.1687	2.79952e-06	0.00028827	5.34554	NC_009004.1	RefSeq	689385	691268	+	transcript_id gene731; gene_id gene731; gene_name LLMG_RS03620; Dbxref Genbank:WP_011834694.1; Name WP_011834694.1; gbkey CDS; inference COORDINATES: similar to AA sequence:RefSeq:NP_267960.1; product peptidase M13; transl_table 11; gbkey Gene; gene_biotype protein_coding; locus_tag LLMG_RS03620; old_locus_tag llmg_0702; protein_id WP_011834694.1;	LLMG_RS03620;llmg_0702;	n	n
llmg_0934	gene959	0.949035	8.30425	6.26507	0.000208914	0.00537082	0.679139	NC_009004.1	RefSeq	903241	904197	+	transcript_id gene959; gene_id gene959; gene_name LLMG_RS04765; Dbxref Genbank:WP_011834879.1; Name WP_011834879.1; gbkey CDS; inference COORDINATES: similar to AA sequence:RefSeq:WP_015082632.1; product ferrochelatase; transl_table 11; gbkey Gene; gene_biotype protein_coding; locus_tag LLMG_RS04765; old_locus_tag llmg_0934; protein_id WP_011834879.1;	LLMG_RS04765;llmg_0934;	llm00860	Porphyrin and chlorophyll metabolism
llmg_0935	gene960	1.04129	8.67451	6.46911	0.000166874	0.00447657	0.954545	NC_009004.1	RefSeq	904250	905068	+	transcript_id gene960; gene_id gene960; gene_name LLMG_RS04770; Dbxref Genbank:WP_080506532.1; Name WP_080506532.1; gbkey CDS; inference COORDINATES: similar to AA sequence:RefSeq:NP_267722.1; product alpha/beta hydrolase; transl_table 11; gbkey Gene; gene_biotype protein_coding; locus_tag LLMG_RS04770; old_locus_tag llmg_0935; protein_id WP_080506532.1;	LLMG_RS04770;llmg_0935;	llm00564	Glycerophospholipid metabolism
llmg_0945	gene970	2.06067	8.45438	10.9078	3.36685e-06	0.000332376	5.10017	NC_009004.1	RefSeq	913106	914185	+	transcript_id gene970; gene_id gene970; gene_name LLMG_RS04820; Dbxref Genbank:WP_011834889.1; Name WP_011834889.1; gbkey CDS; inference COORDINATES: similar to AA sequence:RefSeq:NP_267712.1; product oxidoreductase; transl_table 11; gbkey Gene; gene_biotype protein_coding; locus_tag LLMG_RS04820; old_locus_tag llmg_0945; protein_id WP_011834889.1;	LLMG_RS04820;llmg_0945;	n	n
llmg_0947	gene971	2.10253	7.87455	12.4847	1.16594e-06	0.000169267	6.19403	NC_009004.1	RefSeq	914269	915222	+	transcript_id gene971; gene_id gene971; gene_name LLMG_RS04825; Dbxref Genbank:WP_011834890.1; Name WP_011834890.1; gbkey CDS; inference COORDINATES: similar to AA sequence:RefSeq:WP_011834890.1; product LysR family transcriptional regulator; transl_table 11; gbkey Gene; gene_biotype protein_coding; locus_tag LLMG_RS04825; old_locus_tag llmg_0947; protein_id WP_011834890.1;	LLMG_RS04825;llmg_0947;	n	n
llmg_0952	gene976	1.44749	9.01202	6.75793	0.000122439	0.00370235	1.30484	NC_009004.1	RefSeq	919131	920066	+	transcript_id gene976; gene_id gene976; gene_name LLMG_RS04850; Dbxref Genbank:WP_011834894.1; Name WP_011834894.1; gbkey CDS; inference COORDINATES: similar to AA sequence:RefSeq:NP_267708.1; product dihydroorotate dehydrogenase; transl_table 11; gbkey Gene; gene_biotype protein_coding; locus_tag LLMG_RS04850; old_locus_tag llmg_0952; protein_id WP_011834894.1;	LLMG_RS04850;llmg_0952;	llm00240	Pyrimidine metabolism
llmg_0973	gene996	2.61734	7.22899	9.8022	7.70325e-06	0.000505186	4.27628	NC_009004.1	RefSeq	936877	937587	+	transcript_id gene996; gene_id gene996; gene_name LLMG_RS04950; Dbxref Genbank:WP_011676479.1; Name WP_011676479.1; gbkey CDS; inference COORDINATES: similar to AA sequence:RefSeq:NP_267689.1; product phosphoribosylaminoimidazolesuccinocarboxamide synthase; transl_table 11; gbkey Gene; gene_biotype protein_coding; locus_tag LLMG_RS04950; old_locus_tag llmg_0973; protein_id WP_011676479.1;	LLMG_RS04950;llmg_0973;	llm00230	Purine metabolism
llmg_0974	gene997	3.39223	5.31978	14.611	3.33552e-07	0.000115287	7.38939	NC_009004.1	RefSeq	937642	937908	+	transcript_id gene997; gene_id gene997; gene_name LLMG_RS04955; Dbxref Genbank:WP_011676478.1; Name WP_011676478.1; gbkey CDS; inference COORDINATES: similar to AA sequence:RefSeq:WP_011676478.1; product phosphoribosylformylglycinamidine synthase subunit PurS; transl_table 11; gbkey Gene; gene_biotype protein_coding; locus_tag LLMG_RS04955; old_locus_tag llmg_0974; protein_id WP_011676478.1;	LLMG_RS04955;llmg_0974;	llm00230	Purine metabolism
llmg_0976	gene999	2.2375	9.16316	6.50496	0.000160498	0.00445065	1.06185	NC_009004.1	RefSeq	938802	941021	+	transcript_id gene999; gene_id gene999; gene_name LLMG_RS04965; Dbxref Genbank:WP_011834914.1; Name WP_011834914.1; gbkey CDS; inference COORDINATES: similar to AA sequence:RefSeq:NP_267686.1; product phosphoribosylformylglycinamidine synthase subunit PurL; transl_table 11; gbkey Gene; gene_biotype protein_coding; locus_tag LLMG_RS04965; old_locus_tag llmg_0976; protein_id WP_011834914.1;	LLMG_RS04965;llmg_0976;	llm00230	Purine metabolism
llmg_0977	gene1000	3.71873	7.35925	14.7811	3.04029e-07	0.000115287	7.52217	NC_009004.1	RefSeq	941072	942526	+	transcript_id gene1000; gene_id gene1000; gene_name LLMG_RS04970; Dbxref Genbank:WP_042211555.1; Name WP_042211555.1; gbkey CDS; inference COORDINATES: similar to AA sequence:RefSeq:WP_014024959.1; product amidophosphoribosyltransferase; transl_table 11; gbkey Gene; gene_biotype protein_coding; locus_tag LLMG_RS04970; old_locus_tag llmg_0977; protein_id WP_042211555.1;	LLMG_RS04970;llmg_0977;	llm00230, llm00250	Purine metabolism , Alanine, aspartate and glutamate metabolism
llmg_0986	gene1006	-1.61785	11.7281	-6.55734	0.000151658	0.00430221	1.25644	NC_009004.1	RefSeq	948593	951196	+	transcript_id gene1006; gene_id gene1006; gene_name clpB; Dbxref Genbank:WP_011834922.1; Name WP_011834922.1; gbkey CDS; inference COORDINATES: similar to AA sequence:RefSeq:NP_267681.1; product chaperone protein ClpB; transl_table 11; Name clpB; gbkey Gene; gene_biotype protein_coding; locus_tag LLMG_RS05015; old_locus_tag llmg_0986; protein_id WP_011834922.1;	LLMG_RS05015;llmg_0986;	n	n
llmg_0994	gene1014	2.29669	7.21511	10.5651	4.31607e-06	0.000374126	4.86277	NC_009004.1	RefSeq	958681	960237	+	transcript_id gene1014; gene_id gene1014; gene_name LLMG_RS05055; Dbxref Genbank:WP_011834927.1; Name WP_011834927.1; gbkey CDS; inference COORDINATES: similar to AA sequence:RefSeq:NP_267674.1; product bifunctional phosphoribosylaminoimidazolecarboxamide formyltransferase/inosine monophosphate cyclohydrolase; transl_table 11; gbkey Gene; gene_biotype protein_coding; locus_tag LLMG_RS05055; old_l…	LLMG_RS05055;llmg_0994;	llm00230, llm00670	Purine metabolism , One carbon pool by folate
llmg_0998	gene1019	2.64665	6.38823	12.0771	1.51523e-06	0.000196821	5.95329	NC_009004.1	RefSeq	964919	965611	+	transcript_id gene1019; gene_id gene1019; gene_name LLMG_RS05080; Dbxref Genbank:WP_011834930.1; Name WP_011834930.1; gbkey CDS; inference COORDINATES: similar to AA sequence:RefSeq:WP_015082597.1; product haloacid dehalogenase; transl_table 11; gbkey Gene; gene_biotype protein_coding; locus_tag LLMG_RS05080; old_locus_tag llmg_0998; protein_id WP_011834930.1;	LLMG_RS05080;llmg_0998;	n	n
llmg_0999	gene1020	2.63096	5.55463	11.3363	2.49156e-06	0.000279507	5.46389	NC_009004.1	RefSeq	965608	966093	+	transcript_id gene1020; gene_id gene1020; gene_name purE; Dbxref Genbank:WP_011676459.1; Name WP_011676459.1; gbkey CDS; inference COORDINATES: similar to AA sequence:RefSeq:WP_011676459.1; product 5-(carboxyamino)imidazole ribonucleotide mutase; transl_table 11; Name purE; gbkey Gene; gene_biotype protein_coding; locus_tag LLMG_RS05085; old_locus_tag llmg_0999; protein_id WP_011676459.1;	LLMG_RS05085;llmg_0999;	llm00230	Purine metabolism
llmg_1000	gene1021	2.66648	7.07275	12.3572	1.2645e-06	0.000173378	6.12813	NC_009004.1	RefSeq	966149	967255	+	transcript_id gene1021; gene_id gene1021; gene_name LLMG_RS05090; Dbxref Genbank:WP_011834931.1; Name WP_011834931.1; gbkey CDS; inference COORDINATES: similar to AA sequence:RefSeq:WP_011676458.1; product 5-(carboxyamino)imidazole ribonucleotide synthase; transl_table 11; gbkey Gene; gene_biotype protein_coding; locus_tag LLMG_RS05090; old_locus_tag llmg_1000; protein_id WP_011834931.1;	LLMG_RS05090;llmg_1000;	llm00230	Purine metabolism
llmg_1026	gene1047	-1.02836	8.63417	-6.83881	0.000112462	0.00353719	1.33515	NC_009004.1	RefSeq	992059	992802	+	transcript_id gene1047; gene_id gene1047; gene_name LLMG_RS05215; Dbxref Genbank:WP_011834954.1; Name WP_011834954.1; gbkey CDS; inference COORDINATES: similar to AA sequence:RefSeq:NP_267629.1; product methyltransferase domain-containing protein; transl_table 11; gbkey Gene; gene_biotype protein_coding; locus_tag LLMG_RS05215; old_locus_tag llmg_1026; protein_id WP_011834954.1;	LLMG_RS05215;llmg_1026;	n	n
llmg_1030	gene1051	-2.65152	8.25414	-13.9151	4.92628e-07	0.000128113	7.06668	NC_009004.1	RefSeq	994809	996179	+	transcript_id gene1051; gene_id gene1051; gene_name LLMG_RS05235; Dbxref Genbank:WP_011834957.1; Name WP_011834957.1; gbkey CDS; inference COORDINATES: similar to AA sequence:RefSeq:NP_267626.1; product anthranilate synthase component I; transl_table 11; gbkey Gene; gene_biotype protein_coding; locus_tag LLMG_RS05235; old_locus_tag llmg_1030; protein_id WP_011834957.1;	LLMG_RS05235;llmg_1030;	llm00400, llm02024	Phenylalanine, tyrosine and tryptophan biosynthesis , Quorum sensing
llmg_1031	gene1052	-1.82338	6.45543	-10.1768	5.76888e-06	0.000418753	4.60198	NC_009004.1	RefSeq	996231	996812	+	transcript_id gene1052; gene_id gene1052; gene_name LLMG_RS05240; Dbxref Genbank:WP_011834958.1; Name WP_011834958.1; gbkey CDS; inference COORDINATES: similar to AA sequence:RefSeq:NP_267625.1; product type 1 glutamine amidotransferase; transl_table 11; gbkey Gene; gene_biotype protein_coding; locus_tag LLMG_RS05240; old_locus_tag llmg_1031; protein_id WP_011834958.1;	LLMG_RS05240;llmg_1031;	llm00400, llm02024	Phenylalanine, tyrosine and tryptophan biosynthesis , Quorum sensing
llmg_1032	gene1053	-1.67965	7.74607	-9.78983	7.77839e-06	0.000505186	4.21206	NC_009004.1	RefSeq	996817	997824	+	transcript_id gene1053; gene_id gene1053; gene_name trpD; Dbxref Genbank:WP_011834959.1; Name WP_011834959.1; gbkey CDS; inference COORDINATES: similar to AA sequence:RefSeq:NP_267624.2; product anthranilate phosphoribosyltransferase; transl_table 11; Name trpD; gbkey Gene; gene_biotype protein_coding; locus_tag LLMG_RS05245; old_locus_tag llmg_1032; protein_id WP_011834959.1;	LLMG_RS05245;llmg_1032;	llm00400	Phenylalanine, tyrosine and tryptophan biosynthesis
llmg_1034	gene1055	-1.82412	6.73038	-10.2447	5.47997e-06	0.000409835	4.63628	NC_009004.1	RefSeq	998571	998824	+	transcript_id gene1055; gene_id gene1055; gene_name LLMG_RS05255; Note frameshifted; gbkey CDS; inference COORDINATES: similar to AA sequence:RefSeq:WP_015082576.1; product hypothetical protein; pseudo true; transl_table 11; gbkey Gene; gene_biotype pseudogene; locus_tag LLMG_RS05255; old_locus_tag llmg_1034; pseudo true;	LLMG_RS05255;llmg_1034;pseudotrue;	n	n
llmg_1038	gene1057	-1.4582	6.71273	-7.90844	3.90113e-05	0.00160467	2.57689	NC_009004.1	RefSeq	999809	1000603	+	transcript_id gene1057; gene_id gene1057; gene_name LLMG_RS05265; Dbxref Genbank:WP_011676418.1; Name WP_011676418.1; gbkey CDS; inference COORDINATES: similar to AA sequence:RefSeq:NP_267623.1; product indole-3-glycerol-phosphate synthase; transl_table 11; gbkey Gene; gene_biotype protein_coding; locus_tag LLMG_RS05265; old_locus_tag llmg_1038; protein_id WP_011676418.1;	LLMG_RS05265;llmg_1038;	llm00400	Phenylalanine, tyrosine and tryptophan biosynthesis
llmg_1039	gene1058	-1.21713	7.04892	-7.56907	5.39042e-05	0.0020467	2.18063	NC_009004.1	RefSeq	1000593	1001651	+	transcript_id gene1058; gene_id gene1058; gene_name LLMG_RS05270; Dbxref Genbank:WP_011834963.1; Name WP_011834963.1; gbkey CDS; inference COORDINATES: similar to AA sequence:RefSeq:WP_015082575.1; product phosphoribosylanthranilate isomerase; transl_table 11; gbkey Gene; gene_biotype protein_coding; locus_tag LLMG_RS05270; old_locus_tag llmg_1039; protein_id WP_011834963.1;	LLMG_RS05270;llmg_1039;	llm00400	Phenylalanine, tyrosine and tryptophan biosynthesis
llmg_1041	gene1060	-0.982312	7.51491	-6.62358	0.000141238	0.00410087	1.0953	NC_009004.1	RefSeq	1002258	1003463	+	transcript_id gene1060; gene_id gene1060; gene_name trpB; Dbxref Genbank:WP_011834965.1; Name WP_011834965.1; gbkey CDS; inference COORDINATES: similar to AA sequence:RefSeq:NP_267619.1; product tryptophan synthase subunit beta; transl_table 11; Name trpB; gbkey Gene; gene_biotype protein_coding; locus_tag LLMG_RS05280; old_locus_tag llmg_1041; protein_id WP_011834965.1;	LLMG_RS05280;llmg_1041;	llm00260, llm00400	Glycine, serine and threonine metabolism , Phenylalanine, tyrosine and tryptophan biosynthesis
llmg_1042	gene1061	-1.46605	6.7447	-9.30223	1.15035e-05	0.00067597	3.84679	NC_009004.1	RefSeq	1003463	1004224	+	transcript_id gene1061; gene_id gene1061; gene_name LLMG_RS05285; Dbxref Genbank:WP_011834966.1; Name WP_011834966.1; gbkey CDS; inference COORDINATES: similar to AA sequence:RefSeq:NP_267618.1; product tryptophan synthase subunit alpha; transl_table 11; gbkey Gene; gene_biotype protein_coding; locus_tag LLMG_RS05285; old_locus_tag llmg_1042; protein_id WP_011834966.1;	LLMG_RS05285;llmg_1042;	llm00260, llm00400	Glycine, serine and threonine metabolism , Phenylalanine, tyrosine and tryptophan biosynthesis
llmg_1107	gene1127	0.938406	7.75323	6.94519	0.000100679	0.00326943	1.44945	NC_009004.1	RefSeq	1068466	1069179	+	transcript_id gene1127; gene_id gene1127; gene_name LLMG_RS05620; Dbxref Genbank:WP_011835015.1; Name WP_011835015.1; gbkey CDS; inference COORDINATES: similar to AA sequence:RefSeq:NP_267501.1; product orotidine-5'-phosphate decarboxylase; transl_table 11; gbkey Gene; gene_biotype protein_coding; locus_tag LLMG_RS05620; old_locus_tag llmg_1107; protein_id WP_011835015.1;	LLMG_RS05620;llmg_1107;	llm00240	Pyrimidine metabolism
llmg_1115	gene1135	-3.17021	10.4774	-13.5074	6.24357e-07	0.000128113	6.82405	NC_009004.1	RefSeq	1074531	1075157	+	transcript_id gene1135; gene_id gene1135; gene_name LLMG_RS05660; Dbxref Genbank:WP_011835023.1; Name WP_011835023.1; gbkey CDS; inference COORDINATES: similar to AA sequence:RefSeq:NP_267493.1; product XpaC-like protein; transl_table 11; gbkey Gene; gene_biotype protein_coding; locus_tag LLMG_RS05660; old_locus_tag llmg_1115; protein_id WP_011835023.1;	LLMG_RS05660;llmg_1115;	n	n
llmg_1116	gene1136	-1.7642	10.336	-6.49326	0.000162549	0.00445303	1.09271	NC_009004.1	RefSeq	1075298	1076476	+	transcript_id gene1136; gene_id gene1136; gene_name LLMG_RS05665; Dbxref Genbank:WP_011835024.1; Name WP_011835024.1; gbkey CDS; inference COORDINATES: similar to AA sequence:RefSeq:NP_267492.1; product toxic anion resistance protein; transl_table 11; gbkey Gene; gene_biotype protein_coding; locus_tag LLMG_RS05665; old_locus_tag llmg_1116; protein_id WP_011835024.1;	LLMG_RS05665;llmg_1116;	n	n
llmg_1136	gene1155	-3.67918	7.40183	-13.1444	7.7534e-07	0.000136681	6.61399	NC_009004.1	RefSeq	1102206	1102919	+	transcript_id gene1155; gene_id gene1155; gene_name LLMG_RS05770; Dbxref Genbank:WP_011835041.1; Name WP_011835041.1; gbkey CDS; inference COORDINATES: similar to AA sequence:RefSeq:NP_267474.1; product metal ABC transporter ATP-binding protein; transl_table 11; gbkey Gene; gene_biotype protein_coding; locus_tag LLMG_RS05770; old_locus_tag llmg_1136; protein_id WP_011835041.1;	LLMG_RS05770;llmg_1136;	llm02010	ABC transporters
llmg_1137	gene1156	-3.02388	7.57218	-9.06304	1.40271e-05	0.000769307	3.66603	NC_009004.1	RefSeq	1102926	1103765	+	transcript_id gene1156; gene_id gene1156; gene_name LLMG_RS05775; Dbxref Genbank:WP_011835042.1; Name WP_011835042.1; gbkey CDS; inference COORDINATES: similar to AA sequence:RefSeq:NP_267473.1; product metal ABC transporter permease; transl_table 11; gbkey Gene; gene_biotype protein_coding; locus_tag LLMG_RS05775; old_locus_tag llmg_1137; protein_id WP_011835042.1;	LLMG_RS05775;llmg_1137;	llm02010	ABC transporters
llmg_1138	gene1157	-3.72997	8.05573	-11.9774	1.61753e-06	0.000199603	5.88746	NC_009004.1	RefSeq	1103765	1104712	+	transcript_id gene1157; gene_id gene1157; gene_name LLMG_RS05780; Dbxref Genbank:WP_011835043.1; Name WP_011835043.1; gbkey CDS; inference COORDINATES: similar to AA sequence:RefSeq:NP_267472.1; product metal ABC transporter substrate-binding protein; transl_table 11; gbkey Gene; gene_biotype protein_coding; locus_tag LLMG_RS05780; old_locus_tag llmg_1138; protein_id WP_011835043.1;	LLMG_RS05780;llmg_1138;	llm02010	ABC transporters
llmg_1155	gene1174	-3.931	7.99979	-10.7525	3.76473e-06	0.000356268	5.04394	NC_009004.1	RefSeq	1124076	1124447	+	transcript_id gene1174; gene_id gene1174; gene_name LLMG_RS05865; Dbxref Genbank:WP_011835057.1; Name WP_011835057.1; gbkey CDS; inference COORDINATES: similar to AA sequence:RefSeq:NP_267469.2; product Spx-like protein; transl_table 11; gbkey Gene; gene_biotype protein_coding; locus_tag LLMG_RS05865; old_locus_tag llmg_1155; protein_id WP_011835057.1;	LLMG_RS05865;llmg_1155;	n	n
llmg_1156	gene1175	-2.52092	7.83041	-10.0935	6.14699e-06	0.000433451	4.49682	NC_009004.1	RefSeq	1124506	1124832	+	transcript_id gene1175; gene_id gene1175; gene_name LLMG_RS05870; Dbxref Genbank:WP_011835058.1; Name WP_011835058.1; gbkey CDS; inference COORDINATES: similar to AA sequence:RefSeq:WP_011835058.1; product arsenical resistance operon transcriptional repressor ArsD; transl_table 11; gbkey Gene; gene_biotype protein_coding; locus_tag LLMG_RS05870; old_locus_tag llmg_1156; protein_id WP_011835058.1;	LLMG_RS05870;llmg_1156;	n	n
llmg_1184	gene1201	0.98496	8.37331	5.64727	0.000425811	0.00921844	-0.0770193	NC_009004.1	RefSeq	1155761	1157200	+	transcript_id gene1201; gene_id gene1201; gene_name LLMG_RS05995; Dbxref Genbank:WP_011835085.1; Name WP_011835085.1; gbkey CDS; inference COORDINATES: similar to AA sequence:RefSeq:NP_267441.1; product glutamate synthase subunit beta; transl_table 11; gbkey Gene; gene_biotype protein_coding; locus_tag LLMG_RS05995; old_locus_tag llmg_1184; protein_id WP_011835085.1;	LLMG_RS05995;llmg_1184;	llm00250, llm00910	Alanine, aspartate and glutamate metabolism , Nitrogen metabolism
llmg_1195	gene1212	-3.49218	10.2506	-14.4049	3.73702e-07	0.000115287	7.33242	NC_009004.1	RefSeq	1164663	1165283	+	transcript_id gene1212; gene_id gene1212; gene_name LLMG_RS06050; Dbxref Genbank:WP_011835093.1; Name WP_011835093.1; gbkey CDS; inference COORDINATES: similar to AA sequence:RefSeq:NP_267430.2; product riboflavin transporter RibU; transl_table 11; gbkey Gene; gene_biotype protein_coding; locus_tag LLMG_RS06050; old_locus_tag llmg_1195; protein_id WP_011835093.1;	LLMG_RS06050;llmg_1195;	n	n
llmg_1216	gene1232	-3.49906	8.05571	-16.0057	1.60446e-07	0.000115287	8.12884	NC_009004.1	RefSeq	1184278	1185030	+	transcript_id gene1232; gene_id gene1232; gene_name LLMG_RS06145; Dbxref Genbank:WP_011835107.1; Name WP_011835107.1; gbkey CDS; inference COORDINATES: similar to AA sequence:RefSeq:WP_011676189.1; product hydroxyethylthiazole kinase; transl_table 11; gbkey Gene; gene_biotype protein_coding; locus_tag LLMG_RS06145; old_locus_tag llmg_1216; protein_id WP_011835107.1;	LLMG_RS06145;llmg_1216;	llm00730	Thiamine metabolism
llmg_1217	gene1233	-2.99616	7.99911	-13.4685	6.38842e-07	0.000128113	6.8094	NC_009004.1	RefSeq	1185043	1185843	+	transcript_id gene1233; gene_id gene1233; gene_name thiD; Dbxref Genbank:WP_011835108.1; Name WP_011835108.1; gbkey CDS; inference COORDINATES: similar to AA sequence:RefSeq:NP_267419.1; product bifunctional hydroxymethylpyrimidine kinase/phosphomethylpyrimidine kinase; transl_table 11; Name thiD; gbkey Gene; gene_biotype protein_coding; locus_tag LLMG_RS06150; old_locus_tag llmg_1217; protein_id…	LLMG_RS06150;llmg_1217;	llm00730	Thiamine metabolism
llmg_1218	gene1234	-2.43085	8.03464	-9.9868	6.67243e-06	0.000457432	4.41179	NC_009004.1	RefSeq	1185836	1186492	+	transcript_id gene1234; gene_id gene1234; gene_name LLMG_RS06155; Dbxref Genbank:WP_011835109.1; Name WP_011835109.1; gbkey CDS; inference COORDINATES: similar to AA sequence:RefSeq:WP_014572663.1; product thiamine phosphate synthase; transl_table 11; gbkey Gene; gene_biotype protein_coding; locus_tag LLMG_RS06155; old_locus_tag llmg_1218; protein_id WP_011835109.1;	LLMG_RS06155;llmg_1218;	llm00730	Thiamine metabolism
llmg_1219	gene1236	1.28236	10.4433	6.45105	0.000170192	0.00451648	1.06881	NC_009004.1	RefSeq	1186831	1188330	+	transcript_id gene1236; gene_id gene1236; gene_name dltA; Dbxref Genbank:WP_011835110.1; Name WP_011835110.1; gbkey CDS; inference COORDINATES: similar to AA sequence:RefSeq:NP_267417.1; product D-alanine--poly(phosphoribitol) ligase subunit 1; transl_table 11; Name dltA; gbkey Gene; gene_biotype protein_coding; locus_tag LLMG_RS06160; old_locus_tag llmg_1219; protein_id WP_011835110.1;	LLMG_RS06160;llmg_1219;	llm00473, llm02020	D-Alanine metabolism , Two-component system
llmg_1220	gene1237	1.6495	9.86217	8.2292	2.90246e-05	0.00129625	2.89402	NC_009004.1	RefSeq	1188330	1189553	+	transcript_id gene1237; gene_id gene1237; gene_name dltB; Dbxref Genbank:WP_011835111.1; Name WP_011835111.1; gbkey CDS; inference COORDINATES: similar to AA sequence:RefSeq:NP_267416.1; product D-alanyl-lipoteichoic acid biosynthesis protein DltB; transl_table 11; Name dltB; gbkey Gene; gene_biotype protein_coding; locus_tag LLMG_RS06165; old_locus_tag llmg_1220; protein_id WP_011835111.1;	LLMG_RS06165;llmg_1220;	llm02020	Two-component system
llmg_1221	gene1238	1.90421	9.21073	10.5254	4.44424e-06	0.000374126	4.82377	NC_009004.1	RefSeq	1189589	1189828	+	transcript_id gene1238; gene_id gene1238; gene_name LLMG_RS06170; Dbxref Genbank:WP_011676184.1; Name WP_011676184.1; gbkey CDS; inference COORDINATES: similar to AA sequence:RefSeq:NP_267415.1; product D-alanine--poly(phosphoribitol) ligase subunit 2; transl_table 11; gbkey Gene; gene_biotype protein_coding; locus_tag LLMG_RS06170; old_locus_tag llmg_1221; protein_id WP_011676184.1;	LLMG_RS06170;llmg_1221;	llm00473, llm02020	D-Alanine metabolism , Two-component system
llmg_1227	gene1244	1.7029	7.34574	10.4942	4.54772e-06	0.000374126	4.78058	NC_009004.1	RefSeq	1198699	1199721	+	transcript_id gene1244; gene_id gene1244; gene_name LLMG_RS06200; Dbxref Genbank:WP_011835116.1; Name WP_011835116.1; gbkey CDS; inference COORDINATES: similar to AA sequence:RefSeq:NP_267409.1; product 3-deoxy-7-phosphoheptulonate synthase; transl_table 11; gbkey Gene; gene_biotype protein_coding; locus_tag LLMG_RS06200; old_locus_tag llmg_1227; protein_id WP_011835116.1;	LLMG_RS06200;llmg_1227;	llm00400, llm02024	Phenylalanine, tyrosine and tryptophan biosynthesis , Quorum sensing
llmg_1276	gene1297	1.28219	7.62373	6.75351	0.000123012	0.00370235	1.25141	NC_009004.1	RefSeq	1245506	1246756	-	transcript_id gene1297; gene_id gene1297; gene_name LLMG_RS06470; Dbxref Genbank:WP_011835155.1; Name WP_011835155.1; Note catalyzes the formation of 2-oxobutanoate from L-threonine%3B biosynthetic; gbkey CDS; inference COORDINATES: similar to AA sequence:RefSeq:NP_267383.1; product threonine dehydratase; transl_table 11; gbkey Gene; gene_biotype protein_coding; locus_tag LLMG_RS06470; old_locus_…	LLMG_RS06470;llmg_1276;	llm00260, llm00290	Glycine, serine and threonine metabolism , Valine, leucine and isoleucine biosynthesis
llmg_1277	gene1298	1.12871	6.84998	5.702	0.000398982	0.00879185	0.0569088	NC_009004.1	RefSeq	1246815	1247837	-	transcript_id gene1298; gene_id gene1298; gene_name LLMG_RS06475; Dbxref Genbank:WP_011835156.1; Name WP_011835156.1; gbkey CDS; inference COORDINATES: similar to AA sequence:RefSeq:NP_267382.1; product ketol-acid reductoisomerase; transl_table 11; gbkey Gene; gene_biotype protein_coding; locus_tag LLMG_RS06475; old_locus_tag llmg_1277; protein_id WP_011835156.1;	LLMG_RS06475;llmg_1277;	llm00290, llm00770	Valine, leucine and isoleucine biosynthesis , Pantothenate and CoA biosynthesis
llmg_1278	gene1299	1.43417	5.88062	5.67911	0.000409969	0.00895402	0.172914	NC_009004.1	RefSeq	1247882	1248358	-	transcript_id gene1299; gene_id gene1299; gene_name LLMG_RS06480; Dbxref Genbank:WP_011835157.1; Name WP_011835157.1; gbkey CDS; inference COORDINATES: similar to AA sequence:RefSeq:NP_267381.1; product acetolactate synthase small subunit; transl_table 11; gbkey Gene; gene_biotype protein_coding; locus_tag LLMG_RS06480; old_locus_tag llmg_1278; protein_id WP_011835157.1;	LLMG_RS06480;llmg_1278;	llm00290, llm00650, llm00660, llm00770	Valine, leucine and isoleucine biosynthesis , Butanoate metabolism , C5-Branched dibasic acid metabolism , Pantothenate and CoA biosynthesis
llmg_1304	gene1326	0.947017	9.14824	5.85897	0.000331771	0.00765244	0.240082	NC_009004.1	RefSeq	1272922	1274925	-	transcript_id gene1326; gene_id gene1326; gene_name rnr; Dbxref Genbank:WP_011835181.1; Name WP_011835181.1; gbkey CDS; inference COORDINATES: similar to AA sequence:RefSeq:WP_011676159.1; product ribonuclease R; transl_table 11; Name rnr; gbkey Gene; gene_biotype protein_coding; locus_tag LLMG_RS06615; old_locus_tag llmg_1304; protein_id WP_011835181.1;	LLMG_RS06615;llmg_1304;	llm03018	RNA degradation
llmg_1331	gene1351	1.05262	7.34506	6.60757	0.000143681	0.00412332	1.1008	NC_009004.1	RefSeq	1307334	1308224	-	transcript_id gene1351; gene_id gene1351; gene_name LLMG_RS06745; Dbxref Genbank:WP_011835204.1; Name WP_011835204.1; gbkey CDS; inference COORDINATES: similar to AA sequence:RefSeq:WP_011835204.1; product homoserine kinase; transl_table 11; gbkey Gene; gene_biotype protein_coding; locus_tag LLMG_RS06745; old_locus_tag llmg_1331; protein_id WP_011835204.1;	LLMG_RS06745;llmg_1331;	llm00260	Glycine, serine and threonine metabolism
llmg_1332	gene1352	0.787217	8.64225	5.72343	0.000388981	0.00864869	0.0194925	NC_009004.1	RefSeq	1308229	1309515	-	transcript_id gene1352; gene_id gene1352; gene_name LLMG_RS06750; Dbxref Genbank:WP_011835205.1; Name WP_011835205.1; gbkey CDS; inference COORDINATES: similar to AA sequence:RefSeq:NP_267315.1; product homoserine dehydrogenase; transl_table 11; gbkey Gene; gene_biotype protein_coding; locus_tag LLMG_RS06750; old_locus_tag llmg_1332; protein_id WP_011835205.1;	LLMG_RS06750;llmg_1332;	llm00260, llm00270, llm00300	Glycine, serine and threonine metabolism , Cysteine and methionine metabolism , Lysine biosynthesis
llmg_1345	gene1365	1.2909	8.32497	8.43856	2.40491e-05	0.00118706	3.00917	NC_009004.1	RefSeq	1318899	1320203	-	transcript_id gene1365; gene_id gene1365; gene_name LLMG_RS06815; Dbxref Genbank:WP_011835216.1; Name WP_011835216.1; gbkey CDS; inference COORDINATES: similar to AA sequence:RefSeq:NP_267303.1; product purine permease; transl_table 11; gbkey Gene; gene_biotype protein_coding; locus_tag LLMG_RS06815; old_locus_tag llmg_1345; protein_id WP_011835216.1;	LLMG_RS06815;llmg_1345;	n	n
llmg_1346	gene1366	1.04828	6.99156	5.91051	0.000312493	0.00756111	0.281723	NC_009004.1	RefSeq	1320261	1320854	-	transcript_id gene1366; gene_id gene1366; gene_name LLMG_RS06820; Dbxref Genbank:WP_011835217.1; Name WP_011835217.1; gbkey CDS; inference COORDINATES: similar to AA sequence:RefSeq:NP_267302.1; product xanthine phosphoribosyltransferase; transl_table 11; gbkey Gene; gene_biotype protein_coding; locus_tag LLMG_RS06820; old_locus_tag llmg_1346; protein_id WP_011835217.1;	LLMG_RS06820;llmg_1346;	llm00230	Purine metabolism
llmg_1371	gene1392	-1.42699	7.8447	-8.34113	2.6236e-05	0.0012452	2.90496	NC_009004.1	RefSeq	1345518	1347317	-	transcript_id gene1392; gene_id gene1392; gene_name LLMG_RS06945; Dbxref Genbank:WP_011835237.1; Name WP_011835237.1; gbkey CDS; inference COORDINATES: similar to AA sequence:RefSeq:WP_011835237.1; product group II intron-encoded protein LtrA; transl_table 11; gbkey Gene; gene_biotype protein_coding; locus_tag LLMG_RS06945; old_locus_tag llmg_1371; protein_id WP_011835237.1;	LLMG_RS06945;llmg_1371;	n	n
llmg_1402	gene1420	-1.32586	4.90444	-5.82387	0.000345645	0.00784498	0.456411	NC_009004.1	RefSeq	1375104	1375466	-	transcript_id gene1420; gene_id gene1420; gene_name LLMG_RS07085; Dbxref Genbank:WP_011835264.1; Name WP_011835264.1; gbkey CDS; inference COORDINATES: similar to AA sequence:RefSeq:WP_011835264.1; product hypothetical protein; transl_table 11; gbkey Gene; gene_biotype protein_coding; locus_tag LLMG_RS07085; old_locus_tag llmg_1402; protein_id WP_011835264.1;	LLMG_RS07085;llmg_1402;	n	n
llmg_1429	gene1445	-1.35684	7.51461	-5.56489	0.000469988	0.0099994	-0.130578	NC_009004.1	RefSeq	1396766	1397737	-	transcript_id gene1445; gene_id gene1445; gene_name LLMG_RS07210; Dbxref Genbank:WP_011676241.1; Name WP_011676241.1; gbkey CDS; inference COORDINATES: similar to AA sequence:RefSeq:NP_267284.1; product L-lactate dehydrogenase; transl_table 11; gbkey Gene; gene_biotype protein_coding; locus_tag LLMG_RS07210; old_locus_tag llmg_1429; protein_id WP_011676241.1;	LLMG_RS07210;llmg_1429;	llm00010, llm00270, llm00620, llm00640	Glycolysis / Gluconeogenesis , Cysteine and methionine metabolism , Pyruvate metabolism , Propanoate metabolism
llmg_1490	gene1506	-3.70534	8.34794	-15.6421	1.93022e-07	0.000115287	7.95756	NC_009004.1	RefSeq	1462457	1463989	-	transcript_id gene1506; gene_id gene1506; gene_name LLMG_RS07515; Dbxref Genbank:WP_011835338.1; Name WP_011835338.1; gbkey CDS; inference COORDINATES: similar to AA sequence:RefSeq:WP_015082368.1; product divalent metal cation transporter; transl_table 11; gbkey Gene; gene_biotype protein_coding; locus_tag LLMG_RS07515; old_locus_tag llmg_1490; protein_id WP_011835338.1;	LLMG_RS07515;llmg_1490;	n	n
llmg_1509	gene1524	0.888267	7.33749	5.75032	0.000376824	0.00845455	0.124942	NC_009004.1	RefSeq	1483705	1484334	-	transcript_id gene1524; gene_id gene1524; gene_name LLMG_RS07605; Dbxref Genbank:WP_011835354.1; Name WP_011835354.1; gbkey CDS; inference COORDINATES: similar to AA sequence:RefSeq:WP_011676071.1; product orotate phosphoribosyltransferase; transl_table 11; gbkey Gene; gene_biotype protein_coding; locus_tag LLMG_RS07605; old_locus_tag llmg_1509; protein_id WP_011835354.1;	LLMG_RS07605;llmg_1509;	llm00240	Pyrimidine metabolism
llmg_1529	gene1542	-3.04224	7.42727	-8.8651	1.65842e-05	0.000870846	3.50961	NC_009004.1	RefSeq	1501033	1501497	-	transcript_id gene1542; gene_id gene1542; gene_name LLMG_RS07695; Dbxref Genbank:WP_011835371.1; Name WP_011835371.1; gbkey CDS; inference COORDINATES: similar to AA sequence:RefSeq:WP_011835371.1; product 6%2C7-dimethyl-8-ribityllumazine synthase; transl_table 11; gbkey Gene; gene_biotype protein_coding; locus_tag LLMG_RS07695; old_locus_tag llmg_1529; protein_id WP_011835371.1;	LLMG_RS07695;llmg_1529;	llm00740	Riboflavin metabolism
llmg_1530	gene1543	-2.74774	8.91302	-12.8357	9.36214e-07	0.000144411	6.42363	NC_009004.1	RefSeq	1501524	1502720	-	transcript_id gene1543; gene_id gene1543; gene_name LLMG_RS07700; Dbxref Genbank:WP_011835372.1; Name WP_011835372.1; gbkey CDS; inference COORDINATES: similar to AA sequence:RefSeq:NP_267151.1; product bifunctional 3%2C4-dihydroxy-2-butanone-4-phosphate synthase/GTP cyclohydrolase II; transl_table 11; gbkey Gene; gene_biotype protein_coding; locus_tag LLMG_RS07700; old_locus_tag llmg_1530; prote…	LLMG_RS07700;llmg_1530;	llm00740, llm00790	Riboflavin metabolism , Folate biosynthesis
llmg_1531	gene1544	-2.85379	8.04608	-15.0024	2.69895e-07	0.000115287	7.65152	NC_009004.1	RefSeq	1502732	1503379	-	transcript_id gene1544; gene_id gene1544; gene_name LLMG_RS07705; Dbxref Genbank:WP_011835373.1; Name WP_011835373.1; gbkey CDS; inference COORDINATES: similar to AA sequence:RefSeq:WP_011835373.1; product riboflavin synthase; transl_table 11; gbkey Gene; gene_biotype protein_coding; locus_tag LLMG_RS07705; old_locus_tag llmg_1531; protein_id WP_011835373.1;	LLMG_RS07705;llmg_1531;	llm00740	Riboflavin metabolism
llmg_1532	gene1545	-2.63919	9.14091	-13.5367	6.13669e-07	0.000128113	6.84721	NC_009004.1	RefSeq	1503379	1504467	-	transcript_id gene1545; gene_id gene1545; gene_name ribD; Dbxref Genbank:WP_011835374.1; Name WP_011835374.1; gbkey CDS; inference COORDINATES: similar to AA sequence:RefSeq:NP_267149.1; product bifunctional diaminohydroxyphosphoribosylaminopyrimidine deaminase/5-amino-6-(5-phosphoribosylamino)uracil reductase RibD; transl_table 11; Name ribD; gbkey Gene; gene_biotype protein_coding; locus_tag LL…	LLMG_RS07710;llmg_1532;	llm00740, llm02024	Riboflavin metabolism , Quorum sensing
llmg_1574	gene1586	-1.7769	9.85786	-9.06918	1.39551e-05	0.000769307	3.64826	NC_009004.1	RefSeq	1549632	1551455	-	transcript_id gene1586; gene_id gene1586; gene_name LLMG_RS07930; Dbxref Genbank:WP_011835408.1; Name WP_011835408.1; gbkey CDS; inference COORDINATES: similar to AA sequence:RefSeq:NP_267110.1; product molecular chaperone DnaK; transl_table 11; gbkey Gene; gene_biotype protein_coding; locus_tag LLMG_RS07930; old_locus_tag llmg_1574; protein_id WP_011835408.1;	LLMG_RS07930;llmg_1574;	llm03018	RNA degradation
llmg_1575	gene1587	-1.27285	7.33084	-6.38542	0.000182874	0.00475087	0.895179	NC_009004.1	RefSeq	1551527	1552066	-	transcript_id gene1587; gene_id gene1587; gene_name LLMG_RS07935; Dbxref Genbank:WP_011835409.1; Name WP_011835409.1; gbkey CDS; inference COORDINATES: similar to AA sequence:RefSeq:NP_267109.1; product nucleotide exchange factor GrpE; transl_table 11; gbkey Gene; gene_biotype protein_coding; locus_tag LLMG_RS07935; old_locus_tag llmg_1575; protein_id WP_011835409.1;	LLMG_RS07935;llmg_1575;	n	n
llmg_1580	gene1592	1.15317	7.47114	7.51387	5.68759e-05	0.00206426	2.09813	NC_009004.1	RefSeq	1555215	1555694	-	transcript_id gene1592; gene_id gene1592; gene_name LLMG_RS07960; Dbxref Genbank:WP_011835414.1; Name WP_011835414.1; gbkey CDS; inference COORDINATES: similar to AA sequence:RefSeq:NP_267104.1; product hypothetical protein; transl_table 11; gbkey Gene; gene_biotype protein_coding; locus_tag LLMG_RS07960; old_locus_tag llmg_1580; protein_id WP_011835414.1;	LLMG_RS07960;llmg_1580;	n	n
llmg_1649	gene1659	-1.4185	8.63215	-6.77774	0.000119909	0.00369918	1.28163	NC_009004.1	RefSeq	1626214	1627212	-	transcript_id gene1659; gene_id gene1659; gene_name LLMG_RS08300; Dbxref Genbank:WP_011835468.1; Name WP_011835468.1; gbkey CDS; inference COORDINATES: similar to AA sequence:RefSeq:NP_267046.1; product sensor histidine kinase; transl_table 11; gbkey Gene; gene_biotype protein_coding; locus_tag LLMG_RS08300; old_locus_tag llmg_1649; protein_id WP_011835468.1;	LLMG_RS08300;llmg_1649;	llm02020	Two-component system
llmg_1650	gene1660	-2.30907	9.15782	-8.2698	2.79769e-05	0.00129415	2.88673	NC_009004.1	RefSeq	1627209	1627838	-	transcript_id gene1660; gene_id gene1660; gene_name LLMG_RS08305; Dbxref Genbank:WP_014735080.1; Name WP_014735080.1; gbkey CDS; inference COORDINATES: similar to AA sequence:RefSeq:NP_267045.1; product hypothetical protein; transl_table 11; gbkey Gene; gene_biotype protein_coding; locus_tag LLMG_RS08305; old_locus_tag llmg_1650; protein_id WP_014735080.1;	LLMG_RS08305;llmg_1650;	n	n
llmg_1720	gene1725	1.08586	7.06962	7.14945	8.16874e-05	0.00276171	1.72778	NC_009004.1	RefSeq	1695684	1696400	-	transcript_id gene1725; gene_id gene1725; gene_name LLMG_RS08650; Dbxref Genbank:WP_011835514.1; Name WP_011835514.1; gbkey CDS; inference COORDINATES: similar to AA sequence:RefSeq:NP_266995.1; product uridine phosphorylase; transl_table 11; gbkey Gene; gene_biotype protein_coding; locus_tag LLMG_RS08650; old_locus_tag llmg_1720; protein_id WP_011835514.1;	LLMG_RS08650;llmg_1720;	llm00240	Pyrimidine metabolism
llmg_1735	gene1739	-1.70219	9.47724	-7.92748	3.83224e-05	0.00160467	2.54433	NC_009004.1	RefSeq	1713852	1715111	-	transcript_id gene1739; gene_id gene1739; gene_name LLMG_RS08720; Dbxref Genbank:WP_011835525.1; Name WP_011835525.1; gbkey CDS; inference COORDINATES: similar to AA sequence:RefSeq:NP_266984.1; product NAD(P)/FAD-dependent oxidoreductase; transl_table 11; gbkey Gene; gene_biotype protein_coding; locus_tag LLMG_RS08720; old_locus_tag llmg_1735; protein_id WP_011835525.1;	LLMG_RS08720;llmg_1735;	llm00190	Oxidative phosphorylation
llmg_1777	gene1780	-1.73171	9.88093	-5.89333	0.000318781	0.00763835	0.374384	NC_009004.1	RefSeq	1758672	1759466	-	transcript_id gene1780; gene_id gene1780; gene_name accA; Dbxref Genbank:WP_011835560.1; Name WP_011835560.1; gbkey CDS; inference COORDINATES: similar to AA sequence:RefSeq:NP_266936.1; product acetyl-CoA carboxylase carboxyl transferase subunit alpha; transl_table 11; Name accA; gbkey Gene; gene_biotype protein_coding; locus_tag LLMG_RS08920; old_locus_tag llmg_1777; protein_id WP_011835560.1;	LLMG_RS08920;llmg_1777;	llm00061, llm00620, llm00640	Fatty acid biosynthesis , Pyruvate metabolism , Propanoate metabolism
llmg_1788	gene1791	-1.6162	8.12682	-8.64102	2.01221e-05	0.00103461	3.19661	NC_009004.1	RefSeq	1767922	1768362	-	transcript_id gene1791; gene_id gene1791; gene_name LLMG_RS08970; Dbxref Genbank:WP_011675740.1; Name WP_011675740.1; gbkey CDS; inference COORDINATES: similar to AA sequence:RefSeq:NP_266926.1; product MarR family transcriptional regulator; transl_table 11; gbkey Gene; gene_biotype protein_coding; locus_tag LLMG_RS08970; old_locus_tag llmg_1788; protein_id WP_011675740.1;	LLMG_RS08970;llmg_1788;	n	n
llmg_1820	gene1821	1.31318	9.129	8.37723	2.5401e-05	0.00122921	2.99989	NC_009004.1	RefSeq	1800198	1801550	+	transcript_id gene1821; gene_id gene1821; gene_name LLMG_RS09120; Dbxref Genbank:WP_011835591.1; Name WP_011835591.1; gbkey CDS; inference COORDINATES: similar to AA sequence:RefSeq:NP_266896.1; product aspartate kinase; transl_table 11; gbkey Gene; gene_biotype protein_coding; locus_tag LLMG_RS09120; old_locus_tag llmg_1820; protein_id WP_011835591.1;	LLMG_RS09120;llmg_1820;	llm00260, llm00261, llm00270, llm00300	Glycine, serine and threonine metabolism , Monobactam biosynthesis , Cysteine and methionine metabolism , Lysine biosynthesis
llmg_1828	gene1828	-1.27846	7.87353	-6.97578	9.75485e-05	0.00321	1.50463	NC_009004.1	RefSeq	1807705	1808877	+	transcript_id gene1828; gene_id gene1828; gene_name LLMG_RS09155; Dbxref Genbank:WP_080506519.1; Name WP_080506519.1; gbkey CDS; inference COORDINATES: similar to AA sequence:RefSeq:NP_266888.1; product isochorismate synthase; transl_table 11; gbkey Gene; gene_biotype protein_coding; locus_tag LLMG_RS09155; old_locus_tag llmg_1828; protein_id WP_080506519.1;	LLMG_RS09155;llmg_1828;	llm00130	Ubiquinone and other terpenoid-quinone biosynthesis
llmg_1829	gene1829	-1.11771	8.04369	-7.66117	4.93213e-05	0.00193315	2.21546	NC_009004.1	RefSeq	1808919	1810583	+	transcript_id gene1829; gene_id gene1829; gene_name LLMG_RS09160; Dbxref Genbank:WP_011835600.1; Name WP_011835600.1; gbkey CDS; inference COORDINATES: similar to AA sequence:RefSeq:NP_266887.1; product 2-succinyl-5-enolpyruvyl-6-hydroxy-3-cyclohexene-1-carboxylate synthase; transl_table 11; gbkey Gene; gene_biotype protein_coding; locus_tag LLMG_RS09160; old_locus_tag llmg_1829; protein_id WP_01…	LLMG_RS09160;llmg_1829;	llm00130	Ubiquinone and other terpenoid-quinone biosynthesis
llmg_1830	gene1830	-0.917062	7.42878	-6.51615	0.000158563	0.00444698	1.00581	NC_009004.1	RefSeq	1810573	1811388	+	transcript_id gene1830; gene_id gene1830; gene_name menH; Dbxref Genbank:WP_011835601.1; Name WP_011835601.1; gbkey CDS; inference COORDINATES: similar to AA sequence:RefSeq:WP_014572947.1; product 2-succinyl-6-hydroxy-2%2C4-cyclohexadiene-1-carboxylate synthase; transl_table 11; Name menH; gbkey Gene; gene_biotype protein_coding; locus_tag LLMG_RS09165; old_locus_tag llmg_1830; protein_id WP_011…	LLMG_RS09165;llmg_1830;	llm00130	Ubiquinone and other terpenoid-quinone biosynthesis
llmg_1932	gene1931	1.54816	7.11854	9.35279	1.10374e-05	0.00067597	3.89792	NC_009004.1	RefSeq	1913487	1914266	-	transcript_id gene1931; gene_id gene1931; gene_name LLMG_RS09670; Dbxref Genbank:WP_011835679.1; Name WP_011835679.1; gbkey CDS; inference COORDINATES: similar to AA sequence:RefSeq:NP_267906.1; product ABC transporter ATP-binding protein; transl_table 11; gbkey Gene; gene_biotype protein_coding; locus_tag LLMG_RS09670; old_locus_tag llmg_1932; protein_id WP_011835679.1;	LLMG_RS09670;llmg_1932;	n	n
llmg_1933	gene1932	0.985043	7.11624	5.59527	0.000453138	0.00972473	-0.0547268	NC_009004.1	RefSeq	1914460	1914816	-	transcript_id gene1932; gene_id gene1932; gene_name LLMG_RS09675; Dbxref Genbank:WP_011676747.1; Name WP_011676747.1; gbkey CDS; inference COORDINATES: similar to AA sequence:RefSeq:NP_267907.1; product DUF1093 domain-containing protein; transl_table 11; gbkey Gene; gene_biotype protein_coding; locus_tag LLMG_RS09675; old_locus_tag llmg_1933; protein_id WP_011676747.1;	LLMG_RS09675;llmg_1933;	n	n
llmg_2163	gene2161	-2.32297	8.52619	-11.1668	2.80328e-06	0.00028827	5.29358	NC_009004.1	RefSeq	2123763	2124227	-	transcript_id gene2161; gene_id gene2161; gene_name LLMG_RS10810; Dbxref Genbank:WP_011835867.1; Name WP_011835867.1; gbkey CDS; inference COORDINATES: similar to AA sequence:RefSeq:NP_268061.1; product PspC domain-containing protein; transl_table 11; gbkey Gene; gene_biotype protein_coding; locus_tag LLMG_RS10810; old_locus_tag llmg_2163; protein_id WP_011835867.1;	LLMG_RS10810;llmg_2163;	n	n
llmg_2164	gene2163	-3.68549	10.3784	-18.721	4.52209e-08	5.58025e-05	9.25468	NC_009004.1	RefSeq	2124563	2125675	-	transcript_id gene2163; gene_id gene2163; gene_name LLMG_RS10820; Dbxref Genbank:WP_011676974.1; Name WP_011676974.1; gbkey CDS; inference COORDINATES: similar to AA sequence:RefSeq:WP_015082826.1; product DUF4097 domain-containing protein; transl_table 11; gbkey Gene; gene_biotype protein_coding; locus_tag LLMG_RS10820; old_locus_tag llmg_2164; protein_id WP_011676974.1;	LLMG_RS10820;llmg_2164;	n	n
llmg_2236	gene2243	-1.2342	7.26324	-7.51867	5.66106e-05	0.00206426	2.12666	NC_009004.1	RefSeq	2198351	2199370	-	transcript_id gene2243; gene_id gene2243; gene_name LLMG_RS11215; Dbxref Genbank:WP_011835927.1; Name WP_011835927.1; gbkey CDS; inference COORDINATES: similar to AA sequence:RefSeq:WP_011677036.1; product galactose mutarotase; transl_table 11; gbkey Gene; gene_biotype protein_coding; locus_tag LLMG_RS11215; old_locus_tag llmg_2236; protein_id WP_011835927.1;	LLMG_RS11215;llmg_2236;	llm00010, llm00052	Glycolysis / Gluconeogenesis , Galactose metabolism
llmg_2427	gene2437	1.17244	7.54978	7.27237	7.21863e-05	0.0024815	1.83816	NC_009004.1	RefSeq	2376782	2377273	-	transcript_id gene2437; gene_id gene2437; gene_name LLMG_RS12190; Dbxref Genbank:WP_011836065.1; Name WP_011836065.1; gbkey CDS; inference COORDINATES: similar to AA sequence:RefSeq:WP_015082943.1; product sigma-70 family RNA polymerase sigma factor; transl_table 11; gbkey Gene; gene_biotype protein_coding; locus_tag LLMG_RS12190; old_locus_tag llmg_2427; protein_id WP_011836065.1;	LLMG_RS12190;llmg_2427;	llm02020, llm02024	Two-component system , Quorum sensing
llmg_2484	gene2497	-1.45937	10.4844	-5.98298	0.000287434	0.00716553	0.533264	NC_009004.1	RefSeq	2439405	2440745	-	transcript_id gene2497; gene_id gene2497; gene_name glnA; Dbxref Genbank:WP_011836113.1; Name WP_011836113.1; gbkey CDS; inference COORDINATES: similar to AA sequence:RefSeq:NP_268357.1; product type I glutamate--ammonia ligase; transl_table 11; Name glnA; gbkey Gene; gene_biotype protein_coding; locus_tag LLMG_RS12480; old_locus_tag llmg_2484; protein_id WP_011836113.1;	LLMG_RS12480;llmg_2484;	llm00220, llm00250, llm00630, llm00910, llm02020	Arginine biosynthesis , Alanine, aspartate and glutamate metabolism , Glyoxylate and dicarboxylate metabolism , Nitrogen metabolism , Two-component system
llmg_2485	gene2498	-1.65185	9.78599	-7.04694	9.06715e-05	0.00302402	1.68126	NC_009004.1	RefSeq	2440807	2441172	-	transcript_id gene2498; gene_id gene2498; gene_name LLMG_RS12485; Dbxref Genbank:WP_011836114.1; Name WP_011836114.1; gbkey CDS; inference COORDINATES: similar to AA sequence:RefSeq:NP_268358.2; product MerR family transcriptional regulator; transl_table 11; gbkey Gene; gene_biotype protein_coding; locus_tag LLMG_RS12485; old_locus_tag llmg_2485; protein_id WP_011836114.1;	LLMG_RS12485;llmg_2485;	n	n
llmg_2517	gene2530	-0.887144	6.69553	-5.82182	0.000346476	0.00784498	0.233748	NC_009004.1	RefSeq	2474592	2475206	+	transcript_id gene2530; gene_id gene2530; gene_name LLMG_RS12645; Dbxref Genbank:WP_011836138.1; Name WP_011836138.1; gbkey CDS; inference COORDINATES: similar to AA sequence:RefSeq:NP_268396.1; product TetR/AcrR family transcriptional regulator; transl_table 11; gbkey Gene; gene_biotype protein_coding; locus_tag LLMG_RS12645; old_locus_tag llmg_2517; protein_id WP_011836138.1;	LLMG_RS12645;llmg_2517;	n	n
LLMG_RS00680	gene136	-1.3623	7.13737	-5.97018	0.000291694	0.00719901	0.391113	NC_009004.1	RefSeq	122604	122912	+	transcript_id gene136; gene_id gene136; gene_name LLMG_RS00680; Dbxref Genbank:WP_014734898.1; Name WP_014734898.1; gbkey CDS; inference COORDINATES: similar to AA sequence:RefSeq:WP_014734898.1; product hypothetical protein; transl_table 11; gbkey Gene; gene_biotype protein_coding; locus_tag LLMG_RS00680; protein_id WP_014734898.1;	LLMG_RS00680;	n	n
LLMG_RS00905	gene182	-2.65506	6.77183	-13.376	6.74825e-07	0.000128113	6.75187	NC_009004.1	RefSeq	159723	159932	+	transcript_id gene182; gene_id gene182; gene_name LLMG_RS00905; Dbxref Genbank:WP_014571884.1; Name WP_014571884.1; gbkey CDS; inference COORDINATES: similar to AA sequence:RefSeq:NP_266313.1; product hypothetical protein; transl_table 11; gbkey Gene; gene_biotype protein_coding; locus_tag LLMG_RS00905; protein_id WP_014571884.1;	LLMG_RS00905;	n	n
LLMG_RS05250	gene1054	-1.63651	5.87146	-8.25647	2.83161e-05	0.00129415	2.9947	NC_009004.1	RefSeq	998022	998321	+	transcript_id gene1054; gene_id gene1054; gene_name LLMG_RS05250; Dbxref Genbank:WP_014735000.1; Name WP_014735000.1; gbkey CDS; inference COORDINATES: ab initio prediction:GeneMarkS+; product hypothetical protein; transl_table 11; gbkey Gene; gene_biotype protein_coding; locus_tag LLMG_RS05250; protein_id WP_014735000.1;	LLMG_RS05250;	n	n
LLMG_RS06205	gene1245	1.66341	6.26459	9.1033	1.35624e-05	0.000769307	3.73013	NC_009004.1	RefSeq	1199843	1200364	-	transcript_id gene1245; gene_id gene1245; gene_name LLMG_RS06205; Dbxref Genbank:WP_041931188.1; Name WP_041931188.1; gbkey CDS; inference COORDINATES: ab initio prediction:GeneMarkS+; product hypothetical protein; transl_table 11; gbkey Gene; gene_biotype protein_coding; locus_tag LLMG_RS06205; protein_id WP_041931188.1;	LLMG_RS06205;	n	n
LLMG_RS09665	gene1930	1.31887	8.28092	7.66062	4.93471e-05	0.00193315	2.22926	NC_009004.1	RefSeq	1911483	1913494	-	transcript_id gene1930; gene_id gene1930; gene_name LLMG_RS09665; Note frameshifted; gbkey CDS; inference COORDINATES: similar to AA sequence:RefSeq:NP_267905.1; product ABC transporter permease; pseudo true; transl_table 11; gbkey Gene; gene_biotype pseudogene; locus_tag LLMG_RS09665; pseudo true;	LLMG_RS09665;pseudotrue;	n	n
LLMG_RS10815	gene2162	-2.45369	7.64003	-8.21458	2.94124e-05	0.00129625	2.86087	NC_009004.1	RefSeq	2124255	2124458	-	transcript_id gene2162; gene_id gene2162; gene_name LLMG_RS10815; Dbxref Genbank:WP_014735143.1; Name WP_014735143.1; gbkey CDS; inference COORDINATES: similar to AA sequence:RefSeq:NP_268062.1; product PspC domain-containing protein; transl_table 11; gbkey Gene; gene_biotype protein_coding; locus_tag LLMG_RS10815; protein_id WP_014735143.1;	LLMG_RS10815;	n	n

## Sheet: Table 3
# FS1076 vs FS1072 (Control) grown on M17
Gene_code	LogFC	AveExpr	t	P.Value	adj.P.Val	B	Referred genome	Database	Start	End	Strand	Gene_information
gene1013	-2.7648	7.93404	-12.5519	1.11751e-06	0.000190626	6.25624	NC_009004.1	RefSeq	957962	958504	+	transcript_id gene1013; gene_id gene1013; gene_name hpt; Dbxref Genbank:WP_011676466.1; Name WP_011676466.1; gbkey CDS; inference COORDINATES: similar to AA sequence:RefSeq:NP_267675.1; product hypoxanthine phosphoribosyltransferase; transl_table 11; Name hpt; gbkey Gene; gene_biotype protein_coding; locus_tag LLMG_RS05050; old_locus_tag llmg_0993; protein_id WP_011676466.1;
gene1055	-1.04957	6.73038	-6.39035	0.000181885	0.00680138	0.906942	NC_009004.1	RefSeq	998571	998824	+	transcript_id gene1055; gene_id gene1055; gene_name LLMG_RS05255; Note frameshifted; gbkey CDS; inference COORDINATES: similar to AA sequence:RefSeq:WP_015082576.1; product hypothetical protein; pseudo true; transl_table 11; gbkey Gene; gene_biotype pseudogene; locus_tag LLMG_RS05255; old_locus_tag llmg_1034; pseudo true;
gene1058	-0.999038	7.04892	-6.22948	0.000217376	0.00777514	0.704019	NC_009004.1	RefSeq	1000593	1001651	+	transcript_id gene1058; gene_id gene1058; gene_name LLMG_RS05270; Dbxref Genbank:WP_011834963.1; Name WP_011834963.1; gbkey CDS; inference COORDINATES: similar to AA sequence:RefSeq:WP_015082575.1; product phosphoribosylanthranilate isomerase; transl_table 11; gbkey Gene; gene_biotype protein_coding; locus_tag LLMG_RS05270; old_locus_tag llmg_1039; protein_id WP_011834963.1;
gene1061	-1.03774	6.7447	-6.80479	0.000116545	0.00509501	1.38706	NC_009004.1	RefSeq	1003463	1004224	+	transcript_id gene1061; gene_id gene1061; gene_name LLMG_RS05285; Dbxref Genbank:WP_011834966.1; Name WP_011834966.1; gbkey CDS; inference COORDINATES: similar to AA sequence:RefSeq:NP_267618.1; product tryptophan synthase subunit alpha; transl_table 11; gbkey Gene; gene_biotype protein_coding; locus_tag LLMG_RS05285; old_locus_tag llmg_1042; protein_id WP_011834966.1;
gene1109	-1.14371	10.4094	-6.97085	9.80451e-05	0.00483951	1.56032	NC_009004.1	RefSeq	1046961	1050155	+	transcript_id gene1109; gene_id gene1109; gene_name LLMG_RS05530; Dbxref Genbank:WP_011834997.1; Name WP_011834997.1; gbkey CDS; inference COORDINATES: similar to AA sequence:RefSeq:NP_267519.1; product carbamoyl-phosphate synthase large chain; transl_table 11; gbkey Gene; gene_biotype protein_coding; locus_tag LLMG_RS05530; old_locus_tag llmg_1089; protein_id WP_011834997.1;
gene1110	1.8901	7.20639	9.42706	1.03901e-05	0.00106844	3.97234	NC_009004.1	RefSeq	1050354	1050935	+	transcript_id gene1110; gene_id gene1110; gene_name LLMG_RS05535; Dbxref Genbank:WP_011834998.1; Name WP_011834998.1; gbkey CDS; inference COORDINATES: similar to AA sequence:RefSeq:NP_267518.1; product hypothetical protein; transl_table 11; gbkey Gene; gene_biotype protein_coding; locus_tag LLMG_RS05535; old_locus_tag llmg_1090; protein_id WP_011834998.1;
gene1113	1.45273	7.62577	8.97937	1.50504e-05	0.00142863	3.52931	NC_009004.1	RefSeq	1052879	1053883	+	transcript_id gene1113; gene_id gene1113; gene_name LLMG_RS05550; Dbxref Genbank:WP_011835001.1; Name WP_011835001.1; gbkey CDS; inference COORDINATES: similar to AA sequence:RefSeq:WP_011835001.1; product DUF916 domain-containing protein; transl_table 11; gbkey Gene; gene_biotype protein_coding; locus_tag LLMG_RS05550; old_locus_tag llmg_1093; protein_id WP_011835001.1;
gene1114	1.55564	7.18191	9.71154	8.27337e-06	0.000928122	4.20852	NC_009004.1	RefSeq	1053915	1054247	+	transcript_id gene1114; gene_id gene1114; gene_name LLMG_RS05555; Dbxref Genbank:WP_011835002.1; Name WP_011835002.1; gbkey CDS; inference COORDINATES: similar to AA sequence:RefSeq:WP_011835002.1; product hypothetical protein; transl_table 11; gbkey Gene; gene_biotype protein_coding; locus_tag LLMG_RS05555; old_locus_tag llmg_1094; protein_id WP_011835002.1;
gene1115	1.72591	7.9	11.7511	1.87945e-06	0.000257693	5.70359	NC_009004.1	RefSeq	1054244	1055044	+	transcript_id gene1115; gene_id gene1115; gene_name LLMG_RS05560; Dbxref Genbank:WP_041931184.1; Name WP_041931184.1; gbkey CDS; inference COORDINATES: similar to AA sequence:RefSeq:NP_267511.1; product WxL domain-containing protein; transl_table 11; gbkey Gene; gene_biotype protein_coding; locus_tag LLMG_RS05560; old_locus_tag llmg_1095; protein_id WP_041931184.1;
gene1116	1.32805	9.27271	8.92238	1.57947e-05	0.00144375	3.48473	NC_009004.1	RefSeq	1055122	1056285	+	transcript_id gene1116; gene_id gene1116; gene_name LLMG_RS05565; Dbxref Genbank:WP_011835004.1; Name WP_011835004.1; gbkey CDS; inference COORDINATES: similar to AA sequence:RefSeq:WP_011835004.1; product DUF916 and DUF3324 domain-containing protein; transl_table 11; gbkey Gene; gene_biotype protein_coding; locus_tag LLMG_RS05565; old_locus_tag llmg_1096; protein_id WP_011835004.1;
gene1127	-1.30726	7.75323	-7.83025	4.19875e-05	0.00272697	2.53975	NC_009004.1	RefSeq	1068466	1069179	+	transcript_id gene1127; gene_id gene1127; gene_name LLMG_RS05620; Dbxref Genbank:WP_011835015.1; Name WP_011835015.1; gbkey CDS; inference COORDINATES: similar to AA sequence:RefSeq:NP_267501.1; product orotidine-5'-phosphate decarboxylase; transl_table 11; gbkey Gene; gene_biotype protein_coding; locus_tag LLMG_RS05620; old_locus_tag llmg_1107; protein_id WP_011835015.1;
gene1128	-1.46919	6.83523	-6.45668	0.00016915	0.00642251	1.1715	NC_009004.1	RefSeq	1069181	1069639	+	transcript_id gene1128; gene_id gene1128; gene_name LLMG_RS05625; Dbxref Genbank:WP_011835016.1; Name WP_011835016.1; gbkey CDS; inference COORDINATES: similar to AA sequence:RefSeq:WP_011835016.1; product hypothetical protein; transl_table 11; gbkey Gene; gene_biotype protein_coding; locus_tag LLMG_RS05625; old_locus_tag llmg_1108; protein_id WP_011835016.1;
gene1155	-1.44821	7.40183	-6.376	0.000184776	0.00680638	0.84791	NC_009004.1	RefSeq	1102206	1102919	+	transcript_id gene1155; gene_id gene1155; gene_name LLMG_RS05770; Dbxref Genbank:WP_011835041.1; Name WP_011835041.1; gbkey CDS; inference COORDINATES: similar to AA sequence:RefSeq:NP_267474.1; product metal ABC transporter ATP-binding protein; transl_table 11; gbkey Gene; gene_biotype protein_coding; locus_tag LLMG_RS05770; old_locus_tag llmg_1136; protein_id WP_011835041.1;
gene1200	-1.31867	9.98102	-7.19899	7.77014e-05	0.00416103	1.78806	NC_009004.1	RefSeq	1151292	1155761	+	transcript_id gene1200; gene_id gene1200; gene_name LLMG_RS05990; Dbxref Genbank:WP_011835084.1; Name WP_011835084.1; gbkey CDS; inference COORDINATES: similar to AA sequence:RefSeq:NP_267442.1; product glutamate synthase large subunit; transl_table 11; gbkey Gene; gene_biotype protein_coding; locus_tag LLMG_RS05990; old_locus_tag llmg_1183; protein_id WP_011835084.1;
[truncated: 59 more rows]

## Sheet: Table 4
# FS1076 vs FS1072 (Control) grown on SAL
Gene_code	LogFC	AveExpr	t	P.Value	adj.P.Val	B	Referred genome	Database	Start	End	Strand	Gene_information
[truncated: 185 more rows]
